# Supplementary material for: Structures of diverse poxin cGAMP nucleases reveal a widespread role for cGAS-STING evasion in host–pathogen conflict
Source: eLife. 2020 Nov 16;9:e59753. doi: 10.7554/eLife.59753 (PMC7688311; doi:10.7554/eLife.59753)
Supplement: Figure 2—figure supplement 2—source data 1. [file elife-59753-fig2-figsupp2-data1.xlsx]

## Sheet: VACV Poxin
2′3′-cGAMP Conc. (µM)	Initial Rate Tech. Rep. 1 (µM/min)	Initial Rate Replicate 2 (µM/min)	Initial Rate Replicate 3 (µM/min)
0.1	0.127604	0.111688	0.0777831
0.25	0.287449	0.191515	0.136814
0.5	0.487877	0.415323	0.214459
0.75	0.619521	0.45101	0.235352
1	0.728569	0.539827	0.314929
2.5	0.710963	0.765256	0.491117
5	1.05027	0.841883	0.596962

## Sheet: AcNPV Poxin
2′3′-cGAMP Conc. (µM)	Initial Rate Tech. Rep. 1 (µM/min)	Initial Rate Replicate 2 (µM/min)	Initial Rate Replicate 3 (µM/min)
0.25	0.284161	0.283749	0.292668
0.5	0.557977	0.566536	0.574256
0.75	0.845578	0.782943	0.726048
1	1.05167	1.06854	0.984508
2.5	2.0334	1.92056	1.54287
5	2.50863	2.33213	1.92153
10	3.30616	2.85633	2.25908

## Sheet: T. ni Poxin
2′3′-cGAMP Conc. (µM)	Initial Rate Tech. Rep. 1 (µM/min)	Initial Rate Replicate 2 (µM/min)	Initial Rate Replicate 3 (µM/min)
50	16.6983	15.9702	17.9204
100	30.8658	23.4034	30.9406
150	42.5547	25.0843	30.5459
250	55.7087	35.6492	46.3163
500	59.2244	49.7856	81.092
750	85.4942	81.3217	82.225
1000	89.7149	73.9226	82.0204
