# Supplementary material for: Structures of diverse poxin cGAMP nucleases reveal a widespread role for cGAS-STING evasion in host–pathogen conflict
Source: eLife. 2020 Nov 16;9:e59753. doi: 10.7554/eLife.59753 (PMC7688311; doi:10.7554/eLife.59753)
Supplement: Figure 2—figure supplement 2—source data 2. [file elife-59753-fig2-figsupp2-data2.xlsx]

## Sheet: Sheet1
Protein Concentration (µM)	VACV Poxin H17A (% Bound)			AcNPV Poxin H46A (% Bound)
0.025	0	0	0	0	0	0
0.05	0	0	0	0	0	0
0.1	0	0	0	0	0	0
0.2	0	0	0	0	0	0
0.4	14.4064	15.0686	17.1707	1.17525	3.7193	1.5596
0.8	81.7685	79.4312	77.8938	42.2821	56.6844	60.2703
1.6	94.1956	96.1089	96.0054	80.1544	82.05	79.1996
5	100	100	100	100	100	100
20	100	100	100	100	100	100
