# Supplementary material for: Structures of diverse poxin cGAMP nucleases reveal a widespread role for cGAS-STING evasion in host–pathogen conflict
Source: eLife. 2020 Nov 16;9:e59753. doi: 10.7554/eLife.59753 (PMC7688311; doi:10.7554/eLife.59753)
Supplement: Supplementary file 1. — All poxin sequences identified by PSI-BLAST are listed here, along with details for all sequences used to construct the phylogenetic trees in Figure 1 and Figure 6, as well as the protein constructs produced for poxin biochemical activity screens in Figure 1 and Figure 5. [file elife-59753-supp1.xlsx]

## Sheet: All Poxin Sequences
Name	Accession	Common Name	Description	Organism	Sequence	Sequence Length	Taxonomy
AUL80354	AUL80354.1		hypothetical protein [Vaccinia virus]	Vaccinia virus	MNALSSGPIINYHVWIGECFCQVTPVDVHGKEIMKMRFKTGAVLPIPNVVIVKLGENDTDNLFSTISAAPSR	72	Viruses; Varidnaviria; Bamfordvirae; Nucleocytoviricota; Pokkesviricetes; Chitovirales; Poxviridae; Chordopoxvirinae; Orthopoxvirus
AXN56248	AXN56248.1		hypothetical protein [Vaccinia virus]	Vaccinia virus	MNALSSGPIIDYHVWIGDCICQVTAVDVHGKEIMRMRFKKGAVLPIPNLVKVKLGENDTENLSSTISAAPSR	72	Viruses; Varidnaviria; Bamfordvirae; Nucleocytoviricota; Pokkesviricetes; Chitovirales; Poxviridae; Chordopoxvirinae; Orthopoxvirus
AUL80353	AUL80353.1		HSPV180a [Vaccinia virus]	Vaccinia virus	MALFYAHALGRYDENLHAFPGISSTVANEVGKYTVVLVYNNKYDIVKDKYMWCYSQVNKRYIGAVLPMFECNEYLQIGDPIHDQ	84	Viruses; Varidnaviria; Bamfordvirae; Nucleocytoviricota; Pokkesviricetes; Chitovirales; Poxviridae; Chordopoxvirinae; Orthopoxvirus
ABU91880	ABU91880.1		schlafen-like protein [Variola virus]	Variola virus	MNIYKLEIQSMIRRKSNLYRHISLQNYYALSGIGYKSLDLCLEGVGIHHHVLETGNAVYGKVQHDYSTIKEKAKEMSALSPGPIIDYHVWIGDCIGKVTAVDVHGKEIMRM	111	Viruses; Varidnaviria; Bamfordvirae; Nucleocytoviricota; Pokkesviricetes; Chitovirales; Poxviridae; Chordopoxvirinae; Orthopoxvirus
XP_013196883	XP_013196883.1		PREDICTED: uncharacterized protein LOC106139919 isoform X2 [Amyelois transitella]	Amyelois transitella	MERSNLKPTQGELPPPGMSRTVRNEQYKGVVENFSIPAEIHERDGRRFASFGAVVPIHCCTSEEIAERAKTTHHYCDVFTEEKMAPLGELAYVRLDENTAEKVYHTVNECLNVSNAT	117	Eukaryota; Metazoa; Ecdysozoa; Arthropoda; Hexapoda; Insecta; Pterygota; Neoptera; Holometabola; Lepidoptera; Glossata; Ditrysia; Pyraloidea; Pyralidae; Phycitinae; Amyelois
XP_013196884	XP_013196884.1		PREDICTED: uncharacterized protein LOC106139919 isoform X3 [Amyelois transitella]	Amyelois transitella	MERSNLKPTQGELPPPGMSRTVRNEQYKGVVENFSIPAEIHERDGRKFASFGAVVPIHCCTSEEIAERAKTTHHYCDVFTEEKMAPLGELAYVRLDENTAEKVYHTVNECLNVSNAT	117	Eukaryota; Metazoa; Ecdysozoa; Arthropoda; Hexapoda; Insecta; Pterygota; Neoptera; Holometabola; Lepidoptera; Glossata; Ditrysia; Pyraloidea; Pyralidae; Phycitinae; Amyelois
AUO38483	AUO38483.1		21kDa precursor protein [Vaccinia virus]	Vaccinia virus	MISCVQPKSWRCFTHTLSVGTTRIFMPFLEYHRLLPMMSVYNNKYDIVKDKYMWCYSQVNKRYIGALLPMFECNEYLQIGDPIHDQEGNHISPQKLLCSKRNRVRESRLVFGRSRDSSSRT	121	Viruses; Varidnaviria; Bamfordvirae; Nucleocytoviricota; Pokkesviricetes; Chitovirales; Poxviridae; Chordopoxvirinae; Orthopoxvirus
CAB3222271	CAB3222271.1		unnamed protein product [Arctia plantaginis]	Arctia plantaginis	MFFGQVLINRKKRVTVASDHNLAQCHCTSAFKSSNLYTVGASTVNKGSKFVSIVSAKKSNYHTISEGEGGYFDTAVPWLVLDAPEGQDVRHARAAARARFPTGSYTESSRGMWSICNLLSF	121	Eukaryota; Metazoa; Ecdysozoa; Arthropoda; Hexapoda; Insecta; Pterygota; Neoptera; Holometabola; Lepidoptera; Glossata; Ditrysia; Noctuoidea; Erebidae; Arctiinae; Arctia
AGX01211	AGX01211.1		truncated P26 [Bombyx mori nucleopolyhedrovirus]	Bombyx mori nucleopolyhedrovirus	MELYNIKYAIDPTNKIVIEQVDNVDAFVHILEPGQEVFDETLSRYHQFPGVVSSIIFPQLVLNTIISVLSEDGSLLPLKLENTCFNFHVCNKRFVFGNLPAAIVNNETKQCALDLQFLPAKS	122	Viruses; Baculoviridae; Alphabaculovirus
AXN56247	AXN56247.1		hypothetical protein [Vaccinia virus]	Vaccinia virus	MAMFYAHALGGYDENLHAFPGISSTVANDVRKYSVVSVYNNKYDIVKDKYMWCYSQVNKRYIGALLPMFECNEYLQIGDPIHDQEGNQISIITYRHKNYYALSGIGYESLDLCLEGVGIHHHVLET	126	Viruses; Varidnaviria; Bamfordvirae; Nucleocytoviricota; Pokkesviricetes; Chitovirales; Poxviridae; Chordopoxvirinae; Orthopoxvirus
XP_013196882	XP_013196882.1		PREDICTED: uncharacterized protein LOC106139919 isoform X1 [Amyelois transitella]	Amyelois transitella	MTHYVYVILCVEVLLGPNIALGFELPPPGMSRTVRNEQYKGVVENFSIPAEIHERDGRRFASFGAVVPIHCCTSEEIAERAKTTHHYCDVFTEEKMAPLGELAYVRLDENTAEKVYHTVNECLNVSNAT	129	Eukaryota; Metazoa; Ecdysozoa; Arthropoda; Hexapoda; Insecta; Pterygota; Neoptera; Holometabola; Lepidoptera; Glossata; Ditrysia; Pyraloidea; Pyralidae; Phycitinae; Amyelois
YP_009133326	YP_009133326.1		p26 [Lambdina fiscellaria nucleopolyhedrovirus]	Lambdina fiscellaria nucleopolyhedrovirus	MRIFLQSLFFFFIIHHCTVAAFYENDDYDDDNFEDDNVNDKNFNASYINRGQNKKATIFAYRVHGVECEANFEKRIFRVLKIHNRTVTMQTFAPQSSTTGHESLNTLHHYPGVATEVVFPPIASTDTVLDHFGR	134	Viruses; Baculoviridae; Alphabaculovirus
AAT10566	AAT10566.1		unknown [Vaccinia virus]	Vaccinia virus	MNIYKLEIRSMIKKEITYRHKNYYALSGIGYESLDLCLEGVGIHHHVLETENAVYGKVQHDYSTIKEKAKEMNALSSGPIIDYHVWIGDCICQVTAVDVHGKEIMRMRFKKGAVLPIPNLVKVKLGENDTENLSSTISAAPSR	143	Viruses; Varidnaviria; Bamfordvirae; Nucleocytoviricota; Pokkesviricetes; Chitovirales; Poxviridae; Chordopoxvirinae; Orthopoxvirus
AUL80649	AUL80649.1		B2R [Vaccinia virus]	Vaccinia virus	MAMFYAHALGGYDENLHAFPGISSTVANDVRNYSVVAVYNNKYDIVKDKYMWCYSQVNRRSCGALLPMFECNEYLQIGVTIDDQEGNQISIITYRHKNYYALSGIGYERLDLCLDGVGIHHHVLETGNAVYGKVQHDYSTIKEKAKKMNALSP	153	Viruses; Varidnaviria; Bamfordvirae; Nucleocytoviricota; Pokkesviricetes; Chitovirales; Poxviridae; Chordopoxvirinae; Orthopoxvirus
AUO38484	AUO38484.1		21kDa precursor protein [Vaccinia virus]	Vaccinia virus	MEHCCLCLSAMNIYKLEIRSMIKKEITYRHKNYYALSGIGYESLDLCLEGVGIHHHVLETENAVYGKVQHDYSTIKEKAKEMNALSSGPIIDYHVWIGDCICQVTAVDVHGKEIMRMRFKKGAVLPIPNLVKVKLGENDTENLSSTISAAPSR	153	Viruses; Varidnaviria; Bamfordvirae; Nucleocytoviricota; Pokkesviricetes; Chitovirales; Poxviridae; Chordopoxvirinae; Orthopoxvirus
WP_143442192	WP_143442192.1		hypothetical protein, partial [Klebsiella pneumoniae]	Klebsiella pneumoniae	MQPELQSLFQYPSLATSMKLPKINSESVVQLIEFRKNKKIKFVKAKLDTKLYYVHHHYGKYYMYGQVPAIVTFDAKLYNSFIGSPIFDEQYNLVSFVTDCYMNEMGQRIFPVTGESCRLHGMICLNGTVRIYGENDFVQNVLDANININVIYKKKTVEV	159	Bacteria; Proteobacteria; Gammaproteobacteria; Enterobacterales; Enterobacteriaceae; Klebsiella
YP_009133323	YP_009133323.1		p26 [Lambdina fiscellaria nucleopolyhedrovirus]	Lambdina fiscellaria nucleopolyhedrovirus	MVIGHVHAFATADALIVNGVFVGAPVFRGNELISVVTQVFLNPRDKTQTIFVIANERSPRFVAGRYDYDDDGAITVQQLRANMSVYGRRQFPFQNNSPDSSTQLFGAQQYNAAANSNKNYYRNKPRSVYVFHNAHTVHVTLVEGEFEINNLTFDGPLLDKNH	162	Viruses; Baculoviridae; Alphabaculovirus
AF150991_1	AAD39539.1		p26 protein, partial [Trichoplusia ni single nucleopolyhedrovirus]	Trichoplusia ni single nucleopolyhedrovirus	VLLNDGILFRVQPGHVYTNFHRHANRLIYGQLRTFAVDDLWIADKIWIGAPIFFNDRLVSVITCRYDDYDAGIVLFPVSGIRPKGLVSGQINYDSTVYVSLLRNGMSVYGKRQMAYSSPYMTVKKFALSTTANRLTYRDLPRNIAIFHNKKERKPSLWWKANTKYTDLDWTAPLIVPQ	178	Viruses; Baculoviridae; Alphabaculovirus
RVE43054	RVE43054.1	striped riceborer	hypothetical protein evm_012285 [Chilo suppressalis]	Chilo suppressalis	MENYRIIVFLCTLISVHSEKSQASMSKPTVLNSSYKGLVENFSIPVELHERDNKTFASFGGVLPIHCATPEQVSQLSSHTHHYCGVFTEELLAPLEELAYVRLDENLAEKVFINRTKRILLISSDGVLAQWRCAPTFESANKFIAGTPLVNARGQLVSVITARRGNHYAVSTLEVTINK	179	Eukaryota; Metazoa; Ecdysozoa; Arthropoda; Hexapoda; Insecta; Pterygota; Neoptera; Holometabola; Lepidoptera; Glossata; Ditrysia; Pyraloidea; Crambidae; Crambinae; Chilo
YP_008004026	YP_008004026.1		unknown similar to AMEV225 [Adoxophyes honmai entomopoxvirus 'L']	Adoxophyes honmai entomopoxvirus 'L'	MNKKYQYLGFSLSKELSETSENIYIRNKIFSISNFKLINFIYSDNEFLLSEQSTIYSKDPLLSGEFIFNSKNEYIGIITNKLENRYPISQKNDSIIRINNIYNVNIKNQEFPIVYADKEFPDNHSLINYLKLEPQKTKREISIFKLFMKTIIIIHENERNLGEIILNKPCISEYLFNNSVLG	182	Viruses; Varidnaviria; Bamfordvirae; Nucleocytoviricota; Pokkesviricetes; Chitovirales; Poxviridae; Entomopoxvirinae; Betaentomopoxvirus
NP_065007	NP_065007.1		hypothetical protein AMV225 [Amsacta moorei entomopoxvirus]	Amsacta moorei entomopoxvirus	MNKKYQYLGFTLDNKIPSIQNNKIYIRDKDYNISNYKLINFIYDNSDIIISEQSTIYSKENLLYGEYIFNQNKEYVGIITNKLENRYPISQENDNIIRINNVNKVNIKNQQFPVLYCDKEFPNNNILIQYLKLTPQKTKREVTIFKLFMKTIIIIHENERNIGDMLFNNPCISEYMYYDNNISFN	185	Viruses; Varidnaviria; Bamfordvirae; Nucleocytoviricota; Pokkesviricetes; Chitovirales; Poxviridae; Entomopoxvirinae; Betaentomopoxvirus
YP_008003765	YP_008003765.1		unknown similar to AMEV225 [Mythimna separata entomopoxvirus 'L']	Mythimna separata entomopoxvirus 'L'	MNKNFQYLGFTLDKKIPSIIDNRLHIRDKIFNINNFKLINFIFENNDFIVSEQSSIYSKDELLYGEYIFNSENKYMGIITNKLENRYPISQEHDIIIRINNISNITIKNQEFPIIYCDKEFPNKNTLIEYLKLTPQITKREITIFKLFMKTIIVIHENERNIGEIIFNSPCISEYMHHNNINILC	185	Viruses; Varidnaviria; Bamfordvirae; Nucleocytoviricota; Pokkesviricetes; Chitovirales; Poxviridae; Entomopoxvirinae; Betaentomopoxvirus
YP_008004632	YP_008004632.1		unknown similar to AMEV225 [Choristoneura rosaceana entomopoxvirus 'L']	Choristoneura rosaceana entomopoxvirus 'L'	MNKKFQYLGFKMDKKIPVAIDNKIYIRDSEYNISNFKLINFIYDKNDLMISEQSTIYSKQNLLYGEYIFNSNKDYMGIITNKLENRYSISQENDIMIRINNVYNVNIKNQEFPILYCDKEFPNNDILMNYLKLVPQRSRREITIYRLFMKTIIIIHENERNIGEIIFNNPCISEYLGENDNVNFF	185	Viruses; Varidnaviria; Bamfordvirae; Nucleocytoviricota; Pokkesviricetes; Chitovirales; Poxviridae; Entomopoxvirinae; Betaentomopoxvirus
YP_008004331	YP_008004331.1		unknown similar to AMEV225 [Choristoneura biennis entomopoxvirus]	Choristoneura biennis entomopoxvirus	MNKKFQYLGFKMDKKIPVAIDNKIYIRDSEYNISNFKLINFIYDKNDLMISEQSTIYSKQNLLYGEYIFNSNKDYMGIITNKLENRYSISQDNDNMIRINNVYNVNIKNQEFPILYCDKEFPNNDILMNYLKLVPQRSRREITIYRLFMKTIIIIHENERNIGEIIFNNPCISEYLGENDNVNFFN	186	Viruses; Varidnaviria; Bamfordvirae; Nucleocytoviricota; Pokkesviricetes; Chitovirales; Poxviridae; Entomopoxvirinae; Betaentomopoxvirus
NP_048308	NP_048308.1		ORF MSV237 putative vaccinia B2R homolog, similar to SW:P20999 [Melanoplus sanguinipes entomopoxvirus]	Melanoplus sanguinipes entomopoxvirus	MFISHHLGGYNESLHAFPDLSTDKVIDVTKYSKIYVDDNMYIISGLMWIFSKIENRYIGGLVPYFVCNDILEGGSLITDENNTAISCVTMKKDNMYALSGLAYETFDQNINVPIYHHELENGHSVYGSIQGKYEIIKEYAKSFKQSSHNSISEYHIWVGEKLIQITSINNDKKEIFRFRIKKGGILADEYVI	192	Viruses; Varidnaviria; Bamfordvirae; Nucleocytoviricota; Pokkesviricetes; Chitovirales; Poxviridae; Entomopoxvirinae
YP_009408359	YP_009408359.1		N-term half of ECTV schlafen-like protein [Murmansk poxvirus]	Murmansk poxvirus	MEFYPHSLGGYDSSLHAFPGLSATVVNNVTNYTKITVNGNTYDVSDVYMWCYSYVDNRYIGGLLPMFECKDDLKVGEPICDLHGTQISAVTFRCDNYYAISGIGYETLDICTNDDIKIHHHKLSIGKSVYGDTADDYDVIKSMANRYSDYKTEHIKEYHIWVGVNIIHITTVDKNRKEISRVRVKRGGCLMNS	193	Viruses; Varidnaviria; Bamfordvirae; Nucleocytoviricota; Pokkesviricetes; Chitovirales; Poxviridae; Chordopoxvirinae; Centapoxvirus; unclassified Centapoxvirus
YP_009408559	YP_009408559.1		Schlafen [NY_014 poxvirus]	NY_014 poxvirus	MEFYPHSLGGYDSSLHAFPGLSATVVNNVTNYNKITVNGNTYNVSDVYMWCYSYVDNRYIGGLLPMFECKDDLKVGEPICDLHGAQISAVTFRCDDYYAISGIGYETFDICTNNDIKIHHHKLSIGKSVYGDTADDYDVIKSMASCYSDYKPGYIKEYHIWVGVNIIHITAVDKNRKEISRVRVKRGGCLMNS	193	Viruses; Varidnaviria; Bamfordvirae; Nucleocytoviricota; Pokkesviricetes; Chitovirales; Poxviridae; Chordopoxvirinae; Centapoxvirus; unclassified Centapoxvirus
YP_009182253	YP_009182253.1		acetyltransferase-like protein [Diatraea saccharalis granulovirus]	Diatraea saccharalis granulovirus	MDTLVPFGRVQFKRTHHHYCGFYSLQQLSSIVDDKVVVNGKEYEVTGETAIDWAYDGVDTIVAEKRLVYSKEEWPLHGVIYNINEEIVGLVGQGVKTADGDYCYAIQDGFNLYTNHLSNINLIVREKNKLIAYADKEFDDKNELIKYLDNTKGGGGEVGAILYHKNKKQAQLILYQSGVQLSNTHLRKSVFGVL	194	Viruses; Baculoviridae; Betabaculovirus
YP_009268718	YP_009268718.1		schlafen protein [Pteropox virus]	Pteropox virus	MAAAKFLPHLDADAAVNKLHCFPGLSSNKAVDVTQFSHVVVNGCRYETHRYMWVSSTIGERYIGGFLPYILIEGANKPEVGDLIYSEDGEPISCITRSKGDAFCVSGIGYETLDLQSNVRVHHRTIVDKHSVYGGQQGPYCVIKQYALEKAARSSGSVTDYYVWIGDNITHIVGTCANGKEVSRVRIKHGGIFS	194	Viruses; Varidnaviria; Bamfordvirae; Nucleocytoviricota; Pokkesviricetes; Chitovirales; Poxviridae; Chordopoxvirinae
QDJ95127	QDJ95127.1		schlafen-like protein [Hypsugopox virus]	Hypsugopox virus	MDNGAIFFPHSLHDYNPSLHAFPGLSANVSINVTKLKYVIVENKKYKVYKYVWFSSIIGNRYIGAFLPYFKSNKKINVGVIIYDDKNNPVSCITGFNENLYVISGIGYETLDVDVSNGINVIHHVLKDGNSIYGSNQNIYDVIKQIAQEKSIIKSNNIVKYNIWIGSSISQITAVDDNDKEIMRTRIKHGGYIVK	195	Viruses; Varidnaviria; Bamfordvirae; Nucleocytoviricota; Pokkesviricetes; Chitovirales; Poxviridae; unclassified Poxviridae
YP_009408111	YP_009408111.1		Partial schlafen-like protein [Eptesipox virus]	Eptesipox virus	MSATTVAFYPHSLCEYDSNLHAFPGLSSTKAINVSTIKYVIVEGKKYKVYKYIWASSIVENRYIGGFLPYFKSKQQHKPGIIIYNEENEPISCITNFINNLYVISGIGYETFDIDVSESIEIKHHILKDGNSIYGSIQNKYPIIKPIAQEKSKLKSGPIVKYNIWVGKDITQITAVDNQDKEVMRTRIKHGGYIIE	196	Viruses; Varidnaviria; Bamfordvirae; Nucleocytoviricota; Pokkesviricetes; Chitovirales; Poxviridae; unclassified Poxviridae
NP_663224	NP_663224.1		hypothetical protein [Phthorimaea operculella granulovirus]	Phthorimaea operculella granulovirus	MMDVPTLVPFGQIQYKSTHHHYCGFYSLTVLAEIVDNTVVVNGKLYTVSDETAIDWAYDGIDTIISEKRLVYTNNVWPLNAPIYNIEHQIVGIVTRGIETTDGDNCYAVQDGFRLLNIHLSNVNLLVREKRKPIVYADQQFDTKQELNVYLTKNKSADSKYGAIMYHTNKLNAQLVLFAKGHQISNIHLRKKIFGAL	197	Viruses; Baculoviridae; Betabaculovirus
QBH67193	QBH67193.1		hypothetical protein PhopGVgp059 [Phthorimaea operculella granulovirus]	Phthorimaea operculella granulovirus	MMDVPTLVPFGQIQYKSTHHHYCGFYSLTVLAEIVDNTVVVNGKLYTVSDETAIDWAYDGIDTIISEKRLVYTNNVWPLNAPIYNIEHQIVGIVTRGIETTDGDNCYAVQDGFRLLNIHLSNVNLLVREKRKPIVYADQQFDTKQELNVYLTKNKIADSKYGAIMYHTNKLNAQLVLFAKGHQISNIHLRKKIFGAL	197	Viruses; Baculoviridae; Betabaculovirus
ADO85481	ADO85481.1		unknown [Pieris rapae granulovirus]	Pieris rapae granulovirus	MESLAPFGYNKVSFKQTHHHYCGFYSLNILANIIDNVVVVNGKQYPVSDETAIDWAYDGVDTIVCEKRLVYTEREWPLHTLIYNINNQIVGLVTRGVQLSTQEYCYAVQDGFNLYNNHLTGMNLIVREKKKLIAYADREFDNKSELKIYIEETQKKNCNILSYGAILYHVNKKNAQLILHNNGVQISNSQLRKSVFGNI	199	Viruses; Baculoviridae; Betabaculovirus; unclassified Betabaculovirus
AHD24842	AHD24842.1		hypothetical protein [Pieris rapae granulovirus]	Pieris rapae granulovirus	MESLAPFGYNKVSFKQTHHHYCGFYSLNILANIIDNVVVVNGKQYPVSDETAIDWAYDGVDTIVCEKRLVYTEREWPLHTPIYNINNQIVGLVTHGVQLSSQEYCYAVQDGFNLYNNHLTGMNLIVREKKKLIAYADREFDNKSELQIYIEETQKKNCNILGYGAILYHVNKKNAQLILHNNGLQISNSRLRKNVFGNI	199	Viruses; Baculoviridae; Betabaculovirus; unclassified Betabaculovirus
KOB73537	KOB73537.1	winter moth	Immune-related Hdd13 [Operophtera brumata]	Operophtera brumata	MTVACKYVQENRAKRAVSRACRGDVHPGRDPRARRQEVEEHSKTTHHYCDVFTEQVLAPLGELAYVRVDENTAEKVAILSHHVFINRNKSILIISSDGMLAQWRCAPTFESTNMYIAGTPIVSARQLVYGDRTFPSREALREFVAALPPGAASPPGAAVDFTPVLHLAPAPRVSLVADSGRQIAHNILQGVIVKDIEYL	199	Eukaryota; Metazoa; Ecdysozoa; Arthropoda; Hexapoda; Insecta; Pterygota; Neoptera; Holometabola; Lepidoptera; Glossata; Ditrysia; Geometroidea; Geometridae; Larentiinae; Operophtera
YP_003429378	YP_003429378.1		acetyltransferase [Artogeia rapae granulovirus]	Artogeia rapae granulovirus	MESLAPFGYNKVSFKQTHHHYCGFYSLNILANIIDNVVVVNGKQYPVSDETAIDWAYDGVDTIVCEKRLVYTEREWPLHTPIYNINNQIVGLVTRGVQLSSQEYCYAVQDGFNLYNNHLTGMNLIVRQKKKLIAYADREFDNKSELKIYIEETQNKNCNILNYGAILYHVNKKNAQLILHNNGVQISNSQLRKSVFGNI	199	Viruses; Baculoviridae; Betabaculovirus
YP_009229944	YP_009229944.1		hypothetical protein [Cnaphalocrocis medinalis granulovirus]	Cnaphalocrocis medinalis granulovirus	MNIEIIPFGVKGSSRYKATHLHYCGYYSNTLLAHIVQNVVVVENENFVVSENTAIDWAYDGHDTIITEKRLVYTIKEWPIHTPIYNIHKQLVGIVTYGVQQSSKTYCYAIQDGFRLFNCHLSNLCLVVREKTKKFVYADKQFDMKEDLVRYVHSLLPSYYDANGAILYHTKKFDTQLVLHQGNQQISIIQLRRPIFGAV	199	Viruses; Baculoviridae; Betabaculovirus
YP_009513099	YP_009513099.1		hypothetical protein AsGV069 [Agrotis segetum granulovirus]	Agrotis segetum granulovirus	MNHSTVPSLVPFDGSSLYKSTHHHYCGFYSLFILAPIIDDTVVVDGKQYKLSEENAIDWAYDGTDTIITEKRLLYTEHPLEPNTLIYNVNHEIVGILLRYMVTKDGEYCYAIQDGFKLYNNHLTDTNIVVREKKKLIVYADQQFDTKEDLMKYLKEGKKSAGRGAILYHKGGRDAQLVLYENGRNLSNSHLRRRVFGVL	199	Viruses; Baculoviridae; Betabaculovirus
NP_872510	NP_872510.1		ORF_56 [Adoxophyes orana granulovirus]	Adoxophyes orana granulovirus	METTTINGIVPFGVDTIQYKATRHHYCGFYSTILLSGIVNNVVIVDGDRYDVSNETVLDWAYDGIDTILTEKRIVYSNKPWLLHEPIYNVNMEIIGIVLQNYTHDADKYVYLVQDGYNLYSNLLSNVNLIVREKTKPIAYADQLFDTKKELFEYLNTTNLNKETGKYGAILYHQNSKNAQLMLHFDGKQLSNSHLRKNIFI	201	Viruses; Baculoviridae; Betabaculovirus
XP_011565403	XP_011565403.1	diamondback moth	PREDICTED: uncharacterized protein LOC105395164 [Plutella xylostella]	Plutella xylostella	MNLVVFLKTISVYAPKTHHYCDVFTEQVLAPLEELAFVRLDQNTAEKVFINRKKRILLTSSDGALAQWRCAPTFESSNQYIAGAPIVNKEGALISVVTARVGNHYAVSSFEGDGGYFETPQPWKILDSSTGLIYGDRVFPTHEALKDFIATLGPAALGPDRPPTPVLVRGANPRVAFITKEGRQIAHNYLQGVISKGVEYL	201	Eukaryota; Metazoa; Ecdysozoa; Arthropoda; Hexapoda; Insecta; Pterygota; Neoptera; Holometabola; Lepidoptera; Glossata; Ditrysia; Yponomeutoidea; Plutellidae; Plutella
YP_009091897	YP_009091897.1		hypothetical protein [Erinnyis ello granulovirus]	Erinnyis ello granulovirus	MQSSVVPFGDNTFPIKQTHHHYCGFYSVQVLATIINNVVVVNGKQYNVSDETAIDWAFDGEDTIVTEKRLLYTDEELPLHAPIYNIDHQLVGIVLAGMQTTDGDYCYAIQDGFKSLNIHLSNMNLVVREKRKMACYADQQFDTKQELVDYINNRRRIDEMGDSDHGAILYHVNKKNAQLVVFQNGLQVINCHLRKKVFGVL	201	Viruses; Baculoviridae; Betabaculovirus
YP_654469	YP_654469.1		unknown [Choristoneura fumiferana granulovirus]	Choristoneura fumiferana granulovirus	MMNNLSVIMEALVPFGVNNISLKQTHHHYCGFYSLNILASIINNVVIIDNIHYEVSNDTAIDWAFDGEDTIITEKRLLYTNADLPLYATIFNLNHDIVGMVLRGIQTSDGKYCYALQDGFRLYNNHLSNVNLIVREKQKIIAYADRQFDNKQELVDYLNNDEEHKNSGAILYHTNTKNAQLILYKKGLQISNCHLRKTIYAV	202	Viruses; Baculoviridae; Betabaculovirus
YP_004821513	YP_004821513.1		schlafen-like protein [Yokapox virus]	Yokapox virus	MKKHNYHKYMMEFYPHALGGYNPDLHSFPGLSSTIVNNVTKYDEISVNNDVYKVSDLYMWCYSYVNNRYIGGLLPMFECKKDLNIGEPICDKHGTQISAVTFRCNDYYAISGIGYETLDVCLNDDIKIYHHKLSSGKSVYGNTEAEYDIIKSMARNYSIYKPGHIYAYHIWVRNDIVIITTTDKNCKEISRMRIKKGGCLINS	203	Viruses; Varidnaviria; Bamfordvirae; Nucleocytoviricota; Pokkesviricetes; Chitovirales; Poxviridae; Chordopoxvirinae; Centapoxvirus
YP_009505994	YP_009505994.1		Clas52 [Clostera anastomosis granulovirus B]	Clostera anastomosis granulovirus B	MQSSLVPFAGNTTLHLKQTHHHYCGFFSLHVLATIIDNVVVINGRQYTVSEDTAIDWAFDGVDTIVTEKRLLYTEESLPLHSPIYNIENNIVGLVLRGYVTTDGDWCYAIQNGFTAQNFHLSNNNLVVREKRRLISYADQQFDTKQELVEYLEGLKSRDKDSFNIHKNFNTGAILYHVHKKNAQLVVYQDGVQILNCHLRKNVYGVL	207	Viruses; Baculoviridae; Betabaculovirus
ATB55239	ATB55239.1		CPXV197 protein [Cowpox virus]	Cowpox virus	MAMFYAHAFGGYDENLHAFPGISSTVANDVRKYSVVSVYNKKYKIVKNKYMWCYSQVNKRYIGALLPMFECNDYLQIGDPIHDLEGNQISIVTYRHKNYYALSGIGYESLDVCLEGVGIHHHTLEAGNAVYGKVQHEYHTIKEKAKEMNSLSPGPIIDYHVWIGDCVCQVTAVDVHGKEIMRMRFKKGAVLPIPNLVKVKVGEENDTVNLSTSISVS	217	Viruses; Varidnaviria; Bamfordvirae; Nucleocytoviricota; Pokkesviricetes; Chitovirales; Poxviridae; Chordopoxvirinae; Orthopoxvirus
ATB55676	ATB55676.1		CPXV197 protein [Cowpox virus]	Cowpox virus	MAMFYAHAFGGYDENLHAFPGISSTVANDVRKYSIVSVYNKKYKIVKNKYMWCYSQVNKRYIGALLPMFECNDYLQIGDPIHDLEGNQISIVTYRHKNYYALSGIGYESLDVCLEGVGIHHHTLEAGNAVYGKVQHEYHTIKEKAKEMNSLSPGPIIDYHVWIGDCVCQVTAVDVHGKEIMRMRFKKGAVLPIPNLVKVKVGEENDTVNLSTSISVS	217	Viruses; Varidnaviria; Bamfordvirae; Nucleocytoviricota; Pokkesviricetes; Chitovirales; Poxviridae; Chordopoxvirinae; Orthopoxvirus
AVO21184	AVO21184.1		schlafen-like protein [Buffalopox virus]	Buffalopox virus	MAMFYAHALGGYDENLHAFPGISSTVANDVRKYSVVLVYNNKYDIVKDKYMWCYSQVNKRYIGALLPMFECNEYLQIGDPIHDQEGNQISIITYRHKNYYALSGIGYESLDLCLEGVGIHHHVLETGNAVYGKVQHDYSTIKEKAKEMSTLSPGPIIDYHVWIGDCICQVTAVDVHGKEIMRMRFKKGAVLPIPNLVKVGENDTENLSSTISAAPSR	217	Viruses; Varidnaviria; Bamfordvirae; Nucleocytoviricota; Pokkesviricetes; Chitovirales; Poxviridae; Chordopoxvirinae; Orthopoxvirus; Vaccinia virus
SPN68040	SPN68040.1		CPXV197 protein [Cowpox virus]	Cowpox virus	MAMFYAHAFGGYDENLHAFPGISSTVANDVRKYSVVSVYNKKYKIVKNKYMWCYSQVNKRYIGALLPMFECNEYLQIGDPIHDLEGNQISIVTYHNKNYYALSGIGYESLDVCLEGVGIHHHTLEAGNAVYGKVQHDYYTIKEKAKEMNSLSPGPIIDYHVWIGDCVCQVTAVDVHGKEIMRMRFKRGAVIPIPNLVKVKVGEENDTVNLSTSISVS	217	Viruses; Varidnaviria; Bamfordvirae; Nucleocytoviricota; Pokkesviricetes; Chitovirales; Poxviridae; Chordopoxvirinae; Orthopoxvirus
YP_009001652	YP_009001652.1		nucleopolyhedrovirus p26 protein [Anomala cuprea entomopoxvirus]	Anomala cuprea entomopoxvirus	MDIISWGLYNNKYVTIDNYYIKPIHFSDKNSINKYYQFPNLITEKLLSKNIYDHKKIMIIDDNANILNFNVNDSVLTYHKFNHSIIGGILPGFKYEKFIYPGTPIFDSNTGELISIITINYKYKNYYIYPISGPGKSSWNIKFKGFDPKIYYVELSKTQSEYIKDETKNNTYMDDKYFDIVITINRFDNIVNLIKVQSNGYELERMRFECNENIKVIT	218	Viruses; Varidnaviria; Bamfordvirae; Nucleocytoviricota; Pokkesviricetes; Chitovirales; Poxviridae; Entomopoxvirinae; Alphaentomopoxvirus
AAQ93281	AAQ93281.1		VACCL3_195 [Vaccinia virus]	Vaccinia virus	MAMFYAHALGGYDENLHAFPGISSTVANDVRKYSVVSVYNNKYDIVKDKYMWCYSQVNKRYIGALLPMFECNEYLQIGDPIHDQEGNQISIITYRHKNYYALSGIGYESLDLCLEGVRIHHHVLETGNAVYGKVQHDYSTIKEKAKEMSTLSPGPIIDYHVWIGDCICQVTAVDVHGKEIMKMRFKKGAVLPIPNLVKVKLGENDTENLSSTISAAPSR	219	Viruses; Varidnaviria; Bamfordvirae; Nucleocytoviricota; Pokkesviricetes; Chitovirales; Poxviridae; Chordopoxvirinae; Orthopoxvirus
AAR18027	AAR18027.1		VACAC2_195 [Vaccinia virus]	Vaccinia virus	MAMFYAHALGGYDENLHAFPGISSTVANDVRKYSVVSVYNNKYDIVKDKYMWCYSQVNKRYIGALLPMFECNEYLQIGDPIHDQEGNQISIITYRHKNYYALSGIGYESLDLCLEGVGIHHHVLEAGNAVYGKVQHDYSTIKEKAKEMSTLSPGPIIDYHVWIGDCICQVTAVDVHGKEIMKMRFKKGAVLPIPNLVKVKLGENDTENLSSTISAAPSR	219	Viruses; Varidnaviria; Bamfordvirae; Nucleocytoviricota; Pokkesviricetes; Chitovirales; Poxviridae; Chordopoxvirinae; Orthopoxvirus
AAW23627	AAW23627.1		hypothetical protein m8238R [Vaccinia virus]	Vaccinia virus	MAMFYAHALGGYDENLHAFPGISSTVANDVRKYSVVLVYNNKYDIVKDKYMWCYSQVNKRYIGALLPMFECNEYLQIGDPIHDQEGNQISIITYRHKNYYALSGIGYESLDLCLEGVGIHHHVLETGNAVYGKVQHDYSTIKEKAKEMSTLSPGPIIDYHVWIGDCICQVTAVDVHGKEIMRMRFKKGAVLPIPNLVKVKLGENDTENLSSTISAAPSR	219	Viruses; Varidnaviria; Bamfordvirae; Nucleocytoviricota; Pokkesviricetes; Chitovirales; Poxviridae; Chordopoxvirinae; Orthopoxvirus
ABD52680	ABD52680.1		hypothetical protein List178 [Vaccinia virus]	Vaccinia virus	MAMFYAHALGGYDENLHAFPGISSTVANDVRKYSVVLVYNNKYDIVKDKYMWCYSQVNKRYIGALLPMFECNEYLQIGDPIHDQEGNQISIITYRHKNYYALSGIGYESLDLCLEGVGIHHHVLETGNAVYGKVQHDYSTIKEKAKEMNALSPGPIIDYHVWIGDCICQVTAVDVHGKEIMKMRFKKGAVLPIPNLVKVKLGENDTENLSSTISAAPSR	219	Viruses; Varidnaviria; Bamfordvirae; Nucleocytoviricota; Pokkesviricetes; Chitovirales; Poxviridae; Chordopoxvirinae; Orthopoxvirus
ABD57713	ABD57713.1		VACV175 [Vaccinia virus]	Vaccinia virus	MAMFYAHALGGYDENLHAFPGISSTVANDVRKYSVVSVYNNKYDIVKDKYMWCYSQVNKRYIGALLPMFECNEYLQIGDPIHDQEGNQISIITYRHKNYYALSGIGYESLDLCLEGVGIHHHVLEAGNAVYGKVQHDYSTIKEKAKEMNALSSGPIIDYHVWIGDCICQVTAVDVHGKEIMRMRFKKGAVLPIPNLVKVKLGENDTENLSSTISAAPSR	219	Viruses; Varidnaviria; Bamfordvirae; Nucleocytoviricota; Pokkesviricetes; Chitovirales; Poxviridae; Chordopoxvirinae; Orthopoxvirus
ABH08291	ABH08291.1		HSPV180a [Horsepox virus]	Horsepox virus	MAMFYAHALGGYDENLHAFPGISSTVANDVRKYSVVLVYNNKYDIVKDKYMWCYSQVNKRYIGALLPMFECNEYLQIGDPIHDQEGNQISIITYRHKNYYALSGIGYESLDLCLEGVRIHHHTLEAGNAVYGKVQHDYSTIKEKAKEMNALSSGLIIDYHVWIGDCICQVTAVDVHGKEIMRMRFKKGAVLPIPNLVKVKLGENDTENLSSTISAAPSR	219	Viruses; Varidnaviria; Bamfordvirae; Nucleocytoviricota; Pokkesviricetes; Chitovirales; Poxviridae; Chordopoxvirinae; Orthopoxvirus; Vaccinia virus
ABZ80154	ABZ80154.1		unknown [synthetic Vaccinia virus]	synthetic Vaccinia virus	MAMFYAHALGGYDENLHAFPGISSTVANDVRKYSVVSVYNNKYDIVKDKYMWCYSQVNKRYIGALLPMFECNEYLQIGNPIHDQEGNQISIITYRHKNYYALSGIGYESLDLCLEGVGIHHHVLETGNAVYGKVQHDYSTIKEKAKEMSALSPGPIIDYHVWIGDCICQVTAVDVHGKEIMKMRFKKGAVLPIPNLVKVKLGENDTENLSSTISAAPSR	219	other sequences; artificial sequences
AEY72758	AEY72758.1		hypothetical protein VAC_DPP9_195 [Vaccinia virus]	Vaccinia virus	MAMFYAHALGGYDENLHAFPGISSTVANDVRKYSVVSVYNNKYDIVKDKYMWCYSQVNKRYIGALLPMFECNEYLQIGDPIHDQEGNQISIITYRHKNYYALSGIGYESLDLCLEGVGIHHHVLETGNAVYGKVQHDYFTIKEKAKEMNALSSGPIIDYHVWIGDCICQVTAVDVHGKEIMKMRFKKGAVLPIPNLVKVKLGENDTENLSSTISAAPSR	219	Viruses; Varidnaviria; Bamfordvirae; Nucleocytoviricota; Pokkesviricetes; Chitovirales; Poxviridae; Chordopoxvirinae; Orthopoxvirus
AEY72997	AEY72997.1		hypothetical protein VAC_DPP10_195 [Vaccinia virus]	Vaccinia virus	MAMFYAHALGGYDENLHAFPGISSTVANDVRKYSVVSVYNNKYDIVKDKYMWCYSQVNKRYIGALLPMFECNEYLQIGDPIHDQEGNQISIITYRHKNYYALSGIGYESLDLCLEGVRIHHHTLETGNAVYGKVQHDYSTIKEKAKEMSTLSPGPIIDYHVWIGDCICQVTAVDVHGKEIMKMRFKKGAVLPIPNLVKVKLGENDTENLSSTISAAPSR	219	Viruses; Varidnaviria; Bamfordvirae; Nucleocytoviricota; Pokkesviricetes; Chitovirales; Poxviridae; Chordopoxvirinae; Orthopoxvirus
AEY73473	AEY73473.1		hypothetical protein VAC_DPP12_195 [Vaccinia virus]	Vaccinia virus	MAMFYAHALGGYDENLHAFPGISSTVANDVRKYSVVSVYNNKYDIVKDKYMWCYSQVNKRYIGALLPMFECNEYLQIGDPIHDQEGNQISIITYRHKNYYALSGIGYESLDLCLEGVGIHHHVLETGNAVYGKVQHDYSTIKEKAKEMSTLSPGPIIDYHVWIGDCICQVTAVDVHGKEIMKMRFKKGAVLPIPNLVKVKLGENDTENLSSTISAAPSR	219	Viruses; Varidnaviria; Bamfordvirae; Nucleocytoviricota; Pokkesviricetes; Chitovirales; Poxviridae; Chordopoxvirinae; Orthopoxvirus
AEY73716	AEY73716.1		hypothetical protein VAC_DPP13_195 [Vaccinia virus]	Vaccinia virus	MAMFYAHALGGYDENLHAFPGISSTVANDVRKYSVVSVYNNKYDIVKDKYMWCYSQVNKRYIGALLPMFECNEYLQIGDPIHDQEGNQISIITYRHKNYYALSGIGYESLDLCLEGVRIHHHTLEAGNAVYGKVQHDYSTIKEKAKEMNALSSGPIIDYHVWIGDCICQVTAVDVHGKEIMKMRFKKGAVLPIPNLVKVKLGENDTENLSSTISAAPSR	219	Viruses; Varidnaviria; Bamfordvirae; Nucleocytoviricota; Pokkesviricetes; Chitovirales; Poxviridae; Chordopoxvirinae; Orthopoxvirus
AEY74653	AEY74653.1		hypothetical protein VAC_DPP19_195 [Vaccinia virus]	Vaccinia virus	MAMFYAHALGGYDENLHAFPGISSTVANDVRKYSVVSVYNNKYDIVKDKYMWCYSQVNKRYIGALLPMFECNEYLQIGDPIHDQEGNQISIITYRHKNYYALSGIGYESLDLCLEGVGIHHHTLEAGNAVYGKVQHDYSTIKEKAKEMSTLSPGPIIDYHVWIGDCICQVTAVDVHGKEIMRMRFKKGAVLPIPNLVKVKLGENDTENLSSTISAAPSR	219	Viruses; Varidnaviria; Bamfordvirae; Nucleocytoviricota; Pokkesviricetes; Chitovirales; Poxviridae; Chordopoxvirinae; Orthopoxvirus
AGB75902	AGB75902.1		hypothetical protein [Vaccinia virus]	Vaccinia virus	MAMFYAHALGGYDENLHAFPGISSTVANDVRKYSVVSVYNNKYDIVKDKYMWCYSQVNKRYIGALLPMFECNEYLQIGDPIHDQEGNQISIITYRHKNYYALSGIGYESLDLCLEGVGIHHHVLETGNAVYGKVQHDYSTIKEKAKEMNALSSGPIIDYHVWIGDCICQVTAVDVHGKEIMRMRFKKGAVLQIPNLVKVKLGENDTENLSSTISAAPSR	219	Viruses; Varidnaviria; Bamfordvirae; Nucleocytoviricota; Pokkesviricetes; Chitovirales; Poxviridae; Chordopoxvirinae; Orthopoxvirus
AGJ91659	AGJ91659.1		schlafen [Vaccinia virus]	Vaccinia virus	MAMFYAHALGGYDENLHAFPGISSTVANDVRKYSVVSVYNNKYDIVKDKYMWCYSQVNKRYIGALLPMFECNEYLQIGDPIHDQEGNQISIITYRHKNYYALSGIGYESLDLCLEGVRIHHHTLEAGNAVYGKVQHDYSTIKEKAKEMNALSSGPIIDYHVWIGDCICQVTAVDVHGKEIMRMRFKKGAVLPIPNLVKVKLGENDTENLSSTISAAPSR	219	Viruses; Varidnaviria; Bamfordvirae; Nucleocytoviricota; Pokkesviricetes; Chitovirales; Poxviridae; Chordopoxvirinae; Orthopoxvirus
AGK06653	AGK06653.1		hypothetical protein VAC_TP3_189 [Vaccinia virus]	Vaccinia virus	MAMFYAHALGGYDENLHAFPGISSTVANDVRKYSVVSVYNNKYDIVKDKYMWCYSQVNKRYIGALLPMFECNEYLQIGDPIHDQEGNQISIITYRHKNYYALSGIGYESLDLCLEGVGIHHHVLETGNAVYGKVQHDYSTIKEKAKEMSTLSPGPIIDYHVWIGDCICQVTAVNVHGKEIMRMRFKKGAVLPIPNLVKVKLGENDTENLSSTISAAPSR	219	Viruses; Varidnaviria; Bamfordvirae; Nucleocytoviricota; Pokkesviricetes; Chitovirales; Poxviridae; Chordopoxvirinae; Orthopoxvirus
AHB35823	AHB35823.1		hypothetical protein [Vaccinia virus]	Vaccinia virus	MAMFYAHALGGYDENLHAFPGISSTVANDVRKYSVVLVYNNKYDIVKDKYMWCYSQVNKRYIGALLPMFECNEYLQIGDPIHDQEGNQISIITYRHKNYYALSGIGYESLDLCLEGVGIHHHTLEAGNAVYGKVQHDYFTIKEKAKEMNALSSGPIINYHVWIGDCICQVTAVDVHGKEIMRMRFKKGAVLPIPNLVKVKLGENDTENLFSTISAAPSR	219	Viruses; Varidnaviria; Bamfordvirae; Nucleocytoviricota; Pokkesviricetes; Chitovirales; Poxviridae; Chordopoxvirinae; Orthopoxvirus
AIX99305	AIX99305.1		schlafen [Vaccinia virus]	Vaccinia virus	MAMFYAHALGGYDENLHAFPGISSTVANDVRKYSVVSVYNNKYDIVKDKYMWCYSQVNKRYIGALLPMFECNEYLQIGDPIHDQEGNQISIITYRHKNYYALSGIGYESLDLCLEGVGIHHHTLEAGNAVYGKVQHDYSTIKEKAKEMNALSSGPIIDYHVWIGDCICQVTAVDVHGKEIMRMRFKKGAVLPIPNLVKVKLGENDTENLSSTISAAPSR	219	Viruses; Varidnaviria; Bamfordvirae; Nucleocytoviricota; Pokkesviricetes; Chitovirales; Poxviridae; Chordopoxvirinae; Orthopoxvirus
ALF05185	ALF05185.1		schlafen-like protein [Vaccinia virus]	Vaccinia virus	MAMFYAHALGGYDENLHAFPGISSTVANDVRKYSVVSVYNNKYDIVKDKYMWCYSQVNKRYIGALLPMFECNEYLQIGDPIHDQEGNQISIITYRHKNYYALSGIGYESLDLCLEGVRIHHHTLEAGNAVYGKVQHDYFTIKEKAKEMNALSSGPIIDYHVWIGDCICQVTAVDVHGKEIMRMRFKKGAVLPIPNLVKVKLGENDTENLSSTISAAPSR	219	Viruses; Varidnaviria; Bamfordvirae; Nucleocytoviricota; Pokkesviricetes; Chitovirales; Poxviridae; Chordopoxvirinae; Orthopoxvirus
AND74018	AND74018.1		hypothetical protein [Vaccinia virus]	Vaccinia virus	MAMFYAHAFGGYDENLHAFPGISSTVANDVRKYSVVLVYNNKYDIVKDKYMWCYSQVNKRYIGALLPMFECNEYLQIGDPIHDQEGNQISIITYCHKNYYALSGIGYESLDLCLEGVGIHHHVLETGNAVYGKVQHDYSTIKEKAKEMSTLSSGPIIDYHVWIGDCICQVTAVDVHGKEIMKMRFKKGAVLPIPNLVKVKLGENDTENLSSTISAAPSR	219	Viruses; Varidnaviria; Bamfordvirae; Nucleocytoviricota; Pokkesviricetes; Chitovirales; Poxviridae; Chordopoxvirinae; Orthopoxvirus
AQY54957	AQY54957.1		Schlafen-like protein [Vaccinia virus]	Vaccinia virus	MAMFYAHALGGYDENLHAFPGISSTVANDVRKYSVVSVYNNKYDIVKDKYMWCYSQVNKRYIGALLPMFECNEYLQIGDPIHDQEGNQISIITYRHKNYYALSGIGYESLDLCLEGVGIHHHVLETGNAVYGKVQHDYSTIKEKAKEMNALSSGPIIDYHVWIGDCICQVTAVDVHGKEIMKMRFKKGAVLPIPNLVKVKLGENDTENLSSTISAAPSR	219	Viruses; Varidnaviria; Bamfordvirae; Nucleocytoviricota; Pokkesviricetes; Chitovirales; Poxviridae; Chordopoxvirinae; Orthopoxvirus
POXIN_VACCC	P20999.1		RecName: Full=Poxin; AltName: Full=Immune nuclease	Vaccinia virus Copenhagen	MAMFYAHALGGYDENLHAFPGISSTVANDVRKYSVVSVYNNKYDIVKDKYMWCYSQVNKRYIGALLPMFECNEYLQIGDPIHDQEGNQISIITYRHKNYYALSGIGYESLDLCLEGVGIHHHVLETGNAVYGKVQHDYSTIKEKAKEMSTLSPGPIIDYHVWIGDCICQVTAVDVHGKEIMRMRFKKGAVLPIPNLVKVKLGENDTENLSSTISAAPSR	219	Viruses; Varidnaviria; Bamfordvirae; Nucleocytoviricota; Pokkesviricetes; Chitovirales; Poxviridae; Chordopoxvirinae; Orthopoxvirus; Vaccinia virus
YP_233066	YP_233066.1		hypothetical protein VACWR184 [Vaccinia virus]	Vaccinia virus	MAMFYAHALGGYDENLHAFPGISSTVANDVRKYSVVSVYNNKYDIVKDKYMWCYSQVNKRYIGALLPMFECNEYLQIGDPIHDQEGNQISIITYRHKNYYALSGIGYESLDLCLEGVGIHHHVLETGNAVYGKVQHDYSTIKEKAKEMNALSPGPIIDYHVWIGDCICQVTAVDVHGKEIMRMRFKKGAVLPIPNLVKVKLGENDTENLSSTISAAPSR	219	Viruses; Varidnaviria; Bamfordvirae; Nucleocytoviricota; Pokkesviricetes; Chitovirales; Poxviridae; Chordopoxvirinae; Orthopoxvirus
6EA6_A	6EA6_A		Chain A, Protein B2	Vaccinia virus WR	SXAXFYAHALGGYDENLHAFPGISSTVANDVRKYSVVSVYNNKYDIVKDKYXWCYSQVNKRYIGALLPXFECNEYLQIGDPIHDQEGNQISIITYRHKNYYALSGIGYESLDLCLEGVGIHHHVLETGNAVYGKVQHDYSTIKEKAKEXNALSPGPIIDYHVWIGDCICQVTAVDVHGKEIXRXRFKKGAVLPIPNLVKVKLGENDTENLSSTISAAPSR	220	Viruses; Varidnaviria; Bamfordvirae; Nucleocytoviricota; Pokkesviricetes; Chitovirales; Poxviridae; Chordopoxvirinae; Orthopoxvirus; Vaccinia virus
6EA8_A	6EA8_A		Chain A, Protein B2	Vaccinia virus WR	SMAMFYAHALGGYDENLHAFPGISSTVANDVRKYSVVSVYNNKYDIVKDKYMWCYSQVNKRYIGALLPMFECNEYLQIGDPIHDQEGNQISIITYRHKNYYALSGIGYESLDLCLEGVGIHHHVLETGNAVYGKVQHDYSTIKEKAKEMNALSPGPIIDYHVWIGDCICQVTAVDVHGKEIMRMRFKKGAVLPIPNLVKVKLGENDTENLSSTISAAPSR	220	Viruses; Varidnaviria; Bamfordvirae; Nucleocytoviricota; Pokkesviricetes; Chitovirales; Poxviridae; Chordopoxvirinae; Orthopoxvirus; Vaccinia virus
YP_009480542	YP_009480542.1		schlafen-like protein [Sea otter poxvirus]	Sea otter poxvirus	MISKYKNKHDIIIMTNTEKKFYPHFLRNSHHENLYSFPCIYANKAIDVTKFKDVVVNNKKYSVSDDCIWSYSYVGHRYYGGFLPYFTISDTDIKPKVGTIIYNTDGDEISCVTDSVGNMHTISGIGYDALDVDTSGIDVHHCIVEDGNCVYGIKQDKDYIIKQYADKKNSLSNTAITSLNVWFCKKSTQLTATYSNGKEAMRIRIKRCGILTGDYYEVDK	220	Viruses; Varidnaviria; Bamfordvirae; Nucleocytoviricota; Pokkesviricetes; Chitovirales; Poxviridae; Chordopoxvirinae; unclassified Chordopoxvirinae
YP_874245	YP_874245.1	EoNPV	p26-b [Ectropis obliqua nucleopolyhedrovirus]	Ectropis obliqua nucleopolyhedrovirus	MYINVKNVMCKVDFVQKRVNCESYNGVPLLVHIFKQYDASAEWQNLHQYPGLASSMVLPKIAASSCVQIVKFDVGTTGFTTTIHALDVKLYYVHHRYGKHFVYGLVPAIVSLQNDLELYTGAPIFNNKNNLISFVTDSFLSDINELIVPVTSESHRMQGMFCVTGCVKVFSKDDDIVDLNNGHINIFVKQWPKYVEIFVMYNGFTMSYVKLVCKFAANVLIV	222	Viruses; Baculoviridae; Alphabaculovirus
WP_143445120	WP_143445120.1		hypothetical protein [Klebsiella pneumoniae]	Klebsiella pneumoniae	MFEVNVKNVLMKVDFELKRVFCVEHNGQPLVAHVYGSHDMQPELQSLFQYPSLATSMKLPKINSESVVQLIEFRKNKKIKFVKAKLDTKLYYVHHHYGKYYMYGQVPAIVTFDAKLYNSFIGSPIFDEQYNLVSFVTDCYMNEMGQRIFPVTGESCRLHGMICLNGTVRIYGENDFVQNVLDANININVIYKKKTVEVYVIYNGDTISYVKIRSKFAGNVLIV	223	Bacteria; Proteobacteria; Gammaproteobacteria; Enterobacterales; Enterobacteriaceae; Klebsiella
YP_006607809	YP_006607809.1		p26-b [Apocheima cinerarium nucleopolyhedrovirus]	Apocheima cinerarium nucleopolyhedrovirus	MFEINVKNVLIKVDFELKRVFCVEHNGRPLVAHVYGSHDMQPELQCLYQYPSLATSMKLPKTNAENVVQLIEFNKNKKFKLVKAKLDTKLYYVHHHYGKYYMYGQVPAVVTFDSKLYNSFIGSPIFDEQDNVISFVTDCYMDDIGQRILPVTGESYRLHGMICLNGTIRIYGEDDVVQDVFDTNININIIYKKKTVEVYVMYNGETISYVKIKSKFAGNVLIV	223	Viruses; Baculoviridae; Alphabaculovirus; unclassified Alphabaculovirus
YP_008378276	YP_008378276.1		p26-b [Hemileuca sp. nucleopolyhedrovirus]	Hemileuca sp. nucleopolyhedrovirus	MESFIVNNVQFKVNFILQRVYCERYNGKKMFVHIFGDYNAHLKLESLFQYPGLATNVKLPKLNSNETVKLVTFDPIERHIKFVECRLDTKLYFAHHRYGKYYVYGQVPVVVKDRCDHIDIFTGAPIFDADDNLVSFMTDSFINNDNVQLIPVSGKSYRLQGMFCIDGVIRLYDENEIVRPIVSDHIDINVQYTKKYVEIQLIYKGNILSQLKIQCKFAGNVLIM	224	Viruses; Baculoviridae; Alphabaculovirus; Hemileuca species nucleopolyhedrovirus
YP_717599	YP_717599.1		P26 [Clanis bilineata nucleopolyhedrovirus]	Clanis bilineata nucleopolyhedrovirus	MALAQDSSIHIVNHAVFAVDHNFKRVHMISYKDEAVTTNVFLGYDITPSYESLNHYPNLVTSLTLPKLKPKALLKIPLLDDNRRLKMVNVKLSSQLYFAHHHYAKYYVYGLIPAVVLSLNSSIKNHLYTGMPIFNSKNQLVSFVTDCHIEKKCVVLVTGETHRVGGMFCIDGCVRLLVNEEILHLPPFDCIDVHVRYTKKKVRIYLVYNNQVLSNVDINALFAGNVLIR	229	Viruses; Baculoviridae; Alphabaculovirus
NP_046288	NP_046288.1		p26 [Orgyia pseudotsugata multiple nucleopolyhedrovirus]	Orgyia pseudotsugata multiple nucleopolyhedrovirus	MYIKMEVEFDEDTGALQIGGQEVFVMVFEPGQEVFDKSLDQHHQFPGVATSVVFPQLSIGTKVDVFTSSGGFGATDHHCFNYHVCNKRFVFGSVPALEIPADVREHLRIGAPITCADRLVSLVTAVHAADGAWLLRVTAARAGQVSGHARQQRRGAGRTVRAGRSVYGPVQLPYEQLKAHAFRKRRPRRDAAESCALFYNDSEVRITFNKGEFELMHWRLPGPLVSHGFK	230	Viruses; Baculoviridae; Alphabaculovirus
YP_001650972	YP_001650972.1		p26-b [Orgyia leucostigma nucleopolyhedrovirus]	Orgyia leucostigma nucleopolyhedrovirus	MQRYTINGVSFSVDFTINRVFCHKYNNNNLIAHVYGIHDDQPGLDALHQYPGLACSIKLPKINAKTEVCFVCFDSHKRLRLVKARLDTKLYFAHHHYGKYYVYGQVPAVVEFDVARAADLFVGAPVFDAVRRRLVSFVTNCHFSDNASERQKQLIVPVTGESYRLQGMFCINGGVRLYGENEVVDAGVRSDININVKYTKKQVDVFVVYNGEIISRVTVKSKFTGNVLIV	230	Viruses; Baculoviridae; Alphabaculovirus
YP_009001829	YP_009001829.1		P26 [Buzura suppressaria nucleopolyhedrovirus]	Buzura suppressaria nucleopolyhedrovirus	MKTFNINNVMLKVDFNLKRAYCESYKNKHLAVHVYGQHDYLSETSTFYQYPGIACNIKLPKLNSTSIVKLIEFKSNDSYKIITKRLDKKLYYVHHHYAKYYVYGLVPGVVLKNDDLCKLNVFNCYIGSPVFDKNDRLVSFVTDYYYMNENNIGIMPITGESYRMQGMFCLDGAVRVFDTLSFEPAAIAAEPTINIIVGYNKKHVKIAVVYNGSVVSELLIACQYAGNILIL	231	Viruses; Baculoviridae; Alphabaculovirus
AUR45051	AUR45051.1		P26 protein [Spilosoma obliqua nucleopolyhedrosis virus]	Spilosoma obliqua nucleopolyhedrosis virus	MHVQMEVKFDEDTGSLQMNDRNVFVKVFEPGQEVFDETLNQYHQFPGVATDIVFPQLSLGLTVDVFTSSGTYSGTLTTTCFNYHVCNKRFVFGVVPALEVSKEVRDHLCIGAPITCDDRLVSVVTTMYERADGVWLVPVTGVRESGQVSGHAHVRNGVRAERLRAGRSVYGTVQLPYDQLKAYALSQTAPRGEATESCMLFYNDSEVRITFNRNAFELMHWRLPGPFVVRSV	232	Viruses; Baculoviridae; Alphabaculovirus; unclassified Alphabaculovirus
AWW14419	AWW14419.1		p26 [Hyposidra talaca NPV]	Hyposidra talaca NPV	MKTFTINNVVFKVNFDLKRVYCELYNNESLAVHVYGQHDYLFESSALYQYPGIACNIKLPKLNSASTIQLIEFQGNDTYKMVTKRLDNKLYYVHHHYAKYYVYGQVPGVVLTDSDSPKLNAFNCYIGSPIFDDRNRLVSFVTDYYFPNENGITAVMPITGESYRMQGVFCLDGGVRVFDTLSLNTTTVAAEPTINILVGHNGKHVKIAVVYNGSVVSELLITCKYAGNVLIV	232	Viruses; Baculoviridae; Alphabaculovirus; unclassified Alphabaculovirus
YP_473209	YP_473209.1		P26 [Hyphantria cunea nucleopolyhedrovirus]	Hyphantria cunea nucleopolyhedrovirus	MHVQMEVKFDEDTGSLQMNDRNVFVKVFEPGQEVFDETLNQYHQFPGVATDIVFPQLSLGLTVDVFTSSGTYSGTLTTTCFNYHVCNKRFVFGVLPALEVSKEVRDHLCIGAPITCDDRLVSVVTTMYERADGVWLVPVTGVRESGQVSGHAHVRNGVRAERLRAGRSVYGTVQLPYDQLKAYALSQTAPRGEATESCMLFYNDSEVRITFNRNAFELMHWRLPGPFVVRSV	232	Viruses; Baculoviridae; Alphabaculovirus
AGR56910	AGR56910.1		P26B [Choristoneura occidentalis alphabaculovirus]	Choristoneura occidentalis alphabaculovirus	MYVKMDVIYDENTGSLQMGDKNVFIKVLEPGQEVFDETLNQYHQFPGVVTSIVFPQLLTGTTVDVFTASGAYSGPLTTTCFNYHVCNKRFVFGTVPALEVPDEVRNHLHIGAPITCDDKLVSVVTTVFRRADGVWLLPVTGVRQADQVSGHAFVQNGVRAERLGTGRSVYGTVQLPYDKLKAHALSQTAPQAEASESCALFYNDAEVRITFNKGSFELMHWRLPGPFVGHNVK	233	Viruses; Baculoviridae; Alphabaculovirus
AKR14102	AKR14102.1		p26 [Dasychira pudibunda nucleopolyhedrovirus]	Dasychira pudibunda nucleopolyhedrovirus	MYIKMEVEFDEDTGALQIGGQEVFVKVFEPGQEVFDKSLDQHHQFPGVATSVVFPQLSIGTTVDVFTSSGTYSGPLTTTCFNYHVCNKRFVFGSVPALEIPADVREHLRIGAPITCADRLVSVVTAVHRRADGAWLLPVTGVREPGQVSGHAHVSNGVRAERLRAGRSVYGPVQLPYEQLKAHALSQTAPRADAAESCALFYNDFEVRITFNKGEFELMHWRLPGPLVSHGFK	233	Viruses; Baculoviridae; Alphabaculovirus
BBU37501	BBU37501.1		P26 protein [Choristoneura diversana nucleopolyhedrovirus]	Choristoneura diversana nucleopolyhedrovirus	MYVKMDVIFDEDTGSLQMGDQNVFIQVLKPGQEVFDDTLNQYHQFPGVVTSVVFPQLSMGTTVDVFMTSGAYSGALTTTCFNYHVCNKRFVFGTVPALELPDEVRNHLHVGAPITCDGRLVSVVTTVFRRADGVWLLPVTGVRQSGQVSGHAHVRNGVRAERLSAGRSVYGTVQLPYDKLKAHALLQTAPHAEAPESCALFYNDSEVRITFNKGSFELMHWRLPGPFVGHSVK	233	Viruses; Baculoviridae; Alphabaculovirus; unclassified Alphabaculovirus
NP_848439	NP_848439.1		p26 [Choristoneura fumiferana multiple nucleopolyhedrovirus]	Choristoneura fumiferana multiple nucleopolyhedrovirus	MYVKMDVIYDENTGSLQMGDKNVFIKVLEPGQEVFDETLNQYHQFPGVVTSIVFPQLLTGTTVDVFTASGAYSGTLTTTCFNYHVCNKRFVFGTVPALEVPDEVRNHLHVGAPITCDDKLVSVVTTVFRRADGVWLLPVTGVRQADQVSGHAFVQNGVRAERLGTGRSVYGTVQLPYDKLKAHALSQTAPQAEASESCALFYNDAEVRITFNKGSFELMHWRLPGPFAGHNVK	233	Viruses; Baculoviridae; Alphabaculovirus
QEI03645	QEI03645.1		P26A [Rachiplusia nu nucleopolyhedrovirus]	Rachiplusia nu nucleopolyhedrovirus	MQVTRVNGKSVHIEVIEPHGETNGRDSLSLLHQFPGVASEVIFPPIEKEDSSLYVLLSNGVLALVKPTRIYTNFHKHQGRFIYGQLRTFVVDDFSLAEKIYIGAPIFFNKKLVSVVTCRYDDYDAGLVMFPVSGIRPPGLVSGQFHYDNNVLVSSLKSNMSVYGKHQLLYQSKYMNVKKFALTAAANRLSYRDLPRSVSVFHNAREIIITLTEGEFEIDRVRFDGPMVIPQHG	233	Viruses; Baculoviridae; Alphabaculovirus; unclassified Alphabaculovirus
YP_008378375	YP_008378375.1		P26B [Choristoneura rosaceana nucleopolyhedrovirus]	Choristoneura rosaceana nucleopolyhedrovirus	MYIKMDVIFDEDSGCLQIGDQNVFIKVLEPGQEVFDETLNQYHQFPGVITSVVFPQLSMGTTVDVFTTIGTYSGTLVTTCFNYHVCNKRFVFGTVPALEVADDMRNHLHVGAPITCDDRLVSVVTTVFRRADGVWLLPVTGVRQSGQVSGHAYVRNGVRVERLSAGRSVYGAVQLPYDKLKTHALSQTAPQAEGSESCALFYNDSEVRITFNKGSFELMHWRLPGPFAGHSVK	233	Viruses; Baculoviridae; Alphabaculovirus
YP_008992114	YP_008992114.1		p26 [Choristoneura murinana nucleopolyhedrovirus]	Choristoneura murinana nucleopolyhedrovirus	MYVKMDVIFDEDTGSLQMGDQNVFIQVLKPGQEVFDETLNQYHQFPGVVTSVVFPQLFMGTTVDVFMTSGAYSGALTTTCFNYHVCNKRFVFGTVPALELPDEVRNHLHVGAPITCDGRLVSVVTTVFRRADGVWLLPVTGVRQSGQVSGHAHVRNGVRAERLSAGRSVYGTVQLPYDKLKAHALLQTAPHAEAPESCALFYNDSEVRITFNKGSFELMHWRLPGPFVGHSVK	233	Viruses; Baculoviridae; Alphabaculovirus
ANW12286	ANW12286.1		p26 [Malacosoma sp. alphabaculovirus]	Malacosoma sp. alphabaculovirus	MAANNIFNLTITKLNSVVFSVNHLTQQVQVLTYKNEPVTFHLFGQHIGSSVNLDDKFQYPGLASSIKLPVLNRYKPLKMVVFDENNQMRVEEVKMEEKMYFAHHHYEQYYVYGQVPVVLKNNMRNKDLKVYIGSPIFNHKNALVSVVSDIYLDNQNNVIFPVSGQAGGVQGTYCLDGSVWLTHSEDSLSSFPKFSTLDLHVCYDDKNIYLYLVYEGRVLSWIKIKGRFAGNVLIC	235	Viruses; Baculoviridae; Alphabaculovirus; unclassified Alphabaculovirus
YP_009552185	YP_009552185.1		p26 [Malacosoma neustria nucleopolyhedrovirus]	Malacosoma neustria nucleopolyhedrovirus	MAANNMFNLTITKLNSVVFSVNHLTQQVQVLTYKNVPVTFHLFGQHIGSSVNLDDKFQYPGLASSIKLPVLNRYKPLKMVVFDENNQLKVEEVKMEEKMYFAHHHYEQYYVYGHVPVVLKNNMRNKDLKVYIGSPIFNHKNALVSVVSDIYLDNQNNVIFPVSGQAGGVQGTFCLDGSVWLTHSEDLLSSFPKFSTLDLHVCYDERNVYLYLVYEGKVLSWIKIKGRFAGNVLIC	235	Viruses; Baculoviridae; Alphabaculovirus; unclassified Alphabaculovirus
AFY62829	AFY62829.1		P26 [Philosamia cynthia ricini nucleopolyhedrovirus virus]	Philosamia cynthia ricini nucleopolyhedrovirus virus	MDNKMYVRMEIKFDEDTGRLQIGDRDVFVRVFEPGQEVFDETLDQYHQFPGVATDVVFPQVDTGATVSVHTAAGAYSGPLTASCFNYHVCNKRFVFGVLPALEVPADVRPHLRVGAPILYNEQLVSVVTAVHERADGVWLVPVTGVRGPHQVSEHARVCNGVRAERLRAGRSVYGAVQLPYDKLKTHALSQTEASESCALFYNDSEVRITFNKGSFELMHWRLPGPFVATALNKHY	236	Viruses; Baculoviridae; Alphabaculovirus
ALR69832	ALR69832.1		p26 [Anticarsia gemmatalis multiple nucleopolyhedrovirus]	Anticarsia gemmatalis multiple nucleopolyhedrovirus	MDNKMYVRMEIKFDEDTGRLQIGDRDVFVRVFEPGQEVFDETLDQYHQFPGVATDVVFPQLTTGATVSVHTAIGPYSGPLTVSCFNYHVCNKRFVFGVLPALEVPADVHPHLRLGAPILCGEQLVSVVTAVYERADGVWLVPVTGVREAHQVSGHARVCNGVRAERLRDGRSVYGTVQLPYNEVKAYALSQSTPAADARESCALFYNDSEVRITFSKGEFEQMHWRLPGPFVGRLV	236	Viruses; Baculoviridae; Alphabaculovirus
ALR70147	ALR70147.1		p26 [Anticarsia gemmatalis multiple nucleopolyhedrovirus]	Anticarsia gemmatalis multiple nucleopolyhedrovirus	MDNKMYVRMEIKFDEDTGRLQIGDRDVFVRVFEPGQEVFDETLDQYHQFPGVATDVVFPQLTTGATVSVHTAIGPYSGPLTVSCFNYHVCNKRFVFGVLPALEVPADVRPHLRLGAPILCDDQLVSVVTAVYERADGVWLVPVTGVRETHQVSGHARVCNGVRAERLRDGRSVYGTVQLPYNEVKAYALSQSTPAADARESCALFYNDSEVRITFSKGEFEQMHWRLPGPFVGRLG	236	Viruses; Baculoviridae; Alphabaculovirus
ALR70774	ALR70774.1		p26 [Anticarsia gemmatalis multiple nucleopolyhedrovirus]	Anticarsia gemmatalis multiple nucleopolyhedrovirus	MDNKMYVRMEIKFDEDTGRLQIGDRDVFVRVFEPGQEVFDETLDQYHQFPGVATDVVFPQLTTGATVSVHTAIGPYSGPLTVSCFNYHVCNKRFVFGVMPALEVPADVHPHLRLGAPILCGEQLVSVVTAVYERADGVWLVPVTGVREAHQVSGHARVCNGVRAERLRDGRSVYGTVQLPYNEVKAYALSQSTPAADARESCALFYNDSEVRITFSKGEFEQMHWRLPGPFVGRLV	236	Viruses; Baculoviridae; Alphabaculovirus
BBD51086	BBD51086.1		P26 [Samia ricini nucleopolyhedrovirus]	Samia ricini nucleopolyhedrovirus	MDNKMYVRMEIKFDEDTGRLQIGDRDVFVRVFEPGQEVFDETLDQYHQFPGVATDVVFPQVDTGATVSVHTAAGAYSGPLTASCFNYHVCNKRFVFGVLPALEVPADVSPHLRVGAPILCNEQLVSVVTAVHERADGVWLVPVTGVRGPHQVSGHARVCNGVRAERLRAGRSVYGAVQLPYDKLKTHALSQTEASESCALFYNDSEVRITFNKGSFELMHWRLPGPFVATALNKHY	236	Viruses; Baculoviridae
NP_932739	NP_932739.1	CfDEFNPV	hypothetical protein CFDNVgORF130 [Choristoneura fumiferana DEF multiple nucleopolyhedrovirus]	Choristoneura fumiferana DEF multiple nucleopolyhedrovirus	MDNKMYVRMEIKFDEDTGRLQIGDRDVFVRVFEPGQEVFDDSLNQYHQFPGVATDVVFPQLATGATVSVHTAAGAYTGSLTASCFNYHVCNKRFVFGVLQALEVPADVRPHLRLGAPILCDDQLVSVVTAVHKRADGVWLVPVTGVRGAHQVSGHARVRNGVRAERLCAGRSVYGTVQLPYDELKAYALSQSTPPADAQESCALFYNDSEVRITFNKGDFEQMHWRLPGPFVGRLV	236	Viruses; Baculoviridae; Alphabaculovirus
YP_803526	YP_803526.1		p26 [Anticarsia gemmatalis nucleopolyhedrovirus]	Anticarsia gemmatalis nucleopolyhedrovirus	MDNKMYVRMEIKFDEDTGRLQIGDRDVFVRVFEPGQEVFDETLDQYHQFPGVATDVVFPQLTTGATVSVHTAIGPYSGPLTVSCFNYHVCNKRFVFGVMPALEVPADVHPHLRLGAPILCGEQLVSVVTAVYERADGVWLVPVTGVREAHQVSGHARVCNGVRAERLRDGRSVYGTVQLPYNKVKAYALSQSTPAADARESCALFYNDSEVRITFSKGEFEQMHWRLPGPFVGRLV	236	Viruses; Baculoviridae; Alphabaculovirus; unclassified Alphabaculovirus
YP_009118504	YP_009118504.1	CoveMNPV	p26 [Condylorrhiza vestigialis MNPV]	Condylorrhiza vestigialis MNPV	MNNKMYVRMEVKFDEDTERLQINDRDVFVRVFEPGQEVFDDTLNQYHQFPGVATEIMFPQLAMGATVSVHTAVGAYTGPLTASCFNYHVCNKRFVFGVLPALEVPVDVCPHLRLGAPILCDDQLVSVVTAVHKRTDDVYLVPVTGVRESQQVSGHARVRNGVRVERLRAGRSVYGTVQLPYDQLKAYALSQSTPSADAQESCALFYNDSEVRITFNKGDFEEMHWRLPGPFVGRLD	236	Viruses; Baculoviridae; Alphabaculovirus; unclassified Alphabaculovirus
YP_009316042	YP_009316042.1		p26 [Anticarsia gemmatalis multiple nucleopolyhedrovirus]	Anticarsia gemmatalis multiple nucleopolyhedrovirus	MDNKMYVRMEIKFDEDTGRLQIGDRDVFVRVFEPGQEVFDETLDQYHQFPGVATDVVFPQLTTGATVSVHTAIGPYSGPLTVSCFNYHVCNKRFVFGVLPALEVPADVRPHLRLGAPILCDDQLVSVVTAVYERADGVWLVPVTGVRETHQVSGHARVCNGVRAERLRDGRSVYGTVQLPYNEVKAYALSQSTPAADARESCALFYNDSEVRITFSKGEFEQMHWRLPGPFVGRLV	236	Viruses; Baculoviridae; Alphabaculovirus
QED40584	QED40584.1		P26B [Chrysodeixis includens nucleopolyhedrovirus]	Chrysodeixis includens nucleopolyhedrovirus	MVSREGDFVPSNTVTQFGNVAFIVDHVTKRVTILSYLNEPVKFHVFSQHDSDSELLKLKYHYPGLASSVALPKLTLRQKVKLLVFDKDKNLKLVSAELEEKLFFAHHHYAKYYNYGLVPVIIKNFEESLYSGAPVFDRTGKVLLSVVCDCYYPNENYCVVPLCGETSGSRGVISLDGHVWLSETGDNFDFSNSIKVKDRIDLYVSYDDRFVYLNLFYNNHIVTYIRIRGKFAGNVLIK	238	Viruses; Baculoviridae; Alphabaculovirus
QEI03606	QEI03606.1		P26B [Rachiplusia nu nucleopolyhedrovirus]	Rachiplusia nu nucleopolyhedrovirus	MALQVGDVVLSNSVTQFSSVAFTANHESRRVTIMSYLNEPVKFHIFGQHDNDPDLLKLKYHYPGLASSLRLPKLALRQTVSVLVFDKNNCLKLVKAELEEKLHFAHHHYAKYYTYGLVPVILKNFDEALYSGSPVFDETGTQLVSVICDWYFPKNDYCVIPLCGEMSGSRGVLCLDGYVWLNELGDNFDFSNSINSKNRIDLYVSYDKKFIYLNLYYNQCIITFIRIKAKFAGNVLIR	238	Viruses; Baculoviridae; Alphabaculovirus; unclassified Alphabaculovirus
XP_013197314	XP_013197314.1		PREDICTED: uncharacterized protein LOC106140284 [Amyelois transitella]	Amyelois transitella	MSRTVRNEQYKGVVENFSIPAEIHERDGRKFASFGAVVPIHCCTSEEIAERAKTTHHYCDVFTEEKMAPLGELAYVRLDENTAEKVFINRSKKLLMVSSDGRIAQWRCAPSFESNNQFLAGTPVVNQDGALVTVVTAKKGNHYAVSTFEGEGGYFETSSLWHTIDLAEGRVAYGLHTFASREELRAHVSRLARAPAHGAPAPALFRARRPRVALVEAGGKQLAHIYLQPGIVSDVEYL	238	Eukaryota; Metazoa; Ecdysozoa; Arthropoda; Hexapoda; Insecta; Pterygota; Neoptera; Holometabola; Lepidoptera; Glossata; Ditrysia; Pyraloidea; Pyralidae; Phycitinae; Amyelois
XP_028034547	XP_028034547.1	wild silkworm	uncharacterized protein LOC114246282 isoform X2 [Bombyx mandarina]	Bombyx mandarina	MSKRTVLNENYKGIVESMSIPAEIHERNGKKYASVGSILPIHCCPPEELERRAESTHHYCGVFTDELLAPLEELAYVRLDENTAEKVFINRAKRILIVSSDGHLAQWRCAPTFESANRYIAGTPIVDQRGGVISVVVAKKNNHYAVSSFEGEGGYFESTQNWKVVEPAAGGYAYGELTFPSRTALREHVAGLRGGAGAWGDAVPVLRGGTSPRLALVLDGRQLAHYYLHNVIADVEYL	238	Eukaryota; Metazoa; Ecdysozoa; Arthropoda; Hexapoda; Insecta; Pterygota; Neoptera; Holometabola; Lepidoptera; Glossata; Ditrysia; Bombycoidea; Bombycidae; Bombycinae; Bombyx
AGE61772	AGE61772.1	ChchNPV	P26-2 protein [Chrysodeixis chalcites nucleopolyhedrovirus]	Chrysodeixis chalcites nucleopolyhedrovirus	MSIQTGDIVESNVVTQFNSVAFIVNHETRRVTIMSYKNEPVKFHVFNQHDNDPDLLKLQYHYPGLASSIELPKITHMSKVRIMVFDQRHRMIIVEEFLLEKLYFVHHHYAKYYVYGLVPVIAKNFKHNLYSGAPVFDETSKVLLSVVSDCYFSSTTDENCIIPLSGELSGSRGVLCLDGHVWLNESGDDFTFDKTNVANRIDLYVSHDKKFVYLNIFYNNNIINFIRVKAKFVGNVLIR	239	Viruses; Baculoviridae; Alphabaculovirus
YP_249667	YP_249667.1	ChchNPV	P26-2 [Chrysodeixis chalcites nucleopolyhedrovirus]	Chrysodeixis chalcites nucleopolyhedrovirus	MSIQTGDIVESNVVTQFNSVAFIVNHETRRVTIMSYKNEPVKFHVFNQHDNDPDLLKLQYHYPGLASSIELPKITHMSKVRIMVFDQRHRMIIVEEFLLEKLYFVHHHYAKYYVYGLVPVVAKNFKHNLYSGAPVFDETGKVLLSVVSDCYFSSTTDENCIIPLSGELSGSRGVLCLDGHVWLNESGDDFTFDKTNVANRIDLYVSHDKKFVYLNIFYNNNIINFIRVKAKFVGNVLIR	239	Viruses; Baculoviridae; Alphabaculovirus
YP_308949	YP_308949.1		orf59 [Trichoplusia ni single nucleopolyhedrovirus]	Trichoplusia ni single nucleopolyhedrovirus	MSIQTGETVESNVVTQFNSVAFLVNHETRRVTIMSYKNEPVKFHVFNQHDTDPDLLKLPYHYPGLASSIELPKITHMRKVRIMVFDQRHRMLLAEEFLLEKLYFVHHHYAKYYVYGLVPVVAKNFKHNLYSGAPVFDETGKVLLSVISDCYFSSTTEENCVIPLSGELSGSRGVLCLDGHVWLNETGDDFTFDKTNVPNRIDLYVSHNKKFVYLNIFYNNNIINFIRVKAKFVGNVLIR	239	Viruses; Baculoviridae; Alphabaculovirus
YP_009186747	YP_009186747.1		p26-2 [Sucra jujuba nucleopolyhedrovirus]	Sucra jujuba nucleopolyhedrovirus	MRIQVNSVSMNVNFETKMVYCDMYEGDALTVHLMAQPNISSTDVKLLHQYPGVACSTKLRRLNAGDKVKLLKFTANETFSLITTRLDRHLYFVHHRHGNLYMYGQVPAVVENQTKRKNVHAENCTTVQQHYYVGSPIFDQNNRLVSFVTDIYMDDRGISILPVTGKSRLQGRFCVTGHIRIFNDMCLTTCLNPVIQDQIYINIVVCYDNKQVKVMVIYNKTIVSEIHMCTKFAANVLIL	239	Viruses; Baculoviridae; Alphabaculovirus
AAA87588	AAA87588.1		P26 [Bombyx mori nucleopolyhedrovirus]	Bombyx mori nucleopolyhedrovirus	MELYNIKYAIDPTNKNVIEQVDNVDAFVHILEPGQEVFDETLSRYHQFPGVVSSIIFPQLVLNTIISVLSEDGSLLPLKLENTCFNFHVCNKRFVFGNLPAAIVNNETKQKLRIGSPIFAGEKLVSVVTTFHRVGENEWLLPVTGIQEASRLSGHIKVPNGVRVEKLRPNMSVYGTVQLPYDKIKRHALEQENKTPNALESCVLFYKDSEIRITYNRGDYEIMHLRMPGPLIQPNTIYYS	240	Viruses; Baculoviridae; Alphabaculovirus
AAN28082	AAN28082.1		p26 [Rachiplusia ou MNPV]	Rachiplusia ou MNPV	MELYNIKYAIDLTNKIVIKQVDNVDAFVHILEPGQEVFDETLNQYHQFPGVVSSIIFPQLVLNTIISVLSEDGSLLTLKLENTCFNFHVCNKRFVFGNLPSAVVNNETKEKLRIGAPIFADEKLVSVVTAFHRVGENEWLLPVTGIREASQLSGHIKVLNGVRVEKWRPNMSVYGTVQLPYDKIKQHALEQENKTPNALESCVLFYKDSEIRITYNKGDYEIMHLRMSGPLIQPNTIYYS	240	Viruses; Baculoviridae; Alphabaculovirus
ABE68519	ABE68519.1		p26 [Plutella xylostella multiple nucleopolyhedrovirus]	Plutella xylostella multiple nucleopolyhedrovirus	MELYNIKYAIDPTNKIVIEQVDNVDAFVHILEPGQEVFDETLSQYHQFPGVVSSIIFPQLVLNTIISVLSEDGSLLTLKLENSCFNFHVCNKRFVFGNLPAAVVNNETKQKLRIGAPIFAGEKLVSVVTAFHRVGENEWLLPVTGIREASQLSGHMKVLNGVRVEKWRPNMSVYGTVQLPYDKIKQHALEQENKTPNALESCVLFYKDSEIRITYNKGDYEIMHLRMPGPLIQPNTIYYS	240	Viruses; Baculoviridae; Alphabaculovirus
ACQ57310	ACQ57310.1		P26 [Bombyx mandarina nucleopolyhedrovirus]	Bombyx mandarina nucleopolyhedrovirus	MELYNIKYAIDPTNKIVIEQVDNVDAFVHILEPGQEVFDETLSRYHQFPGVVSSIIFPQLVLNTIISVLSEDGSLLALKLENTCFNFHVCNKRFVFGNLPAAIVNNETKQKLRIGSPIFAGEKLVSVVTTFHRVGENEWLLPVTGIQEASRLSGHIKVPNGVRVEKLRPNMSVYGTVQLPYDKIKRYALEQENKTPNALESCVLFYRDSEIRITYNRGDYEIMHLRMPGPLIQPNTIYYS	240	Viruses; Baculoviridae; Alphabaculovirus
AFN09041	AFN09041.1		P26 [Bombyx mori nucleopolyhedrovirus]	Bombyx mori nucleopolyhedrovirus	MELYNIKYAIDPTNKIVIEQVDNVDAFVHILEPGQEVFDETLSRYHQFPGVVSSIIFPQLVLNTIISVLSEDGSLLPLKLENTCFNFHVCNKRFVFGNLPAAIVNNETKQKLRIGSPIFAGEKLVSVVTTFHRVGENEWLLPVTGIQEASRMSGHIKVPNGVRVEKLRPNMSVYGTVQLPYDKIKRHALEQENKTPNALESCVLFYKDSEIRITYNRGDYEIMHLRMPGPLIQPNTIYYS	240	Viruses; Baculoviridae; Alphabaculovirus
AFN21092	AFN21092.1		P26 [Bombyx mori nucleopolyhedrovirus]	Bombyx mori nucleopolyhedrovirus	MELYNIKYAIDPTNKIVIEQVDNVDAFVHILEPGQEVFDETLSRYHQFPGVVSSIIFPQLVLNTIISVLSEDGSLLALKLENTCFNFHVCNKRFVFGNLPAAIVNNETKQKLRIGSPIFAGEKLVSVVTTFHRVGENEWLLPVTGIQEASRLSGHIKVPNGVRVEKLRPNMSVYGTVQLPYDKIKRHALEQENKTPNALESCVLFYKDSEIRITYNRGDYEIMHLRMPGPLIQPNTIYYS	240	Viruses; Baculoviridae; Alphabaculovirus
AFN21230	AFN21230.1		P26 [Bombyx mori nucleopolyhedrovirus]	Bombyx mori nucleopolyhedrovirus	MELYNIKYAIDPTNKIVIEQVDNVDAFVHILEPGQEVFDETLSRYHQFPGVVSSIIFPQLVLNTIISVLSEDGSLLPLKLENTCFNFHVCNKRFVFGNLPAAIVNNETKQKLRIGSPIFAGEKLVSVVTTFHRVGENEWLLPVTGIQEASRLSGHIKVPNGVRVEKLRPNMSVYGTVQLPYDKIKRHALEQENKTPNALESCVLFYKDSEIRITYNRGDYEIMHLRMPGPLIQPNTIYYS	240	Viruses; Baculoviridae; Alphabaculovirus
AGX01339	AGX01339.1		P26 [Bombyx mori nucleopolyhedrovirus]	Bombyx mori nucleopolyhedrovirus	MELYNIKYAIDPTNKIVIEQVDNVDAFVHILEPGQEVFDETLSRYHQFPGVVSSIIFPQLVLNTIISVLSEDGSLLPLKLENTCFNFHVCNKRFVFGNLPAAIVNNETKQKLRIGSPIFAGEKLVSVVTTFHRVGENEWLLPVTGIQEASRLSGHIKVPNGVRVEKLRPNMSVYGTVQLPYDKIKRYALEQENKTPNALESCVLFYRDSEIRITYNRGDYEIMHLRMPGPLIQPNTIYYS	240	Viruses; Baculoviridae; Alphabaculovirus
AIS92852	AIS92852.1		P26 [Bombyx mori nucleopolyhedrovirus]	Bombyx mori nucleopolyhedrovirus	MELYNIKYAIDPTNKIVIEQVDNVDAFVHILEPGQEVFDETLSRYHQFPGVVSSIIFPQLVLNTIISVLSEDGSLLPLKLENTCFNFHVCNKRFVFGNLPAAIVNNETKQKLRIGSPIFAGEKLVSVVTTFHRVGENEWLLPVTGIQEASRLSGHIKVPNGVRVEKLRPNMSVYGTVQLPYDKIKRYALEQENKTPNVLESCVLFYRDSEIRITYNRGDYEIMHLRMPGPLIQPNTIYYS	240	Viruses; Baculoviridae; Alphabaculovirus
BBD51235	BBD51235.1		P26 [Samia ricini nucleopolyhedrovirus]	Samia ricini nucleopolyhedrovirus	MDNKMYVRMEIKFDEDTGRLQIGDRDVFVRVFEPGQEVFDETLDQYHQFPGVATDVVFPQVDTGATVSVHTAAGAYSGPLTASCFNYHVCNKRFVFGVLPALEVPADVRPHLRVGAPILYNEQLVSVVTAVHERADGAWLVPVTGVRGPHQVSGHARVCNGVRAERLRAGRSVYGAVQLPYDKLKTHALSQTAPHAEASESCALFYNDSEVRITFNKGSFELMHWRLPGPFVATALNKHY	240	Viruses; Baculoviridae
BBN66165	BBN66165.1		p26 [Bombyx mori nucleopolyhedrovirus]	Bombyx mori nucleopolyhedrovirus	MELYNIKYAIDPTNKIVIEQVDNVDAFVHILEPGQEVFDETLSRYHQFPGVVSSIIFPQLVLNTIISVLSEDGSLLPLKLENTCFNFHVCNKRFVFGNLPAAIVNNETKQKLRIGSPIFAGEKLVSVVTTFHRVGENEWLLPVTGIQEASRMSGHIKVPNGVRVEKLRPNMSVYGTVQLPYDKIKRHALEQENKTPNALESCVLFYRDSEIRITYNRGDYEIMHLRMPGPLIQPNTIYYS	240	Viruses; Baculoviridae; Alphabaculovirus
NP_047534	NP_047534.1		P26 [Bombyx mori nucleopolyhedrovirus]	Bombyx mori nucleopolyhedrovirus	MELYNIKYAIDPTNKIVIEQVDNVDAFVHILEPGQEVFDETLSRYHQFPGVVSSIIFTQLVLNTIISVLSEDGSLLPLKLENTCFNFHVCNKRFVFGNLPAAIVNNETKQKLRIGSPIFAGEKLVSVVTTFHRVGENEWLLPVTGIQEASRLSGHIKVPNGVRVEKLRPNMSVYGTVQLPYDKIKRHALEQENKTPNALESCVLFYRDSEIRITYNRGDYEIMHLRMPGPLIQPNTIYYS	240	Viruses; Baculoviridae; Alphabaculovirus
NP_054166	NP_054166.1		hypothetical protein ACNVgp137 [Autographa californica nucleopolyhedrovirus]	Autographa californica nucleopolyhedrovirus	MELYNIKYAIDPTNKIVIEQVDNVDAFVHILEPGQEVFDETLSQYHQFPGVVSSIIFPQLVLNTIISVLSEDGSLLTLKLENTCFNFHVCNKRFVFGNLPAAVVNNETKQKLRIGAPIFAGKKLVSVVTAFHRVGENEWLLPVTGIREASQLSGHMKVLNGVRVEKWRPNMSVYGTVQLPYDKIKQHALEQENKTPNALESCVLFYKDSEIRITYNKGDYEIMHLRMPGPLIQPNTIYYS	240	Viruses; Baculoviridae; Alphabaculovirus
QCF61063	QCF61063.1		p26 [Troides aeacus nucleopolyhedrovirus]	Troides aeacus nucleopolyhedrovirus	MELYNIKYAIDPTNKIVIEQVDNVEAFVHILKPGQEVFDETLSQYHQFPGVVSSIIFPQLVLNTIISVLSEDGSLLTLKLENTCFNFHVCNKRFVFGNLPAAVVNNETMQKMRIGSPIFAGEKLVSVVTAFHRVGENECLLPVTGIREASQLSGHMKVLNGVRVKKWRPNMSVYGTVQLPYDKIKQHVLEQENKTRNALESCVLFYKDSEIRITYNKGDYEIMHLRMPGPLIQPNTIYYS	240	Viruses; Baculoviridae; Alphabaculovirus; unclassified Alphabaculovirus
XP_011565911	XP_011565911.1	diamondback moth	PREDICTED: uncharacterized protein LOC105395651 isoform X2 [Plutella xylostella]	Plutella xylostella	MAQRTVLNDNYKGLVESVSIPAVVEERDGKKFARSSSVVPIHCCTPDEISAYAPKTHHYCDVFTEEVLAPLEELAFVRLDQNTAEKVFINRKKRILLTSSDGALAQWRCAPTFESSNQYIAGAPIVNKEGALISVVTARVGNHYAVSSFEGDGGYFETPQPWKILDSSTGLIYGDRVFPTHEALKDFIATLGPAALGPDRPPTPVLVRGANPRVAFITKEGRQIAHNYLQGVISKGVEYL	240	Eukaryota; Metazoa; Ecdysozoa; Arthropoda; Hexapoda; Insecta; Pterygota; Neoptera; Holometabola; Lepidoptera; Glossata; Ditrysia; Yponomeutoidea; Plutellidae; Plutella
XP_023942000	XP_023942000.1	squinting bush brown	uncharacterized protein LOC112048622 [Bicyclus anynana]	Bicyclus anynana	MSKRTVTNDVYKGLVEAFSIPAELHERDGKPFASVGSVLPIHCATPQQLAERAETTHHYCDVFTDEILAPLGELAYVRIDENVAEKVFLNRSKRILLISSDGKLAQWRCAPTFESANSFVAGAPIVNKDGALVSVVTARRGNNYAVSAFEGDGGYFATTKHWEVVELEDGKLYYADKSFSTREDLAAYLQALPPVEVNTEALPKPVLLNGKSPRIALVAENGRQLSHHYLCGVFSDVEYL	240	Eukaryota; Metazoa; Ecdysozoa; Arthropoda; Hexapoda; Insecta; Pterygota; Neoptera; Holometabola; Lepidoptera; Glossata; Ditrysia; Papilionoidea; Nymphalidae; Satyrinae; Satyrini; Mycalesina; Bicyclus
XP_026730202	XP_026730202.1	cabbage looper	uncharacterized protein LOC113495595 isoform X2 [Trichoplusia ni]	Trichoplusia ni	MGRTVLNESNKGLVENFSIPAELHERDGKRFASFGTTVPIHCCTPEQVAEFANKTHHYCDVFTEQVLAPLDELVYVRIDENTAEKVFINRSKRILLVSSDGVLAQWRSAPTFESSNRFLAGTPIVNKDGDLVSVVTARKGNHYAVSTFEGEGGYFETSQPWKVLDPPEGAAVYGDRWFPSREEVRAYTLSLPGAAVSAGSPPAPVLHRGGSGRLVLADARGRQLSHHYLHGVATTDVQYL	240	Eukaryota; Metazoa; Ecdysozoa; Arthropoda; Hexapoda; Insecta; Pterygota; Neoptera; Holometabola; Lepidoptera; Glossata; Ditrysia; Noctuoidea; Noctuidae; Plusiinae; Trichoplusia
YP_610991	YP_610991.1	AnpeNPV	p26 [Antheraea pernyi nucleopolyhedrovirus]	Antheraea pernyi nucleopolyhedrovirus	MDNKMYVRMEIKFDEDTGRLQIGDRDVFVRVFEPGQEVFDETLDQYHQFPGVATDVVFPQVDTGATVSVHTAAGAYSGPLTASCFNYHVCNKRFVFGVLPALEVPADVSPHLRVGAPILCNEQLVSVVTAVHERADGVWLVPVTGVRGPHQVSGHARVCNGVRAERLRAGRSVYGAVQLPYDKLKTHALSQTAPHAEASESCALFYNDSEVRITFNKGSFELMHWRLPGPFVATALNKHY	240	Viruses; Baculoviridae; Alphabaculovirus
YP_950834	YP_950834.1		P26 [Maruca vitrata nucleopolyhedrovirus]	Maruca vitrata nucleopolyhedrovirus	MELYNIKYAIDPTNKIVIEQVDNVNVFVRTLEPGQEVFNETLSQYHQFPGVISSIIFPQVELNDEISVLTDDGSLLKLKLECTGFNFHVCNKRFVFGNLPAAVVNCETKQKLRIGAPIFANEKLISVVTAFHHVCENEWLLPVTGIREMSQMSGHMKAPNGVRVEKWRPGTSVYGTVQLPYDKIKQYALEQENKMPNTLESCVIFFKDSEVRITYNKGEYEIMQLRVPGPLIQPNSAYYD	240	Viruses; Baculoviridae; Alphabaculovirus
AAL17705	AAL17705.1		P26 [Anticarsia gemmatalis nucleopolyhedrovirus]	Anticarsia gemmatalis nucleopolyhedrovirus	MDNKMYVRMEIKFDEDTGRLQIGDRDVFVRVFEPGQEVFDETLDQYHQFPGVATDVVFPQLTTGATVSVHTAIGPYSGPLTVSCFNYHVCNKRFVFGVMPALEVPADVHPHLRLGAPILCGEQLVSVVTAVYERADGVWLVPVTGVREAHQVSGHARVCNGVRAERLRDGRSVYGTVQLPYNKVKAYALSQSTPAADARESCALFYNDSEVRITFSKGEFEQMHWRLPGLFCGSFGIIKHY	241	Viruses; Baculoviridae; Alphabaculovirus; unclassified Alphabaculovirus
XP_013143927	XP_013143927.1	common Mormon	PREDICTED: uncharacterized protein LOC106107572 isoform X3 [Papilio polytes]	Papilio polytes	MSKRTVLNEVYKGLVESMSIPAEVHHRNGKKYASFGTVVPIHCCTPEQVKERVNDTHHYCDVFTEELLAPLGELAFVRLDENTAEKVFINRSKRVLMVSSDGRLAQWRCAPTFESANHYIAGTPIVNKEGALVSVVTAKRGNHYAVSNFEGEGGYFETSLPWEIVHPMQGEVIYGEQTFSSRDELRKHLANLSPAEVTSDLPVRPVLLTGVTPRLTLITHNGRQLAHYYLYGVHASDVQYL	241	Eukaryota; Metazoa; Ecdysozoa; Arthropoda; Hexapoda; Insecta; Pterygota; Neoptera; Holometabola; Lepidoptera; Glossata; Ditrysia; Papilionoidea; Papilionidae; Papilioninae; Papilio
XP_013167996	XP_013167996.1	Asian swallowtail	PREDICTED: uncharacterized protein LOC106117995 [Papilio xuthus]	Papilio xuthus	MSKRTVLNEIYKGLVESICIPAELHHKNGKRYASFGTVVPIHCCTPEEVKERVNNTHHYCDVFAEELLAPLGELAFVRLDENTAEKVFINRSKRVLIVSSDGRLAQWRCAPTFESANHYIAGTPIVNKEGALVSVVTAKRGNHYAVSNFEGEGGYFETTLPWEMVHPMQGEVIYGDQTFSSRDELRKHLANLSPAEVTSDLPVRPVLLTGVTPRITLITHNGRQLAHYYLYGVHASDVQYL	241	Eukaryota; Metazoa; Ecdysozoa; Arthropoda; Hexapoda; Insecta; Pterygota; Neoptera; Holometabola; Lepidoptera; Glossata; Ditrysia; Papilionoidea; Papilionidae; Papilioninae; Papilio
XP_014360733	XP_014360733.1	common yellow swallowtail	PREDICTED: uncharacterized protein LOC106712630 isoform X2 [Papilio machaon]	Papilio machaon	MSKRTVLNEVYKGLVESMCIPAELHHRNSKRYASFGTVVPIHCCTPEEVKERVNNTHHYCDVFTEELLAPLGELAFVRLDENTAEKVFINRSKRVLMVSSDGRLAQWRCAPTFESANHYIAGTPIVNKEGALVSVVTAKRGNHYAVSNFEGEGGYFETSLPWETVHPMQGEVIYGDQTFSSRDELRKHLTNLSPAEVTSDLPVRPVLLTGATPRLTLITHNGRQLAHYYLYGVHASDVQYL	241	Eukaryota; Metazoa; Ecdysozoa; Arthropoda; Hexapoda; Insecta; Pterygota; Neoptera; Holometabola; Lepidoptera; Glossata; Ditrysia; Papilionoidea; Papilionidae; Papilioninae; Papilio
XP_026488588	XP_026488588.1		uncharacterized protein LOC113395234 [Vanessa tameamea]	Vanessa tameamea	MTKRTVLNEVYKGLVEEMHIPADLHERDGKKFASFGSVLPIHCATPEQVEQMSRNTHHYCDVFTPDLLAPLDDLAFVRLDENTAEKVFLNRSKRILLVSSDGRLAQWRSAPSFESANRYVGGAPLVTRAGALASVLTARLGHHYAVSAFEGDSGYFETSKPWETVDIEEGKFYYGDKGFDTREELTHYLENLPPAEVNSTTPPRPILLRGKTPRVVLMAENGRQLSHHYLCGVLANDVEYL	241	Eukaryota; Metazoa; Ecdysozoa; Arthropoda; Hexapoda; Insecta; Pterygota; Neoptera; Holometabola; Lepidoptera; Glossata; Ditrysia; Papilionoidea; Nymphalidae; Nymphalinae; Vanessa
XP_028161014	XP_028161014.1	Asian corn borer	uncharacterized protein LOC114353284 isoform X6 [Ostrinia furnacalis]	Ostrinia furnacalis	MSKRTVLNEQYKGLVEAMAIPAELHERDGKRLASFGAVLPIHCAAPEQVEQLANTTHHYCDVFTDELLAPLGELAYVRIDENTAEKVFINRSKRILLISSDGQMAQWRCAATFESANQFLAGTPIVNKDGALVSVVTAKRGNNYAVSTFEGEGGYFETSEPWEVIDAPASGLIYGTQAFANREALRQHLLSLPAALVDASSPARPALLRGAHARIVLVARNGRQIAHHYLQGVLTNDIDYL	241	Eukaryota; Metazoa; Ecdysozoa; Arthropoda; Hexapoda; Insecta; Pterygota; Neoptera; Holometabola; Lepidoptera; Glossata; Ditrysia; Pyraloidea; Crambidae; Pyraustinae; Ostrinia
XP_028161015	XP_028161015.1	Asian corn borer	uncharacterized protein LOC114353284 isoform X7 [Ostrinia furnacalis]	Ostrinia furnacalis	MSKRTVLNEQYKGLVEAMAIPAELHERDGKRFASFGAVLPIHCAAPEQVEQLANTTHHYCDVFTDELLAPLGELAYVRIDENTAEKVFINRSKRILLISSDGQMAQWRCAATFESANQFLAGTPIVNKDGALVSVVTAKRGNNYAVSTFEGEGGYFETSEPWEVIDAPASGLIYGTQAFANREALRQHLLSLPAALVDASSPARPALLRGAHARIVLVARNGRQIAHHYLQGVLTNDIDYL	241	Eukaryota; Metazoa; Ecdysozoa; Arthropoda; Hexapoda; Insecta; Pterygota; Neoptera; Holometabola; Lepidoptera; Glossata; Ditrysia; Pyraloidea; Crambidae; Pyraustinae; Ostrinia
XP_030032408	XP_030032408.1	tobacco hornworm	poxin-like [Manduca sexta]	Manduca sexta	MSKRTVLNENYKGLVENFSIPAEVHERDGKKYASFGEVVPIHCCTPEEVEAREKTTHHYCDIFTERALAPLGELAYVRLDENTAEKVFINRSKRLLVVSHDGALAQWRAAPSFESANVFVAGSPIVNKDGELVSVVTAKRGNHYAVSNFEGEGGYFATTNPWTIINTPEGASIYGDRSFNTRAEVREYIASLPPPEVSVLLPPKPVLHTGHSSRLALVTHNGVQLAHFYLHGVIVNNIEYL	241	Eukaryota; Metazoa; Arthropoda; Hexapoda; Insecta; Pterygota; Neoptera; Endopterygota; Lepidoptera; Glossata; Ditrysia; Bombycoidea; Sphingidae; Sphinginae; Sphingini; Manduca
XP_032527851	XP_032527851.1		poxin-like [Danaus plexippus plexippus]	Danaus plexippus plexippus	MMKSTALNEKYYGLVENVTIPASLHEYNGKPYSKVGNAMPIHCATQEEKELLSRTTHHYCDLFTDKLFAPLEELVFVRLDENKAEKVFLNRHKRLFLTSSDGVVASWRCAPTLESLNKFMAGTPLVGRDGRVVSLLTAKHGNHYAVSHLEGDGGYFETSKPWEIKDMEDGRLYYGNKSFNSRDELRAYIQNLPPLEVDSSAPPQPILLRGKNPRIILVAENGRQISHQYISSNLITDVEYL	241	Eukaryota; Metazoa; Ecdysozoa; Arthropoda; Hexapoda; Insecta; Pterygota; Neoptera; Holometabola; Lepidoptera; Glossata; Ditrysia; Papilionoidea; Nymphalidae; Danainae; Danaini; Danaina; Danaus; Danaus
NP_203288	NP_203288.1		P26 [Epiphyas postvittana nucleopolyhedrovirus]	Epiphyas postvittana nucleopolyhedrovirus	MVNTVVQEQKYLKMDTEITFEKETGILRMGNKELFVHVFKPGQEVFDETLNKYHQFPGVATDVIFPSIQLNKSELTVFTTSGSYTGIPNAKCFNFHVCNKRFVFGVLPALKVPADVGEHFSIGAPITCNNKLVSVVTALHKQLDGSYLVPVTGVRETSLVSGHAHVRNGVRTERWLADRAIYGTMQLPYNQIKAYAMAQVAPPADALDSCVLFYNNSEVRITFNKGNFELHHWRVPGPMCGF	242	Viruses; Baculoviridae; Alphabaculovirus
YP_009165662	YP_009165662.1		P26-2 [Perigonia lusca single nucleopolyhedrovirus]	Perigonia lusca single nucleopolyhedrovirus	MASNTIQRLGENQYKVRDCVFCVDYNFRRIQTISYKDKPVTNHVFIQHNSDPGLQQYHHYPNLATTLSLPKLHTESLVEVIMVNYNGSGDDKTIMLNEIKLSKRLYFVHHHYGKYYRYGQVPAIVLPAENKNRSTLFVGAPIFQNDNIVSFITDCYLNTEQSVYIMPVTGPSYRVDGVLTIDGIVRVIKKEDYTTIKLPTVSRIDVHVVYDKKTVTINTVYEGVILSFMLITAVFAGNLLII	242	Viruses; Baculoviridae; Alphabaculovirus; Perigonia lusca nucleopolyhedrovirus
AYN45036	AYN45036.1		p26a [Spodoptera exigua multiple nucleopolyhedrovirus]	Spodoptera exigua multiple nucleopolyhedrovirus	MSTPIDSVAEFGGDNMLQIKHVSLTINHAIRRINVLSHKNCTTRIHVFGQHDTASDFETIKYHYPGVASDVKFAKLKRNTFVNIMLIDSNRRPYLRRMKLQDHLYFIHHHYSKYYVYGQVPAVMQKTNISEFISQLYVCAPIFSDDGELISVLTDYHVNDDNCCVLPITGDAGGVKGTLCLDGFVYVYDPNDDLTKHVLQIVPRIDVYVTFDKKNVYINVVYNGETISKMYIRTLFAANVLII	243	Viruses; Baculoviridae; Alphabaculovirus
QAT90369	QAT90369.1		P26 [Spodoptera exempta nucleopolyhedrovirus]	Spodoptera exempta nucleopolyhedrovirus	MSTQIDSVALCDAPIVKHIKHVTFTINHTIRRITVLSRKDSTVRIHVFGQHDTASDYETIKYHYPGVASDVKFAKLKRNTFVNIMLIDSNHRPYLRRMKLQDHLYFMHHHYAKYYVYGQVPAVMQKTNVSEFLSQLYVCAPIFSDDGELISVVTDYYVNDDNHCVLPITGDAGGVRGSLCLDGFVYVSDPKDKLTEHVLQIVPRIDVYVTFDKKNVYINVIYNGETISKMCIRTLFAANVLII	243	Viruses; Baculoviridae; Alphabaculovirus; unclassified Alphabaculovirus
AXU41465	AXU41465.1	MyunNPV	P26 [Mythimna unipuncta nucleopolyhedrovirus]	Mythimna unipuncta nucleopolyhedrovirus	MDSLLICHNDRFMQVRKTPEFNIKVFTPLSSTRVSPDDDELDRLHHFPGVATTLVFPFVDTDQVLYVLLSDLTLERVHIIDDAHEPLFNFHVHKNRVVYGQLRSFEAPDRNVASKIYVGAPIFNDASRSEIVSVVTARCALPDLRFPVTGVRSNGLVSGQVEIDGEYVIQKQITANTSVYGRMISTYDEIKKFAINCNKNKGLYRNEPRAFVVTEGNNTITIALVENQFEIFRVRMNGSLVAHA	244	Viruses; Baculoviridae; Alphabaculovirus
NP_613192	NP_613192.1		p26 [Mamestra configurata nucleopolyhedrovirus A]	Mamestra configurata nucleopolyhedrovirus A	MSSSIKTDDESGRANVVEEIKHVTYSVNHLVRRVNIISSGDRDGRVHVFGQHDVAPEFEAIKYHYPNVASDWKFPRLQRNTYINVLLFNSMHKAYLRRMKLQDKLYYAHHHYAKYYVYGQVPAVLQKTDISEFMQQLYVSAPIFDDAGHLVSVVSDYYVDSNNQCVLPITGEGNGVQGTFSIDGFVYVTDPEDFLTRHIIQIVPRIDVYVTFDKKNVFINLLYNGVTLSKLRIRTQFAANVLIL	244	Viruses; Baculoviridae; Alphabaculovirus
NP_689282	NP_689282.1		putative P26 [Mamestra configurata nucleopolyhedrovirus B]	Mamestra configurata nucleopolyhedrovirus B	MSSSIKTDDESGRANVVEQMKHVTYSVNHLVRRVNIISSADRDVRVHVFGQHDVAPEFETIKYHYPNVASDWKFPRLQRNTYINVLLFNSMHKAYLRRMKLQDKLYYVHHHYAKYYVYGQVPAVLQKTDISEFMQQLYVSAPIFDDAGHLVSVVSDYYVDNNNQCVLPITGEGNGVQGTFSIDGFVYVTDPEDFLTRHIIQIVPRIDVYVTFDKKNVFINLLYNGVTLSKLRIRTQFAANVLIL	244	Viruses; Baculoviridae; Alphabaculovirus
QGX02354	QGX02354.1		p26a [Mamestra configurata nucleopolyhedrovirus A]	Mamestra configurata nucleopolyhedrovirus A	MSSSIKTDDESGRANVVEEMKHVTYSVNHLVRRVNIISSGDRDIRVHVFGQHDVAPEFEAIKYHYPNVASDWKFPRLQRNTYINVLLFNSMHKAYLRRMKLQDKLYYAHHHYAKYYVYGQVPAVLQKTDISEFMQQLYVSAPIFDDAGHLVSVVSDYYVDSNNQCVLPITGEGNGVQGTFSIDGFVYVTDPEDFLTQHIIQIVPRIDVYVTFDKKNVFVNLLYNGVTLSKLRIRTQFAANVLIL	244	Viruses; Baculoviridae; Alphabaculovirus
QHB21724	QHB21724.1		P26-2 [Euproctis digramma nucleopolyhedrovirus]	Euproctis digramma nucleopolyhedrovirus	MNIFMVNDMLMEVDFNFRRVRCVKYKNCPIFVQVHNVQSSLNETDCLPPVVHQYPNLSCSLKLPKTNANTLVKFVHFNEKNKTIRLESVKLDSSLYYTHHRKNNIYLFGLVPAAVYNYDKLNSLTKSVFIGSPIFDSNNKLLSFVTDHYLDVNSEKSDVVPKEILPVVGESYRLQSFFCLTGQVRIYNETDEVARNVVGINESSKIDINVVVCKNQVEVFIVYEGNTISYVKVKCKFAGSLLIV	244	Viruses; Baculoviridae; Alphabaculovirus; unclassified Alphabaculovirus
VVC88292	VVC88292.1		unnamed protein product, partial [Leptidea sinapis]	Leptidea sinapis	MSKRTVLNEDYKGLVEWFPIPAELHEADGRRFASFGSVLPIHCCTPQQIEERSKTTHHYCGVFTDDPLRDPHSELVYVRLDEDSAEKVFLNRSKRILLLSSDGRVAQWQSAPTFESSNTFVAGAPIVSQDGQLVSVVTARRGNHYAVSTFESEGGYFETSQPWEVRDMQEGGLHYADHVFLSREPLRAHVAALPPPGDDAGAPPRPLLLRGPGGGGRVLLVAGSGRQLALIYLASVFTDDIQYL	244	Eukaryota; Metazoa; Ecdysozoa; Arthropoda; Hexapoda; Insecta; Pterygota; Neoptera; Holometabola; Lepidoptera; Glossata; Ditrysia; Papilionoidea; Pieridae; Dismorphiinae; Leptidea
YP_529764	YP_529764.1		P26 [Agrotis segetum nucleopolyhedrovirus A]	Agrotis segetum nucleopolyhedrovirus A	MSTRINQVEQDSTRLCVSRVKSISYTVNHVVKRVCVLSEKNTAVRVHVFGQHDTSANFENIKYHYPGVASDIKFAKLRRNTFVNIMLFNSEKRPYLRRMRLQDQLYYSHHHYAKYYVYGQVPAVMQKTDVSKFMGQLYVSAPIFDDSGKLISVVTDYYINDKNECVVPVSGDAGGTQGMLCIDGFVYVTDPEDTISYHNIQIVPRIDVYVSFDKKNVYINLMYNGVTISKLRIRTQFAANVLIL	244	Viruses; Baculoviridae; Alphabaculovirus
YP_009011164	YP_009011164.1		p26 [Mamestra brassicae multiple nucleopolyhedrovirus]	Mamestra brassicae multiple nucleopolyhedrovirus	MSSSIKTDDESGRPNVVEQMKHVTYSVNHLVRRVNIISSADRDVRVHVFGQHDVVPEFETIKYHYPNVASDWKFPRLQRNTYINVLLFNSMHKAYLRRMKLQDKLYYVHHHYAKYYVYGQVPAVLQKTDISEFMQQLYVSAPIFDDAGHLVSVVSDYYVDNNNQCVLPITGEGNGVQGTFSIDGFVYVTDPEDFLTRHIIQIVPRIDVYVTFDKKNVFINLLYNGVTLSKLRIRTQFAANVLIL	244	Viruses; Baculoviridae; Alphabaculovirus
YP_009049890	YP_009049890.1		p26 [Peridroma alphabaculovirus]	Peridroma alphabaculovirus	MSSCIVLDGGAAVAAANMRIKSIVYTVDHAARRVHLLSDHDRPVRVHVFGQHDTAAEFETYKHHYPGVASDVKFTRLRRHSYVNVMLFDAEKRPYLRRMRIQDRLYYTHHHYGKYYVYGQVPAVMQKTNATGFVSQLYVSAPIFDDAGALVSVISDFYIDSDNNCVLPISGDAGGVQGRFCLDGFVYITDPDKCLRGIAMQTVARIDVYVAFDKKHVYVNLMYNGQVLSKIRIRTLFAANVLIL	244	Viruses; Baculoviridae; Alphabaculovirus; unclassified Alphabaculovirus
AAX78497	AAX78497.1		unknown [synthetic construct]	synthetic construct	MGHHHHHHHHHHSSGHIDDDDKHMLEMAMFYAHALGGYDENLHAFPGISSTVANDVRKYSVVSVYNNKYDIVKDKYMWCYSQVNKRYIGALLPMFECNEYLQIGDPIHDQEGNQISIITYRHKNYYALSGIGYESLDLCLEGVGIHHHVLETGNAVYGKVQHDYSTIKEKAKEMNALSPGPIIDYHVWIGDCICQVTAVDVHGKEIMRMRFKKGAVLPIPNLVKVKLGENDTENLSSTISAAPSR	245	other sequences; artificial sequences
AOL56498	AOL56498.1		P26b [Chrysodeixis includens nucleopolyhedrovirus]	Chrysodeixis includens nucleopolyhedrovirus	MIIRIEMSIQTGDIVESSVVTQFNSVAFIVNHETRRVTIMSYKNEPVKFHVFNQHDTDPELMKLQYHYPGLASSIELPKITHMRKVRLMVFDQRHRMLLAEEFLLEKLYFVHHHYAKYYVYGLVPVVVKNFRHNLYIGAPVFDETGKVLLSVVSDCYFSSTTEENCVIPLSGELSGSRGVLCLDGHVWLNETGDDFTFDKTNVPNRIDLYISHDKKFIYLNVFYNNYIINFIRVKAKFVGNVLIR	245	Viruses; Baculoviridae; Alphabaculovirus
XP_014360732	XP_014360732.1	common yellow swallowtail	PREDICTED: uncharacterized protein LOC106712630 isoform X1 [Papilio machaon]	Papilio machaon	MCTTMSKRTVLNEVYKGLVESMCIPAELHHRNSKRYASFGTVVPIHCCTPEEVKERVNNTHHYCDVFTEELLAPLGELAFVRLDENTAEKVFINRSKRVLMVSSDGRLAQWRCAPTFESANHYIAGTPIVNKEGALVSVVTAKRGNHYAVSNFEGEGGYFETSLPWETVHPMQGEVIYGDQTFSSRDELRKHLTNLSPAEVTSDLPVRPVLLTGATPRLTLITHNGRQLAHYYLYGVHASDVQYL	245	Eukaryota; Metazoa; Ecdysozoa; Arthropoda; Hexapoda; Insecta; Pterygota; Neoptera; Holometabola; Lepidoptera; Glossata; Ditrysia; Papilionoidea; Papilionidae; Papilioninae; Papilio
YP_009116975	YP_009116975.1	PsinSNPV-IE	P26b [Pseudoplusia includens SNPV IE]	Pseudoplusia includens SNPV IE	MIIRIEMSIQTGDIVESSVVTQFNSVAFIVNHETRRVTIMSYKNEPVKFHVFNQHDTDPELMKLQYHYPGLASSIELPKITHMRKVRLMVFDQRHRMLLAEEFLLENLYFVHHHYAKYYVYGLVPVVVKNFRHNLYIGAPGFDETGKVLLSVVSDCYFSSTTEENCVIPLSGELSGSRGVLCLDGHVWLNETGDDFTFDKTNVPNRIEFVYFARQKFIYLNVFYNNYIINFIRVKAKFVGNVLIR	245	Viruses; Baculoviridae; Alphabaculovirus
YP_009250032	YP_009250032.1		P26B [Urbanus proteus nucleopolyhedrovirus]	Urbanus proteus nucleopolyhedrovirus	MQLHLNRLCNMNVSNEIEEKMEINSFVLKVNHSLKTVSYVSFKNKPIDVHVFTGFEGGDMYNSYHKYCTYATTLLPKRLNRYKPVKVMTFDDNKMMEITEMSADNKMYFVHNHYYNNYTYALTPGLKIHRNNIRKMYTGAPVFDENGRWVSCISEVYIEDNSEFCIFPLENDSTSSLRGLFQFNGYVYFTHNEDKINFDKIVPQNQIDVYVNSYKSNTYINLTFNGKIVNSLHVKAPFAGNVLII	245	Viruses; Baculoviridae
YP_002268130	YP_002268130.1	AgipMNPV	P26 [Agrotis ipsilon multiple nucleopolyhedrovirus]	Agrotis ipsilon multiple nucleopolyhedrovirus	MSSHINSVGDKLVVANTLVDTIKSITYSVNHVIRRVSVLSEKNSTVRVHVFGQHDTAADLEDIKHHYPGVASDVKFGKLHRHSFVNVMLFDSNRRPYLRRMRLQDRLYYTHHHYAKYYVYGQVPAVIQKTDISEFMQQLYVSAPIFDDSGKLVSVVTDYYVNDENQCVLPISGEAGGTQGTLCIDGFVYVTEPEDSLSYRTIQIVARIDVYVAFDKKNVFINLLYNGVIISKLRIRTLFAANVLIL	246	Viruses; Baculoviridae; Alphabaculovirus
YP_009112651	YP_009112651.1	AgseNPV-B	p26 [Agrotis segetum nucleopolyhedrovirus B]	Agrotis segetum nucleopolyhedrovirus B	MSSHMKSVGDKLVVANTLVDTVKSITYSVNHIIRRVSVLSEKNLAVRVHVFGQHDTAADLEDIKYHYPGVASDVKFGKLHRHSFVNVLLFDGNRRPYLRRMRVQDRLYYTHHHYAKYYVYGQVPAVIQKTDISEFMQHLYVSAPIFDDSGKLVSVVTDYYVNDQNQCVLPISGEAGGTQGTLCIDGFVYVTEPEDSLSYRTIQIVSRIDVYVAYDKKNVFINLLYNGVTISKLRIRTLFAANVLIL	246	Viruses; Baculoviridae; Alphabaculovirus
CAB3222270	CAB3222270.1		unnamed protein product [Arctia plantaginis]	Arctia plantaginis	MNSQCKMSKRTALNENYKGLVEELSIPAEVHERDGKKYASFGSTIPIHSCSPDEIKQYANKTHHYCDVFTEQILAPLGELVYVRLDENTAEKVFINRNKRILLVSSDGELAQWRCAPTFESPNSYMAGAPIVNKDGELVSVVTAKKGNHYAVSTFEGEGGYFDTAVPWLVLDAPEGANIYGAKTFATREQLREHVARLPPPEVSPQSPPVPVLHRGNSPRIILLAQNGRQISHQFLHGVITMDVEYL	247	Eukaryota; Metazoa; Ecdysozoa; Arthropoda; Hexapoda; Insecta; Pterygota; Neoptera; Holometabola; Lepidoptera; Glossata; Ditrysia; Noctuoidea; Erebidae; Arctiinae; Arctia
YP_007250540	YP_007250540.1		p26 protein [Thysanoplusia orichalcea nucleopolyhedrovirus]	Thysanoplusia orichalcea nucleopolyhedrovirus	MAKQVDVMEEVYNVKCTTDSKKMEIKQIDDVDAFVQVIEPGQEVFNETFNEYHQFPGVVSSIVFPQLALDTIVNILTEDGSLHTAKLNHTCFNFHVCNKRFVFGNLPAAIVNGETKRKLRIGAPIFANETLVSVVTAFHRIDENEWMLPVTGIREATQFSGHMKVLNGVCVEKWRPNMSVYGTVQLPYDKIKQHAVEQKLPPMSAPESCVLFYKESEIRITFNRGDYEIIHFRLPGPLVQPSITYYN	247	Viruses; Baculoviridae; Alphabaculovirus
AXU41686	AXU41686.1		P26 [Spodoptera eridania nucleopolyhedrovirus]	Spodoptera eridania nucleopolyhedrovirus	MSLCVNSVATTDDVAHPFAYVEHIKSVTYSVNHIARRVRVLSDKDCSVRIHVFGQHDTAADFEHIKYHYPGVASDVKFAKLKKNSYINIMLFDSNHKAYLRRMRVQDRMYYTHHHYAKYYVYGQVPAVVQKTNVAEFLSQLYVSAPIFDDNGTLISVISDYYVNDDNQCIVPVSGDAGGTQGTLCLDGFVYVTDPQDKLTYHTLQILPRIDVYVTFDKKNVYVNVMYNGETISKIRIKTQFAGNVLIL	248	Viruses; Baculoviridae; Alphabaculovirus; unclassified Alphabaculovirus
XP_028161013	XP_028161013.1	Asian corn borer	uncharacterized protein LOC114353284 isoform X5 [Ostrinia furnacalis]	Ostrinia furnacalis	MFIVRSSMSKRTVLNEQYKGLVEAMAIPAELHERDGKRLASFGAVLPIHCAAPEQVEQLANTTHHYCDVFTDELLAPLGELAYVRIDENTAEKVFINRSKRILLISSDGQMAQWRCAATFESANQFLAGTPIVNKDGALVSVVTAKRGNNYAVSTFEGEGGYFETSEPWEVIDAPASGLIYGTQAFANREALRQHLLSLPAALVDASSPARPALLRGAHARIVLVARNGRQIAHHYLQGVLTNDIDYL	248	Eukaryota; Metazoa; Ecdysozoa; Arthropoda; Hexapoda; Insecta; Pterygota; Neoptera; Holometabola; Lepidoptera; Glossata; Ditrysia; Pyraloidea; Crambidae; Pyraustinae; Ostrinia
PCG80277	PCG80277.1	tobacco budworm	hypothetical protein B5V51_9615 [Heliothis virescens]	Heliothis virescens	MSKRTGFPTPSGSAGLTYRGLVESMAIPAELHQRPDGRHFASFGGALPIHCCTPEQVEKLSKTTHHYCDIFTEQLLAPLGELVYVRIDENTAEKVFINRSKRVLVVSSDGVLAQWRLAPTFESANLYVAGTPVVNQAGELVSLVTAKRGNHYAVSTFEGEGGYFDTTEPWQTRDIPEGCGVYGDRTFSSRDELRAYVSALPPLGDPPAGAPTPLLYQGATPRLVLVAKNGRQISHQYLHGVVTDNIEYL	249	Eukaryota; Metazoa; Ecdysozoa; Arthropoda; Hexapoda; Insecta; Pterygota; Neoptera; Holometabola; Lepidoptera; Glossata; Ditrysia; Noctuoidea; Noctuidae; Heliothinae; Heliothis
XP_021193735	XP_021193735.1	cotton bollworm	uncharacterized protein LOC110378694 isoform X2 [Helicoverpa armigera]	Helicoverpa armigera	MSQRTGFPTSNGPAGLTYRGLVERMAIPAELHRRADGRQYASFGDARPIHCCTPEQVEKLSQTTHHYCDIFTEQLLAPLGELGYVRIDENTAEKVFINRSKRLLVVSSDGVLAQWRLAPTFESANLYVAGTPVVNQAGELVSLVTAKRGNHYAVSTFEGEGGYFDTSEAWQVRDIPEGRGVYGDRTFPSRDELRAYVSSLPPIDAPPTGPPTPILWRGATPRLVLLAKNGRQISHQYLHGVSADNIEYL	249	Eukaryota; Metazoa; Ecdysozoa; Arthropoda; Hexapoda; Insecta; Pterygota; Neoptera; Holometabola; Lepidoptera; Glossata; Ditrysia; Noctuoidea; Noctuidae; Heliothinae; Helicoverpa
CAB3245528	CAB3245528.1		unnamed protein product [Arctia plantaginis]	Arctia plantaginis	MYNANSQCKMSKRTALNENYKGLVEELPIPAEVHERDGKKYASFGSTIPIHSCSPDEIKQYANKTHHYCDVFTEQLLAPLGELVYVRLDENTAEKVFINRNKRILLVSSDGELAQWRCAPTFESPNSYMAGAPIVNKDGELVSVVTAKKGNHYAVSTFEGEGGYFDTAVPWLVLDAPEGANIYGAKTFATREQLREHVARLPPPEVSPQSPPVPVLHRGNSPRIILLAQNGRQISHQFLHGVITMDVEYL	250	Eukaryota; Metazoa; Ecdysozoa; Arthropoda; Hexapoda; Insecta; Pterygota; Neoptera; Holometabola; Lepidoptera; Glossata; Ditrysia; Noctuoidea; Erebidae; Arctiinae; Arctia
CDG72838	CDG72838.1		p26 (Ac136) [Spodoptera exigua multiple nucleopolyhedrovirus]	Spodoptera exigua multiple nucleopolyhedrovirus	MSMCVNSVATNDVAKPSTFAARVEHMKSVIYSVNHVARRVYLISEKDRSVRVHVFGQHDTAPEFEHIKYQYPGVASDVKFAKLKKNSYVNIMLFDSNKKAYLRRMRVQDRMYYTHHHYGKYYVYGQVPAVVQKSNIAEFMAQLYVSAPIFDDNGALISVISDYYVNDDNHCIVPVSGDAGGTHGSLCLDGFVYVTDPQDKLTYHTIQIVPRIDAYVTFDKKNVYVDVIYNGETISKIRIKTQFAGNVLIL	250	Viruses; Baculoviridae; Alphabaculovirus
NP_037847	NP_037847.1		ORF87 p26 [Spodoptera exigua multiple nucleopolyhedrovirus]	Spodoptera exigua multiple nucleopolyhedrovirus	MSMCINSVATNDVAKPSTFAARVEHMKSVIYSVNHVARRVYLISEKDRSVRVHVFGQHDTAPEFEHIKYQYPGVASDVKFAKLKKNSYVNIMLFDSNKKAYLRRMRVQDRMYYTHHHYGKYYVYGQVPAVVQKSNIAEFMAQLYVSAPIFDDNGALISVISDYYVNDDNHCIVPVSGDAGGTHGSLCLDGFVYVTDPQDKLTYHTIQIVPRIDAYVTFDKKNVYVDVIYNGETISKIRIKTQFAGNVLIL	250	Viruses; Baculoviridae; Alphabaculovirus
XP_031764484	XP_031764484.1	greater wax moth	poxin-like [Galleria mellonella]	Galleria mellonella	MSKRTVLNENYKGIVENFPIPAELHERPDGTTYASFGDVVPIHCCTPEQVSKLAKVTHHYCDVFTQELMAPLEELAYVRLDENTAEKVFINRTKRLLITSSDGQLAQWRCAPSFESANQYVAGAPVVNQDGALLSVVTARKGNHYAVSTFEVCFYFHTIFAYFPQLRILRIYFLACWCYSKYYGAETFNSREELTEYISKTPPASVGPSEPPTAILVQGKTPRLALVAKNGRQIAHHYLPPGLVTEVDYL	250	Eukaryota; Metazoa; Ecdysozoa; Arthropoda; Hexapoda; Insecta; Pterygota; Neoptera; Holometabola; Lepidoptera; Glossata; Ditrysia; Pyraloidea; Pyralidae; Galleriinae; Galleria
YP_003517776	YP_003517776.1		P26 [Lymantria xylina nucleopolyhedrovirus]	Lymantria xylina nucleopolyhedrovirus	MSKVSVVLITVAVACAAATETGSGRAHSVDYVVRRLSRTVDVTSVRDRKTVIKIVSPNQWDDEDGDEFAYRYPGAASDAAFETVRVGEKLHVLLDNHTLVEAVATTDEYVFYHTRRRRSVVGRLAAFAVRDFALAARIWPGAPIFRRGRFVSVVTGRYQDYANDRVLFPVTGASAEAAEVAHDRDRLSVNSSPYAPTPPLARAGAFRDWPRVATLFCDAPRRRVVLALTEGEFEIARFTLVGVLADFEHI	250	Viruses; Baculoviridae; Alphabaculovirus
AFS51896	AFS51896.1		DekiORF18 [Dendrolimus kikuchii nucleopolyhedrovirus]	Dendrolimus kikuchii nucleopolyhedrovirus	MAATRGGVEYRTQHVTRTVEIKRVNGVDAFVHVFEPGHEVFEDTLNKYHQFPGVATSIAFKQPSLNSEVSVMLNDGTLHTAPVDTVCFNFHVCNKRFVFGTVPAMRIDKRIRERVYEGSPIFQKEKLISAVTGFHYVDDNEYLMPVTGIREPTLVSGHLTAANGVRVEKWLPNMSIYGSRQLPYDKIKTYILEINQKQQQQQQQHISSYEDVCVIFYNDTEVRITHSINGCEQLHFRLSGVLMQPNVLYYN	251	Viruses; Baculoviridae; Alphabaculovirus; unclassified Alphabaculovirus
CDG72427	CDG72427.1		p26 (Ac136) [Spodoptera exigua multiple nucleopolyhedrovirus]	Spodoptera exigua multiple nucleopolyhedrovirus	MSMCVNSVATNDVAKPSTFAAARVEHMKSVIYSVNHVARRVYLISEKDRSVRVHVFGQHDTAPEFEHIKYQYPGVASDVKFAKLKKNSYVNIMLFDSNKKAYLRRMRVQDRMYYTHHHYGKYYVYGQVPAVVQKSNIAEFMAQLYVSAPIFDDNGALISVISDYYVNDDNHCIVPVSGDAGGTHGSLCLDGFVYVTDPQDKLTYHTIQIVPRIDAYVTFDKKNVYVDVIYNGETISKIRIKTQFAGNVLIL	251	Viruses; Baculoviridae; Alphabaculovirus
QCQ67291	QCQ67291.1		P26 [Lymantria dispar multiple nucleopolyhedrovirus]	Lymantria dispar multiple nucleopolyhedrovirus	MSKVSAILILMIVAGVAAAETGSGRVYSVDYVVRPSRRTVDVTSVDGRKITVKVVPPHRWDDEDDAAELAYRYPGAASDAPFETARVGQKLQVLLDNHTLIDAVAATDEYVFHHTRRRRSVVGKLAAFALNDFALAARVWPGAPIFRRGRFVSVVSGRYQDYANDRVLFPVTGASAQMVEVAHDRDRLSVSSSARPPARAAGDGREFRDWPRVATLFCDAPRRRVALALTEGEFEIARFALVGLLADFEHI	251	Viruses; Baculoviridae; Alphabaculovirus
XP_022831422	XP_022831422.1		uncharacterized protein LOC111359938 isoform X3 [Spodoptera litura]	Spodoptera litura	MSKRTGFPNTTAPAAAGLTYRGIVENMSIPAELHQRPDGRPYATFGSVVPIHCCTPEQVEQHRKTTHHYCDIFTDETLAPLGDLVYVRIDENTAEKVFINRRQRVLLVSSDGVLAQWRLAPTFESANLYLAGTPIVDQAGHLVSVVTAKWGRHYAVSAIEGEGGYFDTSLPWETLTIPEGSSVYGNRTFQSRDELREYVASLPPAGSPAAGEVSPLLYRGDSPRLVLVSPSGRQLSHHYLHGVIANDVEYL	251	Eukaryota; Metazoa; Ecdysozoa; Arthropoda; Hexapoda; Insecta; Pterygota; Neoptera; Holometabola; Lepidoptera; Glossata; Ditrysia; Noctuoidea; Noctuidae; Amphipyrinae; Spodoptera
XP_028161007	XP_028161007.1	Asian corn borer	uncharacterized protein LOC114353284 isoform X3 [Ostrinia furnacalis]	Ostrinia furnacalis	MELSKVRRSSMSKRTVLNEQYKGLVEAMAIPAELHERDGKRLASFGAVLPIHCAAPEQVEQLANTTHHYCDVFTDELLAPLGELAYVRIDENTAEKVFINRSKRILLISSDGQMAQWRCAATFESANQFLAGTPIVNKDGALVSVVTAKRGNNYAVSTFEGEGGYFETSEPWEVIDAPASGLIYGTQAFANREALRQHLLSLPAALVDASSPARPALLRGAHARIVLVARNGRQIAHHYLQGVLTNDIDYL	251	Eukaryota; Metazoa; Ecdysozoa; Arthropoda; Hexapoda; Insecta; Pterygota; Neoptera; Holometabola; Lepidoptera; Glossata; Ditrysia; Pyraloidea; Crambidae; Pyraustinae; Ostrinia
XP_028161010	XP_028161010.1	Asian corn borer	uncharacterized protein LOC114353284 isoform X4 [Ostrinia furnacalis]	Ostrinia furnacalis	MELSKVRRSSMSKRTVLNEQYKGLVEAMAIPAELHERDGKRFASFGAVLPIHCAAPEQVEQLANTTHHYCDVFTDELLAPLGELAYVRIDENTAEKVFINRSKRILLISSDGQMAQWRCAATFESANQFLAGTPIVNKDGALVSVVTAKRGNNYAVSTFEGEGGYFETSEPWEVIDAPASGLIYGTQAFANREALRQHLLSLPAALVDASSPARPALLRGAHARIVLVARNGRQIAHHYLQGVLTNDIDYL	251	Eukaryota; Metazoa; Ecdysozoa; Arthropoda; Hexapoda; Insecta; Pterygota; Neoptera; Holometabola; Lepidoptera; Glossata; Ditrysia; Pyraloidea; Crambidae; Pyraustinae; Ostrinia
YP_002332788	YP_002332788.1		P26 [Spodoptera litura nucleopolyhedrovirus II]	Spodoptera litura nucleopolyhedrovirus II	MSLRVNSVATTDDVANAPLPFAYVEHIKSVTYSVNHIARRVRVLSDKDCSVRIHVFGQHDTAADFEHIKYHYPGVASDVKFAKLKKNSYINIMLFDSNHKAYLRRMRVQDRMYYTHHHYAKYYVYGQVPAVVQKTNVAEFLSQLYVSAPIFDDNGTLISVISDYYVNDDNQCIVPVSGDAGGTQGTLCLDGFVYVTDPQDKLTYHTLQILPRIDVYVTFDKKNVYVNVMYNGETISKIRIKTQFAGNVLIL	251	Viruses; Baculoviridae; Alphabaculovirus; unclassified Alphabaculovirus
ACA02643	ACA02643.1		P26 [Spodoptera frugiperda multiple nucleopolyhedrovirus]	Spodoptera frugiperda multiple nucleopolyhedrovirus	MSLRINSVATENVAAAAGTANVSTIEYIKSITYCVNHMTRRVYVLSEKNCAVRIHVFGQHDTSADFENIKYHYPGVASDVKFLKLKRNSYVNILLFNANNKPYLRRMRIQDRMYYTHHHYAKYYVYGQVPAIMQKNNLAEFMSQLYVSAPIFDDNGTLISVVTDYYVNDENHCIVPIAGDAGGAQGTVCLDGFVYVTDPNDHLTFHTFQILPRIDVYVTFDKKNVYINVVYNGEPISKLRVKTQFAGNVLIL	252	Viruses; Baculoviridae; Alphabaculovirus
AHC69537	AHC69537.1		P26 [Lymantria dispar multiple nucleopolyhedrovirus]	Lymantria dispar multiple nucleopolyhedrovirus	MSKVSAILILMIVADVAAAAETGSGRVYSVDYVVRPSRRTVDVTSVDGRKITVKVVPPHRWDDEDDAAELAYRYPGAASDAPFETARVGQKLQVLLDNHTLIDAVAATDEYVFHHTRRRRSVVGKLAAFALNDFALAARVWPGAPIFRRGRFVSVVSGRYQDYANDRVLFPVTGASAQMVEVAHDRDRLSVSSSARPPARAAGDGREFRDWPRVATLFCDAPRRRVALALTEGEFEIARFALVGLLADFEHI	252	Viruses; Baculoviridae; Alphabaculovirus
AIW01497	AIW01497.1		P26 protein [Spodoptera frugiperda multiple nucleopolyhedrovirus]	Spodoptera frugiperda multiple nucleopolyhedrovirus	MSLRINSVATENVAAAAGAVNVSTIEYIKSITYCVNHMTRRVYVLSEKNCAVRIHVFGQHDTSADFEDIKYHYPGVASDVKFLKLKRNSYVNILLFNANNKPYLRRMRIQDRMYYTHHHYAKYYVYGQVPAIMQKNNLAEFMSQLYVSAPIFDDNGTLISVVTDYYVNDENHCIVPIAGDAGGAQGTVCLDGFVYVTDPNDHLTFHTFQILPRIDVYVTFDKKNVYINVVYNGEPISKLRVKTQFAGNVLIL	252	Viruses; Baculoviridae; Alphabaculovirus
AIX47878	AIX47878.1	LdMNPV-3029	P26 [Lymantria dispar multiple nucleopolyhedrovirus]	Lymantria dispar multiple nucleopolyhedrovirus	MSKVSAILILMIVAGVAAAETGSGRVYSVDYVVRPSRRTVDVTSVDGRKITVKVVPPHRWDDEDDAAAELAYRYPGAASDAPFEAARVGQKLQVLLDNHTLIDAVAATDEYVFHHTRRRRSVVGKLAAFALNDFALAARVWPGAPIFRRGRFVSVVSGRYQDYANDRVLFPVTGASAQMVEVAHDRDRLSVSSSARPPARAAGDGREFRDWPRVATLFCDAPRRRVALALTEGEFEIARFALVGLLADFEHI	252	Viruses; Baculoviridae; Alphabaculovirus
AJR20312	AJR20312.1		p26 [Lymantria dispar multiple nucleopolyhedrovirus]	Lymantria dispar multiple nucleopolyhedrovirus	MSKVSAILILMIVAGVAAAAETGSGRVYSVDYVVRPSRRTVDVTSVDGRKITVKVVPPHRWDDEDDAAELAYRYPGAASDAPFEAARVGQKLQVLLDNHTLIDAVAATDEYVFHHTRRRRSVVGKLAAFALNDFALAARVWPGAPIFRRGRFVSVVSGRYQDYANDRVLFPVTGASAQMVEVAHDRDRLSVSSSARPPARAAGDGREFRDWPRVATLFCDAPRRRVALALTEGEFEIARFALVGLLADFEHI	252	Viruses; Baculoviridae; Alphabaculovirus
AMO27711	AMO27711.1		P26 [Lymantria dispar multiple nucleopolyhedrovirus]	Lymantria dispar multiple nucleopolyhedrovirus	MSKVSAILILMIVAGVAAAAETGSGRVYSVDYVVRPSRRTVDVTSVDGRKITVKVVPPHRWDDEDDAAELAYRYPGAASDAPFETARVGQTLQVLLDNHTLIDAVAATDEYVFHHTRRRRSVVGKLAAFALNDFALAARVWPGAPIFRRGRFVSVVSGRYQDYANDRVLFPVTGASAQMVEVTHDRDRLSVSSSARPPARAAGDGREFRDWPRVATLFCDAPRRRVALALTEGEFEIARFALVGLLADFEHI	252	Viruses; Baculoviridae; Alphabaculovirus
QDE14895	QDE14895.1		p26 [Lymantria dispar multiple nucleopolyhedrovirus]	Lymantria dispar multiple nucleopolyhedrovirus	MSKVSAILILMIVAGVAAAAETGSGRVYSVDYVVRPSRRTVDVTSVDGRKITVKVVPPHRWDDEDDAAELAYRYPGAASDAPFETARVGQTLQVLLDNHTLIDAVAATDEYVFHHTRRRRSVVGKLAAFALNDFALAARVWPGAPIFRRGRFVSVVSGRYQDYANDRVLFPVTGASAQMVEVAHDRDRLSVSSSARPPARAAGDGREFRDWPRVATLFCDAPRRRVALALTEGEFEIARFALVGLLADFEHI	252	Viruses; Baculoviridae; Alphabaculovirus
QDH05884	QDH05884.1		Ld-p26 [Lymantria dispar multiple nucleopolyhedrovirus]	Lymantria dispar multiple nucleopolyhedrovirus	MSKVSAILILMIVAGVAAAAETGSGRVYSVDYVVRPSRRTVDVTSVDGRKITVKVVPPHRWDDEDDAAELAYRYPGAASDAPFETARVGQKLQVLLDNHTLIDAVAATDEYVFHHTRRRRSVVGKLAAFALNDFALAARVWPGAPIFRRGRFVSVVSGRYQDYANDRVLFPVTGASAQMVEVAHDRDRLSVSSSARPPARAAGDGREFRDWPRVATLFCDAPRRRVALALTEGEFEIARFALVGLLADFEHI	252	Viruses; Baculoviridae; Alphabaculovirus
XP_022120735	XP_022120735.1	cabbage white	uncharacterized protein LOC110997070 isoform X2 [Pieris rapae]	Pieris rapae	MSRRESGEDKSDDMSQRTVLNEQYKGLVERMSVPVELHEREGRRYATCASLVPIHCCTTEQKAELSVSTHHYCDVFTEQVLAHLAELAYVRLDADTAEKVFLNRTKRILLVSSDGKLAQWRCAPTFESANNYIAGAPIVNKDGSIVSIVTAKRGNHYAVSNAEGEGGYFETSKPWEIIDTGDAKFVYADKTFSTREELRAYINSLPPASLASPPRPLLIRGNSPRVALVAENGRQLVHIYLSGVLVNDVQYL	252	Eukaryota; Metazoa; Ecdysozoa; Arthropoda; Hexapoda; Insecta; Pterygota; Neoptera; Holometabola; Lepidoptera; Glossata; Ditrysia; Papilionoidea; Pieridae; Pierinae; Pieris
YP_001036378	YP_001036378.1		p26 [Spodoptera frugiperda multiple nucleopolyhedrovirus]	Spodoptera frugiperda multiple nucleopolyhedrovirus	MSLRINSVATENVAAAAGAANVSTIEYIKSITYCVNHMTRRVYVLSEKNCAVRIHVFGQHDTSADFENIKYHYPGVASDVKFLKLKRNSYVNILLFNANNKPYLRRMRIQDRMYYTHHHYAKYYVYGQVPAIMQKNNLAEFMSQLYVSAPIFDDNGTLISVVTDYYVNDENHCIVPIAGDAGGAQGTVCLDGFVYVTDPNDHLTFHTFQILPRIDVYVTFDKKNVYINVVYNGEPISKLRVKTQFAGNVLIL	252	Viruses; Baculoviridae; Alphabaculovirus
NP_047676	NP_047676.1		Ld-p26 peptide [Lymantria dispar multiple nucleopolyhedrovirus]	Lymantria dispar multiple nucleopolyhedrovirus	MSKVSAILILMIVAGVAAAETGSGRVYSVDYVVRPSRRTVDVTSVDGRKITVKVVPPHRWDDEDDDAAAELAYRYPGAASDAPFEAARVGQKLQVLLDNHTLIDAVAATDEYVFHHTRRRRSVVGKLAAFALNDFALAARVWPGAPIFRRGRFVSVVSGRYQDYANDRVLFPVTGASAQMVEVAHDRDRLSVSSSARPPARAAGDGREFRDWPRVATLFCDAPRRRVALALTEGEFEIARFALVGLLADFEHI	253	Viruses; Baculoviridae; Alphabaculovirus
QEI03538	QEI03538.1		P26-B [Spodoptera cosmioides nucleopolyhedrovirus]	Spodoptera cosmioides nucleopolyhedrovirus	MSLRINSVATDDVASNKLPPHPFTCVENMKSVTYSVNHIARRVRVLSDKDCSVRIHVFGQHDTAADFERIKYHYPGVASDVKFAKLKKNSYINIMLFDSNKKAYLRRMRVQDRMYYTHHHYAKYYVYGQVPAVVQKTNVGEFLSQLYVSAPIFDDNGALISVISDYYVTDDNHCIVPVSGDAGGTQGTLCLDGFVYVTDPHDKLTYHTLQIVPRIDVYVTFDKKNVYIDVMYNGESISKIRIKTQFAGNVLIL	253	Viruses; Baculoviridae; Alphabaculovirus; unclassified Alphabaculovirus
YP_009666756	YP_009666756.1		P26 [Mythimna unipuncta nucleopolyhedrovirus]	Mythimna unipuncta nucleopolyhedrovirus	MSTSIKVAASDGTDVANANDNLVLGRIGGIKNVTYTADHNMRRVRILTNRNESVHIHVFGQHDYASELEGIKYHYPGVASDVKFNRLPRNSFVSVMLFDSNKRAYLRRMRLRDRLYYTHHHYAKYYVYGQVPAVMQKTNISEFMTQLYVSAPIFNDAGDLVSVVSDYYVDDQNQCVLPISGESSGCHGTLCLDGFVYVTDSEDTLTHHTIQIVARIDVYVSFDKKNVYVNVLYNGNTISKLCIRTQFAANVLIL	254	Viruses; Baculoviridae; Alphabaculovirus
XP_013143919	XP_013143919.1	common Mormon	PREDICTED: uncharacterized protein LOC106107572 isoform X2 [Papilio polytes]	Papilio polytes	MDYRPLLFIKKCTTMSKRTVLNEVYKGLVESMSIPAEVHHRNGKKYASFGTVVPIHCCTPEQVKERVNDTHHYCDVFTEELLAPLGELAFVRLDENTAEKVFINRSKRVLMVSSDGRLAQWRCAPTFESANHYIAGTPIVNKEGALVSVVTAKRGNHYAVSNFEGEGGYFETSLPWEIVHPMQGEVIYGEQTFSSRDELRKHLANLSPAEVTSDLPVRPVLLTGVTPRLTLITHNGRQLAHYYLYGVHASDVQYL	255	Eukaryota; Metazoa; Ecdysozoa; Arthropoda; Hexapoda; Insecta; Pterygota; Neoptera; Holometabola; Lepidoptera; Glossata; Ditrysia; Papilionoidea; Papilionidae; Papilioninae; Papilio
XP_021205460	XP_021205460.1	domestic silkworm	uncharacterized protein LOC101743840 [Bombyx mori]	Bombyx mori	MTGIVELDLRMLKKKTAMSKRTVLNENYKGIVESMSIPAEIHERNGKKYASVGSILPIHCCPPEELERRAESTHHYCGVFTDELLAPLEELAYVRLDENTAEKVFINRAKRILIVSSDGHLAQWRCAPTFESANRYIAGTPIVDQRGGVISVVVAKKNNHYAVSSFEGEGGYFESTQNWKVVEPAAGGYAYGELTFPSRTALREHVAGLRGGAGAWGDAVPVLRGGTSPRLALVLDGRQLAHYYLHNVIVDVEYL	255	Eukaryota; Metazoa; Ecdysozoa; Arthropoda; Hexapoda; Insecta; Pterygota; Neoptera; Holometabola; Lepidoptera; Glossata; Ditrysia; Bombycoidea; Bombycidae; Bombycinae; Bombyx
XP_028034545	XP_028034545.1	wild silkworm	uncharacterized protein LOC114246282 isoform X1 [Bombyx mandarina]	Bombyx mandarina	MTGIVELDLRMLKKKTAMSKRTVLNENYKGIVESMSIPAEIHERNGKKYASVGSILPIHCCPPEELERRAESTHHYCGVFTDELLAPLEELAYVRLDENTAEKVFINRAKRILIVSSDGHLAQWRCAPTFESANRYIAGTPIVDQRGGVISVVVAKKNNHYAVSSFEGEGGYFESTQNWKVVEPAAGGYAYGELTFPSRTALREHVAGLRGGAGAWGDAVPVLRGGTSPRLALVLDGRQLAHYYLHNVIADVEYL	255	Eukaryota; Metazoa; Ecdysozoa; Arthropoda; Hexapoda; Insecta; Pterygota; Neoptera; Holometabola; Lepidoptera; Glossata; Ditrysia; Bombycoidea; Bombycidae; Bombycinae; Bombyx
YP_758317	YP_758317.1		p26 [Leucania separata nucleopolyhedrovirus]	Leucania separata nucleopolyhedrovirus	MDNLLLCHSDRSMRILKTADLNIRIFSPLSSNLIDANDDDDDKTDDDELDRLHHFPGVASTIVFPFVEIDQILYVMLSDLTLQRVHIVNDDHEPLFNFHVYKNRVVYGQLRSFEAPDRNVANKIYVGAPIFSDASKRNVVSVVTARCALPDLRFPVSGVRSEGLVSGQIEIDGEYVIQRQRTADTSVYGRKVATYADIKKFAIDCNVNKSAHRNEPRAFIVTEGDGNNTITIALVENQFEIFRVRMSGSLVAQNGG	256	Viruses; Baculoviridae; Alphabaculovirus
AOT85490	AOT85490.1		p26 [Cyclophragma undans nucleopolyhedrovirus]	Cyclophragma undans nucleopolyhedrovirus	MAKTSCHGVDYETRHAAQRIEIKRVDGVDVFIRVFNPGQEVFDEALDDYHQFPGVATSIVFKQPSLRSEASVMLNDGTLHSAFINEVCFNFHVCNKRFVFGTVSAMQINRRVRDKLYTGSPIFQDNKLISAVTGFHYINEDHYLMAVTGVRESTLVSGHLTAANGVRVEKRLPNMSIYGARQLPYDRIKAFILETQQKRQQQQQQQQQTTVLSLSTDVCVIFYDDTEVRITYSNNGCETLHLRLPGVLMQSKVFYYNL	258	Viruses; Baculoviridae; Alphabaculovirus; unclassified Alphabaculovirus
YP_009666370	YP_009666370.1		P26 [Lonomia obliqua multiple nucleopolyhedrovirus]	Lonomia obliqua multiple nucleopolyhedrovirus	MAASDNDNNLIKNNVTYEIDHVNKRIKVKQVDQENVFMRVLKPAQEIFDEDLDCYHQFPGVITSLVFPRLNLNDIVDVLLSDNTLYSCRADRVCFNFHICNKRVVFGSLIALHITNADLLEKLYIGSPVFVNNKFVSIITAFHRYVNDNDKEEYLVPITGVRESSQVSGHLKTPYGVHVEKLRPNMSVYGNKQLPYDKIKRYALEQHNAIPLNKEIQEHVVIFYNDKEVRLTYNRINYELLHLRMNGPLIEPNSMYYK	258	Viruses; Baculoviridae; Alphabaculovirus; Lonomia obliqua nucleopolyhedrovirus
YP_002854671	YP_002854671.1		P26-2 [Euproctis pseudoconspersa nucleopolyhedrovirus]	Euproctis pseudoconspersa nucleopolyhedrovirus	MNVFIVNDTLMEVDFNFRRVRCLKYKNKPIFVKIHSSSEAVNHAEDKKMVTANVPQEERSSEINVDDDAAHHHYPGMTCSLKLPKVNAGTTVKVVCFNDKNKTVRVESVRLDSCLYYAHHRRGNVYVLGLVPAIVMTYDKTANSAAESIFLGSPVFNADNRLISFITDHYLDSKTKNDETIIKEILPVSGESYRLQSAFSLTGKVRIYYENDLANRKLSPSLSIDIDVIVRRNQVEVFVIYNKKTISYLKIKCKYAGNVLVV	262	Viruses; Baculoviridae; Alphabaculovirus
AAC59606	AAC59606.1		P26 [Buzura suppressaria nucleopolyhedrovirus]	Buzura suppressaria nucleopolyhedrovirus	MIELFFLAIAFLSTAKTSSINNVHYIVDEFNKSIKITHVNGVEVTVQIIPPHGEFSTREFDTMHQFPGVATDLLLTGAPSDKAILHVLMKDGNLLRTTANRVFSNFHVYRHRMVYGQLYTFVTDDFGEAEKIYLGAPIFYNNKLVSVVTCRFDDYERGLVYFPVTGVRHDRLISGQLHFDDNIVKVTRLQPGMSVYGRNQLPYSLGVKQLAMSAYNNRQMYRDWPRTVFVYYNESDIIISLVEGEFEISRVRFQGPLVEPQHK	263	Viruses; Baculoviridae; Alphabaculovirus
AKN90978	AKN90978.1		P26 [Buzura suppressaria nucleopolyhedrovirus]	Buzura suppressaria nucleopolyhedrovirus	MIELFFLAIAFLNTAKTSSINNVHYIVDEFNKSIKITHVNGVEVTVQIIPPHGEFSTREFDTMHQFPGVATDLLLTGAPSDKAILHVLMKDGNLLRTTANRVFSNFHVYRHRMVYGQLYTFVTDDFGEAEKIYLGAPIFYNNKLVSVVTCRFDDYERGLVYFPVTGVRHDRLISGQLHFDDNIVKVTRLQPGMSVYGRNQLPYSLGVKQLAMSAYNNRQMYRDWPRTVFVYYNESDIIISLVEGEFEISRVRFQGPLVEPQHK	263	Viruses; Baculoviridae; Alphabaculovirus
AWW14370	AWW14370.1		p26 [Hyposidra talaca NPV]	Hyposidra talaca NPV	MIKLLFLAIALMNTAATLSVYNVQYVVDENDKTMNITHVNGVRTTVRVIPPHGEILAREYDAMHQFPGVATDVMLTGTPSNRAILHVLLSDGVMLRTVADRVFTNFHVHRQRMIYGQLFTFATDDFSVAEKIYPGAPIFYNNKLVSVVTCRFDDYERGLVYFPVTGVRNDRLVSGQMHIDDRVVKVTRLQPGMSVYGRSQMPYSLGVKQLAMSAYNNRQMYRDWPRTAFVYHNERDIIISLVEGEFEISRVRFQGPLVEPQHK	263	Viruses; Baculoviridae; Alphabaculovirus; unclassified Alphabaculovirus
CAB3245527	CAB3245527.1		unnamed protein product [Arctia plantaginis]	Arctia plantaginis	MSVQVLINRKKRVSVASDHNLAQCHCTSAFKSSNSYMAGASTVNKGSEFVSIVSAKKSNYHTISEGEVGYFDTAVPWLVLDAPEGQDVRHARAAARARFPTVDSVPNKLRQVNNRINFNVFEDTTKLTVNTASFNNGFNSVSNLEREYNEEIEEAQRSANFNPLKKEDHSFYEIETTLSKFIRRTVRDTLFELISKMDRSVIQSIDEENIMNGKSKKMKREDQIKDDGPIGGILTSDGETQMLMGTFQAIMRPGTLNLPNIQG	263	Eukaryota; Metazoa; Ecdysozoa; Arthropoda; Hexapoda; Insecta; Pterygota; Neoptera; Holometabola; Lepidoptera; Glossata; Ditrysia; Noctuoidea; Erebidae; Arctiinae; Arctia
YP_009001785	YP_009001785.1		P26 [Buzura suppressaria nucleopolyhedrovirus]	Buzura suppressaria nucleopolyhedrovirus	MIELFFLAIAFLSTAKTSSINNVHYIVDEFNKSIKITHVNGVEVTVQIIPPHGELSTREFDSMHQFPGVATDLLLTGAPSDKAILHVLMKDGNLLRTTANRVFSNFHVYRHRMVYGQLYTFVTDDFGEAEKIYLGAPIFYNNKLVSVVTCRFDDYERGLVYFPVTGVRHDRLISGQLHFDDNIVKVTRLQPGMSVYGRNQLPYSLGVKQLAMSAYNNRQMYRDWPRTVFVYYNESDIIISLVEGEFEISRVRFQGPLVEPQHK	263	Viruses; Baculoviridae; Alphabaculovirus
XP_011565910	XP_011565910.1	diamondback moth	PREDICTED: uncharacterized protein LOC105395651 isoform X1 [Plutella xylostella]	Plutella xylostella	MKMCSLTKLLLIINLVVFLKTKSTMAQRTVLNDNYKGLVESVSIPAVVEERDGKKFARSSSVVPIHCCTPDEISAYAPKTHHYCDVFTEEVLAPLEELAFVRLDQNTAEKVFINRKKRILLTSSDGALAQWRCAPTFESSNQYIAGAPIVNKEGALISVVTARVGNHYAVSSFEGDGGYFETPQPWKILDSSTGLIYGDRVFPTHEALKDFIATLGPAALGPDRPPTPVLVRGANPRVAFITKEGRQIAHNYLQGVISKGVEYL	264	Eukaryota; Metazoa; Ecdysozoa; Arthropoda; Hexapoda; Insecta; Pterygota; Neoptera; Holometabola; Lepidoptera; Glossata; Ditrysia; Yponomeutoidea; Plutellidae; Plutella
XP_028161005	XP_028161005.1	Asian corn borer	uncharacterized protein LOC114353284 isoform X1 [Ostrinia furnacalis]	Ostrinia furnacalis	MTSMIYLASCVLISVAFTNARSSMSKRTVLNEQYKGLVEAMAIPAELHERDGKRLASFGAVLPIHCAAPEQVEQLANTTHHYCDVFTDELLAPLGELAYVRIDENTAEKVFINRSKRILLISSDGQMAQWRCAATFESANQFLAGTPIVNKDGALVSVVTAKRGNNYAVSTFEGEGGYFETSEPWEVIDAPASGLIYGTQAFANREALRQHLLSLPAALVDASSPARPALLRGAHARIVLVARNGRQIAHHYLQGVLTNDIDYL	264	Eukaryota; Metazoa; Ecdysozoa; Arthropoda; Hexapoda; Insecta; Pterygota; Neoptera; Holometabola; Lepidoptera; Glossata; Ditrysia; Pyraloidea; Crambidae; Pyraustinae; Ostrinia
XP_028161006	XP_028161006.1	Asian corn borer	uncharacterized protein LOC114353284 isoform X2 [Ostrinia furnacalis]	Ostrinia furnacalis	MTSMIYLASCVLISVAFTNARSSMSKRTVLNEQYKGLVEAMAIPAELHERDGKRFASFGAVLPIHCAAPEQVEQLANTTHHYCDVFTDELLAPLGELAYVRIDENTAEKVFINRSKRILLISSDGQMAQWRCAATFESANQFLAGTPIVNKDGALVSVVTAKRGNNYAVSTFEGEGGYFETSEPWEVIDAPASGLIYGTQAFANREALRQHLLSLPAALVDASSPARPALLRGAHARIVLVARNGRQIAHHYLQGVLTNDIDYL	264	Eukaryota; Metazoa; Ecdysozoa; Arthropoda; Hexapoda; Insecta; Pterygota; Neoptera; Holometabola; Lepidoptera; Glossata; Ditrysia; Pyraloidea; Crambidae; Pyraustinae; Ostrinia
ALD88584	ALD88584.1		hypothetical protein HaSNPVNNg1_gp021 [Helicoverpa armigera nucleopolyhedrovirus]	Helicoverpa armigera nucleopolyhedrovirus	MLRQTCLFFAILASAIAAKSLQRYNVEYTIDNDLNRISIHKVDNRTVSINVIGHQSNDSDTLDRLHHFPGVATSVMFPRIDMSSALFVLLKNGAMARVIPEFVYTNYHVHKHRLVYSQLATFALEDRTVADMVLIGAPIFRNKKLVSVVTHRHDDRDAVMFPVTGVRPRNLVSGQIQFDSNNGVTPERLLTGRSVYGRRQMSYLPNERSVGIKEFALTSVANRDTFRNLTRNVHIFYNDDEIVITLSEGEFEISRIRFDGPLLYK	265	Viruses; Baculoviridae; Alphabaculovirus
XP_026730193	XP_026730193.1	cabbage looper	uncharacterized protein LOC113495595 isoform X1 [Trichoplusia ni]	Trichoplusia ni	MLTMFSLLAFLIHSSIFVVSDGRYIMGRTVLNESNKGLVENFSIPAELHERDGKRFASFGTTVPIHCCTPEQVAEFANKTHHYCDVFTEQVLAPLDELVYVRIDENTAEKVFINRSKRILLVSSDGVLAQWRSAPTFESSNRFLAGTPIVNKDGDLVSVVTARKGNHYAVSTFEGEGGYFETSQPWKVLDPPEGAAVYGDRWFPSREEVRAYTLSLPGAAVSAGSPPAPVLHRGGSGRLVLADARGRQLSHHYLHGVATTDVQYL	265	Eukaryota; Metazoa; Ecdysozoa; Arthropoda; Hexapoda; Insecta; Pterygota; Neoptera; Holometabola; Lepidoptera; Glossata; Ditrysia; Noctuoidea; Noctuidae; Plusiinae; Trichoplusia
AAD09281	AAD09281.1	fall webworm moth	immune-related Hdd13 [Hyphantria cunea]	Hyphantria cunea	MTTLFVFCILFVFRAEFSAEAYHVTMSKRTALNENYKGLVEELSIPAELHERDGKKYASFGSTIPIHSCSAEEIKRYANKTHHYCDVFTEQVLAPLGELVYVRLDENTAEKVFINRNKRILLVSSDGELAQWRCAPTFESPNSYIAGAPIVNKDGELVSVVTAKKGNHYAVSTFEGEGGYFDTAEPWRILDSPDGANIYGDKIFATRDQLRDYVSSVPASVVSAENPPVPVLHRGNSPRIILLAQNGRQISHQFLHGVITSDVEYL	266	Eukaryota; Metazoa; Ecdysozoa; Arthropoda; Hexapoda; Insecta; Pterygota; Neoptera; Holometabola; Lepidoptera; Glossata; Ditrysia; Noctuoidea; Erebidae; Arctiinae; Hyphantria
ACH88673	ACH88673.1		p26-a [Helicoverpa armigera multiple nucleopolyhedrovirus]	Helicoverpa armigera multiple nucleopolyhedrovirus	MAWQTLTLAVTLCALTAAMTTTTHNTLYSVDHVAKTMQVHEVDGNRVNITVIPPNSDTNDDESLSMYHHFPGVATQVLFPPVTSSDDLYVQLSDGVLYKTRATRVFTNFHSHKGRMVYGQLLTIAVDDFSIAGMIYVGAPIYRDKKLVSVVTCRYDDYDAQTVLFPVSGIRPRGLVSGQFNFDDRIIVQELRRGMSVYGREQLPYQSAHMSVKQFALTTNNNKQAYRDLPRAIAVFHNANEITIALVEGQFEIDRVRFDGPLITPQ	266	Viruses; Baculoviridae; Alphabaculovirus
AFP95871	AFP95871.1		p26 [Mamestra brassicae multiple nucleopolyhedrovirus]	Mamestra brassicae multiple nucleopolyhedrovirus	MAWQTLTLAVTLCALTTAMTTTTHNTLYSVDHVAKTMQVHEVDGNRVNITVIPPNSDTNDDESLSMYHHFPGVATQVLFPPVTSSDDLYVQLSDGVLYKTRATRVFTNFHSHKGRMVYGQLLTIAVDDFSIAGMIYVGAPIYRDKKLVSVVTCRYDDYDAQTVLFPVSGIRPRGLVSGQFNFDDRIIVQELRRGMSVYGREQLPYQSAHMSVKQFALTTNNNKQAYRDLPRAIAVFHNANEITIALVEGQFEIDRVRFDGPLITPQ	266	Viruses; Baculoviridae; Alphabaculovirus
KPI98967	KPI98967.1	Asian swallowtail	hypothetical protein RR46_10285 [Papilio xuthus]	Papilio xuthus	MPQIRCRHQVHDVGLASFLHQLYTTMSKRTVLNEIYKGLVESICIPAELHHKNGKRYASFGTVVPIHCCTPEEVKERVNNTHHYCDVFAEELLAPLGELAFVRLDENTAEKVFINRSKRVLIVSSDGRLAQWRCAPTFESANHYIAGTPIVNKEGALVSVVTAKRGNHYAVSNFEGEGGYFETTLPWEMVHPMQGEVIYGDQTFSSRDELRKHLANLSPAEVTSDLPVRPVLLTGVTPRITLITHNGRQLAHYYLYGVHASDVQYL	266	Eukaryota; Metazoa; Ecdysozoa; Arthropoda; Hexapoda; Insecta; Pterygota; Neoptera; Holometabola; Lepidoptera; Glossata; Ditrysia; Papilionoidea; Papilionidae; Papilioninae; Papilio
NP_689331	NP_689331.1		putative P26 [Mamestra configurata nucleopolyhedrovirus B]	Mamestra configurata nucleopolyhedrovirus B	MAWQTLTLAVTLCALTAAMTTTTYNTLYSVDHVAKTMQVHEVDGNRVNITVIPPNSDTNDDESLSMYHHFPGVATQVLFPPVTSSDDLYVQLSDGVLYKTRATRVFTNFHSHKGRMVYGQLLTIAVDDFSIAGMIYVGAPIYRDKKLVSVVTCRYDDYDAQTVMFPVSGIRPRGLVSGQFNFDDRIIVQELRRGMSVYGREQLPYQSAHMSVKQFALTTNNNKQAYRDLPRAIAVFHNVNEITIALVEGQFEIDRVRFDGPLITPQ	266	Viruses; Baculoviridae; Alphabaculovirus
YP_009011212	YP_009011212.1		p26 [Mamestra brassicae multiple nucleopolyhedrovirus]	Mamestra brassicae multiple nucleopolyhedrovirus	MAWQTLTLAVTLCALTAAMTTTTHNTLYSVDHVAKTMQVHEVDGNRVNITVIPPNSDTNDDESLSMYHHFPGVATQVLFPPVTSSDDLYVQLSNGVLYKTRATRVFTNFHSHKGRMVYGQLLTIAVDDFSIAGMIYVGAPIYRDKKLVSVVTCRYDDYDAQTVLFPVSGIRPRGLVSGQFNFDDRIIVQELRRGMSVYGREQLPYQSAHMSVKQFALTTNNNKQAYRDLPRAIAVFHNANEITIALVEGQFEIDRVRFDGPLITPQ	266	Viruses; Baculoviridae; Alphabaculovirus
AEN03946	AEN03946.1		P26 protein [Helicoverpa armigera NPV strain Australia]	Helicoverpa armigera NPV strain Australia	MLRQTCLFFAILASAIAAKSLQRYNVEYTIDNDLNRILIHKVDNRTVSINVIGHQSNDSNTLDRLHHFPGVATSVMFPRIDMTSALFVLLKNGAMARVVPEFVYTNYHVHKHRLVYSQLATFALEDRTVADMVLIGAPIFRNKKLVSVVTHRHDDRDRDAVMFPVTGIRPRNLVSGQIQFDSNNGVTPERLLTGRSVYGRRQMSYLPNERSVGIKEFALTSVANRATFRNLTRNVHIFYNDDEIVITLSEGEFEISRIRFDGPLLYK	267	Viruses; Baculoviridae; Alphabaculovirus
AF334030_91	AAL56166.1	HzSNPV	ORF21 [Helicoverpa zea single nucleopolyhedrovirus]	Helicoverpa zea single nucleopolyhedrovirus	MLRQTCLFFAILASAIGAKSLQRYNVEYTIDNDLNRILIHKVDNRTVSINVIGHQSNDSDTLDRLHHFPGVATSVMFPRIDMTSALFVLLKNGAMARVVPEFVYTNYHVHKHRLVYSQLATFALEDRTVADMVLIGAPIFRNKKLVSVVTHRHDDRDRDAVMFPVTGVRPRNLVSGQIQFDSNNGVTPERLLTGRSVYGRRQMSYLPNERSVGIKEFALTSVANRDTFRNLTRNVHIFYNDDEIVITLSEGEFEISRIRFDGPLLYK	267	Viruses; Baculoviridae; Alphabaculovirus
AGR57032	AGR57032.1		P26A [Choristoneura occidentalis alphabaculovirus]	Choristoneura occidentalis alphabaculovirus	MAMLKTFLLICVSSAALSVNVTTINNVLYTVNDTQKTIAVKQVDDKPAFIQVIPPQSFTKNQEELDMLHHFPGVASNVMFPRIANNTKLTVLLNNGSLATITVDRVYTNFHSHKNRMVYGQLYSFALSNFSLANQIYIGAPIFEKERMVSVITARHEDYKNKLVIYPVTGISARGLVSGQINFDLQILTQKLLEGSSVYGKMQLPYKALKDYAISTNRNKNLFKGLPRNVAVFYNERDITIALVEGEFEIDRIRLSGPLILRNNKQQ	267	Viruses; Baculoviridae; Alphabaculovirus
AIG63063	AIG63063.1		P26 [Helicoverpa SNPV AC53]	Helicoverpa SNPV AC53	MLRQTCMFFAILTSAIAAKSLQRYNVEYTIDNDLNRILIHKVDNRTVSINVIGHQSNDSDTLDRLHHFPGVATSVMFPRIDMTSALFVLLKNGAMARVVPEFVYTNYHVHKHRLVYSQLATFALEDRTVADMVLIGAPIFRNKKLVSVVTHRHDDRDRDAVMFPVTGVRPRNLVSGQIQFDSNNGVTPERLLTGRSVYGRRQMSYLPNERSVGIKEFALTSVANRDTFRNLTRNVHIFYNDDEIVITLSEGEFEISRIRFDGPLLYK	267	Viruses; Baculoviridae; Alphabaculovirus
AIG63200	AIG63200.1		P26 [Helicoverpa armigera SNPV]	Helicoverpa armigera SNPV	MLRQTCMFFAILASAIAAKSLQRYNVEYTIDNDLNRILIHKVDNRTVSINVIGHQSNDSDTLDRLHHFPGVATSVMFPRIDMTSALFVLLKNGAMARVVPEFVYTNYHVHKHRLVYSQLATFALEDRTVADMVLIGAPIFRNKKLVSVVTHRHDDRDRDAVMFPVTGVRPRNLVSGQIQFDSNNGVTPERLLTGRSVYGRRQMSYLPNERSVGIKEFALTSVANRDTFRNLTRNVHIFYNDDEIVITLSEGEFEISRIRFDGPLLYK	267	Viruses; Baculoviridae; Alphabaculovirus
AJP07174	AJP07174.1		p26 protein [Helicoverpa armigera nucleopolyhedrovirus]	Helicoverpa armigera nucleopolyhedrovirus	MLRQTCLFFAILASAIAAKSLQQYNVEYTIDNDLNRIFIHKVDNRTVSINVIGHQSNDSDTLDRLHHFPGVATSVMFPRIDMTSALFVLLKNGAMARVVPEFVYTNYHVHKHRLVYSQLATFALEDRTVADMVLIGAPIFRNKKLVSVVTHRHDDRDRDAVMFPVTGVRPRNLVSGQIQFDSNNGVTPERLLTGRSVYGRRQMSYLPNERSVGIKEFALTSVANRATFRNLTRNVHIFYNDDEIVITLSEGEFEISRIRFDGPLLYK	267	Viruses; Baculoviridae; Alphabaculovirus
AJP07309	AJP07309.1		p26 protein [Helicoverpa armigera nucleopolyhedrovirus]	Helicoverpa armigera nucleopolyhedrovirus	MLRQTCLFFAILASAIAAKSLQRYNVEYTIDNDLNRIFIHKVDNRTVSINVIGHQSNNSDTLDRLHHFPGVATSVMFPRIDMTSALFVLLKNGAMARVVPEFVYTNYHVHKHRLVYSQLATFALEDRTVADMVLIGAPIFRNKKLVSVVTHRHDDRDRDAVMFPVTGVRPRNLVSGQIQFDSNNGVTPERLLTGRSVYGRRQMSYLPNERSVGIKEFALTSVANRATFRNLTRNVHIFYNDDEIVITLSEGEFEISRIRFDGPLLYK	267	Viruses; Baculoviridae; Alphabaculovirus
AJP07579	AJP07579.1		p26 protein [Helicoverpa armigera nucleopolyhedrovirus]	Helicoverpa armigera nucleopolyhedrovirus	MLRQTCLFFAILASAIGAKSLQRYNVEYTIDNDLNRIFIHKVDNRTVSINVIGHQSNDSDTLDRLHHFPGVATSVMFPRIDMTSALFVLLKNGAMARVVPKFVYTNYHVHKHRLVYSQLATFALEDRTVADLVLIGAPIFRNKKLVSVVTHRHDDRDRDAVMFPVTGVRPRNLVSGQIQFDSNNGVTPERLLTGRSVYGRRQMSYLPNERSVGIKEFALTSVANRATFRNLTRNVHIFYNDDEIVITLSEGEFEISRIRFDGPLLYK	267	Viruses; Baculoviridae; Alphabaculovirus
AJP07715	AJP07715.1		p26 protein [Helicoverpa armigera nucleopolyhedrovirus]	Helicoverpa armigera nucleopolyhedrovirus	MLRQTCLFFAILASAIAAKSLQRYNVEYTIDNDLNRIFIHKVDNRTVSINVIGHQSNDSDTLDRLHHFPGVATSVMFPRIDMTSALFVLLKNGAMARVVPEFVYTNYHVHKHRLVYSQLATFALEDRTVADMVLIGAPIFRNKKLVSVVTHRHDDRDRDAVMFPVTGVRPRNLVSGQIQFDSNNGVTPERLLTGRSVYGRRQMSYLPNERSVGIKEFALTSVANRATFRNLTRNVHIFYNDDEIVITLSEGEFEISRIRFDGPLLYK	267	Viruses; Baculoviridae; Alphabaculovirus
AXU41725	AXU41725.1		P26 [Spodoptera eridania nucleopolyhedrovirus]	Spodoptera eridania nucleopolyhedrovirus	MGFASFVLVLVAVCSASPTMAAFNTKYAIDHESRTMKVYSVDDRPVSIFVIPPNSDTNGDDKLTSLHQFPGVASSVVFPSISRDDDLFVELSNGVLYKTQATLVYTNFHTHKNRMVYGQLLTFAIDEFDIASKIYVGAPIYRDGKLVSVVTCRFDDYDKGLVLFPVTGVRPAGLISGQMMFDDRVIVERLKPNMAVYGRQQLPYRSAHMSVKQFALAATVNRQLYRDLPRYAVVFYNDTDITITMVEGEFEIQRVRLDGPLITNQQG	267	Viruses; Baculoviridae; Alphabaculovirus; unclassified Alphabaculovirus
BAG74586	BAG74586.1		hypothetical protein [Helicoverpa armigera NPV NNg1]	Helicoverpa armigera NPV NNg1	MLRQTCLFFAILASAIAAKSLQRYNVEYTIDNDLNRIFIHKVDNRTVSINVIGHQSNDSDTLDRLHHFPGVATSVMFPRIDMSSALFVLLKNGAMARVVPEFVYTNYHVHKHRLVYSQLATFALEDRTVADMVLIGAPIFRNKKLVSVVTHRHDDRDRDAVMFPVTGVRPRNLVSGQIQFDSNNGVTPERLLTGRSVYGRRQMSYLPNERSVGIKEFALTSVANRDTFRNLTRNVHIFYNDDEIVITLSEGEFEISRIRFDGPLLYK	267	Viruses; Baculoviridae; Alphabaculovirus
NP_075091	NP_075091.1		p26 [Helicoverpa armigera nucleopolyhedrovirus G4]	Helicoverpa armigera nucleopolyhedrovirus G4	MLRQTCLFFAILASAIAAKSLQRYNVEYTIDNDLNRILIHKVDNRTVSINVIGHQSNDSDTLDRLHHFPGVATSVMFPRIDMTSALFVLLKNGAMARVVPEFVYTNYHVHKHRLVYSQLATFALEDRTVADMVLIGAPIFRNKKLVSVVTHRHDDRDRDAVMFPVTGIRPRNLVSGQIQFDSNNGVTPERLLTGRSVYGRRQMSYLPNERSVGIKEFALTSVANRATFRNLTRNVHIFYNDDEIVITLSEGEFEISRIRFDGPLLYK	267	Viruses; Baculoviridae; Alphabaculovirus
NP_613241	NP_613241.1		p26 [Mamestra configurata nucleopolyhedrovirus A]	Mamestra configurata nucleopolyhedrovirus A	MAWQTLTLAVTLCALAAAMTTTTHDTVYSVDHVAKTMQVHEVDGKRVSITVIPPNSDTNDDESLSMYHHFPGVATQVLFPPVTSTDDLYVQLSDGVLYKTRASRVFTNFHSHKGRMVYGQLLTIAVDDLSIAGMIYVGAPIYRDKKLVSVVTCRYDDYDAQTVLFPVSGIRPRGLVSGQFNFDDRIIVQELRRGMSVYGREQLPYQSAHMSVKQYALTTNNNKQAYRDLPRAIAVFHNANEITIALVEGQFEIDRVRFDGPLITPQK	267	Viruses; Baculoviridae; Alphabaculovirus
NP_848319	NP_848319.1		p26 [Choristoneura fumiferana multiple nucleopolyhedrovirus]	Choristoneura fumiferana multiple nucleopolyhedrovirus	MAMLKTFLLICVSSAALSVKVTTINNVLYTVNDTQKTIAVKQVDDKPAFIQVIPPQSFTKNQEELDMLHHFPGVASNVMFPRIANNTKLTVLLSDGSLATITVDRVYTNFHSHKNRMVYGQLYSFALSNFSLANQIYIGAPIFEKERMVSVITARHEDYKNKLVIYPVTGISARGLVSGQINFDLQILTQKLLEGSSVYGKMQLPYKALKDYAISTNRNKNLFKGLPRNVAVFYNERDITIALVEGEFEIDRIRLSGPLILRNIKQQ	267	Viruses; Baculoviridae; Alphabaculovirus
QBM78987	QBM78987.1		p26 [Helicoverpa armigera nucleopolyhedrovirus]	Helicoverpa armigera nucleopolyhedrovirus	MLRQTCLFFAILASAIAAKSLQRYNVEYTIDNDLNRILIHKVDNRTVSINVIGHQSNDSDTLDRLHHFPGVATSVIFPRIDMTSALFVLLKNGAMARVVPEFVYTNYHVHKHRLVYSQLATFALEDRTVADMVLIGAPIFRNKKLVSVVTHRHDDRDRDAVMFPVTGVRPRNLVSGQIQFDSNNGVTPERLLTGRSVYGRRQMSYLPNERSVGIKEFALTSVANRDTFRNLTRNVHIFYNDDEIVITLSEGEFEISRIRFDGPLLYK	267	Viruses; Baculoviridae; Alphabaculovirus
QEI03490	QEI03490.1		P26-A [Spodoptera cosmioides nucleopolyhedrovirus]	Spodoptera cosmioides nucleopolyhedrovirus	MMGFSSFVLLVVCCSTSLTMAAFNVKYAIDHEARTMTVQSVDDKPVSIFVIPPNSDTNGDDKLTSLHQFPGVASSVVFPSISRDDDLFVELNNGILYKTQATRVYTNFHTHKNRMVYGQLLTFAIDEFDLANKIYVGAPIYRDGKLVSVVTCRFDDYDKGLVLFPVTGVRPAGLISGQMMVDDRVIVEKMKPDMSVYGRQQLPYRSAHMSVKQFALAVTVNRQLYRDLPRFAVVFHNDTDITITMVEGEFEMYRVRLDGPLITNQQG	267	Viruses; Baculoviridae; Alphabaculovirus; unclassified Alphabaculovirus
YP_002332831	YP_002332831.1		P26 [Spodoptera litura nucleopolyhedrovirus II]	Spodoptera litura nucleopolyhedrovirus II	MGFASFVLVLVAVCSASPTMAAFNTKYAIDHESRTMKVYSVDDRPVSIFVIPPNSDTNGDDKLTSLHQFPGVASSVVFPSISRDDDLFVELSNGVLYKTQATLVYTNFHTHKNRMVYGQLLTFAIDEFDIANKIYVGAPIYRDGKLVSVVTCRFDDYDKGLVLFPVTGVRPAGLISGQMMFDDRVIVERLKPNMAVYGRQQLPYRSAHMSAKQFALAATVNRQLYRDLPRYAVVFYNDTDITITMVEGEFEIHRVRLDGPLITNQQG	267	Viruses; Baculoviridae; Alphabaculovirus; unclassified Alphabaculovirus
YP_008378498	YP_008378498.1		P26A [Choristoneura rosaceana nucleopolyhedrovirus]	Choristoneura rosaceana nucleopolyhedrovirus	MAMLKTFLLICVSSAALSVKVTTINNVLYTVNDTQKTIAVKQVDDKPAFIQVIPPQSFTKNQEELDMLHHFPGVASNVMFPRIANNTKLTVLLNDGSLATITVDRVYTNFHSHKNRMIYGQLYSFALSNFSLANQIYIGAPIFEKERMVSVITARHEDYKNKLVIYPVTGISARGLVSGQINFDLQILTQKLLEGSSVYGKMQLPYKALKDYAISTNRNKNLFKCLPRNVAVFHNERDITIALVEGEFEIDRIRLSGPLILRNNIQQ	267	Viruses; Baculoviridae; Alphabaculovirus
AKD28026	AKD28026.1		IV structural protein P26 [Glypta fumiferanae]	Glypta fumiferanae	MAEGFEFAGVQFTFNNGNKTAKVFRHRDLPVDVHILPANTNEITRAARAHLRPETSLHQFPAVATSYIFPAVVAGENIKVIRNDGTALQAALTTTRVLFHAYGRRLIWSQLLAFVVETRDEADSIYQGSPIFRASDNAFVSVITHREQMFLETSSGEKIFSGYVFPVTGLKPKNFVSGETEIYPGGSFVVRKIEDGMSVYGMQMLPYAEIKAFAQSIQFVPSCNLPRNTAVYHNRFETNVRPRRRQTRNFQVPRVLSAVKNLLTCPRF	268	Eukaryota; Metazoa; Ecdysozoa; Arthropoda; Hexapoda; Insecta; Pterygota; Neoptera; Holometabola; Hymenoptera; Apocrita; Terebrantes; Ichneumonoidea; Ichneumonidae; Banchinae; Glypta
NP_818678	NP_818678.1		P26 [Adoxophyes honmai nucleopolyhedrovirus]	Adoxophyes honmai nucleopolyhedrovirus	MIQSIVTLLCLALIATPGTALTVNNVEYTINHLEKTITVTQVDEKTCIIKTFPPLGSTDNQEEYDMLHHFPGVATSVLFPSIKNSSMLSVLLNDGTTFSAVADKVYTNFHSHKKRMVYGQLLSFAVEDLNLANKIYIGAPIFLNNKLISVVTARHDNYEEGLVIYPVTGIRPDNLVSGQFNFDDQIIVTQFVKGMSVYGKRQLPYMALKRHAINISANKKLYRNMPRSVAVFYNDRDITIALVEGEYEIDRIRLNGPLLAGHTPTPSI	268	Viruses; Baculoviridae; Alphabaculovirus
XP_013143912	XP_013143912.1	common Mormon	PREDICTED: uncharacterized protein LOC106107572 isoform X1 [Papilio polytes]	Papilio polytes	MDLRVKALYLVVFSTTFNIILADECTTMSKRTVLNEVYKGLVESMSIPAEVHHRNGKKYASFGTVVPIHCCTPEQVKERVNDTHHYCDVFTEELLAPLGELAFVRLDENTAEKVFINRSKRVLMVSSDGRLAQWRCAPTFESANHYIAGTPIVNKEGALVSVVTAKRGNHYAVSNFEGEGGYFETSLPWEIVHPMQGEVIYGEQTFSSRDELRKHLANLSPAEVTSDLPVRPVLLTGVTPRLTLITHNGRQLAHYYLYGVHASDVQYL	268	Eukaryota; Metazoa; Ecdysozoa; Arthropoda; Hexapoda; Insecta; Pterygota; Neoptera; Holometabola; Lepidoptera; Glossata; Ditrysia; Papilionoidea; Papilionidae; Papilioninae; Papilio
YP_002300548	YP_002300548.1		P26 [Adoxophyes orana nucleopolyhedrovirus]	Adoxophyes orana nucleopolyhedrovirus	MIQSIVTLLCLALIATPGTALTVNNVEYTINHLEKTITVTQVDEKTCIIKTFPPLGSTGDQEEYDMLHHFPGVATSVLFPSIKNNSMLSVLLNDGTTFSAVADRVYTNFHSHKKRMVYGQLLSFAIEDFNLANKIYIGAPIFLNNKLISVVTARHDNYKEGWVIYPVTGIRPDNLVSGQFNFDNQIIVTQFVKGMSVYGKRQLPYMALKRYAINTSANKKLYRNMPRSVAVFYNDQDITIALVEGEYEIDRIRLNGPLLAGYTPTPSI	268	Viruses; Baculoviridae; Alphabaculovirus; unclassified Alphabaculovirus
AXS67674	AXS67674.1		p26 [Cryptophlebia peltastica nucleopolyhedrovirus]	Cryptophlebia peltastica nucleopolyhedrovirus	MIIKRTMTFLLLLLLCIRNGQNLEINNVNYEKNELKKTVTITKVDGQESFIKIIAPMSRVHDEEYGLLHQFPGVASNIVFPKVSNNSALDVLLNNGDLASFTVDRVYANFHIHKQRLIYGQMYAFALTDFSLANKIYLGAPVFRENRLISVITCRHNDYKNGLVIFPITGIRPEKLVSGQMNFDKSVSFHKFLQGMSVYGTKQLPYVGDSSFMLKRYALTVDQNKNTYRDLPRNINVFYNDHEIVITLSEGEYEIDRVRFDGPLISYNT	269	Viruses; Baculoviridae; Alphabaculovirus; unclassified Alphabaculovirus
AYN45077	AYN45077.1		p26b [Spodoptera exigua multiple nucleopolyhedrovirus]	Spodoptera exigua multiple nucleopolyhedrovirus	MYLKTLSVVLLYLSTKLTMAANVKYEIDHDKRIIQIKSVNDQAVSVTVIPPNSNNDDDNLSMLHHFPGVATSVTFPPISPDDALYVQLNNGVLYRVYADRVYTNFHTHKKRLIYGQLLTFAVDDFSISSKIYVGAPIYRDNVLVSVITCRYDDYDADLVMFPVTGIRAHGLVSGQINYDSDNIIVEKLKPEMSVYGRRQLPYKSAHMSVKHFALSTHMNREIYRNLPRLVSIFYNEKEVSIGAVEGEFEMFRVRLDGPLITDQEKEQEE	269	Viruses; Baculoviridae; Alphabaculovirus
YP_002268179	YP_002268179.1	AgipMNPV	P26 [Agrotis ipsilon multiple nucleopolyhedrovirus]	Agrotis ipsilon multiple nucleopolyhedrovirus	MASATASMLVWAICSAATMAAMATPNNVKYTVNHEARTMQVHTVDDRPVSIHVIPPNSETNGDDKLSVLHQFPGVATDVLFPAISADDVLFVQLSNGVLYQTRASRVYTNFHTHKGRMVYGQLRTFVLDDFEIASQIYIGAPIYLNHKLVSVVTCRFDDYEAGLVMFPVTGIRSRGLVSGQFNIDDRVIVQELRPNMSVYGRQQLPYDSAHMSVKQFALSTNANRQAYRDLPRAVAVFHNKREITMALVEGEFEVDRLRFDGPLITAQRYEE	272	Viruses; Baculoviridae; Alphabaculovirus
QAT90415	QAT90415.1		P26 [Spodoptera exempta nucleopolyhedrovirus]	Spodoptera exempta nucleopolyhedrovirus	MDPRILSVLIAILSTTTTTMAANVEYEIDHDKQIMQIKSVNDQAVSVVIIPPNGNNDDDKLSMLHHFPGVATSVTFPPLSPDDALYVQLSNGVLYRVFADRVYTNFHTHKKRLIYGQLLAFTVDDFSIASKIYIGAPIYRNNVLVSVITCRYYDYDADLVMFPVTGVRPHGLVSGQIVYDNDHVFVEKLRADMSVYGRRQLPYQSAHMSVKHFALSTHMNREIYRNLPRSVMIFHNEKEVSVAVVEGEFEMFRVRLDGPLITNQEKEKDDDMK	273	Viruses; Baculoviridae; Alphabaculovirus; unclassified Alphabaculovirus
QBI90242	QBI90242.1	TnSNPV	p26 [Trichoplusia ni single nucleopolyhedrovirus]	Trichoplusia ni single nucleopolyhedrovirus	MLTMASATTATPSTSLTKTAKTKFNVQYDIDENEKRIRVLAVDGKTVRIETIRPHSDSENIKSADDQLPLSVLHHFPGVASEIVFPAIENPNDSLLVLLNDGILFKVEPTRVYTNFHKHANRLIYGQLRTFAIDDLWIAEKIWIGAPIFSNGRLVSVITCRYDDYDAGIVLFPVSGIRPKGLVSGQINYDSTVYVSSLRDGMSVYGKRQMAYSSPYMTVKKFALSTTANRLTYRDLPRNVAIFHNKNEISISLVEGEYEIDRIRLDGPLIVPQ	273	Viruses; Baculoviridae; Alphabaculovirus
XP_021193734	XP_021193734.1	cotton bollworm	uncharacterized protein LOC110378694 isoform X1 [Helicoverpa armigera]	Helicoverpa armigera	MAVVYLIVFLSALSSALTANLNARMSQRTGFPTSNGPAGLTYRGLVERMAIPAELHRRADGRQYASFGDARPIHCCTPEQVEKLSQTTHHYCDIFTEQLLAPLGELGYVRIDENTAEKVFINRSKRLLVVSSDGVLAQWRLAPTFESANLYVAGTPVVNQAGELVSLVTAKRGNHYAVSTFEGEGGYFDTSEAWQVRDIPEGRGVYGDRTFPSRDELRAYVSSLPPIDAPPTGPPTPILWRGATPRLVLLAKNGRQISHQYLHGVSADNIEYL	273	Eukaryota; Metazoa; Ecdysozoa; Arthropoda; Hexapoda; Insecta; Pterygota; Neoptera; Holometabola; Lepidoptera; Glossata; Ditrysia; Noctuoidea; Noctuidae; Heliothinae; Helicoverpa
WP_143442117	WP_143442117.1		hypothetical protein [Klebsiella pneumoniae]	Klebsiella pneumoniae	MYFKKVIYFMIINILYVTRAEIKTVYNVDYVIDETTKTIKVVSVDKQLSNIIVVPANGQTNRHEQYDAMHHYPGVVSDVILPGVPNERTIMHVLLNDGTLVRAVGEHVYTNFHTHKERMIYGQLRTFALEDFSLVDKIYLGAPIFVNKKLVSVITCRYDDYTNGLVMYPVTGARSKGLISGQINYDDKVIVNVLKPSMSVYGRNQLPYSPNSINAVSIKRLAISVGNNRQIYRDLPRSVAIFHNEKDISIGLVEGDFEIDRIRFDGPMVVPQSI	274	Bacteria; Proteobacteria; Gammaproteobacteria; Enterobacterales; Enterobacteriaceae; Klebsiella
WP_143445106	WP_143445106.1		hypothetical protein [Klebsiella pneumoniae]	Klebsiella pneumoniae	MYFKKVIYFMIINILYVTRAEIKTVYNVDYVIDETTKTIKVVSVDKQLSNIIVVPANGQTNRHEQYDVMHHYPGVVSDVILPGVPNERTIMHVLLNDGTLVRAVGEHVYTNFHTHKERMIYGQLRTFALEDFSLADKIYLGAPIFVNKKLVSVITCRYDDYTNGLVMYPVTGARSKGLISGQINYDDKVIVNVLKPSMSVYGRNQLPYSPNSINAVSIKRLAISVGNNRQIYRDLPRSVAIFHNEKDISIGLVEGDFEIDRIRFDGPMVVPQSI	274	Bacteria; Proteobacteria; Gammaproteobacteria; Enterobacterales; Enterobacteriaceae; Klebsiella
XP_022831421	XP_022831421.1		uncharacterized protein LOC111359938 isoform X2 [Spodoptera litura]	Spodoptera litura	MYSGSVEDKSIIILKQVNLKVTTMSKRTGFPNTTAPAAAGLTYRGIVENMSIPAELHQRPDGRPYATFGSVVPIHCCTPEQVEQHRKTTHHYCDIFTDETLAPLGDLVYVRIDENTAEKVFINRRQRVLLVSSDGVLAQWRLAPTFESANLYLAGTPIVDQAGHLVSVVTAKWGRHYAVSAIEGEGGYFDTSLPWETLTIPEGSSVYGNRTFQSRDELREYVASLPPAGSPAAGEVSPLLYRGDSPRLVLVSPSGRQLSHHYLHGVIANDVEYL	274	Eukaryota; Metazoa; Ecdysozoa; Arthropoda; Hexapoda; Insecta; Pterygota; Neoptera; Holometabola; Lepidoptera; Glossata; Ditrysia; Noctuoidea; Noctuidae; Amphipyrinae; Spodoptera
YP_006607871	YP_006607871.1		p26-a [Apocheima cinerarium nucleopolyhedrovirus]	Apocheima cinerarium nucleopolyhedrovirus	MHFIKVIFLMTINILYLTTAEIKTIYNVDYVIDEATKTIKIVSVDKQPSNIIIVTPNGHTNRHEQYDVMHHYPGVVSDVILPGVPNERSIMHVLLNDGTLVRAVGEHVYTNFHTHKERMIYGQLRTFALDDFSLADKIYLGAPVFVDKKLVSVITCRYDDYTNGLVMYPVTGTRSKGLISGQINYDDKVIVNVLRPSMSVYGRNQLPYSPDSINAVSIKRLAISVSNNRQIYRDLPRSVVVFHNENDIFINLVEGDFEIEKIRFDGPMVVPQSI	274	Viruses; Baculoviridae; Alphabaculovirus; unclassified Alphabaculovirus
YP_009002595	YP_009002595.1		hypothetical protein [Inachis io cypovirus 2]	Inachis io cypovirus 2	MQRMQLVNKQNLINYIAHSIIEEGLVDDVEAGASKNHLPKMPNPSDIEKAKLNPYHEVKDETRKDDIKENLVLATNETAFLAKTRHHYTGFYSKHILKPVPSDGIVMVNDTPYKTGSVKKVANAQKNGESTIITFEPCLFTTDNLPAGSIVKDAEGGEYGMITSHYEAFNKRKAYPIQNAFEYPSIMVSVPCEHRVKEKLMAYADKQFDKKGDLVAYIESLGPKPDIGAIIYTDKYNKNPQLVVHANGHQIINMHLRKRIVGSFIAKAPYQPDN	274	Viruses; Riboviria; Orthornavirae; Duplornaviricota; Resentoviricetes; Reovirales; Reoviridae; Spinareovirinae; Cypovirus
YP_009666799	YP_009666799.1		P26 [Mythimna unipuncta nucleopolyhedrovirus]	Mythimna unipuncta nucleopolyhedrovirus	MISAFSFALILMAAAATTTSSLSISSPTMEEIYNVKFSVDHSKRTMRVVSVDNEDVLVKVVPPHGATNGADEYSLAHQFPGVVTQVMFPAVSRDDDLYVMLSNGVLMRTHATRVYANFHVHSNRFIYGQLLSFVVDDFSLAAKIYIGAPIFRNKKLVSVVTCRYDEYDEGVVVFPVSGVRPRRLVSGQYMFDDRVVVQELRENNSVYGRRQLPYASVKNFAIAADNNRNEHRDLPRIVGVFYNERDVTVTLSEGDFEIDRVRFDGPLIVPQEEK	274	Viruses; Baculoviridae; Alphabaculovirus
YP_529812	YP_529812.1		P26 [Agrotis segetum nucleopolyhedrovirus A]	Agrotis segetum nucleopolyhedrovirus A	MTSASICATFVACAWLISVAMAAPNVLYTVNDEARTIKVHTVDNSPVSVNVIPPGGNTNGDDRLSALHQFPGVATDVLFPAVSADDVLFVQLSNGVLFRTRATRVLVNFHTHKNRMIYGQLLSFEVDDFEVANKIYIGAPIYRNYKLVSVVTCRYDDFEAGLVLFPVTGIRPRGLVSGQFNFDGGNVLVQQLRPNMSVYGKQQLPYNSAHMSVKQFALTTSANKQAYRDLPRTIAVFHNQREITIALVEGEFEIDRVRFDGPLVVDQTKNGDGEK	275	Viruses; Baculoviridae; Alphabaculovirus
CDG73033	CDG73033.1		p26 (Ac136) [Spodoptera exigua multiple nucleopolyhedrovirus]	Spodoptera exigua multiple nucleopolyhedrovirus	MMSFASFLLVLICSASSTMAAFNVKYVVDHEARTMIVQSVDGRPVSIFVIPPNSDTNGDDKLTWLHQFPGVATSVAFPSISQNDDLLVQLNNGVLYKTRATRVYTNFHTHKNRMVYGQLLTFAVDEFDIANKIYVGAPIFRAGEMVSVVTCRFDDYEKGLVVFPVAGMRPAGLISGQMMFDDRVIVKKLKADMAVYGRQQLPYSSAHMSAKQFAMAATVNRQLYRDLPRYAVVFHNNTDITITMVEGEFEMYRVRLDGPLITNQNKDDDDDSIGNIV	277	Viruses; Baculoviridae; Alphabaculovirus
CDG73170	CDG73170.1		p26 (Ac136) [Spodoptera exigua multiple nucleopolyhedrovirus]	Spodoptera exigua multiple nucleopolyhedrovirus	MMSFASFLLVLICSASSTMAAFNVKYVVDHEARTMIVQSVDGRPVSIFVIPPNSDTNGDDKLTWLHQFPGVATSVAFPSISQNDDLLVQLNNGVLYKTRATRVYTNFHTHKNRMVYGQLLTFAVDEFDIANKIYVGAPIFRAGEMVSVVTCRFDDYEKGLVVFPVAGMRPAGLISSQMMFDDRVIVKKLKADMAVYGRQQLPYSSAHMSAKQFAMAATVNRQLYRDLPRYAVVFHNNTDITITMVEGEFEMYRVRLDGPLITNQNKDDDDDSIGNIV	277	Viruses; Baculoviridae; Alphabaculovirus
ACB32174	ACB32174.1		P26 [Ampelophaga rubiginosa nucleopolyhedrovirus]	Ampelophaga rubiginosa nucleopolyhedrovirus	MSSTIFKTLAIYILYAMIASSQAHDTNVIHNVIYTVNDVQRTINIQMVDGKEAQIVVIPPHSNTNNDDRLDMLHHFPGVATDIILPPIQANDMVEILLNDHVLWRTGVDANVFTNYHTHKNRLVFGQLRAVVVKDFTLADQIYIGAPVFKEKRLISVITCRFDDYTNQQVIFPLTGLRTAGLVSGQINYDDSVTVQQLKPGLSVYGRRQLPYKSNEALGQANIKRFAISTQNNRLAYRDLPRNVVFFHDQHNITITINENEFEIARFRFDGPLILPQN	278	Viruses; Baculoviridae; Alphabaculovirus; unclassified Alphabaculovirus
NP_037889	NP_037889.1		ORF129 p26 [Spodoptera exigua multiple nucleopolyhedrovirus]	Spodoptera exigua multiple nucleopolyhedrovirus	MMGFASFLLVLICSASSTMAAFNVKYVVDHEARTMIVQSVDGRPVSIFVIPPNSDTNGDDKLTWLHQFPGVATSVAFPSISQNDDLLVQLNNGVLYKTRATRVYTNFHTHKNRMVYGQLLTFAVDEFDIANKIYVGAPIFRAGEMVSVVTCRFDDYEKGLVVFPVAGMRPAGLISGQMMFDDRVIVKKLKADMAVYGRQQLPYSSAHMSAKQFAMAATVNRQLYRDLPRYAVVFHNNTDITITMVEGEFEMYRVRLDGPLITNQNKDDDDDDSIGNIV	278	Viruses; Baculoviridae; Alphabaculovirus
YP_001650930	YP_001650930.1		p26-a [Orgyia leucostigma nucleopolyhedrovirus]	Orgyia leucostigma nucleopolyhedrovirus	MNMVWSDRVILLVVTAITMLAIDAAALSVGNVKYSIDRATKTIDVYSVNNASSVFKIVEPGGRAPPDERFDAMHHFPGVITNTVLIGAQDVHTNLNVLLANEKLLQITPTRVYVNYHTHKQRMVYGQLRAFVLDDFELANQVYIGAPILSADGDLVSVVTCRFDDYRDGVVVFPVSGVRSPGLTSGQIQFDDKVTVNELDATMSVYGRMQLPYNVDSTHELNVKRFAISINNNRRMYRDWPRTVVVFHNRRDVTISLVEGEFEMFKMRLDGPLLRSQL	278	Viruses; Baculoviridae; Alphabaculovirus
ACA02687	ACA02687.1		P26 [Spodoptera frugiperda multiple nucleopolyhedrovirus]	Spodoptera frugiperda multiple nucleopolyhedrovirus	MYKMISVLEILVVAFTLCVSTSPLSTMATFNVKYTVDHETKRINVNSVLDAPVSIHVIPPNSDTNGDEKLTLLHQFPGVATNIIFPSITKDDDLYVQLNNGVLYKTRATRVYTNFHTHKNRMVYGQLYTIAVDDFEIANKIYIGAPIYRNKQLVSVITCRFDDYEAGLVMYPVTGIRPQGLISGQIQYDDRVGVETLRPSMSVYGRQQLPYKSAHMSVKQFAMTADMNRQLYRDLPRSVMLFHNNKEITITVVEGEFEMYRIRLDGPLVTNQESSNEEK	279	Viruses; Baculoviridae; Alphabaculovirus
CDG72470	CDG72470.1		p26 (Ac136) [Spodoptera exigua multiple nucleopolyhedrovirus]	Spodoptera exigua multiple nucleopolyhedrovirus	MMSFASFLLVLICSASSTMAAFNVKYVVDHEARTMIVQSVDGRPVSIFVIPPNSDTNGDDKLTWLHQFPGVATSVAFPSISQNDDLLVQLNNGVLYKTRATRVYTNFHTHKNRMVYGQLLTFAVDEFDIANKIYVGAPIFRAGEMVSVVTCRFDDYEKGLVVFPVAGMRPAGLISGQMMFDDRVIVKKLKADMAVYGRQQLPYSSAHMSAKQFAMAATVNRQLYRDLPRYAVVFHNNTDITITMVEGEFEMYRVRLDGPLITNQNKDDDDNDDSIGNIV	279	Viruses; Baculoviridae; Alphabaculovirus
XP_022120734	XP_022120734.1	cabbage white	uncharacterized protein LOC110997070 isoform X1 [Pieris rapae]	Pieris rapae	MVLSIVLFVLVTSADVSEDFHILSHTEPLSPRSVQNKSDDMSQRTVLNEQYKGLVERMSVPVELHEREGRRYATCASLVPIHCCTTEQKAELSVSTHHYCDVFTEQVLAHLAELAYVRLDADTAEKVFLNRTKRILLVSSDGKLAQWRCAPTFESANNYIAGAPIVNKDGSIVSIVTAKRGNHYAVSNAEGEGGYFETSKPWEIIDTGDAKFVYADKTFSTREELRAYINSLPPASLASPPRPLLIRGNSPRVALVAENGRQLVHIYLSGVLVNDVQYL	279	Eukaryota; Metazoa; Ecdysozoa; Arthropoda; Hexapoda; Insecta; Pterygota; Neoptera; Holometabola; Lepidoptera; Glossata; Ditrysia; Papilionoidea; Pieridae; Pierinae; Pieris
XP_022831420	XP_022831420.1		uncharacterized protein LOC111359938 isoform X1 [Spodoptera litura]	Spodoptera litura	MVALLYSLVVLWVVNVCHSSLLTRTVTTMSKRTGFPNTTAPAAAGLTYRGIVENMSIPAELHQRPDGRPYATFGSVVPIHCCTPEQVEQHRKTTHHYCDIFTDETLAPLGDLVYVRIDENTAEKVFINRRQRVLLVSSDGVLAQWRLAPTFESANLYLAGTPIVDQAGHLVSVVTAKWGRHYAVSAIEGEGGYFDTSLPWETLTIPEGSSVYGNRTFQSRDELREYVASLPPAGSPAAGEVSPLLYRGDSPRLVLVSPSGRQLSHHYLHGVIANDVEYL	279	Eukaryota; Metazoa; Ecdysozoa; Arthropoda; Hexapoda; Insecta; Pterygota; Neoptera; Holometabola; Lepidoptera; Glossata; Ditrysia; Noctuoidea; Noctuidae; Amphipyrinae; Spodoptera
YP_001036423	YP_001036423.1		p26b [Spodoptera frugiperda multiple nucleopolyhedrovirus]	Spodoptera frugiperda multiple nucleopolyhedrovirus	MYKMISVLEILVVAFTLCVSTSPLSTMATFNVKYTVDHETKRINVNSVLDAPVSIHVIPPNSDTNGDEKLTLLHQFPGVATNVIFPSITKDDDLYVQLNNGVLYKTRATRVYTNFHTHKNRMVYGQLYTIAVDDFEIANKIYIGAPIYRNKQLVSVITCRFDDYEAGLVMYPVTGIRPQGLISGQIQYDDRVGVETLRPSMSVYGRQQLPYKSAHMSVKQFAMTADMNRQLYRDLPRSVMLFHNNKEITITVVEGEFEMYRIRLDGPLVTNQESSNEEK	279	Viruses; Baculoviridae; Alphabaculovirus
AF358416_3	AAK51839.1		p26 protein [Trichoplusia ni single nucleopolyhedrovirus]	Trichoplusia ni single nucleopolyhedrovirus	MIQSQFILSFMLTIASASMASTPTTTRRTKLNVEYSIDENEKIIRVVAVDGKAVRIETIRPHSDSNYIKTGDDQPPLSVLHHFPGVAAILCSGIDNSNDSLRVLLNDGILFRVQPGHVYTNFHRHANRLIYGQLRTFAVDDLWIADKIWIGAPIFFNDRLVSVITCRYDDYDAGIVLFPVSGIRPKGLVSGQINYDSTVYVSLLRNGMSVYGKRQMAYSSPYMTVKKFALSTTANRLTYRDLPRNIAIFHNKKERKPSLWWKANTKYTDLDWTAPLIVPQ	280	Viruses; Baculoviridae; Alphabaculovirus
YP_009112700	YP_009112700.1	AgseNPV-B	p26b [Agrotis segetum nucleopolyhedrovirus B]	Agrotis segetum nucleopolyhedrovirus B	MMQMISALYKNGERDRFNVIISHLLDGDGSDGDAEQRAIYRQSRGANHASAHCRRQAGVDSRDSAEQRYQRRRQAHRAAPVSGRRYRRSVSRRFGGRRAFVQLGNGVLYQTRASRVYTNFHTHKNRMIYGQLRTFAVDDFEIASQIYIGAPIYLNYKLVSVVTCRFDDYEAGLVMFPVTGIRSRGLVSGQFNIDDRVIVQELRPNMSVYGRQQLPYDSAHMSVKKFALSTNANRLAYRDLPRAVAVFHNEREITMALVEGEFEVDRLRFDGPLITAQQRSEE	282	Viruses; Baculoviridae; Alphabaculovirus
AOL56456	AOL56456.1		P26a [Chrysodeixis includens nucleopolyhedrovirus]	Chrysodeixis includens nucleopolyhedrovirus	MIQSQLILSLMLTIASTSIMSTQTTRTVTTKSKFNVEYSVDENEKKIRVVAVDGKTVRIETVRPHSDTNDIKTADDQLPLSALHHFPGAVSEIVFPAIDNSNDSLMVLLNDGILLKVEPTHIYTNFHKHDNRLIYGQLRTFAVDDLWIAEKIYIGAPIFFNNRLVSVVTCRYDDYDAGIVLFPVSGIRPKGLVSGQINYDSNVYVNSLRNGMSVYGKRQMAYSSPYMSVKKFALSTAANRLTYRDLPRNVAIFHNKKEITISLVEGEYEITRIRLDGPLIVPE	283	Viruses; Baculoviridae; Alphabaculovirus
AOL57023	AOL57023.1		P26a [Chrysodeixis includens nucleopolyhedrovirus]	Chrysodeixis includens nucleopolyhedrovirus	MIQSQLILSLMLTIASTSIMSTQTTRTVTTKSKFNVEYSVDENEKKIRVVAVDGKTVRIETVRPHSDTNDIKTADDQLPLSALHHFPGAVSEIVFPAIDNSNDSLMVLLNDGILLKVEPTHVYTNFHKHDNRLIYGQLRTFAVDDLWIAEKIYIGAPIFFNNRLVSVVTCRYDDYDAGIVLFPVSGIRPKGLVSGQINYDSNVYVNSLRNEMSVYGKRQMAYSSPYMSVKKFALSTAANRLTYRDLPRNVAIFHNKKEITISLVEGEYEITRIRFDGPLIVPE	283	Viruses; Baculoviridae; Alphabaculovirus
QGW49432	QGW49432.1		P26a [Chrysodeixis includens nucleopolyhedrovirus]	Chrysodeixis includens nucleopolyhedrovirus	MIQSQLILSLMLTIASTSIMSTQTTRTVTTKSKFNVEYSVDENEKKIRVVAVDGKTVRIETVRPHSDTNDIKTADDQLPLSALHHFPGAVSEIVFPAIDNSNDSLMVLLNDGILLKVEPTHIYTNFHKHDNRLIYGQLRTFAVDDLWIAEKIYIGAPIFFNNRLVSVVTCRYDDYDAGIVLFPVSGIRPKGLVSGQINYDSNVYVNSLRNEMSVYGKRQMAYSSPYMSVKKFALSTAANRLTYRDLPRNVAIFHNKKEITISLVEGEYEITRIRLDGPLIVPE	283	Viruses; Baculoviridae; Alphabaculovirus
QGW49572	QGW49572.1		P26a [Chrysodeixis includens nucleopolyhedrovirus]	Chrysodeixis includens nucleopolyhedrovirus	MIQSQLILSLMLTIASTSIMSTQTTRTVTTKSKFNVEYSVDENEKKIRVVAVDGKTVRIETVRPHSDTNDIKTADDQLPLSALHHFPGAVSEIVFPAIDNSNDSLMVLLNDGILLKVEPTHIYTNFHKHDNRLIYGQLRTFAVDDLWIAEKIYIGAPIFFNNRLVSVVTCRYDDYDAGIVLFPVSGIRPKGLVSGQINYDSNVYVNSLRNGMSVYGKRQMAYSSPYMSVKKFALSTAANRLTYRDLPRNVAIFHNKKEITISLVEGEYEITRIRFDGPLIVPE	283	Viruses; Baculoviridae; Alphabaculovirus
YP_308908	YP_308908.1		orf19 [Trichoplusia ni single nucleopolyhedrovirus]	Trichoplusia ni single nucleopolyhedrovirus	MIQSQLILSLMLTMASATTATPSTSLTKTAKTKFNVQYDIDENEKRIRVLAVDGKTVRIETIRPHSDSENIKSADDQLPLSVLHHFPGVASEIVFPAIENPNDSLLVLLNDGILFKVEPTRVYINFHKHANRLIYGQLRTFAIDDLWIAEKIWIGAPIFSNGRLVSVITCRYDDYDAGIVLFPVSGIRPKGLVSGQINYDSTVYVSSLRDGMSVYGKRQMAYSSPYMTVKKFALSTTANRLTYRDLPRNVAIFYNKNEISISLVEGEYEIDRIRLDGPLIVPQ	283	Viruses; Baculoviridae; Alphabaculovirus
YP_009116933	YP_009116933.1	PsinSNPV-IE	P26a [Pseudoplusia includens SNPV IE]	Pseudoplusia includens SNPV IE	MIQSQLILSLMLTIASTSIMSTQTTRTVTTKSKFNVEYSVDENEKKIRVVAVDGKTVRIETVRPHSDTNDIKTADDQLPLSALHHFPGAVSEIVFPAIDNSNDSLMVLLNDGILLKVEPTHVYTNFHKHDNRLIYGQLRTFAVDDLWIAEKIYIGAPIFFNNRLVSVVTCRYDDYDAGIVLFPVSGIRPKGLVSGQINYDSNVYVNSLRNGMSVYGKRQMAYSSPYMSVKKFALSTAANRLTYRDLPRNVAIFHNKKEITISLVEGEYEITRIRFDGPLIVPE	283	Viruses; Baculoviridae; Alphabaculovirus
YP_009250006	YP_009250006.2		P26a [Urbanus proteus nucleopolyhedrovirus]	Urbanus proteus nucleopolyhedrovirus	MCCTKQIAVLLFLCAAAAHSKVHLNAYRVKCSVDHDTKKIDIDQINGQNYNFVVVPPHQETTASDLFDYYHQFPGLVTDYNFHSFNINDTLKVLLSDGKFLHVLAHDKVLFNFHVHKNRMIFGQMVSFSVNDRSIASKIYVGAPVFRALDHKLVSVITCNELVHKTDGERVIFPLTGVRHEHLSSGHVSFDGEYVVSQKVHGLSIYGRQQLPYTNNELYHTNVKQYAINIMNNQRVYRNDPRTVTVYYDDEEIDLVLTEGEFEIMRFRIDGGLVNAIQNISKI	283	Viruses; Baculoviridae
ANS70918	ANS70918.1		protein p26 [Lymantria dispar multiple nucleopolyhedrovirus]	Lymantria dispar multiple nucleopolyhedrovirus	MKSMMSFLLLLSLLSLCGFAAAGADDHNVPVNYAVDKDSRTIFVNFVNNRRVDIRVISPFERLSASMIAAAATTTTASQQNYYYPGVMSDVSFSPMVGIDDELQILLANGTLFRTTIASDEFVSYHVHARRIVLGRVPVFAVHDFALAEQIWSGAPVFKKKDGGGLDFTSVVSRRFDDYANDRVLFPVVGANDAIAVSVDRDFVEVRALAPAHSVYGTRAFPDAESRKRFEASVADGRSFRDWPRVGTLFHDAASPRTVFTLTEGDFEILNVQLPGVLLLTSQT	284	Viruses; Baculoviridae; Alphabaculovirus
YP_009186701	YP_009186701.1		p26-1 [Sucra jujuba nucleopolyhedrovirus]	Sucra jujuba nucleopolyhedrovirus	MCQYQLLVASLLVINFSPNVLASNLSFNDSAINNVRYTIDHLTKTIDIHNVNDSNVNIVIVPPHSVASRREHNLDNFHQFPGVASDIVFSGVKKNDVIHVLLSNGVLYRTTSDRVYTNFHVDKHRMIYGQLPTFATDDFSLADKIYIGAPIFRNGKLASVITCRFDDYKNGLVLFPVSGVRTQDLVSGQIHFDESVFVKKLLPDMSVYGRKQLPYRQNNDLQNHTSTLNVKRFALAATNNRQMYRDWPRSVVVFYNDRNIFISLVEGEFEINRVRFSGPLIEPQQ	285	Viruses; Baculoviridae; Alphabaculovirus
YP_008378238	YP_008378238.1		p26-a [Hemileuca sp. nucleopolyhedrovirus]	Hemileuca sp. nucleopolyhedrovirus	MYYYTLLTLSCLISHFSVAKSNSGGITVTTTEETIKNIYNINYRVDHETKTMKIVKVNEIAADIRVFPPNGFTNFHEQLDIMYHYPGVASNVVLTGVPTSNGVVLQVLLDDGLLLRVVPERVYVNFHVHKQRLIYGQLYTFALDDFALAAKIYTGAPIFHGDKLVSVITCRYDEYNESLVVYPVTGARASGLVSGEINFDDKVVVSEWEEGADSKIYGRTQLLGSSPTNAQRFVMSSRNNRQMYRDWPRTAIVFHNRRDVSIGLVEGEFEISRVVFEGPLIVPQDK	286	Viruses; Baculoviridae; Alphabaculovirus; Hemileuca species nucleopolyhedrovirus
YP_009165631	YP_009165631.1		P26-1 [Perigonia lusca single nucleopolyhedrovirus]	Perigonia lusca single nucleopolyhedrovirus	MVNVVTILLMSLTTMLTVTADTHSASPTPQQPESQEVYEVEYSIDEINKRVNVIKHKGSSVHIEVFEPNGVSNGHEYLDTMHHFPGVASTVVFDGAYGGNDAILHVLLNDGTLARFTPSRVYTNFHSHKNRLVYGQMHSFVVBDYELANRIYLGAPIFQNRKLISVVSCRYDEYDDGIAVFPISAVRSAGLVSGQIEYDSRVIVHNFEPGMSVYGKKQLPYESTVPSMLSLKRFAINAHNNRRAYRDLPRAINVFHNRQNIVLTVTEGEFEMSRVRMDGPLVRPQT	286	Viruses; Baculoviridae; Alphabaculovirus; Perigonia lusca nucleopolyhedrovirus
YP_717557	YP_717557.1		P26 [Clanis bilineata nucleopolyhedrovirus]	Clanis bilineata nucleopolyhedrovirus	MSSTIFKTLAIYILYTMIASSQAHDTNVIPRAHGTHIIHNVIYTVNDVQRAINIQMVDGKEAQVVVIPPHSNTNNDDRLDMLHHFPGVATDIILPSIQANDMVEILLSDHVLWRTGVDANVFTNYHTHKNRIVFGQLRAVVVKDFTLADQIYIGAPVFKEKRLISVITCRFDDYTNQQVIFPLTGLRAAGLVSGQINYDDNVTVQQLKPGLSVYGRRQLPYKSNEALGQANIKRFAISTQNNRLAYRDMPRNVVFFHDQHNITITINENEFEIARFRFDGPLILPQN	287	Viruses; Baculoviridae; Alphabaculovirus
YP_002854661	YP_002854661.1		P26-1 [Euproctis pseudoconspersa nucleopolyhedrovirus]	Euproctis pseudoconspersa nucleopolyhedrovirus	MRSSSTSLAIFLSIVAAMISHGVSEKAIKSVYDVKYTVNRNNRIVDVISVNNKPLSVEIVAANGQSSGQKRLDLAHHFPGVIVDGLVFDTGVGFDARTVLQVLLDNGTLLRVVPDRVYTNFHTHNRRMVYGQLRTFALRNFAAADQIYIGAPIFLDGKLVSVVTCRFDDYDNGVVLFPVSAVRAPGLMSGQIHFDDKVIVEKLRPGMSIYGRVQLPYNAQNDSADSSILNLKRFAVSASDNRLMYRNLPRTIVVFHDRKQISIGLVEGEFEIDRVRLDGPLIVPQSVE	288	Viruses; Baculoviridae; Alphabaculovirus
YP_009111323	YP_009111323.1	DpCPV-22	hypothetical protein [Dendrolimus punctatus cypovirus 22]	Dendrolimus punctatus cypovirus 22	MDATLNLHLLVETIHHLTYLANQSTNQETTRVLEQYKQSVIDDLASKIVNDELIIPEKPTSAEKPMSVDDLAAPPGEDVPDIVLATDENSYVKRTHHHYAGFYSKNILPPICRDRAVDVNGKTYKLYDSMKTLNVQSSGNDTILTIEPIIFTPDELPKGAVVTNYGTNETVSLITSSYDTQHVNGHKGYPVNDGFKNINIHLAAPVEHVQKTKPIAYADKQFDTKAELIEYLKTVKPLPKIKAHLYTDKHNRGSQLIIHYDGVNIANIHLRARVVGNVIADCEYAPDV	288	Viruses; Riboviria; Orthornavirae; Duplornaviricota; Resentoviricetes; Reovirales; Reoviridae; Spinareovirinae; Cypovirus; unclassified Cypovirus
YP_009552165	YP_009552165.1		p26 [Malacosoma neustria nucleopolyhedrovirus]	Malacosoma neustria nucleopolyhedrovirus	MHIIFIASFLCSLFTASTTITNLAAPRIVNVYNVKCSVDHDSKTVTVFAVNNKSVDIVIAPPGKELTRSSSPISTMQHHQHRLNLHLMHHFPGVASTVFFPSLDKDDRVVVLMSNGALMRATLSHVVANFHTHDRRMVYGQLRSIAITDYSVAEKIYVGAPIFKNGHMVSVVTCRHDDFNSGVVQFPVTGARSEGLILGHVSFDNDEDNNVAVHKLDANVTIYGTTQLPYVSVSPVNGKKFALIVDRNRSNYRDLPRKVVVFHNDTDVLISLVEGQFEMQRIHFDGPLVKSFRRQRY	297	Viruses; Baculoviridae; Alphabaculovirus; unclassified Alphabaculovirus
ADV91363	ADV91363.1		p26b [Spodoptera frugiperda multiple nucleopolyhedrovirus]	Spodoptera frugiperda multiple nucleopolyhedrovirus	MYKMISVLEILVVAFTLCVSTSPLSTMATFNVKYTVDHETKRINVNSVLDAPVSIHVIPPNSDTNGDEKLTLLHQFPGVATNVIFPSITKDDDLYVQLNNGVLYKTRATRVYTNFHTHKNRMVYGQLYTIAVDDFEIANKIYIGAPGPPSRSTVSISLISNSCSPGIYRNKQLVSVITCRFDDYEAGLVMYPVTGIRPQGLISGQIQYDDRVGVETLRPSMSVYGRQQLPYKSAHMSVKQFAMTADMNRQLYRDLPRSVMLFHNNKEITITVVEGEFEMYRIRLDGPLVTNQESSNEEK	299	Viruses; Baculoviridae; Alphabaculovirus
YP_249623	YP_249623.1	ChchNPV	P26 [Chrysodeixis chalcites nucleopolyhedrovirus]	Chrysodeixis chalcites nucleopolyhedrovirus	MLLMSRLVGEKTQDKVLYKMIQSQFILSFMLTIASASMASTPTTTRRTKLNVEYSIDENEKIIRVVAVDGKAVRIETIRPHSDSNYIKTGDDQPPLSVLHHFPGVASDIVFPAIDNSNDSLMVLLNDGILFRVQPEHVYTNFHRHANRLIYGQLRTFAVDDLWIADKIWIGAPIFFNDRLVSVITCRYDDYDAGIVLFPVSGIRPKGLVSGQINYDSTVYVSLLRNGMSVYGKRQMAYSSPYMTVKKFALSTTANRLTYRDLPRNIAIFHNKKEISISLVEGEYEIDRIRLDGPLIVPQ	299	Viruses; Baculoviridae; Alphabaculovirus
YP_009666547	YP_009666547.1		p26 [Oxyplax ochracea nucleopolyhedrovirus]	Oxyplax ochracea nucleopolyhedrovirus	MTPNCVIYESLNSINMDLQFNLINIRLIKAFIIKALFLHQTITCVCVFVLFTPFSVSLTNKMQVYNVEIETDYSNNSMLVTKVNGENAFVKIFKPGQEINDEILNRYHQFPGIATSILFPQLHLHRNVQLLTSDHRLHDAELESVCFNFHVCNKRFVFGTLPAVIVDKRFVNLYVGAPIFFNEKIVSIVTTLHEISNDRWLVPVTGIREASLFSGHVKTNNGVRLEKWLPNTSIYGTKQLPYAEIKQYALEQEKTVIADAEKSCVIFYKESEIRITWNQGEHELMHIRMTGPFVESNFS	299	Viruses; Baculoviridae; Alphabaculovirus
YP_874211	YP_874211.1	EoNPV	p26-a [Ectropis obliqua nucleopolyhedrovirus]	Ectropis obliqua nucleopolyhedrovirus	MSKKVLIVVNNENVKMSLLFLTFMMSCIAVRSDPINIQHGTMYSTEYIIDHNARRVDVFKNNNENVSVHVIGAQGCTTGNENFDVLHHYPGVATDVVFTSAVKHTVLHVLLSDGILLRVTPTHTFTNFHSHKQRIIYGQLNTFSIDDFSLANKIYTGAPIFSNGKLVSVITARSDDFDKGLVYYPVTGARVPNLISGQIQYDNNAGPIKVEKFDSTMHIYGKKQLPVRSIDGYDNVLNIRRFYMSAMANRQMYRDWPRSISIFHDSNFVSIGLVEGEFQILQIEFEGPLIAADENKKTKC	300	Viruses; Baculoviridae; Alphabaculovirus
QIQ51344	QIQ51344.1		VP8 [Erinnyis ello cypovirus 2]	Erinnyis ello cypovirus 2	MSAAGHIEITETVKLIQHLTYLMSESTNIHATNAIGKYKQNLIDYVAHSIIEEGLVDDVEASASKNHLPKMANPADVEKAKLNPYHEVKDETRKDDVKENLVLATNETAFLSKTRHHYTGFYSKQILKPLPADGVVMVNDAPYKTGAVKKVVNAQKNGDSTIITVEPCLFTTDNLPVGSVVKDAEGNEYGMITSHYEAFNKRKAYPIQNAFEHPTVMVSVPCEHRVKEKLMAYADQQFDRKGDLVAYIESLGPKPDIGAIIYTDKYNKNPQLVVHANGHQIINMHLRKRIVGSFIAKAPYQPDSQ	305	Viruses; Riboviria; Orthornavirae; Duplornaviricota; Resentoviricetes; Reovirales; Reoviridae; Spinareovirinae; Cypovirus; unclassified Cypovirus
XP_008552911	XP_008552911.1		PREDICTED: uncharacterized protein LOC103575071 [Microplitis demolitor]	Microplitis demolitor	MGPRKSFIITDFILGVICIVAVTGESQQLPTVYNSGQYNNITFEYNHEDKVINTKTVNGKSVDIVILPINKMVPVDFMPSKNLDKLHQFPVIASSITLFGPSHNEPIEILTIKKQQTAAASDGDEMTTYKTRVYSNASSDRIMYHGYNRRLVWSQLMGVVLKKEVADTIYKGAPVFSSNTKKIISFITAREEYTTEDGEELVLFPLTAIKPKGYSSGQSLHESTEDILQYDTQGKFSVYGRRMMPYTELKAYIETVVTPENIQNSRTKKHESVVFYGKNDVTLTCVQGDVEIARTRIACNLIKPAVQ	307	Eukaryota; Metazoa; Ecdysozoa; Arthropoda; Hexapoda; Insecta; Pterygota; Neoptera; Holometabola; Hymenoptera; Apocrita; Terebrantes; Ichneumonoidea; Braconidae; Microgastrinae; Microplitis
YP_009049954	YP_009049954.1		p26 [Peridroma alphabaculovirus]	Peridroma alphabaculovirus	MLRCFLSNRVCAPTRDERGIIYYIKMSRVDVARARLQIRAMYKMAYLATVLALVAAMAVSANTLSKHNVTYTVDEVRRTMRVNTVDGVPVTIEPIPPHSDTDGRDELSVLHQFPGVATQVVFPPLAPTDTLFVQLNNKALYRTRAAAVYTNFHTHKGRMVYGQLLTIVVDDLAVAGKIYVGAPIFRDRKLVSVVTCRMDDYDKGVALFPVTGIRPRGLVSGQFNFDDRVIVQELRPGMSVYGRQQLPYDSAHMSVKHFALATVANKQAYRDMPRAIAVFHNQREVTVALVEGEFEVDRVRFDGPLIVPQE	310	Viruses; Baculoviridae; Alphabaculovirus; unclassified Alphabaculovirus
QED40546	QED40546.1		P26A [Chrysodeixis includens nucleopolyhedrovirus]	Chrysodeixis includens nucleopolyhedrovirus	MKLYIGFVALSYVVLQASAFVSPPQRVVNYPNRHKDEALELLTSKKLIMDSSNEIYSANLSNITKYNVHCSVDDTNKQMQVLQVDGKPVHIEVIPPNGETNGRDGLSLLHQFPGVASEVLFPPINDKDAHLYVLLNNGVLALVKPTKVYTNFHKHQGRFIYGQLRTFVIDDFSLADQIYIGAPIFMNKTLVSVVTCRYDDYDAGTVMFPVSGVRPNGLVSGQFHYDNNVLVSTLKPNMSVYGKHQMLYQSQFMSVKRFALTASANRLAYRDLPRSVAVFHNKKEIIITLTEGEFEIDRVRFDGPIVTPQHR	311	Viruses; Baculoviridae; Alphabaculovirus
QHB21712	QHB21712.1		P26-1 [Euproctis digramma nucleopolyhedrovirus]	Euproctis digramma nucleopolyhedrovirus	MMSIDLYWALSLVAMITSSVNALPASTGVDTRTVYGVRYKIDYDRRIIDVLSVNNKSCSVEVIAPNGRSSGRGGDLDLAHHFPGAIVTDIVFDVSAVNSHTVLHVLLDNGSLLRVVPDRVYTNFHTHNWRMVYGQLRTFAVDDFTLANRIYIGAPIFLNGKLVSVVTCRYDEYDLSLAMFPVSGIRSPGLVSGQIHFDDEVIVKNLRVGMSVYGKMQLPYNNAQVDNDDNKITNDANFDDDDDDDQNGGLALNAKRFAISATNNRRMYRNLPRTVAVFHDRDQVSIGLVEGEFEINRVRFDGPLIVPQGIDIR	313	Viruses; Baculoviridae; Alphabaculovirus; unclassified Alphabaculovirus
RVE41251	RVE41251.1	striped riceborer	hypothetical protein evm_014096 [Chilo suppressalis]	Chilo suppressalis	MPSLRFGVELKWNHHHQLISVPTAGAQAFPMDGIGRLGHNLPRGPSADWWVLTTANAAGTNGLTRLPKHGGTQDRRFLLTHLLTDHCEKIARAGFRGVARPWGNEGDDPKSGPDLHTICTSPLWFGDSVVGVSQLSSHTHHYCGVFTEELLAPLEELAYVRLDENLAEKVFINRTKRILLISSDGVLAQWRCAPTFESANKFIAGTPLVNARGQLVSVITARRGNHYAVSTLEGEGGYFETSQPWEVIPDCGPGLVYGDRVFPTREELQDHVTSLPPATVAGGEPTTPVLIAAPHPRLALITTNKRQLSHHFLPPSVLTTDIEYL	325	Eukaryota; Metazoa; Ecdysozoa; Arthropoda; Hexapoda; Insecta; Pterygota; Neoptera; Holometabola; Lepidoptera; Glossata; Ditrysia; Pyraloidea; Crambidae; Crambinae; Chilo
KAF4524375	KAF4524375.1		hypothetical protein B566_EDAN007551 [Ephemera danica]	Ephemera danica	MYLEAAITNKKMKEPEFSDYQLDMMKLPTSEEHTNTSTQTAFYTSITNSENNDEKYIAGRYIHNDSFLTADHCQKFGLDWLSTYDCLEGLNSFHVAQWSSIMLLEGVNIHAKGWSGAPIIARDQIMAFEGLDLDGNICTRKNYNEIKEFCSNIEDQIIHSFKDEPRIKLTGYDCDIIQNSRGVYTDPNQIITRVVHRDGAAPSFHGFPDLCTNKVLPTVEKDDNIEKLIYGVVPAFYSKEILQCGSPIFKDKKLVSVITQCYDDHYYTVSGISDFSGHIRTESYERKIVEAGEAVYGVTSAPYAVIKALAIEKSHLEPAGSSSVTLFAFKTQVRTDVTVTTENGVELLHLRYKASMINKPCI	362	Eukaryota; Metazoa; Ecdysozoa; Arthropoda; Hexapoda; Insecta; Pterygota; Palaeoptera; Ephemeroptera; Scapphodonta; Ephemeridae; Ephemera
GBP20819	GBP20819.1		hypothetical protein EVAR_14545_1 [Eumeta japonica]	Eumeta japonica	MPKKDYMKCYFGCRTKGPFHRFPKPDYPHSDRFDSWKAVLSPAIQNKGDSYICDNVRICDFHFEDRYRLPSKRLTRTGVPTLNIPIRSCVERTGYLLKPSTNQSNFGHFHKTGDAGPSGCVPSINLDDSQREQHLENTADGTAAAREVMSPPTALNPPPYEGVVERRAVPVELHNTTDGRPVARLGTCLPIHSTSAEEAARLALITHHYAGLFTENILSPLGELAYVRLDADTVEKVFVNRSRRILITSSDGRLAQWRAVPTFESRNRYVAGTPVVDGGGALVSVVLARRHNHYALAANDGEGGYFDTTEPWRVMDPPAGALVYADRWFTTREELRAYVSSLGPVDAGAPTPVLHRGARTRVSLVAPGGRQIAHVHLHTALTDDVEYL	388	Eukaryota; Metazoa; Ecdysozoa; Arthropoda; Hexapoda; Insecta; Pterygota; Neoptera; Holometabola; Lepidoptera; Glossata; Ditrysia; Tineoidea; Psychidae; Oiketicinae; Eumeta
YP_009133287	YP_009133287.1		p26b [Lambdina fiscellaria nucleopolyhedrovirus]	Lambdina fiscellaria nucleopolyhedrovirus	MTSATMYFDEFASGASMNINDDDNALNTKNDKTPSSASIDINVKTPFQACSDNCFYCDLCYCKEGQHSQKPLSSQLKVFENEQKLLQKQPSLSLLSSSSVTKYSQNDANVYSVAENNVEELCVVGDSRSAPHGIEDNLQRRDDGVRVFEIKNVRFAVNFTLKQVFAHAYKGNSINVHVVSHRDVCVAPSAVHVYPGVLSQFKLPELKAASCVQVVRFNANNEMYVSVERLDTKLYYVHHHRNNDYVYGLVPAIRCVSFENARTAFLGAPIFDSRNNLVSFVTNHYMDVYHDGGCVLPVVGKSSRLFSSMRITGAVQVRYEDNNRLELPTSALSGAHTTATKNEIKIAQKQLQKQQQQLVDLNVSVRRKRINLFLIHNGRVLMHTNIKSLFAGSMLYC	397	Viruses; Baculoviridae; Alphabaculovirus
AER57985	AER57985.1		schlafen-like protein [Camelpox virus]	Camelpox virus	MAMFYAHALGGYDENIHAFPGISSTVANDVRKYSVVSVYNNKYDIIKDKYMWCYSQVNKRYIGALLPMFECNEYLQIGDPIHDQEGNQISIVTYRHKNYYALSGIGYESLDLCLEGVGIHHHVLETGNAVYGKVQHDYSTIKEKAKEMSTLSPGPIIDYHVWIGNCICQVTAVDVHGKEIMRMRFKKGAVLQIPNLVKVKLGENDSENLSTTISALLNSGGGTIEVTSQEDRVNHVLIKRLESIRHMWSVYDRFNIVNGKECCYIHLHSSNQNLMPSTVKTNLYMRSMTSCIQMDPITALYYLSELKESGGQSPRPELPEFDYPDGVQDDGSIERVAEEFFNRSELQAGESVEFGNSVNVKNTSVSAKQLRTRIRQQLPSILSSFANTEGGYLFIGLDN…	502	Viruses; Varidnaviria; Bamfordvirae; Nucleocytoviricota; Pokkesviricetes; Chitovirales; Poxviridae; Chordopoxvirinae; Orthopoxvirus
AKA20382	AKA20382.1		Schlafen-like virulence protein [Camelpox virus]	Camelpox virus	MAMFYAHALGGYDENIHAFPGISSTVANDVRKYSVVSVYNNKYDIIKDKYMWCYSQVNKRYIGALLPMFECNEYLQIGDPIHDQEGNQISIVTYRHKNYYALSGIGYESLDLCLEGVGIHHHVLETGNAVYGKVQHDYSTIKEKAKEMSTLSPGPIIDYHVWIGDCICQVTAVDVHGKEIMRMRFKKGAVLQIPNLVKVKLGENDSENLSTTISALLNSGGGTIEVTSQEDRVNHVLIKRLESIRHMWSVYDRFNIVNGKECCYIHLHSSNQNLMPSTVKTDLYMRSMTSCIQMDPITALYYLSELKESGGQSPRPELPEFDYPDGVQDDGSIERVAEESFNRSELQAGESVEFGNSVNVKNTSVSAKQLRTRIRQQLPSILSSFANTEGGYLFIGLDN…	502	Viruses; Varidnaviria; Bamfordvirae; Nucleocytoviricota; Pokkesviricetes; Chitovirales; Poxviridae; Chordopoxvirinae; Orthopoxvirus
AKA20383	AKA20383.1		Schlafen-like virulence protein [Camelpox virus]	Camelpox virus	MAMFYAHALGGYDENIHAFPGISSTVANDVRKYPVVSVYNNKYDIIKDKYMWCYSQVNKRYIGALLPMFECNEYLQIGDPIHDQEGNQISIVTYRHKNYYALSGIGYESLDLCLEGVGIHHHVLETGNAVYGKVQHDYSTIKEKAKEMSTLSPGPIIDYHVWIGDCICQVTAVDVHGKEIMRMRFKKGAVLQIPNLVKVKLGENDSENLSTTISALLNSGGGTIEVTSQEDRVNHVLIKRLESIRHMWSVYDRFNIVNGKECCYIHLHSSNQNLMPSTVKTNLYMRSMTSCIQMDPITALYYLSELKESGGQSPRPELPEFDYPDGVQDDGSIERVAEEFFNRSELQAGESVEFGNSVNVKNTSVSAKQLRTRIRQQLPSILSSFANTEGGYLFIGLDN…	502	Viruses; Varidnaviria; Bamfordvirae; Nucleocytoviricota; Pokkesviricetes; Chitovirales; Poxviridae; Chordopoxvirinae; Orthopoxvirus
AKA20384	AKA20384.1		Schlafen-like virulence protein [Camelpox virus]	Camelpox virus	MAMFYAHALGGYDENIHAFPGISSTVANDVRKYPVVSVYNNKYDIIKDKYMWCYSQVNKRYIGALLPMFECNEYLQIGDPIHDQEGNQISIVTYRHKNYYALSGIGYESLDLCLEGVGIHHHVLETGNAVYGKVQHDYSTIKEKAKEMSTLSPGPIIDYHVWIGDCICQVTAVDVHGKEIMRMRFKKGAVLQIPNLVKVKLGENDSENLSTTISALLNSGGGTIEVTSQEDRVNHVLMKRLESIRHMWSVYDRFNIVNGKECCYIHLHSSNQNLMPSTVKTNLYMRSMTSCIQMDPITALYYLSELKESGGQSPRPELPEFDYPDGVQDDGSIERVAEEFFNRSELQAGESVEFGNSVNVKNTSVSAKQLRTRIRQQLPSILSSFANTEGGYLFIGLDN…	502	Viruses; Varidnaviria; Bamfordvirae; Nucleocytoviricota; Pokkesviricetes; Chitovirales; Poxviridae; Chordopoxvirinae; Orthopoxvirus
AKA20385	AKA20385.1		Schlafen-like virulence protein [Camelpox virus]	Camelpox virus	MAMFYAHALGGYDENIHAFPGISSTVANDVRKYSVVSVYNNKYDIIKDKYMWCYSQVNKRYIGALLPMFECNEYLQIGDPIHDQEGNQISIVTYRHKNYYALSGIGYESLDLCLEGVGIHHHVLETGNAVYGKVQHDYSTIKEKAKEMSTLSPGPIIDYHVWIGDCICQVTAVDVHGKEIMRMRFKKGAVLQIPNLVKVKLGENDSENLSTTISALLNSGGGTIEVTSQEDRVNHVLIKRLESIRHMWSVYDRFNIVNGKECCYIHLHSSNQNLMPSTVKTNLYMRSMTSCIQMDPITALYYLSELKESGGQSPRPELPEFDYPDGVQDDGSIERVAEEFFNRSELQAGESVEFGNSVNVKNTSVSAKQLRTRIRQQLPSILSSFANTEGGYLFIGLDN…	502	Viruses; Varidnaviria; Bamfordvirae; Nucleocytoviricota; Pokkesviricetes; Chitovirales; Poxviridae; Chordopoxvirinae; Orthopoxvirus
NP_570569	NP_570569.1		CMLV179 [Camelpox virus]	Camelpox virus	MAMFYAHALGGYDENIHAFPGISSTVANDVRKYSVVSVYNNKYDIIKDKYMWCYSQVNKRYIGALLPMFECNEYLQIGDPIHDQEGNQISIVTYRHKNYYALSGIGYESLDLCLEGVGIHHHVLETGNAVYGKVQHDYSTIKEKAKEMSTLSPGPIIDYHVWIGDCICQVTAVDVHGKEIMRMRFKKGAVLQIPNLVKVKLGENDSENLSTTISALLNSGGGTIEVTSQEDRVNHVLMKRLESIRHMWSVYDRFNIVNGKECCYIHLHSSNQNLMPSTVKTNLYMRSMTSCIQMDPITALYYLSELKESGGQSPRPELPEFDYPDGVQDDGSIERVAEEFFNRSELQAGESVEFGNSVNVKNTSVSAKQLRTRIRQQLPSILSSFANTEGGYLFIGLDN…	502	Viruses; Varidnaviria; Bamfordvirae; Nucleocytoviricota; Pokkesviricetes; Chitovirales; Poxviridae; Chordopoxvirinae; Orthopoxvirus
YP_717493	YP_717493.1		hypothetical protein TATV_DAH68_186 [Taterapox virus]	Taterapox virus	MAMFYAHALGGYDENLHAFPGISSTVANDVRKYSVVSVYNNKYDIVKDKYMWCYSQVNKRYIGALMPMFECNEYLQIGDPIHDQEGNQISIVTYRHKNYYALSGIGYESLDLCLEGVGIHHHVLETGNAVYGKVQHDYSTIKEKAKEMSALSPGPIIDYHVWIGDCICQVTAVDVHGKEIMRMRFKKGAVLQIPNLVKVKLGENDTENLSTTISALLNSGGGTIEVTSQEDRVNHVLMKRLESIRHMWSVYDRFNIVNGKECCYIHLHSSNQNLMPSTVKTNLYMRSMTSCIQMDPITALDYLSELKESGGQSPRPELPEFDYPDGVQDDGSIERFAEEFFNRSELQAGESVEFGNSVNVKNTSVSAKQLRTRIRQQLPSILSSFANTEGGYLFIGLDN…	502	Viruses; Varidnaviria; Bamfordvirae; Nucleocytoviricota; Pokkesviricetes; Chitovirales; Poxviridae; Chordopoxvirinae; Orthopoxvirus
AAY97169	AAY97169.1		unknown [Monkeypox virus]	Monkeypox virus	MFYAHAFGGYDENLHAFPGISSTVANDVRKYSVVSVYNKKYNIVKNKYMWCNSQVNKRYIGALLPMFECNEYLQIGDPIHDLEGNQISIVTYRHKNYYALSGIGYESLDLCLEGVGIHHHVLETGNAVYGKVQHEYSTIKEKAKEMNALKPGPIIDYHVWIGDCVCQVTTVDVHGKEIMRMRFKRGAVLPIPNLVKVKVGEENDTINLSTSISALLNSGGGTIEVTSKEERVDYVLMKRLESIHHLWSVVYDHLNVVNGEERCYIHMHSSHQSPMLSTVKTNLYMKTMGACLQMDSMEALEYLSELKESGGRSPRPELQKFEYPDGVKDTESIERLAEEFFNRSELQAGESVKFGNSINVKHTSVSAKQLRTRIRQQLPSILSSFANTKGGYLFIGVDN…	503	Viruses; Varidnaviria; Bamfordvirae; Nucleocytoviricota; Pokkesviricetes; Chitovirales; Poxviridae; Chordopoxvirinae; Orthopoxvirus
ADK39194	ADK39194.1		unknown protein [Monkeypox virus]	Monkeypox virus	MFYAHAFGGYDENLHAFPGISSTVANDVRKYSVVSVYNKKYNIVKNKYMWCNSQVNKRYIGALLPMFECNEYLQIGDPIHDLEGNQISIVTYRHKNYYALSGIGYESLDLCLEGVGIHHHVLETGNAVYGKVQHEYSTIKEKAKEMNALKPGPIIDYHVWIGDCVCQVTTVDVHGKEIMRMRFKRGAVLPIPNLVKVKVGEENDTINLSTSISALLNSGGGTIEVTSKEERVDYVLMKRLESIHHLWSVVYDHLNVVNGEERCYIHMYSSHQSPMLSTVKTNLYMKTMGACLQMDSMEALEYLSELKESGGRSPRPELQKFEYPDGVKDTESIERLAEEFFNRSELQAGESVKFGNSINVKHTSVSAKQLRTRIRQQLPSILSSFANTKGGYLFIGVDN…	503	Viruses; Varidnaviria; Bamfordvirae; Nucleocytoviricota; Pokkesviricetes; Chitovirales; Poxviridae; Chordopoxvirinae; Orthopoxvirus
ADX22817	ADX22817.1		unknown [Monkeypox virus]	Monkeypox virus	MFYAHAFGGYDENLHAFPGISSTVANDVRKYSVVSVYNKKYNIVKNKYMWCNSQVNKRYIGALLPMFECNEYLQIGDPIHDLEGNQISIVTYRHKNYYALSGIGYESLDLCLXGVGIHHHVLETGNAVYGKVQHEYSTIKEKAKEMNALKPGPIIDYHVWIGDCVCQVTTVDVHGKEIMRMRFKRGAVLPIPNLVKVKVGEENDTINLSTSISALLNSGGGTIEVTSKEERVDYVLMKRLESIHHLWSVVYDHLNVVNGEERCYIHMHSSHQSPMLSTVKTNLYMKTMGACLXMDSMEALEYLSELKESGGRSPRPELQKFEYPDGVKDTESIERLAEEFFNRSELQAGESVKFGNSINVKHTSVSAKQLRTRIRQQLPSILSSFANTKGGYLFIGVDN…	503	Viruses; Varidnaviria; Bamfordvirae; Nucleocytoviricota; Pokkesviricetes; Chitovirales; Poxviridae; Chordopoxvirinae; Orthopoxvirus
ADX23013	ADX23013.1		unknown [Monkeypox virus]	Monkeypox virus	MFYAHAFGGYDENLHAFPGISSTVANDVRKYSVVSVYNKKYNIVKNKYMWCNSQVNKRYIGALLPMFECNEYLQIGDPIHDLEGNQISIVTYRHKNYYALSGIGYESLDLCLEGVGIHHHVLETGNAVYGKVQHEYSTIKEKAKEMNALKPGPIIDYHVWIGDCVCQVTTVDVHGKEIMRMRFKRGAVLPIPNLVKVKVGEENDTINLSTSISALLNSGGGTIEVTSKEERVDYVLMKRLESIHHLWSVVYDHLNVVNGEERCYIHMHSSHQSPMLSTVKTNLYMKTMGACLXMDSMEALEYLSELKESGGRSPRPELQKFEYPDGVKDTESIERLAEEFFNRSELQAGESVKFGNSINVKHTSVSAKQLRTRIRQQLPSILSSFANTKGGYLFIGVDN…	503	Viruses; Varidnaviria; Bamfordvirae; Nucleocytoviricota; Pokkesviricetes; Chitovirales; Poxviridae; Chordopoxvirinae; Orthopoxvirus
ADZ24189	ADZ24189.1		hypothetical protein CPXV_AUS1999_867_185 [Cowpox virus]	Cowpox virus	MAMFYAHALGGYDENLHAFPGISSTVANDVRKYSVVSVYNNKYDIVKDKYMWCYSQVNKRYIGALLPMFECNEYLQIGDPIHDQEGNQISIITYRHKNYYALSGIGYESLDLCLEGVGIHHHVLETGNAVYGKVQHDYSTIKEKAKEMSALSPGPIIDYHVWIGDCICQVTAVDVHGKEIMKMRFKKGAVLQIPNLVKVKLGENDTENLSTAISALLNSGGGTIEVTSQEDRVNHVLMKRLESIRHMWSVVYDHFDIVNGKECCYVHMHSSNQNPIPSTVKTNLYMKTMGSCIQMDSMEALEYLSELKESGGRSPRPEMQEFEYPDGVEDTESIERLAEEFFNRSELQAGESVKFGNSINVKHTSVSAKQLRTRIRQQLPSILSSFANTKGGYLFIGVD…	503	Viruses; Varidnaviria; Bamfordvirae; Nucleocytoviricota; Pokkesviricetes; Chitovirales; Poxviridae; Chordopoxvirinae; Orthopoxvirus
ADZ29302	ADZ29302.1		hypothetical protein CPXV_FIN2000_MAN_185 [Cowpox virus]	Cowpox virus	MAMFYAHALGGYDENLHAFPGISSTVANDVRKYSVVSVYNNKYDIVKDKYMWCYSQVNKRYIGALLPMFECNEYLQIGDPIHDQEGNQISIITYRHKNYYALSGIGYESLDLCLEGVGIHHHVLETGNAVYGKVQHDYSTIKEKAKEMSTLSPGPIIDYHVWIGDCICQVTAVDVHGKEIMKMRFKKGAVLQIPNLVKVKLGENDTENLSTAISALLNSGGGTIEVTSQEDRVNHVLMKRLESIRHMWSVVYDHFDIVNGKECCYVHMHSSNQNPIPSTVKTNLYMKTMGSCIQMDSMESLEYLSELKESGGRSPRPEMQEFEYPDGVEDTESIERLAEEFFNRSELQTGESVKFGNSINVKHTSVSAKQLRTRIRQQLPSILSSFANTEGGYLFIGVD…	503	Viruses; Varidnaviria; Bamfordvirae; Nucleocytoviricota; Pokkesviricetes; Chitovirales; Poxviridae; Chordopoxvirinae; Orthopoxvirus
AGR34907	AGR34907.1		hypothetical protein MPXVgp165 [Monkeypox virus]	Monkeypox virus	MFYAHAFGGYDENLHAFPGISSTVANDVRKYSVVSVYNKKYNIVKNKYMWCNSQVNKRYIGALLPMFECNEYLQIGDPIHDLEGNQISIVTYRHKNYYALSGIGYESLDLCLEGVGIHHHVLETGNAVYGKVQHEYSTIKEKAKEMNAFKPGPIIDYHVWIGDCVCQVTTVDVHGKEIMRMRFKRGAVLPIPNLVKVKVGEENDTINLSTSISALLNSGGGTIEVTSKEERVDYVLMKRLESIHHLWSVVYDHLNVVNGEERCYIHMHSSHQSPMLSTVKTNLYMKTMGACLQMDSMEALEYLSELKESGGRSPRPELQKFEYPDGVKDTESIERLAEEFFNRSELQAGESVKFGNSINVKHTSVSAKQLRTRIRQQLPSILSSFANTKGGYLFIGVDN…	503	Viruses; Varidnaviria; Bamfordvirae; Nucleocytoviricota; Pokkesviricetes; Chitovirales; Poxviridae; Chordopoxvirinae; Orthopoxvirus
AKG51327	AKG51327.1		Schlafen-like protein [Monkeypox virus]	Monkeypox virus	MFYAHAFGGYDENLHAFPGISSTVANDVRKYSVVSVYNKKYNIVKNKYMWCNSQVNKRYIGALLPMFECNEYLQIGDPIHDLEGNQISIVTYRHKNYYALSGIGYESLDLCLEGVGIHHHVLETGNAVYGKVQHEYSTIKEKAKEMNALKPGPIIDYHVWIGDCVCQVTTVDVHGKEIMRMRFKRGAVLPIPNLVKVKVGEENDTINLSTSISALLNSGGGTIEVTSKEERVDYVLMKRLESIHHLWSVVYDHLNVVNGEERCYVHMHSSHQSPMLSTVKTNLYMKTMGACLQMDSMEALEYLSELKESGGRSPRPELQKFEYPDGVKDTESIERLAEEFFNRSELQAGESVKFGNSINVKHTSVSAKQLRTRIRQQLPSILSSFANTKGGYLFIGVDN…	503	Viruses; Varidnaviria; Bamfordvirae; Nucleocytoviricota; Pokkesviricetes; Chitovirales; Poxviridae; Chordopoxvirinae; Orthopoxvirus
CAD90728	CAD90728.1		B2R protein [Cowpox virus]	Cowpox virus	MAMFYAHALGGYDENLHAFPGISSTVANDVRKYSVVSVYNNKYDIVKDKYMWCYSEVNKRYIGALLPMFECNEYLQIGDPIHDQEGNQISIITYRHKNYYALSGIGYESLDLCLEGVGIHHHVLETGNAVYGKVQHDYSTIKEKAKEMSTLSPGPIIDYHVWIGDCICQVTAVDVHGKEIMKMRFKKGAVLQIPNLVKVKLGENDTENLSTAISALLNSGGGTIEVTSQEDRVNHVLMKRLESIRHMWSVVYDHFDIVNGKECCYVHMHSSNQNPIPSTVKTNLYMKTMGSCIQMDSMEALEYLSELKESGGRSPRPEMQEFEYPDGVEDTESIERLAEEFFNRSELQAGESVKFGNSINVKHTSVSAKQLRTRIRQQLPSILSSFANTEGGYLFIGVD…	503	Viruses; Varidnaviria; Bamfordvirae; Nucleocytoviricota; Pokkesviricetes; Chitovirales; Poxviridae; Chordopoxvirinae; Orthopoxvirus
NP_536592	NP_536592.1		B4R [Monkeypox virus Zaire-96-I-16]	Monkeypox virus Zaire-96-I-16	MFYAHAFGGYDENLHAFPRISSTVANDVRKYSVVSVYNKKYNIVKNKYMWCNSQVNKRYIGALLPMFECNEYLQIGDPIHDLEGNQISIVTYRHKNYYALSGIGYESLDLCLEGVGIHHHVLETGNAVYGKVQHEYSTIKEKAKEMNALKPGPIIDYHVWIGDCVCQVTTVDVHGKEIMRMRFKRGAVLPIPNLVKVKVGEENDTINLSTSISALLNSGGGTIEVTSKEERVDYVLMKRLESIHHLWSVVYDHLNVVNGEERCYIHMHSSHQSPMLSTVKTNLYMKTMGACLQMDSMEALEYLSELKESGGRSPRPELQKFEYPDGVKDTESIERLAEEFFNRSELQAGESVKFGNSINVKHTSVSAKQLRTRIRQQLPSILSSFANTKGGYLFIGVDN…	503	Viruses; Varidnaviria; Bamfordvirae; Nucleocytoviricota; Pokkesviricetes; Chitovirales; Poxviridae; Chordopoxvirinae; Orthopoxvirus
NP_671672	NP_671672.1		EVM153 [Ectromelia virus]	Ectromelia virus	MAMFYTHAFGGYDENLHAFPGISSTVANDVRKYSVVSVYNKKYKIVKNKYMWCYSQVNKRYIGALLPMFECNEYLQIGDPIHDQEGNQISIITYRHKNYYALSGIGYESLDLCLEGVGIHHHVLETGNAVYGKVQHDYSTIKEKAKEMSALSPGPIIDYHVWIGDCICQVTAVDVHGKEIMRMRFKKGAVLQIPNLVKVKLGENDTENLSTAISALLNSGGGTIEVTSKEERVDYVLMKRLESIHHLWSVVYDHLNVVNGKERCYVHMHSSNQHPIPSTVKTNLYMKTMGSCLQMDSMEALEYLSELKESGGRSPRPELQKFEYPDGVEDTESIERLAEEFFNRSELQAGESVKFGNSINVKHTSVSAKQLRTRIRQQLPSILSSFANTEGGYLFIGVD…	503	Viruses; Varidnaviria; Bamfordvirae; Nucleocytoviricota; Pokkesviricetes; Chitovirales; Poxviridae; Chordopoxvirinae; Orthopoxvirus
ABD97531	ABD97531.1		unknown [Cowpox virus]	Cowpox virus	MAMFYAHAFGGYDENLHAFPGISSTVANDVRKYSVVSVYNNKYDIVKDKYMWCYSQVNKRYIGALLPMFECNEYLQIGDPIHDQEGNQISIVTYRHKNYYALSGIGYESLDLCLEGVGIHHHVLETGNAVYGKVQHDYSTIKEKAKEMNSLSPGPIIDYHVWIGDCVCQVTAVDVHGKEIMRMRFKKGAVLPIPNLVKVKVGEKNDTVNLSTSISALLNSGGGTIEVTSKEERVDYVLMKRLESIRHLWSVVYDHFDVVNGKERCYVHMHSSNQSPMLSTVKTNLYMKTMGACLQMDSMEALEYLSELKESGGRSPRPELQKFEYPDGVEDAGSIERLAEEFFSRSELQAGESVKFGNSINVKNTSVSSKQLRTRIRQQLPSILSSFANTDGGYLFIGV…	504	Viruses; Varidnaviria; Bamfordvirae; Nucleocytoviricota; Pokkesviricetes; Chitovirales; Poxviridae; Chordopoxvirinae; Orthopoxvirus
AGY97061	AGY97061.1		CPXV197 protein [Cowpox virus]	Cowpox virus	MAMFYAHALGGYDENLHAFPGISSTVANDVRKYSVVSVYNNKYDIVKDKYMWCYSQVNKRYIGALLPMFECNEYLQIGDPIHDQEGNQISIVTYRHKNYYALSGIGYESLDLCLEGVGIHHHVLETGNAVYGKVQHDYSTIKEKAKEMNSLSPGPIIDYHVWIGDCICQVTAVDVHGKEIMRMRFKRGAVLPIPNLVKVKVGEENDTVNLSSAISALLNSGGGTIEVTSKEERVDYVLMKRLESIRHLWSVVYDHFDVVNGEERCYVHMHSSNQSPMLSTVKTNLYMKTMGACLQMDSMEALEYLSELKESGGRSPRPELQKFEYPDGVEDAGSIERLAEEFFSRSELQAGESVKFGNSINVKSTSVSAKQLRTRIRQQLPSILSSFANTDGGYLFIGV…	504	Viruses; Varidnaviria; Bamfordvirae; Nucleocytoviricota; Pokkesviricetes; Chitovirales; Poxviridae; Chordopoxvirinae; Orthopoxvirus
AGY97274	AGY97274.1		CPXV197 protein [Cowpox virus]	Cowpox virus	MAMFYAHALGGYDENLHAFPGISSTVANDVRKYSVVSVYNNKYDIVKDKYMWCYSQVNKRYIGALLPMFECNEYLQIGDPIHDQEGNQISIVTYRHKNYYALSGIGYESLDLCLEGVGIHHHVLETGNAVYGKVQHDYSTIKEKAKEMNSLSPGPIIDYHVWIGDCICQVTAVDVHGKEIMRMRFKRGAVLPIPNLVKVKVGEENDTVNLSSAISALLNSGGGTIEVTSKEERVDYVLMKRLESIRHLWSVVYDHFNVVNGEERCYVHMHSSNQSPMLSTVKTNLYMKTMGACLQMDSMEALEYLSELKESGGRSPRPELQKFEYPDGVEDAGSIERLAEEFFSRSELQAGESVKFGNSINVKSTSVSAKQLRTRIRQQLPSILSSFANTDGGYLFIGV…	504	Viruses; Varidnaviria; Bamfordvirae; Nucleocytoviricota; Pokkesviricetes; Chitovirales; Poxviridae; Chordopoxvirinae; Orthopoxvirus
AGY97490	AGY97490.1		CPXV197 protein [Cowpox virus]	Cowpox virus	MAMFYAHALGGYDENLHAFPGISSTVANDVRKYSVVSVYNNKYDIVKDKYMWCYSQVNKRYIGALLPMFECNEYLQIGDPIHDQEGNQISIVTYRHKNYYALSGIGYESLDLCLEGVGIHHHVLETGNAVYGKVQHDYSTIKEKAKEMNSLSPGPIIDYHVWIGDCICQVTAVDVHGKEIMRMRFKRGAVLPIPNLVKVKVGEENDTVNLSSAISALLNSGGGTIEVTSKEERVDYVLMKRLESIRHLWSVVYDHFNVVNGEERCYVHMHSSNQSPMLSTVKTNLYMKTMGACLQMDSMEALEYLSELKESGGRSPRPELQKFEYPDGVEDAGSIERLAEEFFSRSELQAGESVKFGNSINVKSTSVSAKQLRTRIRQQLPSILSSFANTDGGYLFIGV…	504	Viruses; Varidnaviria; Bamfordvirae; Nucleocytoviricota; Pokkesviricetes; Chitovirales; Poxviridae; Chordopoxvirinae; Orthopoxvirus
AGY97927	AGY97927.1		CPXV197 protein [Cowpox virus]	Cowpox virus	MAMFYAHALGGYDENLHAFPGISSTVANDVRKYSVVSVYNNKYDIVKDKYMWCYSQVNKRYIGALLPMFECNEYLQIGDPIHDQEGNQISIVTYRHKNYYALSGIGYESLDLCLEGVGIHHHVLETGNAVYGKVQHDYSTIKEKAKEMNSLSPGPIIDYHVWIGDCICQVTAVDVHGKEIMRMRFKRGAVLQIPNLVKVKVGEENDTVNLSSAISALLNSGGGTIEVTSKEERVDYVLMKRLESIRHLWSVVYDHFDVVNGEERCYVHMHSSNQSPMLSTVKTNLYMKTMGACLQMDSMEALEYLSELKESGGRSPRPELQKFEYPDGVEDAGSIERLAEEFFSRSELQAGESVKFGNSINVKSTSVSAKQLRTRIRQQLPSILSSFANTDGGYLFIGV…	504	Viruses; Varidnaviria; Bamfordvirae; Nucleocytoviricota; Pokkesviricetes; Chitovirales; Poxviridae; Chordopoxvirinae; Orthopoxvirus
AGY98136	AGY98136.1		CPXV197 protein [Cowpox virus]	Cowpox virus	MAMFYAHALGGYDENLHAFPGISSTVANDVRKYSVVSVYNNKYDIVKDKYMWCYSQVNKRYIGALLPMFECNEYLQIGDPIHDQEGNQISIVTYRHKNYYALSGIGYESLDLCLEGVGIHHHVLETGNAVYGKVQHDYSTIKEKAKEMNSLSPGPIIDYHVWIGDCICQVTAVDVHGKEIMRMRFKRGAVLPIPNLVKVKVGEENDTVNLSTSISALLNSGGGTIEVTSKEERVDYVLMKRLESIRHLWSVVYDHFDVVNGEERCYVHMHSSNQSPMLSTVKTNLYMKTMGACLQMDSMEALEYLSELKESGGRSPRPELQKFEYPDGVEDAGSIERLAEEFFSRSELQAGESVKFGNSINVKSTSVSAKQLRTRIRQQLPSILSSFANTDGGYLFIGV…	504	Viruses; Varidnaviria; Bamfordvirae; Nucleocytoviricota; Pokkesviricetes; Chitovirales; Poxviridae; Chordopoxvirinae; Orthopoxvirus
AGY98783	AGY98783.1		CPXV197 protein [Cowpox virus]	Cowpox virus	MAMFYAHAFGGYDENLHAFPGISSTVANDVRKYSVVSVYNNKYDIVKDKYMWCYSQVNKRYIGALLPMFECNEYLQIGDPIHDQEGNQISIVTYRHKNYYALSGIGYESLDLCLEGVGIHHHVIETGNAVYGKVQHDYSTIKEKAKEMNSLSPGPIIDYHVWIGDCVCQVTAVDVHGKEIMRMRFKKGAVLPIPNLVKVKVGEENDTVNLSTSISALLNSGGGTIEVTSKEERVDYVLMKRLESIRHLWSVVHDHFDVVNGKERCYVHMHSSNQSPMLSTVKTNLYMKTMGACLQMDSMEALEYLSELKESGGRSPRPELPEFEYPDGVEDAGSIERLAEEFFSRSELQAGESVKFGNSINVKHTSVSSKQLRTRIRQQLPSILSSFANTDGGYLFIGV…	504	Viruses; Varidnaviria; Bamfordvirae; Nucleocytoviricota; Pokkesviricetes; Chitovirales; Poxviridae; Chordopoxvirinae; Orthopoxvirus
AGY99208	AGY99208.1		CPXV197 protein [Cowpox virus]	Cowpox virus	MAMFYAHALGGYDENLHAFPGISSTVANDVRKYSVVSVYNNKYDIVKDKYMWCYSQVNKRYIGALLPMFECNEYLQIGDPIHDQEGNQISIVTYRHKNYYALSGIGYESLDLCLEGVGIHHHVLETGNAVYGKVQHDYSTIKEKAKEMNSLSPGPIIDYHVWIGDCVCQVTAVDVHGKEIMRMRFKRGAVLPIPNLVKVKVGEENDTVNLSSAISALLNSGGGTIEVTSKEERVDYVLMKRLESIRHLWSVVYDHFNVVNGEERCYVHMHSSNQSPMLSTVKTNLYMKTMGACLQMDSMEALEYLSKLKESGGRSPRPELQKFEYPDGVEDAGSIERLAEEFFSRSELQAGESVKFGNSINVKSTSVSSKQLRTRIRQQLPSILSSFANTDSGYLFIGV…	504	Viruses; Varidnaviria; Bamfordvirae; Nucleocytoviricota; Pokkesviricetes; Chitovirales; Poxviridae; Chordopoxvirinae; Orthopoxvirus
AGY99415	AGY99415.1		CPXV197 protein [Cowpox virus]	Cowpox virus	MAMFYAHALGGYDENLHAFPGISSTVANDVRKYSVVSVYNNKYDIVKDKYMWCYSQVNKRYIGALLPMFECNEYLQIGDPIHDQEGNQISIVTYRHKNYYALSGIGYESLDLCLEGVGIHHHVLETGNAVYGKVQHDYSTIKEKAKEMNSLSPGPIIDYHVWIGDCICQVTAVDVHGKEIMRMRFKRGAVLQIPNLVKVKVGEENDTVNLSSAISALLNSGGGTIEVTSKEERVDYVLMKRLESIRHLWSVVYDHFDVVNGEERCYVHMHSSNQSPMLSTVKTNLYMKTMGACLQMDSMEALEYLSELKESGGRSPRPELQKFEYPDGVEDAGSIERLAEEFFSRSELQAGESVKFGNSINVKSTSVSAKQLRTRIRQQLPSILSSFANTDGGYLFIGV…	504	Viruses; Varidnaviria; Bamfordvirae; Nucleocytoviricota; Pokkesviricetes; Chitovirales; Poxviridae; Chordopoxvirinae; Orthopoxvirus
AGZ00482	AGZ00482.1		CPXV197 protein [Cowpox virus]	Cowpox virus	MAMFYAHAFGGYDENLHAFPGISSTVANDVRKYSVVSVYNNKYDIVKDKYMWCYSQVNKRYIGALLPMFECNEYLQIGDPIHDQEGNQISIVTYRHKNYYALSGIGYESLDLCLEGVGIHHHVLETGNAVYGKVQHDYSTIKEKAKEMNSLSPGPIIDYHVWIGDCICQVTAVDVHGKEIMRMRFKRGAVLPIPNLVKVKVGEENDTVNLSSSISALLNSGGGTIEVTSKEERVDYVLMKRLESIRHLWSVVYDHFNVVNGEERCYVHMHSSNQSPMLSTVKTNLYMKTMGACLQMDSMEALEYLSELKESGGRSPRPELQKFEYPDGVEDAGSIERLAEEFFSRSELQAGESVKFGNSINVKNTSVSSKQLRTRIRQQLPSILSSFANTDGGYLFIGV…	504	Viruses; Varidnaviria; Bamfordvirae; Nucleocytoviricota; Pokkesviricetes; Chitovirales; Poxviridae; Chordopoxvirinae; Orthopoxvirus
AQQ13047	AQQ13047.1		hypothetical protein [Cowpox virus]	Cowpox virus	MAMFYAHALGGYDENLHAFPGISSTVANDVRKYSVVSVYNNKYDIVKDKYMWCYSQVNKRYIGALLPMFECNEYLQIGDPIHDQEGNQISIITYRHKNYYALSGIGYESLDLCLEGVGIHHHVLETGNAVYGKVQHDYSTIKEKAKEMSTLSPGPIIDYHVWIGDCICQVTAVDVHGKEIMKMRFKKGAVLQIPNLVKVKLGENDTENLSTAISALLNSGGGTIEVTSQEDRVNHVLMKRLESIRHMWSVVYDHFDIVNGKECCYVHMHSSNQNPIPSTVKTNLYMKTMGSCIQMDSMEALEYLSELKESGGRSPRPEMQEFEYPDGVEEDTESIERLAEEFFNRSELQAGESVKFGNSINVKHTSVSAKQLRTRIRQQLPSILSSFANTEGGYLFIGV…	504	Viruses; Varidnaviria; Bamfordvirae; Nucleocytoviricota; Pokkesviricetes; Chitovirales; Poxviridae; Chordopoxvirinae; Orthopoxvirus
AXN74977	AXN74977.1		schlafen-like protein [Akhmeta virus]	Akhmeta virus	MAMFYAHALGGYDENLHAFPGISSTVANDVRKYSVVSVYNNKYDIVKDKYMWCYSQVNKRYIGALLPMFECNEYLQIGVPIHDQEGNQISIITYRHKNYYALSGIGYESLDLCLEGVGIQHHTLEEGNAVYGRVQHDYSIIKDIAKEMNSARPGPIIDYHVWIGDCICQVTAVDVHGKEIMRMRFKKGAVLQIPNLVKVKLGENDTENLSTTISALLNSGGGTIEVTSQEDQVKHVLMKRLESIRRMRSVAYDHFDIVNGKECCYIHMYSSNQNGMPSTVKTNLYMKTMSACIQMDSITALSYLDDLKESGGRCPPELPDIDYEDDEDIEDETTNARLAEEFFNRSELLLGEGFNFNRSINVKVTSISAKNLKPRIKQQLPSIISSFANTDGGYLFIGL…	504	Viruses; Varidnaviria; Bamfordvirae; Nucleocytoviricota; Pokkesviricetes; Chitovirales; Poxviridae; Chordopoxvirinae; Orthopoxvirus
AXN75416	AXN75416.1		schlafen-like protein [Akhmeta virus]	Akhmeta virus	MAMFYAHALGGYDENLHAFPGISSTVANDVRKYSVVSVYNNKYDIVKDKYMWCYSQVNKRYIGALLPMFECNEYLQIGVPIHDQEGNQISIITYRHKNYYALSGIGYESLDLCLEGVGIHHHTLEEGNAVYGRVQHDYSIIKDIAKEMNSDIPGPIIDYHVWIGDCICQVTAVDVHGKEIMRMRFKKGAVLQIPNLVKVKLGENDTENLSTTISALLNSGGGTIEVTSQEDQVKHVLMKRLESIRRMRSVAYDHFDIVNGKECCYIHMYSSNQNGMPSTVKTNLYMKTMSACIQMDSITALSYLDDLKESGGRCPPELPDIDYEDDEDIEDETTNARLAEEFFNRSELLLGEGFNFNRSINVKVTSISAKNLKPRIKQQLPSIISSFANTDGGYLFIGL…	504	Viruses; Varidnaviria; Bamfordvirae; Nucleocytoviricota; Pokkesviricetes; Chitovirales; Poxviridae; Chordopoxvirinae; Orthopoxvirus
AYN64747	AYN64747.1		putative B2R protein [Orthopoxvirus Abatino]	Orthopoxvirus Abatino	MAMFYTHAFGGYDENLHAFPGISSTVANDVRKYSVVSVYNKKYKIVKNKYMWCYSQVNKRYIGALLPMFECNEYLQIGDPIHDLEGNQISIVTYRDKNYYALSGIGYESLDLCLEGVGIHHHTLETGNAVYGKVQHDYSTIKEKAKEMNALSPGPIIDYHVWIGDCICQVTAVDVHGKEIMRMRFKKGAVLPIPNLVKVKLGKNDTENLSSAISALLNSGGGTIEVTTSLEDSVNNVLMKRLETIRNMWSVYDRFNIVNGKECCYVHMHSSNQNPIPSTVKTNLYMKTMGSCIQMDSMEALEYLSELKESGGRSPRPEMQEFEYPDGVEDTESIERLAEEFFNRSELQAGKSVKFGNSINVKHTSVSSKQLRARIRQQLPSILSSFANTDGGYLFIGVD…	504	Viruses; Varidnaviria; Bamfordvirae; Nucleocytoviricota; Pokkesviricetes; Chitovirales; Poxviridae; Chordopoxvirinae; Orthopoxvirus; unclassified Orthopoxvirus
CRL86988	CRL86988.1		CPXV197 protein [Cowpox virus]	Cowpox virus	MAMFYAHAFGGYDENLHAFPGISSTVANDVRKYSVVSVYNNKYDIVKDKYMWCYSQVNKRYIGALLPMFECNEYLQIGDPIHDQEGNQISIVTYRHKNYYALSGIGYESLDLCLEGVGIHHHVLETGNAVYGKVQHDYSTIKEKVKEMSALSPGPIIDYHVWIGDCVCQVTAVDVHGKEIMRMRFKKGAVLPIPNLVKVKVGEENDTVNLSTSISALLNSGGGTIEVTSKEERVDYVLMKRLESIRHLWSVVYDHFDVVNGKERCYVHMHSSNQSPMLSTVKTNLYMKTMGACLQMDSMEALEYLSELKESGGRSPRPELQKFEYPDGVEDAGSIERLAEEFFSRSELQAGESVKFGNSINVKNTSVSSKQLRTRIRQQLPSILSSFANTDGGYLFIGV…	504	Viruses; Varidnaviria; Bamfordvirae; Nucleocytoviricota; Pokkesviricetes; Chitovirales; Poxviridae; Chordopoxvirinae; Orthopoxvirus
QEQ49523	QEQ49523.1		Schlafen [Akhmeta virus]	Akhmeta virus	MAMFYAHALGGYDENLHAFPGISSTVANDVRKYSVVSVYNNKYDIVKDKYMWCYSQVNKRYIGALLPMFECNEYLQIGVPIHDQEGNQISIITYRHKNYYALSGIGYESLDLCLEGVGIHHHTLEEGNAVYGRVQHDYSIIKDIAKEMNSARPGPIIDYHVWIGDCICQVTAVDVHGKEIMRMRFKKGAVLQIPNLVKVKLGENDTENLSTTISALLNSGGGTIEVTSQEDQVKHVLMKRLESIRRMRSVAYDHFDIVNGKECCYIHMYSSNQNGMPSTVKTNLYMKTMSACIQMDSITALSYLDDLKESGGRCPPELPDIDYEDDEDIEDETTNARLAEEFFNRSELLLGEGFNFNRSINVKVTSISAKNLKPRIKQQLPSIISSFANTDGGYLFIGL…	504	Viruses; Varidnaviria; Bamfordvirae; Nucleocytoviricota; Pokkesviricetes; Chitovirales; Poxviridae; Chordopoxvirinae; Orthopoxvirus
QEQ49736	QEQ49736.1		Schlafen [Akhmeta virus]	Akhmeta virus	MAMFYAHALGGYDENLHAFPGISSTVANDVRKYSVVSVYNNKYDIVKDKYMWCYSQVNKRYIGALLPMFECNEYLQIGVPIHDQEGNQISIITYRHKNYYALSGIGYESLDLCLEGVGIHHHTLEEGNAVYGRVQHDYSIIKDIAKEMNSVIPGPIIDYHVWIGDCICQVTAVDVHGKEIMRMRFKKGAVLQIPNLVKVKLGENDTENLSTTISALLNSGGGTIEVTSQEDQVKHVLMKRLESIRRMRSVAYDHFDIVNGKECCYIHMYSSNQNGMPSTVKTNLYMKTMSACIQMDSITALSYLDDLKESGGRCPPELPDIDYEDDEDIEDETTNARLAEEFFNRSELLLGEGFNFNRSINVKVTSISAKNLKPRIKQQLPSIISSFANTDGGYLFIGL…	504	Viruses; Varidnaviria; Bamfordvirae; Nucleocytoviricota; Pokkesviricetes; Chitovirales; Poxviridae; Chordopoxvirinae; Orthopoxvirus
SNB49432	SNB49432.1		CPXV197 protein [Cowpox virus]	Cowpox virus	MAMFYAHAFGGYDENLHAFPGISSTVANDVRKYSVVSVYNNKYDIVKDKYMWCYSQVNKRYIGALLPMFECNEYLQIGDPIHDQEGNQISIVTYRHKNYYALSGIGYESLDLCLEGVGIHHHVLETGNAVYGKVQHDYSTIKEKVKEMNSLSPGPIIDYHVWIGDCVCQVTAVDVHGKEIMRMRFKKGAVLPIPNLVKVKVGEENDTVNLSTSISALLNSGGGTIEVTSKEERVDYVLMKRLESIRHLWSVVYDHFDVVNGKERCYVHMHSSNQSPMLSTVKTNLYMKTMGACLQMDSMEALEYLSELKESGGRSPRPELQKFEYPDGVEDAGSIERLAEEFFSRSELQAGESVKFGNSINVKNTSVSSKQLRTRIRQQLPSILSSFANTDGGYLFIGV…	504	Viruses; Varidnaviria; Bamfordvirae; Nucleocytoviricota; Pokkesviricetes; Chitovirales; Poxviridae; Chordopoxvirinae; Orthopoxvirus
AAU01367	AAU01367.1		MPXV-WRAIR157 [Monkeypox virus]	Monkeypox virus	MAMFYAHAFGGYDENLHAFPGISSTVANDVRKYSVVSVYNKKYNIVKNKYMWCNSQVNKRYIGALLPMFECNEYLQIGDPIHDLEGNQISIVTYRHKNYYALSGIGYESLDLCLEGVGIHHHVLETGNAVYGKVQHEYSTIKEKAKEMNALKPGPIIDYHVWIGDCVCQVTTVDVHGKEIMRMRFKRGAVLPIPNLVKVKVGEENDTINLSTSISALLNSGGGTIEVTSKEERVDYVLMKRLESIHHLWSVVYDHLNVVNGEERCYVHMHSSHQSPMLSTVKTNLYMKTMGACLQMDSMEALEYLSELKESGGRSPRPELQKFEYPDGVKDTESIERLAEEFFNRSELQAGESVKFGNSINVKHTSVSAKQLRTRIRQQLPSILSSFANTKGGYLFIGV…	505	Viruses; Varidnaviria; Bamfordvirae; Nucleocytoviricota; Pokkesviricetes; Chitovirales; Poxviridae; Chordopoxvirinae; Orthopoxvirus
AAY96971	AAY96971.1		unknown [Monkeypox virus]	Monkeypox virus	MAMFYAHAFGGYDENLHAFPGISSTVANDVRKYSVVSVYNKKYNIVKNKYMWCNSQVNKRYIGALLPMFECNEYLQIGDPIHDLEGNQISIVTYRHKNYYALSGIGYESLDLCLEGVGIHHHVLETGNAVYGKVQHEYSTIKEKAKEMNALKPGPIIDYHVWIGDCVCQVTTVDVHGKEIMRMRFKRGAVLPIPNLVKVKVGEENDTINLSTSISALLNSGGGTIEVTSKEERVDYVLMKRLESIHHLWSVVYDHLNVVNGEERCYVHMHSSHQSPMLSTVKTNLYMKTMGACLQMDSMEALEYLSELKESGGRSPRPELQKFEYPDGVKDTESIERLAEEFFNRSELQAGESVKFGKSINVKHTSVSAKQLRTRIRRQLPSILSSFANTKGGYLFIGV…	505	Viruses; Varidnaviria; Bamfordvirae; Nucleocytoviricota; Pokkesviricetes; Chitovirales; Poxviridae; Chordopoxvirinae; Orthopoxvirus
ADZ30584	ADZ30584.1		hypothetical protein CPXV_NOR1994_MAN_185 [Cowpox virus]	Cowpox virus	MAMFYAHAFGGYDENLHAFPGISSTVANDVRKYSVVSVYNKKYKIVKNKYMWCYSQVNKRYIGALLPMFECNEYLQIGDPIHDLEGNQISIVTYHNKNYYALSGIGCDSLDLCLEGVGIHHHTLEAGNAVYGKVQHDYYTIKEKAKEMNALKPGPIIDYHVWIGDCVCQVTAVDVHGKEIMRMRFKRGAVLPIPNLVKVKVGEENDTVNLSTSISALLNSGGGTIEVTSKEERVDYVLMKRLESIRHLWSVVYDHFNVVNGKERCYVHMHSSNQSPMLSTVKTNLYMKTMGACLQMDSMEALEYLSELKESGGRSPRPELQKFEYPDGVETVDLIERFAEEFFSRSELQAGESVKFGNSINVKHTSVSSKQLRTRIRQQLPSILSSFANTDGGYLFIGV…	505	Viruses; Varidnaviria; Bamfordvirae; Nucleocytoviricota; Pokkesviricetes; Chitovirales; Poxviridae; Chordopoxvirinae; Orthopoxvirus
ADZ30796	ADZ30796.1		hypothetical protein CPXV_UK2000_K2984_185 [Cowpox virus]	Cowpox virus	MAMFYAHAFGGYDENLHAFPGISSTVANDVRKYSLVSVYNNKYKIVKNKYMWCYSQVNKRYIGALLPMFECNEYLQIGDPIHDLEGNQISIVTYRHKNYYALSGIGYESLDLCLEGVGIHHHTLEAGNAVYGKVQHDYSTIKEKAKEMNALSPGPIIDYHVWIGDCVCQVTAVDVHGKEIMRMRFKKGAVLPIPNLVKVKLGEENDTVNLSTSISALLNSGGGTIEVTSKEERVDYVLMKRLESIRHLWSVVYDHFDVVNGKERCYVHMHSSNQSPMLSTVKTNLYMKTMGACLQMDYMEALEYLSELKESGGRSPRPELPEFEYPDGVEDAGSIERLAEEFFSRSELQADEPVNFCNSINVKHTSVSAKQLRTRIRQQLPSILSSFANTDGGYLFIGV…	505	Viruses; Varidnaviria; Bamfordvirae; Nucleocytoviricota; Pokkesviricetes; Chitovirales; Poxviridae; Chordopoxvirinae; Orthopoxvirus
AGY97706	AGY97706.1		CPXV197 protein [Cowpox virus]	Cowpox virus	MAMFYTHAFGGYDENLHAFPGISSTVANDVRKYSVVSVYNKKYKIVKNKYMWCYSQVNKRYIGALLPMFECNEYLQIGDPIHDLEGNQISIVTYRHKNYYALSGIGYESLDVCLEGVGIHHHTLEAGNAVYGKVQHDYYTIKEKAKEMNSLSPGPIIDYHVWIGDCVCQVTAVDVHGKEIMRMRFKKGAVLPIPNLVKVKVGEENDTVNLSTSISALLNSGGGTIEVTSKEERVDYVLMKRLESIRHLWSVVYDHFDVVNGKERCYVHMHSSNQSPMLSTVKTNLYMKTMGACLQMDYMEALEYLSELKESGGRSPRPELPEFEYPDGVEDAGSIERFAEEFFSRSELQAGEPVKFGNSINVKHTSVSSKQLRTRIRQQLPSILSSFANTDGGYLFIGV…	505	Viruses; Varidnaviria; Bamfordvirae; Nucleocytoviricota; Pokkesviricetes; Chitovirales; Poxviridae; Chordopoxvirinae; Orthopoxvirus
AIE40776	AIE40776.1		hypothetical protein MPXV-W_Nigeria-156 [Monkeypox virus]	Monkeypox virus	MAMFYAHAFGGYDENLHAFPGISSTVANDVRKYSVVSVYNKKYNIVKNKYMWCNSQVNKRYIGALLPMFECNEYLQIGDPIHDLEGNQISIVTYRHKNYYALSGIGYESLDLCLEGVGIHHHVLETGNAVYGKVQHEYSTIKEKAKEMNALKPGPIIDYHVWIGDCVCQVTTVDVHGKEIMRMRFKRGAVLPIPNLVKVKVGEENDTINLSTSISALLNSGGGTIEVTSKEERVDYVLMKRLESIHHLWSVVYDHLNVVNGEERCYVHMHSSHQSPMLNTVKTNLYMKTMGACLQMDSMEALEYLSELKESGGRSPRPELQKFEYPDGVKDTESIERLAEEFFNRSELQAGESVKFGNSINVKHTSVSAKQLRTRIRQQLPSILSSFANTKGGYLFIGV…	505	Viruses; Varidnaviria; Bamfordvirae; Nucleocytoviricota; Pokkesviricetes; Chitovirales; Poxviridae; Chordopoxvirinae; Orthopoxvirus
ARR29774	ARR29774.1		CPXV197 protein [Cowpox virus]	Cowpox virus	MAMFYAHAFGGYDENLHAFPGISSTVANDVRKYSGVSVYNNKYDIVKDKYMWCYSYVNKRYIGALLPMFECNEYLQIGDPIHDLEGNQISIVTYRHKNYYALSGIGYESLDLCLEGVGIHHHTLEAGNAVYGKVQHDYSTIKEKAKEMNSLSPGPIIDYHVWIGDCVCQVTAVDVHGKEIMRMRFKKGAVLPIPNLVKVKLGEENDTVNLSTSISALLNSGGGTIEVTSKEERVDYVLMKRLESIRHLWSVVYDHFDVVNGKERCYVHMHSSNQSPMLSTVKTNLYMKTMGACLQMDYMEALEYLSELKESGGRSPRPELPEFEYPDGVEDAGSIERLAEEFFSRSELQADEPVNFCNSVNVKNTSVSAKQLRTRIRQQLPSILSSFANTDGGYLFIGV…	505	Viruses; Varidnaviria; Bamfordvirae; Nucleocytoviricota; Pokkesviricetes; Chitovirales; Poxviridae; Chordopoxvirinae; Orthopoxvirus
ARR29978	ARR29978.1		CPXV197 protein [Cowpox virus]	Cowpox virus	MAMFYAHAFGGYDENLHAFPGISSTVANDVRKYSVVSVYNNKYKIVKNKYMWCYSQVNKRYIGALLPMFECNEYLQIGDPIHDLEGNQISIVTYRHKNYYALSGIGYESLDLCLEGVGIHHHTLEAGNAVYGKVQHDYSTIKEKAKEMNSLSPGPIIDYHVWIGDCVCQVTAVDVHGKEIMRMRFKKGAVLPIPNLVKVKLGEENDTVNLSTSISALLNSGGGTIEVTSKEERVDYVLMKRLESIRHLWSVVYDHFDVVNGKERCYVHMHSSNQSPMLSTVKTNLYMKTMGACLQMDYMEALEYLSELKESGGRSPRPELPEFEYPDGVEDAGSIERLAEEFFSRSELQADEPVNFCNSINVKHTSVSAKQLRTRIRQQLPSILSSFANTDGGYLFIGV…	505	Viruses; Varidnaviria; Bamfordvirae; Nucleocytoviricota; Pokkesviricetes; Chitovirales; Poxviridae; Chordopoxvirinae; Orthopoxvirus
ARR30598	ARR30598.1		CPXV197 protein [Cowpox virus]	Cowpox virus	MAMFYAHAFGGYDENLHAFPGISSTVANDVRKYSVVSVYNNKYKIVKNKYMWCYSQVNKRYIGALLPMFECNEYLQIGDPIHDLEGNQISIVTYRHKNYYALSGIGYESLDLCLEGVGIHHHTLEAGNAVYGKVQHDYSTIKEKAKEMNALSPGPIIDYHVWIGDCVCQVTAVDVHGKEIMRMRFKKGAVLPIPNLVKVKLGEENDTVNLSTSISALLNSGGGTIEVTSKEERVDYVLMKRLESIRHLWSVVYDHFDVVNGKERCYVHMHSSNQSPMLSTVKTNLYMKTMGACLQMDYMEALEYLSELKESGGRSPRPELPEFEYPDGVEDAGSIERLAEEFFSRSELQADEPVNFCNSINVKHTSVSAKQLRTRIRQQLPSILSSFANTDGGYLFIGV…	505	Viruses; Varidnaviria; Bamfordvirae; Nucleocytoviricota; Pokkesviricetes; Chitovirales; Poxviridae; Chordopoxvirinae; Orthopoxvirus
ATB55462	ATB55462.1		CPXV197 protein [Cowpox virus]	Cowpox virus	MAMFYAHAFGGYDENLHAFPGISSTVANDVRKYSVVSVYNKKYKIVKNKYMWCYSQVNKRYIGALLPMFECNDYLQIGDPIHDLEGNQISIVTYRHKNYYALSGIGYESLDVCLEGVGIHHHTLEAGNAVYGKVQHEYHTIKEKAKEMNSLSPGPIIDYHVWIGDCVCQVTAVDVHGKEIMRMRFKKGAVLPIPNLVKVKVGEENDTVNLSTSISALLNSGGGTIEVTSKEERVDYVLMKRLESIRHLWSVVYDHFDVVNGKERCYVHMHSSNQSPMLSTVKTNLYMKTMGACLQMDYMEALEYLSELKESGGRSPRPELPEFEYPDGVEDAGSIERFAEEFFSRSELQAGESVKFGNSINVKHTSVSSKQLRTRIRQQLPSILSSFANTDGGYLFIGV…	505	Viruses; Varidnaviria; Bamfordvirae; Nucleocytoviricota; Pokkesviricetes; Chitovirales; Poxviridae; Chordopoxvirinae; Orthopoxvirus
ATB56106	ATB56106.1		CPXV197 protein [Cowpox virus]	Cowpox virus	MAMFYAHAFGGYDENLHAFPGISSTVANDVRKYSIVSVYNKKYKIVKNKYMWCYSQVNKRYIGALLPMFECNDYLQIGDPIHDLEGNQISIVTYRHKNYYALSGIGYESLDVCLEGVGIHHHTLEAGNAVYGKVQHEYHTIKEKAKEMNSLSPGPIIDYHVWIGDCVCQVTAVDVHGKEIMRMRFKKGAVLPIPNLVKVKVGEENDTVNLSTSISALLNSGGGTIEVTSKEERVDYVLMKRLESIRHLWSVVYDHFDVVNGKERCYVHMHSSNQSPMLSTVKTNLYMKTMGACLQMDYMEALEYLSELKESGGRSPRPELPEFEYPDGVEDAGSIERFAEEFFSRSELQAGESVKFGNSINVKHTSVSSKQLRTRIRQQLPSILSSFANTDGGYLFIGV…	505	Viruses; Varidnaviria; Bamfordvirae; Nucleocytoviricota; Pokkesviricetes; Chitovirales; Poxviridae; Chordopoxvirinae; Orthopoxvirus
AUW64391	AUW64391.1		hypothetical protein MPXV298464_139 [Monkeypox virus]	Monkeypox virus	MAMFYAHAFGGYDENLHAFPGISSTVANDVRKYSVVSVYNKKYNIVKNKYMWCNSQVNKRYIGALLPMFECNEYLQIGDPIHDLEGNQISIVTYRHKNYYALSGIGYESLDLCLEGVGIHHHVLETGNAVYGKVQHEYSTIKEKAKEMNALKPGPIIDYHVWIGDCVCQVTTVDVHGKEIMRMRFKRGAVLPIPNLVKVKVGEENDTINLSTSISALLNSGGGTIEVTSKEERVDYVLMKRLESIHHLWSVVYDHLNVVNGEERCYVHMHSSHQSPMLSTVKTNLYMKTMGACLQMDSMEALEYLSELKESGGRSPRPELQKFEYPDGVKDTESIERLAEEFFNRSELQAGESVKFGNSINVKHTSVSAKQLRTRIRQQLPSILSSFANTKGGYLFIGV…	505	Viruses; Varidnaviria; Bamfordvirae; Nucleocytoviricota; Pokkesviricetes; Chitovirales; Poxviridae; Chordopoxvirinae; Orthopoxvirus
NP_619978	NP_619978.1		CPXV197 protein [Cowpox virus]	Cowpox virus	MAMFYAHAFGGYDENLHAFPGISSTVANDVRKYSVVSVYNNKYDIVKDKYMWCYSYVNKRYIGALLPMFECNEYLQIGDPIHDLEGNQISIVTYRHKNYYALSGIGYESLDLCLEGVGIHHHTLEAGNAVYGKVQHDYSTIKEKAKEMNSLSPGPIIDYHVWIGDCVCQVTAVDVHGKEIMRMRFKKGAVLPIPNLVKVKLGEENDTVNLSTSISALLNSGGGTIEVTSKEERVDYVLMKRLESIRHLWSVVYDHFDVVNGKERCYVHMHSSNQSPMLSTVKTNLYMKTMGACLQMDYMEALEYLSELKESGGRSPRPELPEFEYPDGVEDAGSIERLAEEFFSRSELQADEPVNFCNSINVKHTSVSAKQLRTRIRQQLPSILSSFANTDGGYLFIGV…	505	Viruses; Varidnaviria; Bamfordvirae; Nucleocytoviricota; Pokkesviricetes; Chitovirales; Poxviridae; Chordopoxvirinae; Orthopoxvirus
QEM24903	QEM24903.1		CPXV197 protein [Cowpox virus]	Cowpox virus	MAMFYAHAFGGYDENLHAFPGISSTVANDVRKYSVVSVYNNKYKIVKNKYMWCYSQVNKRYIGALLPMFECNEYLQIGDPIHDLEGNQISIVTYRHKNYYALSGIGYESLDLCLEGVGIHHHTLEAGNAVYGKVQHDYSTIKEKAKEMNALSPGPIIDYHVWIGDCVCQVTAVDVHGKEIMRMRFKKGAVLPIPNLVKVKLGEENDTVNLSTSISALLNSGGGTIEVTSKEERVDYVLMKRLESIRHLWSVVYDHFDVVNGKERCYVHMHSSNQSPMLSTVKTNLYMKTMGACLQMDYMEALEYLSELKESGGRSPRPELPEFEYPDGVEDAGSIERLAEEFFSRSELQADEPVNFCNSINVKHTSVSAKQLRTRIRQQLPSILSSFANTDGGYLFIGV…	505	Viruses; Varidnaviria; Bamfordvirae; Nucleocytoviricota; Pokkesviricetes; Chitovirales; Poxviridae; Chordopoxvirinae; Orthopoxvirus
QEM25256	QEM25256.1		CPXV197 protein [Cowpox virus]	Cowpox virus	MAMFYAHALGGYDENLHAFPGISSTVANDVRKYSVVSVYNNKYDIVKDKYMWCYSQVNKRYIGALLPMFECNEYLQIGDPIHDQEGNQISIITYRHKNYYALSGIGYESLDLCLEGVGIHHHVLETGNAVYGKVQHDYSTIKEKAKEMSALSPGPIIDYHVWIGDCICQVTAVDVHGKEIMKMRFKKGAVLQIPNLVKVKLGEENDTENLSTSISALLNSGGGTIEVTSKEERVDYVLMKRLESIRHLWSVVYDHFDIVNGKECCYVHMHSSNQNPIPSTVKTNLYMKTMGSCLQMDSMEALEYLSELKESGGRSPRPELPEFEYPDGVEDAGSIERLAEEFFSRSELQADEPVNFCNSINVKHTSVSAKQLRTRIRQQLPSILSSFANTKGGYLFIGV…	505	Viruses; Varidnaviria; Bamfordvirae; Nucleocytoviricota; Pokkesviricetes; Chitovirales; Poxviridae; Chordopoxvirinae; Orthopoxvirus
SNB54269	SNB54269.1		CPXV197 protein [Cowpox virus]	Cowpox virus	MAMFYAHAFGGYDENLHAFPGISSTVANDVRKYSVVSVYNKKYKIVKNKYMWCYSQVNKRYIGALLPMFECNEYLQIGDPIHDLEGNQISIVTYRNKNYYALSGIGYESLDLCLEGVGIHHHTLEAGNAVYGKVQHDYHTIKEKAKEMNALKPGPIIDYHVWIGDCVCQVTAVDVHGKEIMRMRFKRGAMLPIPNLVKVKVGEENDTVNLSTSISALLNSGGGTIEVTSKEERVDYVLMKRLESIRHMWSVVYDHFDVVNGEERCYVHMHSSNQSPMLSTVKTNLYMKTMGACLQMDYMEALEYLSELKESGGRSPRPELQKFEYPDGVETVDLIERFAEEFFSRSELQAGESVKFGNSINVKHTSVSSKQLRTRIRQQLPSILSSFANTDGGYLFIGV…	505	Viruses; Varidnaviria; Bamfordvirae; Nucleocytoviricota; Pokkesviricetes; Chitovirales; Poxviridae; Chordopoxvirinae; Orthopoxvirus
QED21131	QED21131.1		Schlafen-like virulence protein [Alaskapox virus]	Alaskapox virus	MAMARFYAHSLGGYDENLHAFPGLSSTVANDVRKYSVVSVYNTKYHIVKDKYMWCYSYVENRYIGALLPVFECDEYLQIGSPIHDEEGNQISIVTYRHKKYYALSGIGYESLDLCLEGVGIHHHALEAGNAVYGKVQHDYSTIKDIAKEMNSASPGPIIDYHVWVGDCLCQVTAVDVHGKEIMRIRFKRGAMLPIPNLVKFTFGENDTENLSSAISALLNSGGGIIEVTIQKGQSDYSLMKHLESIRRIWSVSDHINITNGKKHCYLHMYSPIKNRIPSTVKTNLYMRSMTSCIQMDPITALSYLDELKELGGRCPRPELTDDARRDGVEDETSIELLAEKLFNSSRLQADEEFNFTRSTNVKFTSISAKHLKTRIKQQIPSTISSFANTDGGYFFIGL…	506	Viruses; Varidnaviria; Bamfordvirae; Nucleocytoviricota; Pokkesviricetes; Chitovirales; Poxviridae; Chordopoxvirinae; Orthopoxvirus; unclassified Orthopoxvirus
YP_009143488	YP_009143488.1		Schlafen-like protein [Raccoonpox virus]	Raccoonpox virus	MAVFKPHSLGGYDENLHSFPGLSSTVANDVRNHSSIVVFGAKYDIIKDKYIWCFSYVKNRYIGALLPMFECKDHLQIGDPIYDTEGSQISIVTYRHKQYYALSGIGYESLDLSLDGIGVHHHILEEGKAVYGKIQRDYTAIKELAKEMNSIEAGPIVDYHIWIGESICQITAVDENGKEVMRVRFKKGAVLQIPNTIRVQLGQNDNENLFSAISALLNSGGGVIEVTIPECDNPQYTLMKRIVAIREWIHVHDHIDIIDRNERCYMRVYACNEKYRFPSTRKTNLYIRTMISSIQINYYAAMNFLCELKETGGRSPRLIPKIEYRDQVEDEGLIEILADELFSRASLQANESFNFTRSTNVKVTSISGKQLRTRLRQQLPSTIASFANTEGGFLFIGLD…	506	Viruses; Varidnaviria; Bamfordvirae; Nucleocytoviricota; Pokkesviricetes; Chitovirales; Poxviridae; Chordopoxvirinae; Orthopoxvirus
YP_009281928	YP_009281928.1		schlafen [Volepox virus]	Volepox virus	MAVFNSHFLGGYDENLHSFPGLSSTVANDVRNHSSISVYKAKFNIVKDKYMWCYSYVKNRYIGALLPMFECNEYLQIGDPIYDTEGKQISIVTYRHKQYYALSGIGYESLDVSLDGIGIHHHILEEGKAVYGSVQRDYDAIKELAKEMKYIESGPIVDYHIWIGESICQITAVDENRKEVMRVRFKKGAVLQIPNTIRLLLGKNDNENLFSAVSALLNSGGGTIEVRIPECRRMHYTVMKRLEDMREWISIHDHIEIVDGNECCYVHVYSSNREQHRFPSTRKTNLFIRTMTSSIQMNYHSAMEFLTYLSETGGRSPKPELSEHYHQDKDVIEDEHSIERLADELFNRASLQLNETFNFTRSVNVKVTASSGKQLRTRLKQQLPSTVASFANTDGGYLF…	509	Viruses; Varidnaviria; Bamfordvirae; Nucleocytoviricota; Pokkesviricetes; Chitovirales; Poxviridae; Chordopoxvirinae; Orthopoxvirus
YP_009282874	YP_009282874.1		schlafen [Skunkpox virus]	Skunkpox virus	MAVFNSHSLGGYDENLHSFPGLSSTVANDVRNHSVISVLGAKFNIVKDKYMWCYSYVKNRYIGALLPMFECNDYLQIGDPIHDTEGNQISIITYRHKQYYALSGIGYESLDVSLNGIGIHHHILEEGKAVYGKVQRDYTAIKELAKEMNYIGSGPIVEYHIWIGASICQITAVDENGKEVMRVRIKKGAVLQIPNMIRVQLGKNDNENLFSAISALLNSGGGTIEVHIPDCRRIHYSLMKRLEYLREWISIHDHIDIVDGNQCCYIHVYSSNKELKFPSTRKTNLIIRTMTSSVQMNHHSAMEFLNYLSEIGGRSPKPELPEYDHQDGVEDEDLIERLAEDLFNRASLQANESFNFTRSVNVKVTSISGKQLRTRLKQQLPSTVASFANTDGGYLFIGL…	510	Viruses; Varidnaviria; Bamfordvirae; Nucleocytoviricota; Pokkesviricetes; Chitovirales; Poxviridae; Chordopoxvirinae; Orthopoxvirus
ADZ29515	ADZ29515.1		hypothetical protein CPXV_FRA2001_NANCY_185 [Cowpox virus]	Cowpox virus	MELCKIFVDKKIKNNVVIITLASATENMAMFYAHAFGGYDENLHAFPGISSTVANDVRKYSVVSVYNKKYKIVKDKYMWCYSQVNKRYIGALLPMFECNEYLQIGDPIHDLEGNQISIVTYRHKNYYALSGIGYESLDVCLEGVGIHHHTLEAGNAVYGKVQHDYYTIKEKAKEMNSLSPGPIIDYHVWIGDCVCQVTAVDVHGKEIMRMRFKRGAVLPIPNLVKVKVGEENDTVNLSTSISALLNSGGGTIEVTSKEEHVDYVLMKRLESIRHLWSVVYDHFDVVNGKERCYVHMHSSNQSPMLSTVKTNLYMKTMGACLQMDSMEALEYLSELKESGGRSPRPELQKFEYPDGVEDAGSIERLAEEFFSRSELQAGEPVKFGNSINVKHTSVSSKQL…	531	Viruses; Varidnaviria; Bamfordvirae; Nucleocytoviricota; Pokkesviricetes; Chitovirales; Poxviridae; Chordopoxvirinae; Orthopoxvirus
ADZ29730	ADZ29730.1		hypothetical protein CPXV_GER1980_EP4_185 [Cowpox virus]	Cowpox virus	MELCKIFVDKKIKNNVVIITLASATENMAMFYAHALGGYDENLHAFPGISSTVANDVRKYSVVSVYNNKYDIVKDKYMWCYSQVNKRYIGALLPMFECNEYLQIGDPIHDQEGNQISIVTYRHKNYYALSGIGYESLDLCLEGVGIHHHVLETGNAVYGKVQHDYSTIKEKAKEMNSLSPGPIIDYHVWIGDCICQVTAVDVHGKEIMRMRFKRGAVLPIPNLVKVKVGEENDTVNLSTSISALLNSGGGTIEVTSKEERVDYVLMKRLESIRHLWSVVYDHFDVVNGEERCYVHMHSSNQSPMLSTVKTNLYMKTMGACLQMDSMEALEYLSELKESGGRSPRPELQKFEYPDGVEDAGSIERLAEEFFSRSELQAGESVKFGNSINVKSTSVSAKQL…	531	Viruses; Varidnaviria; Bamfordvirae; Nucleocytoviricota; Pokkesviricetes; Chitovirales; Poxviridae; Chordopoxvirinae; Orthopoxvirus
ADZ30159	ADZ30159.1		hypothetical protein CPXV_GER1998_2_185 [Cowpox virus]	Cowpox virus	MELCKIFVDKKIKNNLVIITLASATENMAMFYAHAFGGYDENLHAFPGISSTVANDVRKYSVVSVYNNKYDIVKDKYMWCYSQVNKRYIGALLPMFECNEYLQIGDPIHDQEGNQISIVTYRHKNYYALSGIGYESLDLCLEGVGIHHHVLETGNAVYGKVQHDYSTIKEKAKEMNSLSPGPIIDYHVWIGDCVCQVTAVDVHGKEIMRMRFKKGAVLPIPNLVKVKVGEKNDTVNLSTSISALLNSGGGTIEVTSKEERVDYVLMKRLESIRHLWSVVYDHFDVVNGKERCYVHMHSSNQSPMLSTVKTNLYMKTMGACLQMDSMEALEYLSELKESGGRSPRPELQKFEYPDGVEDAGSIERLAEEFFSRSELQAGESVKFGNSINVKNTSVSSKQL…	531	Viruses; Varidnaviria; Bamfordvirae; Nucleocytoviricota; Pokkesviricetes; Chitovirales; Poxviridae; Chordopoxvirinae; Orthopoxvirus
ADZ30373	ADZ30373.1		hypothetical protein CPXV_GER2002_MKY_185 [Cowpox virus]	Cowpox virus	MELCKIFVDKKIKNNVVIITLASATENMAMFYAHALGGYDENLHAFPGISSTVANDVRKYSVVSVYNNKYDIVKDKYMWCYSQVNKRYIGALLPMFECNEYLQIGDPIHDQEGNQISIVTYRHKNYYALSGIGYESLDLCLEGVGIHHHVLETGNAVYGKVQHDYSTIKEKAKEMNSLSPGPIIDYHVWIGDCICQVTAVDVHGKEIMRMRFKRGAVLPIPNLVKVKVGEENDTVNLSSAISALLNSGGGTIEVTSKEERVDYVLMKRLESIRHLWSVVYDHFDVVNGEERCYVHMHSSNQSPMLSTVKTNLYMKTMGACLQMDSMEALEYLSELKESGGRSPRPELQKFEYPDGVEDAGSIERLAEEFFSRSELQAGESVKFGNSINVKSTSVSAKQL…	531	Viruses; Varidnaviria; Bamfordvirae; Nucleocytoviricota; Pokkesviricetes; Chitovirales; Poxviridae; Chordopoxvirinae; Orthopoxvirus
ARB50413	ARB50413.1		hypothetical protein [Cowpox virus]	Cowpox virus	MELCKIFVDKKIKNNVVIITLASATENMAMFYAHALGGYDENLHAFPGISSTVANDVRKYSVVSVYNNKYDIVKDKYMWCYSQVNKRYIGALLPMFECNEYLQIGDPIHDQEGNQISIVTYRHKNYYALSGIGYESLDLCLEGVGIHHHVLETGNAVYGKVQHDYSTIKEKAKEMSALSPGPIIDYHVWIGDCICQVTAVDVHGKEIMRMRFKRGAVLPIPNLVKVKVGEENDTVNLSTSISALLNSGGGTIEVTSKEERVDYVLMKRLESIRHLWSVVYDHFDVVNGEERCYVHMHSSNQSPMLSTVKTNLYMKTMGACLQMDSMEALEYLSELKESGGRSPRPELQKFEYPDGVEDAGSIERLAEEFFSRSELQAGESVKFGNSINVKSTSVSAKQL…	531	Viruses; Varidnaviria; Bamfordvirae; Nucleocytoviricota; Pokkesviricetes; Chitovirales; Poxviridae; Chordopoxvirinae; Orthopoxvirus
SNB49083	SNB49083.1		CPXV197 protein [Cowpox virus]	Cowpox virus	MELCKIFVDKKIKNNVVIITLASATENMAMFYAHALGGYDENLHAFPGISSTVANDVRKYSVVSVYNNKYDIVKDKYMWCYSQVNKRYIGALLPMFECNEYLQIGDPIHDQEGNQISIVTYRHKNYYALSGIGYESLDLCLEGVGIHHHVLETGNAVYGKVQHDYSTIKEKAKEMNSLSPGPIIDYHVWIGDCICQVTAVDVHGKEIMRMRFKRGAVLQIPNLVKVKVGEENDTVNLSSAISALLNSGGGTIEVTSKEERVDYVLMKRLESIRHLWSVVYDHFDVVNGEERCYVHMHSSNQSPMLSTVKTNLYMKTMGACLQMDSMEALEYLSELKESGGRSPRPELQKFEYPDGVEDAGSIERLAEEFFSRSELQAGESVKFGNSINVKSTSVSAKQL…	531	Viruses; Varidnaviria; Bamfordvirae; Nucleocytoviricota; Pokkesviricetes; Chitovirales; Poxviridae; Chordopoxvirinae; Orthopoxvirus
SPN69159	SPN69159.1		CPXV197 protein [Cowpox virus]	Cowpox virus	MELCKIFVDKKIKNNVVIITLASATENMAMFYAHALGGYDENLHAFPGISSTVANDVRKYSVVSVYNNKYDIVKDKYMWCYSQVNKRYIGALLPMFECNEYLQIGDPIHDQEGNQISIVTYRHKNYYALSGIGYESLDLCLEGVGIHHHVLETGNAVYGKVQHDYSTIKEKAKEMSALSPGPIIDYHVWIGDCICQVTAVDVHGKEIMRMRFKRGAVLPIPNLVKVKVGEENDTVNLSTSISALLNSGGGTIEVTSKKERVDYVLMKRLESIRHLWSVVYDHFDVVNGEERCYVHMHSSNQSPMLSTVKTNLYMKTMGACLQMDSMEALEYLSELKESGGRSPRPELQKFEYPDGVEDAGSIERLAEEFFSRSELQAGESVKFGNSINVKSTSVSAKQL…	531	Viruses; Varidnaviria; Bamfordvirae; Nucleocytoviricota; Pokkesviricetes; Chitovirales; Poxviridae; Chordopoxvirinae; Orthopoxvirus
ADZ29943	ADZ29943.1		hypothetical protein CPXV_GER1990_2_185 [Cowpox virus]	Cowpox virus	MELCKIFVDKKIKNNVVIITLASATENMAMFYAHAFGGYDENLHAFPGISSTVANDVRKYSVVSVYNKKYKIVKNKYMWCYSQVNKRYIGALLPMFECNEYLQIGDPIHDLEGNQISIVTYRNKNYYALSGIGYESLDVCLEGVGIHHHTLEAGNAVYGKVQHDYYTIKEKAKEMNSLSPGPIIDYHVWIGDCVCQVTAVDVHGKEIMRMRFKKGAMLPIPNLVKVKVGEENDTVNLSTSISALLNSGGGTIEVTSKEERVDYVLMKRLESIRHLWSVVYDHFDVVNGKERCYVHMHSSNQSPMLSTVKTNLYMKTMGACLQMDYMEALEYLSELKESGGRSPRPELPEFEYPDGVEDAGSIERFAEEFFSRSELQAGEPVKFGNSINVKHTSVSSKQL…	532	Viruses; Varidnaviria; Bamfordvirae; Nucleocytoviricota; Pokkesviricetes; Chitovirales; Poxviridae; Chordopoxvirinae; Orthopoxvirus
SMZ64733	SMZ64733.1		Putative DNA-binding protein [Cowpox virus]	Cowpox virus	MELCKIFVDKKIKNNVVIITLASATEIMAMFYAHAFGGYDENLHAFPGISSTVANDVRKYSVVSVYNKKYKIVKDKYMWCYSQVNKRYIGALLPMFECNDYLQIGDPIHDLEGNQISIVTYRHKNYYALSGIGYESLDVCLEGVGIHHHTLEAGNAVYGKVQHDYYTIKEKAKEMNSLSPGPIIDYHVWIGDCVCQVTAVDVHGKEIMRMRFKKGAVLPIPNLVKVKVGEENDTVNLSTSISALLNSGGGTIEVTSKEERVDYVLMKRLESIRHLWSVVYDHFDVVNGKERCYVHMHSSNQSPMLSTVKTNLYMKTMGACLQMDYMEALEYLSELKESGGRSPRPELQKFEYPDGVEDAGSIERFAEEFFSRSELQAGEPVNFCNSVNVKNTSVSSKQL…	532	Viruses; Varidnaviria; Bamfordvirae; Nucleocytoviricota; Pokkesviricetes; Chitovirales; Poxviridae; Chordopoxvirinae; Orthopoxvirus
SNB48651	SNB48651.1		CPXV197 protein [Cowpox virus]	Cowpox virus	MELCKIFVDKKIKNNLVIITLASATENMAMFYAHAFGGYDENLHAFPGISSTVANDVRKYSVVSVYNKKYKIVKNKYMWCYSQVNKRYIGALLPMFECNEYLQIGDPIHDLEGNQISIVTYRNKNYYALSGIGYESLDVCLEGVGIHHHTLEAGNAVYGKVQHDYYTIKEKAKEMNSLSPGPIIDYHVWIGDCVCQVTAVDVHGKEIMRMRFKRGAVLPIPNLVKVKVGEENDTVNLSTSISALLNSGGGTIEVTSKEERVDYVLMKRLESIRHLWSVVYDHFDVVNGKERCYVHMHSSNQSPMLSTVKTNLYMKTMGACLQMDYMEALEYLSELKESGGRSPRPELPEFEYPDGVEDAGSIERFAEEFFSRSELQAGEPVKFGNSINVKHTSVSSKQL…	532	Viruses; Varidnaviria; Bamfordvirae; Nucleocytoviricota; Pokkesviricetes; Chitovirales; Poxviridae; Chordopoxvirinae; Orthopoxvirus
SNB51826	SNB51826.1		CPXV197 protein [Cowpox virus]	Cowpox virus	MELCKIFVDKKIKNNVVIITLASATENMAMFYAHALGGYDENLHAFPGISSTVANDVRKYSVVSVYNNKYDIVKDKYMWCYSQVNKRYIGALLPMFECNEYLQIGDPIHDQEGNQISIVTYRHKNYYALSGIGYESLDLCLEGVGIHHHVLETGNAVYGKVQHDYSTIKEKAKEMSALSPGPIIDYHVWIGDCICQVTAVDVHGKEIMRMRFKRGAVLPIPNLVKVKVGEENDTVNLSTSISALLNSGGGTIEVTSKEERVDYVLMKRLESIRHLWSVVYDHFDVVNGEERCYVHMHSSNQSPMLSTVKTNLYMKTMGACLQMDSMEALEYLSELKESGGRSPRPELQKFEYPDGVEDAGSIERLAEEFFSRSELQAGESVKFGNSINVKSTSVSSKQL…	532	Viruses; Varidnaviria; Bamfordvirae; Nucleocytoviricota; Pokkesviricetes; Chitovirales; Poxviridae; Chordopoxvirinae; Orthopoxvirus
SPN68879	SPN68879.1		CPXV197 protein [Cowpox virus]	Cowpox virus	MELCKIFVDKKIKNNVVIITLASATENMAMFYAHALGGYDENLHAFPGISSTVANDVRKYSVVSVYNNKYDIVKDKYMWCYSQVNKRYIGALLPMFECNEYLQIGDPIHDQEGNQISIVTYRHKNYYALSGIGYESLDLCLEGVGIHHHVLETGNAVYGKVQHDYSTIKEKAKEMNSLSPGPIIDYHVWIGDCICQVTAVDVHGKEIMRMRFKRGAVLPIPNLVKVKVGEENDTVNLSSAISALLNSGGGTIEVTSKEERVDYVLMKRLESIRHLWSVVYDHFDVVNGEERCYVHMHSSNQSPMLSTVKTNLYMKTMGACLQMDSMEALEYLSELKESGGRSPRPELQKFEYPDGVEDAGSIERLAEEFFSRSELQAGESVKFGNSINVKSTSVSAKQL…	532	Viruses; Varidnaviria; Bamfordvirae; Nucleocytoviricota; Pokkesviricetes; Chitovirales; Poxviridae; Chordopoxvirinae; Orthopoxvirus
BBQ05092	BBQ05092.1		polyprotein, partial [Culex tritaeniorhynchus flavi-like virus]	Culex tritaeniorhynchus flavi-like virus	MAMIVEQCYRKIAKWQAKIKNSSEQIESYSDVKTREIANRRILFYQEKINSLVFAVNSSENTAVKTGNKNGVGLDRPFQFVDELANFDETTRRLPTYVPRWIGYMMVEHAYELESGMYFPGYCLDLPISFDWGEVEQPRKNGQLERLWEKMQEKRELLQMPVRHFNAVYGRMRVEAFKLRRNIFETRQERTKLGRSAKQQCRNCTIQDCEKCLYNTLYKKGVQLEVESTNKLLDIYTRFTKFINREVHNPIKPKPQTPMLGIWLRLKGYNELLKEFNVWVRSPDANRRKCNKKAREYIRECRLGIADYPGYYAYLDDGEVIVEEDQAKPKLIYDRSNKSSGKTFKVERRQRVDVEGITFWLAHTRSQRAVMLAAMDEKERLHTLENCAEVKKNHRDSID…	5750	Viruses; Riboviria; Orthornavirae; Kitrinoviricota; Flasuviricetes; Amarillovirales; Flaviviridae
YP_009179223	YP_009179223.1		polyprotein [Shuangao lacewing virus 2]	Shuangao lacewing virus 2	MEDIPIDPSFVKYCKGDSFCYVKRDAKGKLIIAPVHSLTPDDAAEMKNRSINYVDAFANVPFAPITPNVYVGARGGKMFNVCTNLKVLTGFDGIEVLVGTMRYITYPKNLVSGTPVFNQQGDLCSIVTSSDESDYALTGFDYVNSRFLCDKYEEKTATSNFIYGQRCFNDKASLLNYIKQVENNPPTMHWTVVNWTRLDGTLHTTYVNNLKQYSAVNWHLRPFWQAHSTPRRSRVIKAGVTAGVVAGEIANIEERLKILRIAAQDTEVQIRSSLRNQPTAQRVVRKPKVKQEKGYLEKTAEAVTEAVAIIVCMIFFLSIGVNAGAVDTAAKNVTIDVTMQFKQGIVLKTFCDALSFNLTPGDFADDYLSLAKSNELRGVFTNKLVKFEKDLRTGSIVSC…	5901	Viruses; Riboviria; unclassified Riboviria; unclassified ssRNA viruses; unclassified ssRNA positive-strand viruses
QBP37018	QBP37018.1		putative polyprotein [Lampyris noctiluca flavivirus 1]	Lampyris noctiluca flavivirus 1	MSACIEVYPHLKNAFRSQHANENIDDVLKRVDEEMNLLKTLKLIAPMIYEDVTFAVFHATEDPSDAGIHYSHAKLVSQFFERVEKTMPERRVKRKTIPSSKAAAVNEVLVRAKEKTPTMTATERRSVRVKMSEISKTRFRIAKLHENINAFGAIRAKKGCPQPECRRCKLGAERAGFEELLNIEWILLEQQRRQLDALLSGCKIPTIKVELAAGGESDKYIQSSHAVSISKWHELKGYYTWGEYILREAMTANQKRRANKHAAMYWNTGELPTESVVTTATNRFSVLGEEEVVFTPPIEDDSITVHNRTYIPRRHRKTEVEFDKALEEALNFYALGRRQRETTISALSAETKSKLSRAKTMKKAIEDRRDKLLADKLMSEYRKKDEIRAVKIPDTPKLN…	6152	Viruses; Riboviria; Orthornavirae; Kitrinoviricota; Flasuviricetes; Amarillovirales; Flaviviridae
YP_009388303	YP_009388303.1		polyprotein [Apis flavivirus]	Apis flavivirus	MEFIKSNFINSKTLAFIGDARGKRVFYPFGVAAANARQHFVPVVINGATWVCVMPYIARFRSAEFRAELAKKLFLANSPQEAYKIVGNFKYETYESRKKAMKAKKELQLKLKNENEARQRVANFERDYFPLILCARVTFSPEGYKKFIEKVALYAASLGLDHTAQSLYAGAEANRGRFAKEIKRVQRRLDEAQERAKINKKFNAWQRDLHRQFYRQAQKAHKGKFDGCGDVFVKKMVTPNDYKSFTKTMERFGVVATETLWQHFVAEDKDLARFLYNRRQAINEAVAKRREAKVKYLEERILRLKNRATRLAKNEQERLKRLQRKLDTRSRPTKPRALTLEAVATFKVAPKPAPQPPKVVEKPSRTELVARSRAARATTAYLRRPSVQREMLQCAKAHN…	6614	Viruses; Riboviria; Orthornavirae; Kitrinoviricota; Flasuviricetes; Amarillovirales; Flaviviridae
YP_009179220	YP_009179220.1		polyprotein [Xingshan cricket virus]	Xingshan cricket virus	MTTAFSADTGLLRHLGLINYGTWLETAQERRPALDEFMREFFRTLVSLTDTDFKDCSDMIQASAACLDELPSSSGAELLVDEFLSEFVEVERKEVPRSAPASVDDISAVRKSLVVPGRRDNFDEVIINIAAFESCLEDKQSPMLVTNHPKLALSEKSSAARLIKSAARLNKNALTVCLTHNALTTSANEMGHAKVGDCSHCNILKKVYACRARARGLLRERNAKVNNALALYESCNRRELGTFTPLNTGEYLALGGYRQVQEGETSVYNRVHLDKSTRNRHRVALSQASGHYANKYNVLAKYHIDDSWGEDVVFKKSTKVKGMQSRSGEPSTHFTAFVKKRSRVETPSNNFWNDSKVYRDLREPPMMARVNYGVVNEVVVKKTTQRVDTDNLVPSGDDA…	7070	Viruses; Riboviria; unclassified Riboviria; unclassified ssRNA viruses; unclassified ssRNA positive-strand viruses
BBV14763	BBV14763.1		polyprotein [Barley aphid RNA virus 10]	Barley aphid RNA virus 10	MNSVRASNTPGRLVVSGGVLYKICSWDVEPPTKAARPFLALPRKTVSNEAAYRNAVKPAFEKKKSVAASSKRQAQVSQRIARARAAKVNQGLAKEIERFEEIKPFLGCNAIIAPKVTSHKEVTPPPSPKRERRYRESDYRPLVAAALAQPKIELKSIWGSGDAVTKLELGPETEFTERPKPTRPKPVRVLAKPAVPSDEKVLDEFKVTSTSGGTLTIRLADFRIACRNADEPVAVASSRDLNSTRNGRWAPLTYLYEELNYPRPTVMDYANSHVTIQGEGGKTVYTVMTKEVATASDNLDGLYRGLRQLKTVMDIHGDKPVSMPFMCVTQKGIQVRQLVNGVIDILVHEGKNITMYTDYRGVFYTAKAVLKETQKTVDEHATDESTPQDWQPVEGDKHH…	7081	Viruses; Riboviria; unclassified Riboviria
YP_009179218	YP_009179218.1		polyprotein [Sanxia water strider virus 6]	Sanxia water strider virus 6	MQFVRSNIKLSEVYTSFASNIVKSDDVSTFTDINGLKVKAQEVDKIPVEIRFIHLDQIYGWKPTGFEKTYLKNLVDNPELTTEAEFANTTLNLRTGRLSVFESPLQAVPAKHILSCTPNTSRCIKKLSSKATLTVPSIMATYNQLMSGNTITVNRVPLDTMPSTVNNGEMQIIAQKPIRRFVPDYYYDPKYVPSTSKDKVLLYANLMGVPYGQIRNIIDRFFNLSEAEILEKFNSPINKRHFLNNRLQWTTALYEANFDNKQALVCLEAYKTMKYKPQNFVNQAKRLLRNINEYGTLAKSGKMLYDITHPKKIVINVDNESSRLEPTNFPNITFNKERTTPELEKPQPKRQRVTLKGKFVPMAKQPDMTNLFFREDKFYVQHRLMNPAPIVKLITKRRA…	7312	Viruses; Riboviria; unclassified Riboviria; unclassified ssRNA viruses; unclassified ssRNA positive-strand viruses
YP_009175071	YP_009175071.1	MeV-1	polyprotein [Macrosiphum euphorbiae virus 1]	Macrosiphum euphorbiae virus 1	MSGAWSLVKRAVKAPKPAPKKGKFGTSFNRGTIAAGLAAWGTECSLKVVKTAKPAPAPVAPWATEKHRAALAARRAATAAKTAALPAAAVVAVKAKRTTKRVVKKEVDPAPPSPITTAQKAVKRVRRPAQNNIPDSIRKAVAKATKPVPFGATFAGISGTPSSHVEEPNVELAPANAPAEKVSPGLFIVLEGDVRDTLLRQEYVFAHCTSRDWAEPKRSSAGVAKVVLEASGFDKPMPLDLVDDTSVTHQQSGDKHLYTLLTKEEYCGKPTYGSFTNAVTSLRRSLLVEKLSEVTMPLIGCGRDRLPLEFVLFTIREELVNYGINVCIIDNDTPMVDATRNIVRAQRKRKVDSKWTHALQNGLREFTERVAQPYEPERKLARRLYTNDRVLAEYTCSSQ…	7333	Viruses; Riboviria; Orthornavirae; Kitrinoviricota; Flasuviricetes; Amarillovirales; Flaviviridae
BAM78287	BAM78287.1		hypothetical polyprotein [Gentian Kobu-sho-associated virus]	Gentian Kobu-sho-associated virus	MVRSRTVRAYAPAAVTAGGDPQWKVVSRPAARKTVHVPGIAGWYYVVLATLLRGIRKESHYKVVKGLDSDGEFTINTAAAAEQRGYYNALRKEEKTERRRAAAQRDWFNVPNAVESFFDSKLYHKLMRAAGLADMAGAWKAFRNTPEVAQLVKTKKAAMSTAAAAEKANRLAYKKRVLACLGKDGKKKAKNFILGDDKTKETSEWFFSLCSTTRIVLAAYWPAKVVKARAHKRAAAAAAAAKVAAFEKKWGTGEEGRAKQAIAKARYEYFQTAEGLEELFVRDQRRQAAEERKEKFVAKYGEGEEGKAKHAEAKAAWETRTKKREAISASIKEGTARMVVRPDGRKKIVLPPSFGVAALAKPVPFEGPTAAKLAVPTGACRPLPSKPTTITAPETDGFW…	7391	Viruses; Riboviria; dsRNA viruses
BBE27868	BBE27868.1		hypothetical polyprotein [Gentian Kobu-sho-associated virus]	Gentian Kobu-sho-associated virus	MVRSRTVRAYAPAAVIAGGDPQWKVVSRPAARKTVHVSGIAGWYYVVLATLLRGIRKESHYKVVKGLDSDGEFTINTAAAAEQRGYYDTLRKEEKTERRRAAAQRDWFNVPNAVESFFDSKLYHKLMRAAGLADMVGAWKVFRNTPEVAQLVKSKKAAMSTAAAAEKADRLAYKKRVLACLGKDGKKKAKNFILGDDKTKETSEWFSSLCSTTRIVLTAYWPAKVVKARAHKRAATAAAAAKVAAFEKKWGTGEEGRAKQAIAKARYEYFQTAEGLEELFVRDQRRQAAEERKEKFVAKYGEGEEGKAKHAEAKAAWETRTQRKEAISASIKDGTARVVVRPDGRKKIVLPPAFGAAALAKPVPAKGTAAARLAVPAGACAPLPPKPITTTTPETAGFW…	7391	Viruses; Riboviria; dsRNA viruses
YP_007438864	YP_007438864.1		hypothetical polyprotein [Gentian Kobu-sho-associated virus]	Gentian Kobu-sho-associated virus	MVRSRTVRAYAPAAVTAGGDPQWRVVSRPAARKTVHVSGIAGWYYVVLATLLRGIRKESHYKVVEGLDSDGEFTINTAAAAEQRGXYDTLRKEEKTERRRAAAQRDWFNVPNAVESFFDSKLYHKLMRAAGLADMVGAWKAFRSTPEVAQLVKTRKAAMSTAAAAEKADRLAYKKRVLACLGKDGKKKAKNFILGDDKTQETSEWFSSLCSTTRIVLAAYWPAKVVKARAXKRAATAAAAAKVAAFEKKWGTGEEGRAKQAIAKARYEYFQTAEGLEELFVRDQRRQAAEERKEKFVAKYGEGEEGKAKHAEAKAAWETRTKRREAISASIKDGTARTVIRPDGKKKIVFAPSFGAAALAKPVPVKGPAAAKLAVPAGACAPLPPKPITTTTPETVGFW…	7391	Viruses; Riboviria; dsRNA viruses
YP_009179224	YP_009179224.1		polyprotein [Gamboa mosquito virus]	Gamboa mosquito virus	MARQREATRANLLVRVVTMLGNLVIDPLADLDPTHPDILTARDIREMMRNRRLYGKRRLGLYPFQGGFMLLRKKMTAWTTAEMETISSQPLTTANKIIVGKAKKEEPAWKELKKIRLQEILEARDKQKKCRHFAPLIRLDGFLAHESDINAAGITRNDIRRFSSLNPGSVDFGVKRLKEERRHGKILTEGRGARKDFHAEIRNFLKVNFNFKNTARTAFLKAGGKPEGFKDTRFRAHLMAKTTCTHHSWFTVAYSYVKKNNGRLADLEFRSVFGSEAGAEAAAQAEQKRRSDAKAKWEATNAARALAAQRREENRGYGNWIMNQGLFAARQMFGREEFNNRQAARDARRQERWQENQTLFSVKTLINRSEFEARRAAFQAREQRRKERWTENQAMFGMV…	8572	Viruses; Riboviria; unclassified Riboviria; unclassified ssRNA viruses; unclassified ssRNA positive-strand viruses

## Sheet: Figure 1 Biochemical Screen
Construct Number	Abbreviation	Insert Description	Genome Origin	Genome Accession	Gene Name	Protein Accession	Construct Boundaries	Virus/Host Origin	Notes	Sequence
1	VACV	Vaccinia virus B2R (aka VACWR184, poxin) protein, H17A Catalytic Mutant	Vaccinia virus, complete genome	NC_006998.1	hypothetical protein VACWR184	YP_233066.1	M1-R219 (full length)	Mammalian Poxvirus	H17A Catalytic Mutant Negative Control	MAMFYAHALGGYDENLAAFPGISSTVANDVRKYSVVSVYNNKYDIVKDKYMWCYSQVNKRYIGALLPMFECNEYLQIGDPIHDQEGNQISIITYRHKNYYALSGIGYESLDLCLEGVGIHHHVLETGNAVYGKVQHDYSTIKEKAKEMNALSPGPIIDYHVWIGDCICQVTAVDVHGKEIMRMRFKKGAVLPIPNLVKVKLGENDTENLSSTISAAPSR
2	VACV	Vaccinia virus B2R (aka VACWR184, poxin) protein	Vaccinia virus, complete genome	NC_006998.1	hypothetical protein VACWR184	YP_233066.1	M1-R219 (full length)	Mammalian Poxvirus	X-ray crystal structure previously determined for this protein (Eaglesham et al., 2019)	MAMFYAHALGGYDENLHAFPGISSTVANDVRKYSVVSVYNNKYDIVKDKYMWCYSQVNKRYIGALLPMFECNEYLQIGDPIHDQEGNQISIITYRHKNYYALSGIGYESLDLCLEGVGIHHHVLETGNAVYGKVQHDYSTIKEKAKEMNALSPGPIIDYHVWIGDCICQVTAVDVHGKEIMRMRFKKGAVLPIPNLVKVKLGENDTENLSSTISAAPSR
3	MPXV	Monkeypox virus poxin-slfn fusion	Monkeypox Congo_2003_358	DQ011154.1	Unknown	AAY97169.1	M1-F503 (full length)	Mammalian Poxvirus	Toxic, cannot be expressed.	MFYAHAFGGYDENLHAFPGISSTVANDVRKYSVVSVYNKKYNIVKNKYMWCNSQVNKRYIGALLPMFECNEYLQIGDPIHDLEGNQISIVTYRHKNYYALSGIGYESLDLCLEGVGIHHHVLETGNAVYGKVQHEYSTIKEKAKEMNALKPGPIIDYHVWIGDCVCQVTTVDVHGKEIMRMRFKRGAVLPIPNLVKVKVGEENDTINLSTSISALLNSGGGTIEVTSKEERVDYVLMKRLESIHHLWSVVYDHLNVVNGEERCYIHMHSSHQSPMLSTVKTNLYMKTMGACLQMDSMEALEYLSELKESGGRSPRPELQKFEYPDGVKDTESIERLAEEFFNRSELQAGESVKFGNSINVKHTSVSAKQLRTRIRQQLPSILSSFANTKGGYLFIGVDN…
4	CPXV	Cowpox virus poxin-slfn fusion	Cowpox virus strain Brighton Red	NC_003663.2	CPXV197	NP_619978.1	M1-F505 (full length)	Mammalian Poxvirus		MAMFYAHAFGGYDENLHAFPGISSTVANDVRKYSVVSVYNNKYDIVKDKYMWCYSYVNKRYIGALLPMFECNEYLQIGDPIHDLEGNQISIVTYRHKNYYALSGIGYESLDLCLEGVGIHHHTLEAGNAVYGKVQHDYSTIKEKAKEMNSLSPGPIIDYHVWIGDCVCQVTAVDVHGKEIMRMRFKKGAVLPIPNLVKVKLGEENDTVNLSTSISALLNSGGGTIEVTSKEERVDYVLMKRLESIRHLWSVVYDHFDVVNGKERCYVHMHSSNQSPMLSTVKTNLYMKTMGACLQMDYMEALEYLSELKESGGRSPRPELPEFEYPDGVEDAGSIERLAEEFFSRSELQADEPVNFCNSINVKHTSVSAKQLRTRIRQQLPSILSSFANTDGGYLFIGV…
5	AKHV	Akhmeta virus poxin-schlafen fusion	Akhmeta virus isolate Akhmeta_2013-88	MH607141.1	schlafen-like protein	AXN74977.1	M1-F503 (full length)	Mammalian Poxvirus		MAMFYAHALGGYDENLHAFPGISSTVANDVRKYSVVSVYNNKYDIVKDKYMWCYSQVNKRYIGALLPMFECNEYLQIGVPIHDQEGNQISIITYRHKNYYALSGIGYESLDLCLEGVGIQHHTLEEGNAVYGRVQHDYSIIKDIAKEMNSARPGPIIDYHVWIGDCICQVTAVDVHGKEIMRMRFKKGAVLQIPNLVKVKLGENDTENLSTTISALLNSGGGTIEVTSQEDQVKHVLMKRLESIRRMRSVAYDHFDIVNGKECCYIHMYSSNQNGMPSTVKTNLYMKTMSACIQMDSITALSYLDDLKESGGRCPPELPDIDYEDDEDIEDETTNARLAEEFFNRSELLLGEGFNFNRSINVKVTSISAKNLKPRIKQQLPSIISSFANTDGGYLFIGL…
6	VPXV	Volepox virus poxin-slfn fusion protein	Volepox virus strain CA	NC_031033.1	schlafen	YP_009281928.1	M1-K509 (full length)	Mammalian Poxvirus		MAVFNSHFLGGYDENLHSFPGLSSTVANDVRNHSSISVYKAKFNIVKDKYMWCYSYVKNRYIGALLPMFECNEYLQIGDPIYDTEGKQISIVTYRHKQYYALSGIGYESLDVSLDGIGIHHHILEEGKAVYGSVQRDYDAIKELAKEMKYIESGPIVDYHIWIGESICQITAVDENRKEVMRVRFKKGAVLQIPNTIRLLLGKNDNENLFSAVSALLNSGGGTIEVRIPECRRMHYTVMKRLEDMREWISIHDHIEIVDGNECCYVHVYSSNREQHRFPSTRKTNLFIRTMTSSIQMNYHSAMEFLTYLSETGGRSPKPELSEHYHQDKDVIEDEHSIERLADELFNRASLQLNETFNFTRSVNVKVTASSGKQLRTRLKQQLPSTVASFANTDGGYLF…
7	RPXV	Raccoon poxvirus poxin-slfn fusion protein	Raccoonpox virus, complete genome	NC_027213.1	Schlafen-like protein	YP_009143488.1	M1-D506 (full length)	Mammalian Poxvirus		MAVFKPHSLGGYDENLHSFPGLSSTVANDVRNHSSIVVFGAKYDIIKDKYIWCFSYVKNRYIGALLPMFECKDHLQIGDPIYDTEGSQISIVTYRHKQYYALSGIGYESLDLSLDGIGVHHHILEEGKAVYGKIQRDYTAIKELAKEMNSIEAGPIVDYHIWIGESICQITAVDENGKEVMRVRFKKGAVLQIPNTIRVQLGQNDNENLFSAISALLNSGGGVIEVTIPECDNPQYTLMKRIVAIREWIHVHDHIDIIDRNERCYMRVYACNEKYRFPSTRKTNLYIRTMISSIQINYYAAMNFLCELKETGGRSPRLIPKIEYRDQVEDEGLIEILADELFSRASLQANESFNFTRSTNVKVTSISGKQLRTRLRQQLPSTIASFANTEGGFLFIGLD…
8	MSEV	Melanopus sanguinipes entomopoxvirus poxin homolog	M. sanguinipes entomopoxvirus	NC_001993.1	MSV237	NP_048308.1	M1-Y192 (full length)	Entomopoxvirus	Toxic, cannot be expressed.	MFISHHLGGYNESLHAFPDLSTDKVIDVTKYSKIYVDDNMYIISGLMWIFSKIENRYIGGLVPYFVCNDILEGGSLITDENNTAISCVTMKKDNMYALSGLAYETFDQNINVPIYHHELENGHSVYGSIQGKYEIIKEYAKSFKQSSHNSISEYHIWVGEKLIQITSINNDKKEIFRFRIKKGGILADEYVI
9	SOPV	Sea otter poxvirus poxin homolog	Sea otter poxvirus strain ELK	NC_037656.1	schlafen-like protein	YP_009480542.1	M1-K220 (full length)	Mammalian Poxvirus		MISKYKNKHDIIIMTNTEKKFYPHFLRNSHHENLYSFPCIYANKAIDVTKFKDVVVNNKKYSVSDDCIWSYSYVGHRYYGGFLPYFTISDTDIKPKVGTIIYNTDGDEISCVTDSVGNMHTISGIGYDALDVDTSGIDVHHCIVEDGNCVYGIKQDKDYIIKQYADKKNSLSNTAITSLNVWFCKKSTQLTATYSNGKEAMRIRIKRCGILTGDYYEVDK
10	PTPV	Pteropox virus poxin protein	Pteropox virus strain Australia	NC_030656.1	Schlafen Protein	YP_009268718.1	M1-S194 (full length)	Mammalian Poxvirus	Despite the name, contains no schlafen domain	MAAAKFLPHLDADAAVNKLHCFPGLSSNKAVDVTQFSHVVVNGCRYETHRYMWVSSTIGERYIGGFLPYILIEGANKPEVGDLIYSEDGEPISCITRSKGDAFCVSGIGYETLDLQSNVRVHHRTIVDKHSVYGGQQGPYCVIKQYALEKAARSSGSVTDYYVWIGDNITHIVGTCANGKEVSRVRIKHGGIFS
11	ACEV	Anomala cuprea entomopoxvirus poxin homolog	Anomala cuprea Entomopoxvirus	NC_023426.1	Nucleopolyhedrovirus p26 protein	YP_009001652.1	M1-T218 (full length)	Entomopoxvirus	Codon optimized. Toxic, cannot be expressed.	MDIISWGLYNNKYVTIDNYYIKPIHFSDKNSINKYYQFPNLITEKLLSKNIYDHKKIMIIDDNANILNFNVNDSVLTYHKFNHSIIGGILPGFKYEKFIYPGTPIFDSNTGELISIITINYKYKNYYIYPISGPGKSSWNIKFKGFDPKIYYVELSKTQSEYIKDETKNNTYMDDKYFDIVITINRFDNIVNLIKVQSNGYELERMRFECNENIKVIT
12	G. fumiferanae	Glypta fumiferanae wasp poxin homolog	Glypta fumiferanae p26 locus with putative transposon	KP706795.1	IV structural protein P26	AKD28026.1	M1-F268 (full length)	Ichneumonoidea		MAEGFEFAGVQFTFNNGNKTAKVFRHRDLPVDVHILPANTNEITRAARAHLRPETSLHQFPAVATSYIFPAVVAGENIKVIRNDGTALQAALTTTRVLFHAYGRRLIWSQLLAFVVETRDEADSIYQGSPIFRASDNAFVSVITHREQMFLETSSGEKIFSGYVFPVTGLKPKNFVSGETEIYPGGSFVVRKIEDGMSVYGMQMLPYAEIKAFAQSIQFVPSCNLPRNTAVYHNRFETNVRPRRRQTRNFQVPRVLSAVKNLLTCPRF
13	M. demolitor	Microplitis demolitor wasp poxin protein	Microplitis demolitor strain Queensland-Clemson	NW_014463936.1	uncharacterized protein LOC103575071	XP_008552911.1	Q27-Q307	Ichneumonoidea	Removed signal peptide based on signalP prediction.	QQLPTVYNSGQYNNITFEYNHEDKVINTKTVNGKSVDIVILPINKMVPVDFMPSKNLDKLHQFPVIASSITLFGPSHNEPIEILTIKKQQTAAASDGDEMTTYKTRVYSNASSDRIMYHGYNRRLVWSQLMGVVLKKEVADTIYKGAPVFSSNTKKIISFITAREEYTTEDGEELVLFPLTAIKPKGYSSGQSLHESTEDILQYDTQGKFSVYGRRMMPYTELKAYIETVVTPENIQNSRTKKHESVVFYGKNDVTLTCVQGDVEIARTRIACNLIKPAVQ
14	LdNPV	Lymantria dispar p26 (poxin) homolog	Lymantria dispar multiple nucleopolyhedrovirus strain 3029	KM386655.1	P26	AIX47878.1	M20-I252	Alphabaculovirus	Removed signal paptide based on signalP prediction	ETGSGRVYSVDYVVRPSRRTVDVTSVDGRKITVKVVPPHRWDDEDDAAAELAYRYPGAASDAPFEAARVGQKLQVLLDNHTLIDAVAATDEYVFHHTRRRRSVVGKLAAFALNDFALAARVWPGAPIFRRGRFVSVVSGRYQDYANDRVLFPVTGASAQMVEVAHDRDRLSVSSSARPPARAAGDGREFRDWPRVATLFCDAPRRRVALALTEGEFEIARFALVGLLADFEHI
15	CiNPV-A	Chrysodeixis includens nucleopolyhedrovirus p26a (poxin)	Pseudoplusia includens SNPV isolate IF	KU669293.1	p26a	AOL57023.1	T22-E283	Alphabaculovirus	Removed signal peptide based on signalP prediction. One of two poxins in this genome.	TQTTRTVTTKSKFNVEYSVDENEKKIRVVAVDGKTVRIETVRPHSDTNDIKTADDQLPLSALHHFPGAVSEIVFPAIDNSNDSLMVLLNDGILLKVEPTHVYTNFHKHDNRLIYGQLRTFAVDDLWIAEKIYIGAPIFFNNRLVSVVTCRYDDYDAGIVLFPVSGIRPKGLVSGQINYDSNVYVNSLRNEMSVYGKRQMAYSSPYMSVKKFALSTAANRLTYRDLPRNVAIFHNKKEITISLVEGEYEITRIRFDGPLIVPE
16	SfNPV-A	Spodoptera frugiperda nucleopolyhedrovirus p26b (poxin) homolog	Spodoptera frugiperda MNPV virus	NC_009011.2	p26b	YP_001036423.1	T21-K279	Alphabaculovirus	Signal peptide removed based on signalP prediction. One of two poxin homologs tested from this genome	TSPLSTMATFNVKYTVDHETKRINVNSVLDAPVSIHVIPPNSDTNGDEKLTLLHQFPGVATNVIFPSITKDDDLYVQLNNGVLYKTRATRVYTNFHTHKNRMVYGQLYTIAVDDFEIANKIYIGAPIYRNKQLVSVITCRFDDYEAGLVMYPVTGIRPQGLISGQIQYDDRVGVETLRPSMSVYGRQQLPYKSAHMSVKQFAMTADMNRQLYRDLPRSVMLFHNNKEITITVVEGEFEMYRIRLDGPLVTNQESSNEEK
17	CrNPV-A	Choristoneura rosaceana nucleopolyhedrovirus p26a (poxin)	Choristoneura rosaceana alphabaculovirus	NC_021924.1	P26A	YP_008378498.1	V19-Q267	Alphabaculovirus	Removed signal peptide based on signalP prediction. One of two poxins homologs tested from this genome	VKVTTINNVLYTVNDTQKTIAVKQVDDKPAFIQVIPPQSFTKNQEELDMLHHFPGVASNVMFPRIANNTKLTVLLNDGSLATITVDRVYTNFHSHKNRMIYGQLYSFALSNFSLANQIYIGAPIFEKERMVSVITARHEDYKNKLVIYPVTGISARGLVSGQINFDLQILTQKLLEGSSVYGKMQLPYKALKDYAISTNRNKNLFKCLPRNVAVFHNERDITIALVEGEFEIDRIRLSGPLILRNNIQQ
18	BmNPV	Bombyx mori nucleopolyhedrovirus p26 (poxin) protein	Bombyx mori NPV	NC_001962.1	P26	NP_047534.1	M1-S240 (full length)	Alphabaculovirus		MELYNIKYAIDPTNKIVIEQVDNVDAFVHILEPGQEVFDETLSRYHQFPGVVSSIIFTQLVLNTIISVLSEDGSLLPLKLENTCFNFHVCNKRFVFGNLPAAIVNNETKQKLRIGSPIFAGEKLVSVVTTFHRVGENEWLLPVTGIQEASRLSGHIKVPNGVRVEKLRPNMSVYGTVQLPYDKIKRHALEQENKTPNALESCVLFYRDSEIRITYNRGDYEIMHLRMPGPLIQPNTIYYS
19	AcNPV	Autographa californica nucleopolyhedrovirus p26 gene (poxin)	Autographa californica nucleopolyhedrovirus	NC_001623.1	ACNVgp137	NP_054166.1	M1-S240 (full length)	Alphabaculovirus	X-ray crystal structure determined for this protein	MELYNIKYAIDPTNKIVIEQVDNVDAFVHILEPGQEVFDETLSQYHQFPGVVSSIIFPQLVLNTIISVLSEDGSLLTLKLENTCFNFHVCNKRFVFGNLPAAVVNNETKQKLRIGAPIFAGKKLVSVVTAFHRVGENEWLLPVTGIREASQLSGHMKVLNGVRVEKWRPNMSVYGTVQLPYDKIKQHALEQENKTPNALESCVLFYKDSEIRITYNKGDYEIMHLRMPGPLIQPNTIYYS
20	CrNPV-B	Choristoneura rosaceana nucleopolyhedrovirus p26b (poxin)	Choristoneura rosaceana alphabaculovirus	NC_021924.1	P26B	YP_008378375.1	M1-K233 (full length)	Alphabaculovirus	One of two poxin homologs tested from this genome	MYIKMDVIFDEDSGCLQIGDQNVFIKVLEPGQEVFDETLNQYHQFPGVITSVVFPQLSMGTTVDVFTTIGTYSGTLVTTCFNYHVCNKRFVFGTVPALEVADDMRNHLHVGAPITCDDRLVSVVTTVFRRADGVWLLPVTGVRQSGQVSGHAYVRNGVRVERLSAGRSVYGAVQLPYDKLKTHALSQTAPQAEGSESCALFYNDSEVRITFNKGSFELMHWRLPGPFAGHSVK
21	SfNPV-B	Spodoptera frugiperda nucleopolyhedrovirus p26a (poxin) homolog	Spodoptera frugiperda MNPV virus	NC_009011.2	p26a	YP_001036378.1	M1-L252 (full length)	Alphabaculovirus	One of two poxin homologs tested from this genome	MSLRINSVATENVAAAAGAANVSTIEYIKSITYCVNHMTRRVYVLSEKNCAVRIHVFGQHDTSADFENIKYHYPGVASDVKFLKLKRNSYVNILLFNANNKPYLRRMRIQDRMYYTHHHYAKYYVYGQVPAIMQKNNLAEFMSQLYVSAPIFDDNGTLISVVTDYYVNDENHCIVPIAGDAGGAQGTVCLDGFVYVTDPNDHLTFHTFQILPRIDVYVTFDKKNVYINVVYNGEPISKLRVKTQFAGNVLIL
22	TnNPV-B	T. ni nucleopolyhedrovirus poxin homolog	Trichoplusia ni SNPV	NC_007383.1	ORF59	YP_308949.1	M1-R239 (full length)	Alphabaculovirus		MSIQTGETVESNVVTQFNSVAFLVNHETRRVTIMSYKNEPVKFHVFNQHDTDPDLLKLPYHYPGLASSIELPKITHMRKVRIMVFDQRHRMLLAEEFLLEKLYFVHHHYAKYYVYGLVPVVAKNFKHNLYSGAPVFDETGKVLLSVISDCYFSSTTEENCVIPLSGELSGSRGVLCLDGHVWLNETGDDFTFDKTNVPNRIDLYVSHNKKFVYLNIFYNNNIINFIRVKAKFVGNVLIR
23	LfNPV	Lambdina fiscellaria p26 (poxin) homolog with N-terminal Radical SAM domain	Lambdina fiscellaria nucleopolyhedrovirus isolate GR15	NC_026922.1	P26	YP_009133287.1	M1-C397 (full Length)	Alphabaculovirus	Contains extra N-terminal extension	MTSATMYFDEFASGASMNINDDDNALNTKNDKTPSSASIDINVKTPFQACSDNCFYCDLCYCKEGQHSQKPLSSQLKVFENEQKLLQKQPSLSLLSSSSVTKYSQNDANVYSVAENNVEELCVVGDSRSAPHGIEDNLQRRDDGVRVFEIKNVRFAVNFTLKQVFAHAYKGNSINVHVVSHRDVCVAPSAVHVYPGVLSQFKLPELKAASCVQVVRFNANNEMYVSVERLDTKLYYVHHHRNNDYVYGLVPAIRCVSFENARTAFLGAPIFDSRNNLVSFVTNHYMDVYHDGGCVLPVVGKSSRLFSSMRITGAVQVRYEDNNRLELPTSALSGAHTTATKNEIKIAQKQLQKQQQQLVDLNVSVRRKRINLFLIHNGRVLMHTNIKSLFAGSMLYC
24	EoNPV-B	Ectropis obliqua nucleopolyhedrovirus p26a (poxin)	Ecotropis obliqua NPV	NC_008586.1	p26-b	YP_874245.1	M1-V222 (full length)	Alphabaculovirus	One of two poxin homologs tested from this genome	MYINVKNVMCKVDFVQKRVNCESYNGVPLLVHIFKQYDASAEWQNLHQYPGLASSMVLPKIAASSCVQIVKFDVGTTGFTTTIHALDVKLYYVHHRYGKHFVYGLVPAIVSLQNDLELYTGAPIFNNKNNLISFVTDSFLSDINELIVPVTSESHRMQGMFCVTGCVKVFSKDDDIVDLNNGHINIFVKQWPKYVEIFVMYNGFTMSYVKLVCKFAANVLIV
25	P. rapae	Pieris rapae (cabbage white) poxin homolog	Pieris rapae unplaced genomic scaffold	NW_019093435.1	uncharacterized protein LOC110997070 isoform X1	XP_022120734.1	S17-L279	Lepidoptera	Signal peptide removed based on signalP prediction	SEDFHILSHTEPLSPRSVQNKSDDMSQRTVLNEQYKGLVERMSVPVELHEREGRRYATCASLVPIHCCTTEQKAELSVSTHHYCDVFTEQVLAHLAELAYVRLDADTAEKVFLNRTKRILLVSSDGKLAQWRCAPTFESANNYIAGAPIVNKDGSIVSIVTAKRGNHYAVSNAEGEGGYFETSKPWEIIDTGDAKFVYADKTFSTREELRAYINSLPPASLASPPRPLLIRGNSPRVALVAENGRQLVHIYLSGVLVNDVQYL
26	B. mori	Bombyx mori HDD13 homolog (poxin)	Bombyx mori strain p50T (=Dazao)	NW_004582011.1	uncharacterized protein LOC101743840	XP_021205460.1	M1-L255 (full length)	Lepidoptera		MTGIVELDLRMLKKKTAMSKRTVLNENYKGIVESMSIPAEIHERNGKKYASVGSILPIHCCPPEELERRAESTHHYCGVFTDELLAPLEELAYVRLDENTAEKVFINRAKRILIVSSDGHLAQWRCAPTFESANRYIAGTPIVDQRGGVISVVVAKKNNHYAVSSFEGEGGYFESTQNWKVVEPAAGGYAYGELTFPSRTALREHVAGLRGGAGAWGDAVPVLRGGTSPRLALVLDGRQLAHYYLHNVIVDVEYL
27	P. xuthus	Papilio xuthus (asian swallowtail) poxin homolog	Papilio xuthus isolate ya'a_city_454_Px	KQ459582.1	hypothetical protein RR46_10285	KPI98967.1	M1-L266	Lepidoptera		MPQIRCRHQVHDVGLASFLHQLYTTMSKRTVLNEIYKGLVESICIPAELHHKNGKRYASFGTVVPIHCCTPEEVKERVNNTHHYCDVFAEELLAPLGELAFVRLDENTAEKVFINRSKRVLIVSSDGRLAQWRCAPTFESANHYIAGTPIVNKEGALVSVVTAKRGNHYAVSNFEGEGGYFETTLPWEMVHPMQGEVIYGDQTFSSRDELRKHLANLSPAEVTSDLPVRPVLLTGVTPRITLITHNGRQLAHYYLYGVHASDVQYL
28	H. armigera	Cotton bollworm moth HDD13 (poxin) homolog	Helicoverpa armigera isolate Harm_GR_Male_#8	NW_018395589.1	uncharacterized protein LOC110378694	XP_021193734.1	A19-L273	Lepidoptera	Removed signal peptide based on signalP prediction.	ANLNARMSQRTGFPTSNGPAGLTYRGLVERMAIPAELHRRADGRQYASFGDARPIHCCTPEQVEKLSQTTHHYCDIFTEQLLAPLGELGYVRIDENTAEKVFINRSKRLLVVSSDGVLAQWRLAPTFESANLYVAGTPVVNQAGELVSLVTAKRGNHYAVSTFEGEGGYFDTSEAWQVRDIPEGRGVYGDRTFPSRDELRAYVSSLPPIDAPPTGPPTPILWRGATPRLVLLAKNGRQISHQYLHGVSADNIEYL
29	T. ni	Trichoplusia ni (cabbage looper) HDD13 (poxin) homolog	Trichoplusia ni isolate ovarian cell line Hi5 chromosome 1	NC_039478.1	uncharacterized protein LOC113495595 isoform X1	XP_026730193.1	R23-L265	Lepidoptera	X-ray crystal structure determined for this protein. Signal peptide removed based on signalP prediction. Codon optimized.	RYIMGRTVLNESNKGLVENFSIPAELHERDGKRFASFGTTVPIHCCTPEQVAEFANKTHHYCDVFTEQVLAPLDELVYVRIDENTAEKVFINRSKRILLVSSDGVLAQWRSAPTFESSNRFLAGTPIVNKDGDLVSVVTARKGNHYAVSTFEGEGGYFETSQPWKVLDPPEGAAVYGDRWFPSREEVRAYTLSLPGAAVSAGSPPAPVLHRGGSGRLVLADARGRQLSHHYLHGVATTDVQYL
30	D. plexippus	Monarch butterfly HDD13 (poxin) homolog	Danaus plexippus plexippus isolate F-2	KZ248545.1	immune-related HDD13	OWR54847.1	M1-L241 (full length)	Lepidoptera	X-ray crystal structure determined for this protein	MMKSTALNEKYYGLVENVTIPASLHEYNGKPYSKVGNAMPIHCATQEEKELLSRTTHHYCDLFTDKLFAPLEELVFVRLDENKAEKVFLNRHKRLFLTSSDGVVASWRCAPTLESLNKFMAGTPLVGRDGRVVSLLTAKHGNHYAVSHLEGDGGYFETSKPWEIKDMEDGRLYYGNKSFNSRDELRAYIQNLPPLEVDSSAPPQPILLRGKNPRIILVAENGRQISHQYISSNLITDVEYL
31	DpCV 22	Dendrolimus punctatus cypovirus 22 poxin	Dendrolimus punctatus cypovirus 22 isolate Macheng segment 14	NC_025842.1	hypothetical protein	YP_009111323.1	M1-V288 (full length)	Cypovirus		MDATLNLHLLVETIHHLTYLANQSTNQETTRVLEQYKQSVIDDLASKIVNDELIIPEKPTSAEKPMSVDDLAAPPGEDVPDIVLATDENSYVKRTHHHYAGFYSKNILPPICRDRAVDVNGKTYKLYDSMKTLNVQSSGNDTILTIEPIIFTPDELPKGAVVTNYGTNETVSLITSSYDTQHVNGHKGYPVNDGFKNINIHLAAPVEHVQKTKPIAYADKQFDTKAELIEYLKTVKPLPKIKAHLYTDKHNRGSQLIIHYDGVNIANIHLRARVVGNVIADCEYAPDV
32	IiCV 2	Inachis io cypovirus 2 poxin homolog	Inachis io cypovirus 2 segment 8	NC_023494.1	hypothetical protein	YP_009002595.1	M1-N274	Cypovirus		MQRMQLVNKQNLINYIAHSIIEEGLVDDVEAGASKNHLPKMPNPSDIEKAKLNPYHEVKDETRKDDIKENLVLATNETAFLAKTRHHYTGFYSKHILKPVPSDGIVMVNDTPYKTGSVKKVANAQKNGESTIITFEPCLFTTDNLPAGSIVKDAEGGEYGMITSHYEAFNKRKAYPIQNAFEYPSIMVSVPCEHRVKEKLMAYADKQFDKKGDLVAYIESLGPKPDIGAIIYTDKYNKNPQLVVHANGHQIINMHLRKRIVGSFIAKAPYQPDN
33	PrGV	Pieris rapae granulovirus poxin homolog	Pieris rapae granulovirus	JX968491.1	hypothetical protein	AHD24842.1	M1-I199 (full length)	Betabaculovirus (Granulovirus)	X-ray crystal structure determined for this protein	MESLAPFGYNKVSFKQTHHHYCGFYSLNILANIIDNVVVVNGKQYPVSDETAIDWAYDGVDTIVCEKRLVYTEREWPLHTPIYNINNQIVGLVTHGVQLSSQEYCYAVQDGFNLYNNHLTGMNLIVREKKKLIAYADREFDNKSELQIYIEETQKKNCNILGYGAILYHVNKKNAQLILHNNGLQISNSRLRKNVFGNI
34	AMEV	Amsacta moorei entomopoxvirus poxin	Amsacta moorei entomopoxvirus 'L'	NC_002520.1	AMV225	NP_065007.1	M1-N185 (full length)	Entomopoxvirus	Toxic, cannot be expressed.	MNKKYQYLGFTLDNKIPSIQNNKIYIRDKDYNISNYKLINFIYDNSDIIISEQSTIYSKENLLYGEYIFNQNKEYVGIITNKLENRYPISQENDNIIRINNVNKVNIKNQQFPVLYCDKEFPNNNILIQYLKLTPQKTKREVTIFKLFMKTIIIIHENERNIGDMLFNNPCISEYMYYDNNISFN

## Sheet: Figure 5 RNA Virus Constructs
Description	Abbreviation	Genome Origin	Genome Accession	Gene Name	Protein Accession	Construct Boundaries	Virus/Host Origin	Nuclease Activity	Protease Activity	Sequence
Macrosiphum euphorbiae virus 1 poxin-like region	MEV1	Macrosiphum euphorbiae virus 1 isolate K01	NC_028137.1	polyprotein	YP_009175071.1	G830-V1228	Amarillovirinae	Y	Not Tested	GGSRAFGVLPIAKCVERVERSKYEAVDDSPSVPIRRLKAQKPILSDEYWMEHFKTLNVGVEPNISYAQAKKDVKRTRVATAHLVKGEVAHSRPDLVGPVEGLAKVTGKISIFNFATKVRISRYLNDAEDNMVVSSKCGDKHVVGEVRTFGSSTRLASGSPIYNAVGRVCSLVTYSDGNGRYAVAAECTPSKTYVCSGLGCQYCKVESLLEKHSGKGKKKRPNKNKGGSSSLAVMQKNMNQAAKEAAELTQLKLRAEKQQQDVAEITQRMSQLKANSTAIKQGADKLAQGTGVSTIKLKPASKQGRRKAKPTTGSYSLSSLMIVGSLLLFSLMGAAFGQCFRGFIGSRFISGEVVCGLDESLSDSNYLYTTLSENTRNCLQTNNTVLREWYRVSNKLVDV
Sanxia water strider virus 6 poxin-like region	SWSV6	Sanxia water strider virus 6 strain SYSZZ-2	NC_028368.1	polyprotein	YP_009179218.1	M643-L918	Amarillovirinae	N	Not Tested	MGSKFKNTMEHIKMRLFDQIHTSDIIPNDGQFGNVQSTVSYTSEGKTYVENTNSNIHTRPVHSCSQNELNELIQTHETIGDVLVKGSFSLNFDNDIYLYDDDMNFLKFPLSKFKFYSGYNNSSFTNYRLSESFVFNHNIVSGTPLFNKEKQIVSIITTSKSINGNTYYAVTTKNDQYVTIRHDSYKWQVEGTVFKGIKGVNKIEFDMNDTCMYDKTHVSTPFSGERGPVSWQVKTSKDSPYIEVVTPDVIMPLHSLNESQAVEFARKYKTIYADVL
Shuangao lacewing virus 2 poxin-like region	SLV2	Shuangao lacewing virus 2 strain SCL	NC_028373.1	polyprotein	YP_009179223.1	M1-I236	Amarillovirinae	N	Y	MEDIPIDPSFVKYCKGDSFCYVKRDAKGKLIIAPVHSLTPDDAAEMKNRSINYVDAFANVPFAPITPNVYVGARGGKMFNVCTNLKVLTGFDGIEVLVGTMRYITYPKNLVSGTPVFNQQGDLCSIVTSSDESDYALTGFDYVNSRFLCDKYEEKTATSNFIYGQRCFNDKASLLNYIKQVENNPPTMHWTVVNWTRLDGTLHTTYVNNLKQYSAVNWHLRPFWQAHSTPRRSRVI
Apis flavivirus poxin-like region	AF	Apis flavivirus	NC_035071.1	Apis flavivirus isolate RI-A polyprotein gene	YP_009388303.1	I675-S934	Amarillovirinae	N	Not Tested	IVVPKPEQQVVRLNSPKHIESCPLAGGFTINTNQDGKQFVSSSDYVCMHSVCPDYPTIGKVLVNDIISSRPLARLTETISVGLPIGKCSEEHVYQLTGKRIAYTTRFQGKQYCGKYNSFHSERQYISGTPIFNSHGQICSIITSRQGDNYTVVNETKRVAPPSIRRPLIVFTSLLLLPVIATSLATPVANKIKATDLPPEIVAVDFSRDAERVKAKVHLIQEYKKTRSEDSAKEYMTKYQQDLSTKTSAQLDELEREVDS
Lampyris noctiluca flavivirus 1 poxin-like region	LNF1	Lampyris noctiluca flavivirus 1 isolate 17FIN1	MH620810.1	putative polyprotein	QBP37018.1	A410-S664	Amarillovirinae	N	Not Tested	AQLKFQNWLGIQKSIEAKPIKHQHKKIKHLQTIISKNDQLKVTERKNGTKKWREITRDGKVVITTKHCHTAGTLTENCIDIITNIPLGPITESVMVEGAIYLANRKVLMKKMSGETADFKVVKAFDAGRSFISGTPIYNSEGQICSVITQSCEGRWAIEQQEGTRIEGLWRKSVNAQYERCMRSLENSFIRDTELLSIHDRLLPICNQEHKTDTLPTIVTIMLALSGAFAARLGMMERITTQPATS
Gamboa mosquito virus poxin-like region (2 tandem poxins)	GMV	Gamboa mosquito virus strain GW	NC_028374.1	polyprotein	YP_009179224.1	T1165-G1579	Amarillovirinae	Y	Not Tested	TAKINFTDDMVPYYTIPQYKIELFQFLPDEIKKQRHNASVRYNGFFAEVVLPGEIGFSVKIMLPDGVSKEFDVMYDASKILESNDGVTHYIQMCPVFRCKDELLPGTPIFDTNNKLISVVTSKMDDFYHVAVFNQCLVEITDKYEAKYHNNKITISKNGKEVGFIRPGFKLLAKQMFQPVSMIASTDPGDDSGEDVPPPVPTPPAHSLHMVPFEGIVYDTSFTIGENGNKSFIQGVSPKYDTIHSLSEEHISEWTATQNYADIYIDQNFARLSTNMVMAYWPNHQFTMYTISQITRNLVSSNAQNSLNFELAPTFNSADSLISGAPIFNNSKLHSVVTNKSGNDYALVQGTDYCGHFDGKFTLSSTQDALFISDSEANKFASFFYKLPKAMMTFNIDGL…
Gentian Kobu-sho-associated virus poxin-like region (2 tandem poxins)	GKSaV	Gentian Kobu-sho-associated virus RNA, isolate: Ohasama	NC_020252.1	hypothetical polyprotein	YP_007438864.1	A773-F1210	Amarillovirinae	N	Not Tested	AIAIKAHNTPNKGWEDTYGEVSWTTNGKANFLGLTRAIHTCRSEIDSSWMKVGHDLATKVSLPKIDLNHYVYVPLSGSTCGRFAISSTISSGGRKYPAFFCESELVSGTPIMQNGQVVSVVTTSDARGLYTIMCEIPERDLPQGIPEKIWFSPELAEPVVYKATRDLWMNEEEEVYHPRPISECTANIRVSTTMRRLAVKQHNSQEPFDGRAHRISWYAGQNSNIMDDFRCIHTEEGAIASRRWHRSGCDILSREEMPHLDLEDFIEVAVASNQLMRFKITGTVVVPNVEHGVLYLNEYHSFTHVGDDLVSGTPIFQDGRVVSLVTNSVNGLEYAIMTNSPINSKQFGVGKLDLYDGFIVYELPLERVLSVQELSVFHRVTDEVPYESFICDTLHGMML…
Xingshan cricket virus poxin-like region	XCV	Xingshan cricket virus strain XSXS-2	NC_028370.1	polyprotein	YP_009179220.1	A785-R1010	Amarillovirinae	Y	Y	ATPFSGMLHGVKWVAKADHNQVEGNCGATHCGAPESVDKMHCLPDVYTDGELLKLRLVTTLRSVTVPVSSTCVKVFPVTGSVVTHGRIGSHRYGFSKVPSFDCDDVLVSGTPIFDTETGELVSVVSTSVNGRTYAITNLAYDSLDFELTGPVTLAELDKPSYGSHYGDYAEIKAKALVGDAGGDGLYINLDKNRMKAEVVSRGRSVFCTRRFGGGACWTNEQHSTR

## Sheet: Figure 6 Tree Sequences
Name	Accession	Common Name	Description	Organism	Sequence	Sequence Length	Taxonomy
RVE43054	RVE43054.1	striped riceborer	hypothetical protein evm_012285 [Chilo suppressalis]	Chilo suppressalis	MENYRIIVFLCTLISVHSEKSQASMSKPTVLNSSYKGLVENFSIPVELHERDNKTFASFGGVLPIHCATPEQVSQLSSHTHHYCGVFTEELLAPLEELAYVRLDENLAEKVFINRTKRILLISSDGVLAQWRCAPTFESANKFIAGTPLVNARGQLVSVITARRGNHYAVSTLEVTINK	179	Eukaryota; Metazoa; Ecdysozoa; Arthropoda; Hexapoda; Insecta; Pterygota; Neoptera; Holometabola; Lepidoptera; Glossata; Ditrysia; Pyraloidea; Crambidae; Crambinae; Chilo
YP_008004026	YP_008004026.1		unknown similar to AMEV225 [Adoxophyes honmai entomopoxvirus 'L']	Adoxophyes honmai entomopoxvirus 'L'	MNKKYQYLGFSLSKELSETSENIYIRNKIFSISNFKLINFIYSDNEFLLSEQSTIYSKDPLLSGEFIFNSKNEYIGIITNKLENRYPISQKNDSIIRINNIYNVNIKNQEFPIVYADKEFPDNHSLINYLKLEPQKTKREISIFKLFMKTIIIIHENERNLGEIILNKPCISEYLFNNSVLG	182	Viruses; Varidnaviria; Bamfordvirae; Nucleocytoviricota; Pokkesviricetes; Chitovirales; Poxviridae; Entomopoxvirinae; Betaentomopoxvirus
NP_065007	NP_065007.1		hypothetical protein AMV225 [Amsacta moorei entomopoxvirus]	Amsacta moorei entomopoxvirus	MNKKYQYLGFTLDNKIPSIQNNKIYIRDKDYNISNYKLINFIYDNSDIIISEQSTIYSKENLLYGEYIFNQNKEYVGIITNKLENRYPISQENDNIIRINNVNKVNIKNQQFPVLYCDKEFPNNNILIQYLKLTPQKTKREVTIFKLFMKTIIIIHENERNIGDMLFNNPCISEYMYYDNNISFN	185	Viruses; Varidnaviria; Bamfordvirae; Nucleocytoviricota; Pokkesviricetes; Chitovirales; Poxviridae; Entomopoxvirinae; Betaentomopoxvirus
YP_008003765	YP_008003765.1		unknown similar to AMEV225 [Mythimna separata entomopoxvirus 'L']	Mythimna separata entomopoxvirus 'L'	MNKNFQYLGFTLDKKIPSIIDNRLHIRDKIFNINNFKLINFIFENNDFIVSEQSSIYSKDELLYGEYIFNSENKYMGIITNKLENRYPISQEHDIIIRINNISNITIKNQEFPIIYCDKEFPNKNTLIEYLKLTPQITKREITIFKLFMKTIIVIHENERNIGEIIFNSPCISEYMHHNNINILC	185	Viruses; Varidnaviria; Bamfordvirae; Nucleocytoviricota; Pokkesviricetes; Chitovirales; Poxviridae; Entomopoxvirinae; Betaentomopoxvirus
YP_008004632	YP_008004632.1		unknown similar to AMEV225 [Choristoneura rosaceana entomopoxvirus 'L']	Choristoneura rosaceana entomopoxvirus 'L'	MNKKFQYLGFKMDKKIPVAIDNKIYIRDSEYNISNFKLINFIYDKNDLMISEQSTIYSKQNLLYGEYIFNSNKDYMGIITNKLENRYSISQENDIMIRINNVYNVNIKNQEFPILYCDKEFPNNDILMNYLKLVPQRSRREITIYRLFMKTIIIIHENERNIGEIIFNNPCISEYLGENDNVNFF	185	Viruses; Varidnaviria; Bamfordvirae; Nucleocytoviricota; Pokkesviricetes; Chitovirales; Poxviridae; Entomopoxvirinae; Betaentomopoxvirus
YP_008004331	YP_008004331.1		unknown similar to AMEV225 [Choristoneura biennis entomopoxvirus]	Choristoneura biennis entomopoxvirus	MNKKFQYLGFKMDKKIPVAIDNKIYIRDSEYNISNFKLINFIYDKNDLMISEQSTIYSKQNLLYGEYIFNSNKDYMGIITNKLENRYSISQDNDNMIRINNVYNVNIKNQEFPILYCDKEFPNNDILMNYLKLVPQRSRREITIYRLFMKTIIIIHENERNIGEIIFNNPCISEYLGENDNVNFFN	186	Viruses; Varidnaviria; Bamfordvirae; Nucleocytoviricota; Pokkesviricetes; Chitovirales; Poxviridae; Entomopoxvirinae; Betaentomopoxvirus
NP_048308	NP_048308.1		ORF MSV237 putative vaccinia B2R homolog, similar to SW:P20999 [Melanoplus sanguinipes entomopoxvirus]	Melanoplus sanguinipes entomopoxvirus	MFISHHLGGYNESLHAFPDLSTDKVIDVTKYSKIYVDDNMYIISGLMWIFSKIENRYIGGLVPYFVCNDILEGGSLITDENNTAISCVTMKKDNMYALSGLAYETFDQNINVPIYHHELENGHSVYGSIQGKYEIIKEYAKSFKQSSHNSISEYHIWVGEKLIQITSINNDKKEIFRFRIKKGGILADEYVI	192	Viruses; Varidnaviria; Bamfordvirae; Nucleocytoviricota; Pokkesviricetes; Chitovirales; Poxviridae; Entomopoxvirinae
YP_009408359	YP_009408359.1		N-term half of ECTV schlafen-like protein [Murmansk poxvirus]	Murmansk poxvirus	MEFYPHSLGGYDSSLHAFPGLSATVVNNVTNYTKITVNGNTYDVSDVYMWCYSYVDNRYIGGLLPMFECKDDLKVGEPICDLHGTQISAVTFRCDNYYAISGIGYETLDICTNDDIKIHHHKLSIGKSVYGDTADDYDVIKSMANRYSDYKTEHIKEYHIWVGVNIIHITTVDKNRKEISRVRVKRGGCLMNS	193	Viruses; Varidnaviria; Bamfordvirae; Nucleocytoviricota; Pokkesviricetes; Chitovirales; Poxviridae; Chordopoxvirinae; Centapoxvirus; unclassified Centapoxvirus
YP_009408559	YP_009408559.1		Schlafen [NY_014 poxvirus]	NY_014 poxvirus	MEFYPHSLGGYDSSLHAFPGLSATVVNNVTNYNKITVNGNTYNVSDVYMWCYSYVDNRYIGGLLPMFECKDDLKVGEPICDLHGAQISAVTFRCDDYYAISGIGYETFDICTNNDIKIHHHKLSIGKSVYGDTADDYDVIKSMASCYSDYKPGYIKEYHIWVGVNIIHITAVDKNRKEISRVRVKRGGCLMNS	193	Viruses; Varidnaviria; Bamfordvirae; Nucleocytoviricota; Pokkesviricetes; Chitovirales; Poxviridae; Chordopoxvirinae; Centapoxvirus; unclassified Centapoxvirus
YP_009182253	YP_009182253.1		acetyltransferase-like protein [Diatraea saccharalis granulovirus]	Diatraea saccharalis granulovirus	MDTLVPFGRVQFKRTHHHYCGFYSLQQLSSIVDDKVVVNGKEYEVTGETAIDWAYDGVDTIVAEKRLVYSKEEWPLHGVIYNINEEIVGLVGQGVKTADGDYCYAIQDGFNLYTNHLSNINLIVREKNKLIAYADKEFDDKNELIKYLDNTKGGGGEVGAILYHKNKKQAQLILYQSGVQLSNTHLRKSVFGVL	194	Viruses; Baculoviridae; Betabaculovirus
YP_009268718	YP_009268718.1		schlafen protein [Pteropox virus]	Pteropox virus	MAAAKFLPHLDADAAVNKLHCFPGLSSNKAVDVTQFSHVVVNGCRYETHRYMWVSSTIGERYIGGFLPYILIEGANKPEVGDLIYSEDGEPISCITRSKGDAFCVSGIGYETLDLQSNVRVHHRTIVDKHSVYGGQQGPYCVIKQYALEKAARSSGSVTDYYVWIGDNITHIVGTCANGKEVSRVRIKHGGIFS	194	Viruses; Varidnaviria; Bamfordvirae; Nucleocytoviricota; Pokkesviricetes; Chitovirales; Poxviridae; Chordopoxvirinae
QDJ95127	QDJ95127.1		schlafen-like protein [Hypsugopox virus]	Hypsugopox virus	MDNGAIFFPHSLHDYNPSLHAFPGLSANVSINVTKLKYVIVENKKYKVYKYVWFSSIIGNRYIGAFLPYFKSNKKINVGVIIYDDKNNPVSCITGFNENLYVISGIGYETLDVDVSNGINVIHHVLKDGNSIYGSNQNIYDVIKQIAQEKSIIKSNNIVKYNIWIGSSISQITAVDDNDKEIMRTRIKHGGYIVK	195	Viruses; Varidnaviria; Bamfordvirae; Nucleocytoviricota; Pokkesviricetes; Chitovirales; Poxviridae; unclassified Poxviridae
YP_009408111	YP_009408111.1		Partial schlafen-like protein [Eptesipox virus]	Eptesipox virus	MSATTVAFYPHSLCEYDSNLHAFPGLSSTKAINVSTIKYVIVEGKKYKVYKYIWASSIVENRYIGGFLPYFKSKQQHKPGIIIYNEENEPISCITNFINNLYVISGIGYETFDIDVSESIEIKHHILKDGNSIYGSIQNKYPIIKPIAQEKSKLKSGPIVKYNIWVGKDITQITAVDNQDKEVMRTRIKHGGYIIE	196	Viruses; Varidnaviria; Bamfordvirae; Nucleocytoviricota; Pokkesviricetes; Chitovirales; Poxviridae; unclassified Poxviridae
NP_663224	NP_663224.1		hypothetical protein [Phthorimaea operculella granulovirus]	Phthorimaea operculella granulovirus	MMDVPTLVPFGQIQYKSTHHHYCGFYSLTVLAEIVDNTVVVNGKLYTVSDETAIDWAYDGIDTIISEKRLVYTNNVWPLNAPIYNIEHQIVGIVTRGIETTDGDNCYAVQDGFRLLNIHLSNVNLLVREKRKPIVYADQQFDTKQELNVYLTKNKSADSKYGAIMYHTNKLNAQLVLFAKGHQISNIHLRKKIFGAL	197	Viruses; Baculoviridae; Betabaculovirus
QBH67193	QBH67193.1		hypothetical protein PhopGVgp059 [Phthorimaea operculella granulovirus]	Phthorimaea operculella granulovirus	MMDVPTLVPFGQIQYKSTHHHYCGFYSLTVLAEIVDNTVVVNGKLYTVSDETAIDWAYDGIDTIISEKRLVYTNNVWPLNAPIYNIEHQIVGIVTRGIETTDGDNCYAVQDGFRLLNIHLSNVNLLVREKRKPIVYADQQFDTKQELNVYLTKNKIADSKYGAIMYHTNKLNAQLVLFAKGHQISNIHLRKKIFGAL	197	Viruses; Baculoviridae; Betabaculovirus
KOB73537	KOB73537.1	winter moth	Immune-related Hdd13 [Operophtera brumata]	Operophtera brumata	MTVACKYVQENRAKRAVSRACRGDVHPGRDPRARRQEVEEHSKTTHHYCDVFTEQVLAPLGELAYVRVDENTAEKVAILSHHVFINRNKSILIISSDGMLAQWRCAPTFESTNMYIAGTPIVSARQLVYGDRTFPSREALREFVAALPPGAASPPGAAVDFTPVLHLAPAPRVSLVADSGRQIAHNILQGVIVKDIEYL	199	Eukaryota; Metazoa; Ecdysozoa; Arthropoda; Hexapoda; Insecta; Pterygota; Neoptera; Holometabola; Lepidoptera; Glossata; Ditrysia; Geometroidea; Geometridae; Larentiinae; Operophtera
YP_003429378	YP_003429378.1		acetyltransferase [Artogeia rapae granulovirus]	Artogeia rapae granulovirus	MESLAPFGYNKVSFKQTHHHYCGFYSLNILANIIDNVVVVNGKQYPVSDETAIDWAYDGVDTIVCEKRLVYTEREWPLHTPIYNINNQIVGLVTRGVQLSSQEYCYAVQDGFNLYNNHLTGMNLIVRQKKKLIAYADREFDNKSELKIYIEETQNKNCNILNYGAILYHVNKKNAQLILHNNGVQISNSQLRKSVFGNI	199	Viruses; Baculoviridae; Betabaculovirus
YP_009229944	YP_009229944.1		hypothetical protein [Cnaphalocrocis medinalis granulovirus]	Cnaphalocrocis medinalis granulovirus	MNIEIIPFGVKGSSRYKATHLHYCGYYSNTLLAHIVQNVVVVENENFVVSENTAIDWAYDGHDTIITEKRLVYTIKEWPIHTPIYNIHKQLVGIVTYGVQQSSKTYCYAIQDGFRLFNCHLSNLCLVVREKTKKFVYADKQFDMKEDLVRYVHSLLPSYYDANGAILYHTKKFDTQLVLHQGNQQISIIQLRRPIFGAV	199	Viruses; Baculoviridae; Betabaculovirus
YP_009513099	YP_009513099.1		hypothetical protein AsGV069 [Agrotis segetum granulovirus]	Agrotis segetum granulovirus	MNHSTVPSLVPFDGSSLYKSTHHHYCGFYSLFILAPIIDDTVVVDGKQYKLSEENAIDWAYDGTDTIITEKRLLYTEHPLEPNTLIYNVNHEIVGILLRYMVTKDGEYCYAIQDGFKLYNNHLTDTNIVVREKKKLIVYADQQFDTKEDLMKYLKEGKKSAGRGAILYHKGGRDAQLVLYENGRNLSNSHLRRRVFGVL	199	Viruses; Baculoviridae; Betabaculovirus
ADO85481	ADO85481.1		unknown [Pieris rapae granulovirus]	Pieris rapae granulovirus	MESLAPFGYNKVSFKQTHHHYCGFYSLNILANIIDNVVVVNGKQYPVSDETAIDWAYDGVDTIVCEKRLVYTEREWPLHTLIYNINNQIVGLVTRGVQLSTQEYCYAVQDGFNLYNNHLTGMNLIVREKKKLIAYADREFDNKSELKIYIEETQKKNCNILSYGAILYHVNKKNAQLILHNNGVQISNSQLRKSVFGNI	199	Viruses; Baculoviridae; Betabaculovirus; unclassified Betabaculovirus
AHD24842	AHD24842.1		hypothetical protein [Pieris rapae granulovirus]	Pieris rapae granulovirus	MESLAPFGYNKVSFKQTHHHYCGFYSLNILANIIDNVVVVNGKQYPVSDETAIDWAYDGVDTIVCEKRLVYTEREWPLHTPIYNINNQIVGLVTHGVQLSSQEYCYAVQDGFNLYNNHLTGMNLIVREKKKLIAYADREFDNKSELQIYIEETQKKNCNILGYGAILYHVNKKNAQLILHNNGLQISNSRLRKNVFGNI	199	Viruses; Baculoviridae; Betabaculovirus; unclassified Betabaculovirus
NP_872510	NP_872510.1		ORF_56 [Adoxophyes orana granulovirus]	Adoxophyes orana granulovirus	METTTINGIVPFGVDTIQYKATRHHYCGFYSTILLSGIVNNVVIVDGDRYDVSNETVLDWAYDGIDTILTEKRIVYSNKPWLLHEPIYNVNMEIIGIVLQNYTHDADKYVYLVQDGYNLYSNLLSNVNLIVREKTKPIAYADQLFDTKKELFEYLNTTNLNKETGKYGAILYHQNSKNAQLMLHFDGKQLSNSHLRKNIFI	201	Viruses; Baculoviridae; Betabaculovirus
YP_009091897	YP_009091897.1		hypothetical protein [Erinnyis ello granulovirus]	Erinnyis ello granulovirus	MQSSVVPFGDNTFPIKQTHHHYCGFYSVQVLATIINNVVVVNGKQYNVSDETAIDWAFDGEDTIVTEKRLLYTDEELPLHAPIYNIDHQLVGIVLAGMQTTDGDYCYAIQDGFKSLNIHLSNMNLVVREKRKMACYADQQFDTKQELVDYINNRRRIDEMGDSDHGAILYHVNKKNAQLVVFQNGLQVINCHLRKKVFGVL	201	Viruses; Baculoviridae; Betabaculovirus
YP_654469	YP_654469.1		unknown [Choristoneura fumiferana granulovirus]	Choristoneura fumiferana granulovirus	MMNNLSVIMEALVPFGVNNISLKQTHHHYCGFYSLNILASIINNVVIIDNIHYEVSNDTAIDWAFDGEDTIITEKRLLYTNADLPLYATIFNLNHDIVGMVLRGIQTSDGKYCYALQDGFRLYNNHLSNVNLIVREKQKIIAYADRQFDNKQELVDYLNNDEEHKNSGAILYHTNTKNAQLILYKKGLQISNCHLRKTIYAV	202	Viruses; Baculoviridae; Betabaculovirus
YP_004821513	YP_004821513.1		schlafen-like protein [Yokapox virus]	Yokapox virus	MKKHNYHKYMMEFYPHALGGYNPDLHSFPGLSSTIVNNVTKYDEISVNNDVYKVSDLYMWCYSYVNNRYIGGLLPMFECKKDLNIGEPICDKHGTQISAVTFRCNDYYAISGIGYETLDVCLNDDIKIYHHKLSSGKSVYGNTEAEYDIIKSMARNYSIYKPGHIYAYHIWVRNDIVIITTTDKNCKEISRMRIKKGGCLINS	203	Viruses; Varidnaviria; Bamfordvirae; Nucleocytoviricota; Pokkesviricetes; Chitovirales; Poxviridae; Chordopoxvirinae; Centapoxvirus
YP_009505994	YP_009505994.1		Clas52 [Clostera anastomosis granulovirus B]	Clostera anastomosis granulovirus B	MQSSLVPFAGNTTLHLKQTHHHYCGFFSLHVLATIIDNVVVINGRQYTVSEDTAIDWAFDGVDTIVTEKRLLYTEESLPLHSPIYNIENNIVGLVLRGYVTTDGDWCYAIQNGFTAQNFHLSNNNLVVREKRRLISYADQQFDTKQELVEYLEGLKSRDKDSFNIHKNFNTGAILYHVHKKNAQLVVYQDGVQILNCHLRKNVYGVL	207	Viruses; Baculoviridae; Betabaculovirus
ATB55239	ATB55239.1		CPXV197 protein [Cowpox virus]	Cowpox virus	MAMFYAHAFGGYDENLHAFPGISSTVANDVRKYSVVSVYNKKYKIVKNKYMWCYSQVNKRYIGALLPMFECNDYLQIGDPIHDLEGNQISIVTYRHKNYYALSGIGYESLDVCLEGVGIHHHTLEAGNAVYGKVQHEYHTIKEKAKEMNSLSPGPIIDYHVWIGDCVCQVTAVDVHGKEIMRMRFKKGAVLPIPNLVKVKVGEENDTVNLSTSISVS	217	Viruses; Varidnaviria; Bamfordvirae; Nucleocytoviricota; Pokkesviricetes; Chitovirales; Poxviridae; Chordopoxvirinae; Orthopoxvirus
ATB55676	ATB55676.1		CPXV197 protein [Cowpox virus]	Cowpox virus	MAMFYAHAFGGYDENLHAFPGISSTVANDVRKYSIVSVYNKKYKIVKNKYMWCYSQVNKRYIGALLPMFECNDYLQIGDPIHDLEGNQISIVTYRHKNYYALSGIGYESLDVCLEGVGIHHHTLEAGNAVYGKVQHEYHTIKEKAKEMNSLSPGPIIDYHVWIGDCVCQVTAVDVHGKEIMRMRFKKGAVLPIPNLVKVKVGEENDTVNLSTSISVS	217	Viruses; Varidnaviria; Bamfordvirae; Nucleocytoviricota; Pokkesviricetes; Chitovirales; Poxviridae; Chordopoxvirinae; Orthopoxvirus
SPN68040	SPN68040.1		CPXV197 protein [Cowpox virus]	Cowpox virus	MAMFYAHAFGGYDENLHAFPGISSTVANDVRKYSVVSVYNKKYKIVKNKYMWCYSQVNKRYIGALLPMFECNEYLQIGDPIHDLEGNQISIVTYHNKNYYALSGIGYESLDVCLEGVGIHHHTLEAGNAVYGKVQHDYYTIKEKAKEMNSLSPGPIIDYHVWIGDCVCQVTAVDVHGKEIMRMRFKRGAVIPIPNLVKVKVGEENDTVNLSTSISVS	217	Viruses; Varidnaviria; Bamfordvirae; Nucleocytoviricota; Pokkesviricetes; Chitovirales; Poxviridae; Chordopoxvirinae; Orthopoxvirus
AVO21184	AVO21184.1		schlafen-like protein [Buffalopox virus]	Buffalopox virus	MAMFYAHALGGYDENLHAFPGISSTVANDVRKYSVVLVYNNKYDIVKDKYMWCYSQVNKRYIGALLPMFECNEYLQIGDPIHDQEGNQISIITYRHKNYYALSGIGYESLDLCLEGVGIHHHVLETGNAVYGKVQHDYSTIKEKAKEMSTLSPGPIIDYHVWIGDCICQVTAVDVHGKEIMRMRFKKGAVLPIPNLVKVGENDTENLSSTISAAPSR	217	Viruses; Varidnaviria; Bamfordvirae; Nucleocytoviricota; Pokkesviricetes; Chitovirales; Poxviridae; Chordopoxvirinae; Orthopoxvirus; Vaccinia virus
YP_009001652	YP_009001652.1		nucleopolyhedrovirus p26 protein [Anomala cuprea entomopoxvirus]	Anomala cuprea entomopoxvirus	MDIISWGLYNNKYVTIDNYYIKPIHFSDKNSINKYYQFPNLITEKLLSKNIYDHKKIMIIDDNANILNFNVNDSVLTYHKFNHSIIGGILPGFKYEKFIYPGTPIFDSNTGELISIITINYKYKNYYIYPISGPGKSSWNIKFKGFDPKIYYVELSKTQSEYIKDETKNNTYMDDKYFDIVITINRFDNIVNLIKVQSNGYELERMRFECNENIKVIT	218	Viruses; Varidnaviria; Bamfordvirae; Nucleocytoviricota; Pokkesviricetes; Chitovirales; Poxviridae; Entomopoxvirinae; Alphaentomopoxvirus
ABZ80154	ABZ80154.1		unknown [synthetic Vaccinia virus]	synthetic Vaccinia virus	MAMFYAHALGGYDENLHAFPGISSTVANDVRKYSVVSVYNNKYDIVKDKYMWCYSQVNKRYIGALLPMFECNEYLQIGNPIHDQEGNQISIITYRHKNYYALSGIGYESLDLCLEGVGIHHHVLETGNAVYGKVQHDYSTIKEKAKEMSALSPGPIIDYHVWIGDCICQVTAVDVHGKEIMKMRFKKGAVLPIPNLVKVKLGENDTENLSSTISAAPSR	219	other sequences; artificial sequences
AAQ93281	AAQ93281.1		VACCL3_195 [Vaccinia virus]	Vaccinia virus	MAMFYAHALGGYDENLHAFPGISSTVANDVRKYSVVSVYNNKYDIVKDKYMWCYSQVNKRYIGALLPMFECNEYLQIGDPIHDQEGNQISIITYRHKNYYALSGIGYESLDLCLEGVRIHHHVLETGNAVYGKVQHDYSTIKEKAKEMSTLSPGPIIDYHVWIGDCICQVTAVDVHGKEIMKMRFKKGAVLPIPNLVKVKLGENDTENLSSTISAAPSR	219	Viruses; Varidnaviria; Bamfordvirae; Nucleocytoviricota; Pokkesviricetes; Chitovirales; Poxviridae; Chordopoxvirinae; Orthopoxvirus
AAR18027	AAR18027.1		VACAC2_195 [Vaccinia virus]	Vaccinia virus	MAMFYAHALGGYDENLHAFPGISSTVANDVRKYSVVSVYNNKYDIVKDKYMWCYSQVNKRYIGALLPMFECNEYLQIGDPIHDQEGNQISIITYRHKNYYALSGIGYESLDLCLEGVGIHHHVLEAGNAVYGKVQHDYSTIKEKAKEMSTLSPGPIIDYHVWIGDCICQVTAVDVHGKEIMKMRFKKGAVLPIPNLVKVKLGENDTENLSSTISAAPSR	219	Viruses; Varidnaviria; Bamfordvirae; Nucleocytoviricota; Pokkesviricetes; Chitovirales; Poxviridae; Chordopoxvirinae; Orthopoxvirus
AAW23627	AAW23627.1		hypothetical protein m8238R [Vaccinia virus]	Vaccinia virus	MAMFYAHALGGYDENLHAFPGISSTVANDVRKYSVVLVYNNKYDIVKDKYMWCYSQVNKRYIGALLPMFECNEYLQIGDPIHDQEGNQISIITYRHKNYYALSGIGYESLDLCLEGVGIHHHVLETGNAVYGKVQHDYSTIKEKAKEMSTLSPGPIIDYHVWIGDCICQVTAVDVHGKEIMRMRFKKGAVLPIPNLVKVKLGENDTENLSSTISAAPSR	219	Viruses; Varidnaviria; Bamfordvirae; Nucleocytoviricota; Pokkesviricetes; Chitovirales; Poxviridae; Chordopoxvirinae; Orthopoxvirus
ABD52680	ABD52680.1		hypothetical protein List178 [Vaccinia virus]	Vaccinia virus	MAMFYAHALGGYDENLHAFPGISSTVANDVRKYSVVLVYNNKYDIVKDKYMWCYSQVNKRYIGALLPMFECNEYLQIGDPIHDQEGNQISIITYRHKNYYALSGIGYESLDLCLEGVGIHHHVLETGNAVYGKVQHDYSTIKEKAKEMNALSPGPIIDYHVWIGDCICQVTAVDVHGKEIMKMRFKKGAVLPIPNLVKVKLGENDTENLSSTISAAPSR	219	Viruses; Varidnaviria; Bamfordvirae; Nucleocytoviricota; Pokkesviricetes; Chitovirales; Poxviridae; Chordopoxvirinae; Orthopoxvirus
ABD57713	ABD57713.1		VACV175 [Vaccinia virus]	Vaccinia virus	MAMFYAHALGGYDENLHAFPGISSTVANDVRKYSVVSVYNNKYDIVKDKYMWCYSQVNKRYIGALLPMFECNEYLQIGDPIHDQEGNQISIITYRHKNYYALSGIGYESLDLCLEGVGIHHHVLEAGNAVYGKVQHDYSTIKEKAKEMNALSSGPIIDYHVWIGDCICQVTAVDVHGKEIMRMRFKKGAVLPIPNLVKVKLGENDTENLSSTISAAPSR	219	Viruses; Varidnaviria; Bamfordvirae; Nucleocytoviricota; Pokkesviricetes; Chitovirales; Poxviridae; Chordopoxvirinae; Orthopoxvirus
AEY72758	AEY72758.1		hypothetical protein VAC_DPP9_195 [Vaccinia virus]	Vaccinia virus	MAMFYAHALGGYDENLHAFPGISSTVANDVRKYSVVSVYNNKYDIVKDKYMWCYSQVNKRYIGALLPMFECNEYLQIGDPIHDQEGNQISIITYRHKNYYALSGIGYESLDLCLEGVGIHHHVLETGNAVYGKVQHDYFTIKEKAKEMNALSSGPIIDYHVWIGDCICQVTAVDVHGKEIMKMRFKKGAVLPIPNLVKVKLGENDTENLSSTISAAPSR	219	Viruses; Varidnaviria; Bamfordvirae; Nucleocytoviricota; Pokkesviricetes; Chitovirales; Poxviridae; Chordopoxvirinae; Orthopoxvirus
AEY72997	AEY72997.1		hypothetical protein VAC_DPP10_195 [Vaccinia virus]	Vaccinia virus	MAMFYAHALGGYDENLHAFPGISSTVANDVRKYSVVSVYNNKYDIVKDKYMWCYSQVNKRYIGALLPMFECNEYLQIGDPIHDQEGNQISIITYRHKNYYALSGIGYESLDLCLEGVRIHHHTLETGNAVYGKVQHDYSTIKEKAKEMSTLSPGPIIDYHVWIGDCICQVTAVDVHGKEIMKMRFKKGAVLPIPNLVKVKLGENDTENLSSTISAAPSR	219	Viruses; Varidnaviria; Bamfordvirae; Nucleocytoviricota; Pokkesviricetes; Chitovirales; Poxviridae; Chordopoxvirinae; Orthopoxvirus
AEY73473	AEY73473.1		hypothetical protein VAC_DPP12_195 [Vaccinia virus]	Vaccinia virus	MAMFYAHALGGYDENLHAFPGISSTVANDVRKYSVVSVYNNKYDIVKDKYMWCYSQVNKRYIGALLPMFECNEYLQIGDPIHDQEGNQISIITYRHKNYYALSGIGYESLDLCLEGVGIHHHVLETGNAVYGKVQHDYSTIKEKAKEMSTLSPGPIIDYHVWIGDCICQVTAVDVHGKEIMKMRFKKGAVLPIPNLVKVKLGENDTENLSSTISAAPSR	219	Viruses; Varidnaviria; Bamfordvirae; Nucleocytoviricota; Pokkesviricetes; Chitovirales; Poxviridae; Chordopoxvirinae; Orthopoxvirus
AEY73716	AEY73716.1		hypothetical protein VAC_DPP13_195 [Vaccinia virus]	Vaccinia virus	MAMFYAHALGGYDENLHAFPGISSTVANDVRKYSVVSVYNNKYDIVKDKYMWCYSQVNKRYIGALLPMFECNEYLQIGDPIHDQEGNQISIITYRHKNYYALSGIGYESLDLCLEGVRIHHHTLEAGNAVYGKVQHDYSTIKEKAKEMNALSSGPIIDYHVWIGDCICQVTAVDVHGKEIMKMRFKKGAVLPIPNLVKVKLGENDTENLSSTISAAPSR	219	Viruses; Varidnaviria; Bamfordvirae; Nucleocytoviricota; Pokkesviricetes; Chitovirales; Poxviridae; Chordopoxvirinae; Orthopoxvirus
AEY74653	AEY74653.1		hypothetical protein VAC_DPP19_195 [Vaccinia virus]	Vaccinia virus	MAMFYAHALGGYDENLHAFPGISSTVANDVRKYSVVSVYNNKYDIVKDKYMWCYSQVNKRYIGALLPMFECNEYLQIGDPIHDQEGNQISIITYRHKNYYALSGIGYESLDLCLEGVGIHHHTLEAGNAVYGKVQHDYSTIKEKAKEMSTLSPGPIIDYHVWIGDCICQVTAVDVHGKEIMRMRFKKGAVLPIPNLVKVKLGENDTENLSSTISAAPSR	219	Viruses; Varidnaviria; Bamfordvirae; Nucleocytoviricota; Pokkesviricetes; Chitovirales; Poxviridae; Chordopoxvirinae; Orthopoxvirus
AGB75902	AGB75902.1		hypothetical protein [Vaccinia virus]	Vaccinia virus	MAMFYAHALGGYDENLHAFPGISSTVANDVRKYSVVSVYNNKYDIVKDKYMWCYSQVNKRYIGALLPMFECNEYLQIGDPIHDQEGNQISIITYRHKNYYALSGIGYESLDLCLEGVGIHHHVLETGNAVYGKVQHDYSTIKEKAKEMNALSSGPIIDYHVWIGDCICQVTAVDVHGKEIMRMRFKKGAVLQIPNLVKVKLGENDTENLSSTISAAPSR	219	Viruses; Varidnaviria; Bamfordvirae; Nucleocytoviricota; Pokkesviricetes; Chitovirales; Poxviridae; Chordopoxvirinae; Orthopoxvirus
AGJ91659	AGJ91659.1		schlafen [Vaccinia virus]	Vaccinia virus	MAMFYAHALGGYDENLHAFPGISSTVANDVRKYSVVSVYNNKYDIVKDKYMWCYSQVNKRYIGALLPMFECNEYLQIGDPIHDQEGNQISIITYRHKNYYALSGIGYESLDLCLEGVRIHHHTLEAGNAVYGKVQHDYSTIKEKAKEMNALSSGPIIDYHVWIGDCICQVTAVDVHGKEIMRMRFKKGAVLPIPNLVKVKLGENDTENLSSTISAAPSR	219	Viruses; Varidnaviria; Bamfordvirae; Nucleocytoviricota; Pokkesviricetes; Chitovirales; Poxviridae; Chordopoxvirinae; Orthopoxvirus
AGK06653	AGK06653.1		hypothetical protein VAC_TP3_189 [Vaccinia virus]	Vaccinia virus	MAMFYAHALGGYDENLHAFPGISSTVANDVRKYSVVSVYNNKYDIVKDKYMWCYSQVNKRYIGALLPMFECNEYLQIGDPIHDQEGNQISIITYRHKNYYALSGIGYESLDLCLEGVGIHHHVLETGNAVYGKVQHDYSTIKEKAKEMSTLSPGPIIDYHVWIGDCICQVTAVNVHGKEIMRMRFKKGAVLPIPNLVKVKLGENDTENLSSTISAAPSR	219	Viruses; Varidnaviria; Bamfordvirae; Nucleocytoviricota; Pokkesviricetes; Chitovirales; Poxviridae; Chordopoxvirinae; Orthopoxvirus
AHB35823	AHB35823.1		hypothetical protein [Vaccinia virus]	Vaccinia virus	MAMFYAHALGGYDENLHAFPGISSTVANDVRKYSVVLVYNNKYDIVKDKYMWCYSQVNKRYIGALLPMFECNEYLQIGDPIHDQEGNQISIITYRHKNYYALSGIGYESLDLCLEGVGIHHHTLEAGNAVYGKVQHDYFTIKEKAKEMNALSSGPIINYHVWIGDCICQVTAVDVHGKEIMRMRFKKGAVLPIPNLVKVKLGENDTENLFSTISAAPSR	219	Viruses; Varidnaviria; Bamfordvirae; Nucleocytoviricota; Pokkesviricetes; Chitovirales; Poxviridae; Chordopoxvirinae; Orthopoxvirus
AIX99305	AIX99305.1		schlafen [Vaccinia virus]	Vaccinia virus	MAMFYAHALGGYDENLHAFPGISSTVANDVRKYSVVSVYNNKYDIVKDKYMWCYSQVNKRYIGALLPMFECNEYLQIGDPIHDQEGNQISIITYRHKNYYALSGIGYESLDLCLEGVGIHHHTLEAGNAVYGKVQHDYSTIKEKAKEMNALSSGPIIDYHVWIGDCICQVTAVDVHGKEIMRMRFKKGAVLPIPNLVKVKLGENDTENLSSTISAAPSR	219	Viruses; Varidnaviria; Bamfordvirae; Nucleocytoviricota; Pokkesviricetes; Chitovirales; Poxviridae; Chordopoxvirinae; Orthopoxvirus
ALF05185	ALF05185.1		schlafen-like protein [Vaccinia virus]	Vaccinia virus	MAMFYAHALGGYDENLHAFPGISSTVANDVRKYSVVSVYNNKYDIVKDKYMWCYSQVNKRYIGALLPMFECNEYLQIGDPIHDQEGNQISIITYRHKNYYALSGIGYESLDLCLEGVRIHHHTLEAGNAVYGKVQHDYFTIKEKAKEMNALSSGPIIDYHVWIGDCICQVTAVDVHGKEIMRMRFKKGAVLPIPNLVKVKLGENDTENLSSTISAAPSR	219	Viruses; Varidnaviria; Bamfordvirae; Nucleocytoviricota; Pokkesviricetes; Chitovirales; Poxviridae; Chordopoxvirinae; Orthopoxvirus
AND74018	AND74018.1		hypothetical protein [Vaccinia virus]	Vaccinia virus	MAMFYAHAFGGYDENLHAFPGISSTVANDVRKYSVVLVYNNKYDIVKDKYMWCYSQVNKRYIGALLPMFECNEYLQIGDPIHDQEGNQISIITYCHKNYYALSGIGYESLDLCLEGVGIHHHVLETGNAVYGKVQHDYSTIKEKAKEMSTLSSGPIIDYHVWIGDCICQVTAVDVHGKEIMKMRFKKGAVLPIPNLVKVKLGENDTENLSSTISAAPSR	219	Viruses; Varidnaviria; Bamfordvirae; Nucleocytoviricota; Pokkesviricetes; Chitovirales; Poxviridae; Chordopoxvirinae; Orthopoxvirus
AQY54957	AQY54957.1		Schlafen-like protein [Vaccinia virus]	Vaccinia virus	MAMFYAHALGGYDENLHAFPGISSTVANDVRKYSVVSVYNNKYDIVKDKYMWCYSQVNKRYIGALLPMFECNEYLQIGDPIHDQEGNQISIITYRHKNYYALSGIGYESLDLCLEGVGIHHHVLETGNAVYGKVQHDYSTIKEKAKEMNALSSGPIIDYHVWIGDCICQVTAVDVHGKEIMKMRFKKGAVLPIPNLVKVKLGENDTENLSSTISAAPSR	219	Viruses; Varidnaviria; Bamfordvirae; Nucleocytoviricota; Pokkesviricetes; Chitovirales; Poxviridae; Chordopoxvirinae; Orthopoxvirus
YP_233066	YP_233066.1		hypothetical protein VACWR184 [Vaccinia virus]	Vaccinia virus	MAMFYAHALGGYDENLHAFPGISSTVANDVRKYSVVSVYNNKYDIVKDKYMWCYSQVNKRYIGALLPMFECNEYLQIGDPIHDQEGNQISIITYRHKNYYALSGIGYESLDLCLEGVGIHHHVLETGNAVYGKVQHDYSTIKEKAKEMNALSPGPIIDYHVWIGDCICQVTAVDVHGKEIMRMRFKKGAVLPIPNLVKVKLGENDTENLSSTISAAPSR	219	Viruses; Varidnaviria; Bamfordvirae; Nucleocytoviricota; Pokkesviricetes; Chitovirales; Poxviridae; Chordopoxvirinae; Orthopoxvirus
ABH08291	ABH08291.1		HSPV180a [Horsepox virus]	Horsepox virus	MAMFYAHALGGYDENLHAFPGISSTVANDVRKYSVVLVYNNKYDIVKDKYMWCYSQVNKRYIGALLPMFECNEYLQIGDPIHDQEGNQISIITYRHKNYYALSGIGYESLDLCLEGVRIHHHTLEAGNAVYGKVQHDYSTIKEKAKEMNALSSGLIIDYHVWIGDCICQVTAVDVHGKEIMRMRFKKGAVLPIPNLVKVKLGENDTENLSSTISAAPSR	219	Viruses; Varidnaviria; Bamfordvirae; Nucleocytoviricota; Pokkesviricetes; Chitovirales; Poxviridae; Chordopoxvirinae; Orthopoxvirus; Vaccinia virus
POXIN_VACCC	P20999.1		RecName: Full=Poxin; AltName: Full=Immune nuclease	Vaccinia virus Copenhagen	MAMFYAHALGGYDENLHAFPGISSTVANDVRKYSVVSVYNNKYDIVKDKYMWCYSQVNKRYIGALLPMFECNEYLQIGDPIHDQEGNQISIITYRHKNYYALSGIGYESLDLCLEGVGIHHHVLETGNAVYGKVQHDYSTIKEKAKEMSTLSPGPIIDYHVWIGDCICQVTAVDVHGKEIMRMRFKKGAVLPIPNLVKVKLGENDTENLSSTISAAPSR	219	Viruses; Varidnaviria; Bamfordvirae; Nucleocytoviricota; Pokkesviricetes; Chitovirales; Poxviridae; Chordopoxvirinae; Orthopoxvirus; Vaccinia virus
6EA6_A	6EA6_A		Chain A, Protein B2	Vaccinia virus WR	SXAXFYAHALGGYDENLHAFPGISSTVANDVRKYSVVSVYNNKYDIVKDKYXWCYSQVNKRYIGALLPXFECNEYLQIGDPIHDQEGNQISIITYRHKNYYALSGIGYESLDLCLEGVGIHHHVLETGNAVYGKVQHDYSTIKEKAKEXNALSPGPIIDYHVWIGDCICQVTAVDVHGKEIXRXRFKKGAVLPIPNLVKVKLGENDTENLSSTISAAPSR	220	Viruses; Varidnaviria; Bamfordvirae; Nucleocytoviricota; Pokkesviricetes; Chitovirales; Poxviridae; Chordopoxvirinae; Orthopoxvirus; Vaccinia virus
6EA8_A	6EA8_A		Chain A, Protein B2	Vaccinia virus WR	SMAMFYAHALGGYDENLHAFPGISSTVANDVRKYSVVSVYNNKYDIVKDKYMWCYSQVNKRYIGALLPMFECNEYLQIGDPIHDQEGNQISIITYRHKNYYALSGIGYESLDLCLEGVGIHHHVLETGNAVYGKVQHDYSTIKEKAKEMNALSPGPIIDYHVWIGDCICQVTAVDVHGKEIMRMRFKKGAVLPIPNLVKVKLGENDTENLSSTISAAPSR	220	Viruses; Varidnaviria; Bamfordvirae; Nucleocytoviricota; Pokkesviricetes; Chitovirales; Poxviridae; Chordopoxvirinae; Orthopoxvirus; Vaccinia virus
YP_009480542	YP_009480542.1		schlafen-like protein [Sea otter poxvirus]	Sea otter poxvirus	MISKYKNKHDIIIMTNTEKKFYPHFLRNSHHENLYSFPCIYANKAIDVTKFKDVVVNNKKYSVSDDCIWSYSYVGHRYYGGFLPYFTISDTDIKPKVGTIIYNTDGDEISCVTDSVGNMHTISGIGYDALDVDTSGIDVHHCIVEDGNCVYGIKQDKDYIIKQYADKKNSLSNTAITSLNVWFCKKSTQLTATYSNGKEAMRIRIKRCGILTGDYYEVDK	220	Viruses; Varidnaviria; Bamfordvirae; Nucleocytoviricota; Pokkesviricetes; Chitovirales; Poxviridae; Chordopoxvirinae; unclassified Chordopoxvirinae
YP_874245	YP_874245.1	EoNPV	p26-b [Ectropis obliqua nucleopolyhedrovirus]	Ectropis obliqua nucleopolyhedrovirus	MYINVKNVMCKVDFVQKRVNCESYNGVPLLVHIFKQYDASAEWQNLHQYPGLASSMVLPKIAASSCVQIVKFDVGTTGFTTTIHALDVKLYYVHHRYGKHFVYGLVPAIVSLQNDLELYTGAPIFNNKNNLISFVTDSFLSDINELIVPVTSESHRMQGMFCVTGCVKVFSKDDDIVDLNNGHINIFVKQWPKYVEIFVMYNGFTMSYVKLVCKFAANVLIV	222	Viruses; Baculoviridae; Alphabaculovirus
YP_006607809	YP_006607809.1		p26-b [Apocheima cinerarium nucleopolyhedrovirus]	Apocheima cinerarium nucleopolyhedrovirus	MFEINVKNVLIKVDFELKRVFCVEHNGRPLVAHVYGSHDMQPELQCLYQYPSLATSMKLPKTNAENVVQLIEFNKNKKFKLVKAKLDTKLYYVHHHYGKYYMYGQVPAVVTFDSKLYNSFIGSPIFDEQDNVISFVTDCYMDDIGQRILPVTGESYRLHGMICLNGTIRIYGEDDVVQDVFDTNININIIYKKKTVEVYVMYNGETISYVKIKSKFAGNVLIV	223	Viruses; Baculoviridae; Alphabaculovirus; unclassified Alphabaculovirus
YP_008378276	YP_008378276.1		p26-b [Hemileuca sp. nucleopolyhedrovirus]	Hemileuca sp. nucleopolyhedrovirus	MESFIVNNVQFKVNFILQRVYCERYNGKKMFVHIFGDYNAHLKLESLFQYPGLATNVKLPKLNSNETVKLVTFDPIERHIKFVECRLDTKLYFAHHRYGKYYVYGQVPVVVKDRCDHIDIFTGAPIFDADDNLVSFMTDSFINNDNVQLIPVSGKSYRLQGMFCIDGVIRLYDENEIVRPIVSDHIDINVQYTKKYVEIQLIYKGNILSQLKIQCKFAGNVLIM	224	Viruses; Baculoviridae; Alphabaculovirus; Hemileuca species nucleopolyhedrovirus
YP_009179220 - Poxin-like	YP_009179220.1		polyprotein [Xingshan cricket virus]	Xingshan cricket virus	CKKATPFSGMLHGVKWVAKADHNQVEGNCGATHCGAPESVDKMHCLPDVYTDGELLKLRLVTTLRSVTVPVSSTCVKVFPVTGSVVTHGRIGSHRYGFSKVPSFDCDDVLVSGTPIFDTETGELVSVVSTSVNGRTYAITNLAYDSLDFELTGPVTLAELDKPSYGSHYGDYAEIKAKALVGDAGGDGLYINLDKNRMKAEVVSRGRSVFCTRRFGGGACWTNEQH	226	Viruses; Riboviria; unclassified Riboviria; unclassified ssRNA viruses; unclassified ssRNA positive-strand viruses
BAM78287 - Poxin-like_Cterm	BAM78287.1		hypothetical polyprotein [Gentian Kobu-sho-associated virus]	Gentian Kobu-sho-associated virus	KQHNSQEPFDGRAHRISWYAGQNSNIMDDFRCIHTEEGAIASRRWHRNGCDILSREEMPQLDLEDFIEVAVAPDQLTRFKITGTVVVPNVEHGVLYLNEYHSFTHVGDDLVSGTPIFQDGRVVSLITNSVSGQEYAIMTNSPINSKQFGVGRLDLSDGFIIYELPLERVLSIQELSIFQRETGEVPYESFICDTLRGMMLTRFGRSGLAIAQDQLAPSDQWADQKHS	227	Viruses; Riboviria; dsRNA viruses
BAM78287 - Poxin-like_Nterm	BAM78287.1		hypothetical polyprotein [Gentian Kobu-sho-associated virus]	Gentian Kobu-sho-associated virus	FRQQSAIAIKAHNTPNKGWEDTYGEVSWTTNGKANFLGLTRAIHTCRNEIDSSWMRVGHDLATKVDLMKIDLDSAVCVPLSGSTCGRFAISLTISSGGRKYPAFFCESELVSGTPIMQNGQVVSVVTTSNARGLYTIMCDVSEWELQQGIPETIWFSPELAEPVTYKATRDLWMNGERAEYQPRPISECSVNIRMSSAMRRLAMKQHNSQEPFDGRAHRISWYAGQN	227	Viruses; Riboviria; dsRNA viruses
BBE27868 - Poxin-like_Cterm	BBE27868.1		hypothetical polyprotein [Gentian Kobu-sho-associated virus]	Gentian Kobu-sho-associated virus	KQHNSQEPFDGRAHRISWYAGQNSNIMDDFRCIHTEEGAIASRRWHRSGCDILSREEMPHLDLEDFIEVAVAPNQLMRFNITGTVVVPNVEHGVLYLNEYHSFTHVGDDLVSGTPIFQDGRVVSLVTNSVSGLEYAIMTNSPINSKQFGVGKLDLYDGFIVYELPLERVLSVQELSVFHRVTDEVPYESFICDTLHGMMLTRFGRSGLAIAQDQLVPSDQWADQKHS	227	Viruses; Riboviria; dsRNA viruses
BBE27868 - Poxin-like_Nterm	BBE27868.1		hypothetical polyprotein [Gentian Kobu-sho-associated virus]	Gentian Kobu-sho-associated virus	FKQQSAIAIRAHNTPNKGWEDTYGEVSWTTNGKANFLGLTRAIHTCRGEIDSSWMKVGHDLATKVNLPKIDLNHHVYVPLSGGTCGRFAISSSISSGGRKYPAFFCESELVSGTPIIQNGQVVSVVTTSDARGLYTIMCEISERDLPQGIPEKIWFSPELAEPVVYKATRDLWMNEEEEVYHPRPISECTANIRVSTTMRRLAVKQHNSQEPFDGRAHRISWYAGQN	227	Viruses; Riboviria; dsRNA viruses
YP_007438864 - Poxin-like_Cterm	YP_007438864.1		hypothetical polyprotein [Gentian Kobu-sho-associated virus]	Gentian Kobu-sho-associated virus	KQHNSQEPFDGRAHRISWYAGQNSNIMDDFRCIHTEEGAIASRRWHRSGCDILSREEMPHLDLEDFIEVAVASNQLMRFKITGTVVVPNVEHGVLYLNEYHSFTHVGDDLVSGTPIFQDGRVVSLVTNSVNGLEYAIMTNSPINSKQFGVGKLDLYDGFIVYELPLERVLSVQELSVFHRVTDEVPYESFICDTLHGMMLTRFGRSGLAIAQDQLVPSDQWADQKHS	227	Viruses; Riboviria; dsRNA viruses
YP_007438864 - Poxin-like_Nterm	YP_007438864.1		hypothetical polyprotein [Gentian Kobu-sho-associated virus]	Gentian Kobu-sho-associated virus	FRQQSAIAIKAHNTPNKGWEDTYGEVSWTTNGKANFLGLTRAIHTCRSEIDSSWMKVGHDLATKVSLPKIDLNHYVYVPLSGSTCGRFAISSTISSGGRKYPAFFCESELVSGTPIMQNGQVVSVVTTSDARGLYTIMCEIPERDLPQGIPEKIWFSPELAEPVVYKATRDLWMNEEEEVYHPRPISECTANIRVSTTMRRLAVKQHNSQEPFDGRAHRISWYAGQN	227	Viruses; Riboviria; dsRNA viruses
QBP37018 - Poxin-like	QBP37018.1		putative polyprotein [Lampyris noctiluca flavivirus 1]	Lampyris noctiluca flavivirus 1	HQHKKIKHLQTIISKNDQLKVTERKNGTKKWREITRDGKVVITTKHCHTAGTLTENCIDIITNIPLGPITESVMVEGAIYLANRKVLMKKMSGETADFKVVKAFDAGRSFISGTPIYNSEGQICSVITQSCEGRWAIEQQEGTRIEGLWRKSVNAQYERCMRSLENSFIRDTELLSIHDRLLPICNQEHKTDTLPTIVTIMLALSGAFAARLGMMERITTQPATSTQ	227	Viruses; Riboviria; Orthornavirae; Kitrinoviricota; Flasuviricetes; Amarillovirales; Flaviviridae
YP_009175071 - Poxin-like	YP_009175071.1	MeV-1	polyprotein [Macrosiphum euphorbiae virus 1]	Macrosiphum euphorbiae virus 1	DEYWMEHFKTLNVGVEPNISYAQAKKDVKRTRVATAHLVKGEVAHSRPDLVGPVEGLAKVTGKISIFNFATKVRISRYLNDAEDNMVVSSKCGDKHVVGEVRTFGSSTRLASGSPIYNAVGRVCSLVTYSDGNGRYAVAAECTPSKTYVCSGLGCQYCKVESLLEKHSGKGKKKRPNKNKGGSSSLAVMQKNMNQAAKEAAELTQLKLRAEKQQQDVAEITQRMSQL	227	Viruses; Riboviria; Orthornavirae; Kitrinoviricota; Flasuviricetes; Amarillovirales; Flaviviridae
YP_009388303 - Poxin-like	YP_009388303.1		polyprotein [Apis flavivirus]	Apis flavivirus	PKHIESCPLAGGFTINTNQDGKQFVSSSDYVCMHSVCPDYPTIGKVLVNDIISSRPLARLTETISVGLPIGKCSEEHVYQLTGKRIAYTTRFQGKQYCGKYNSFHSERQYISGTPIFNSHGQICSIITSRQGDNYTVVNETKRVAPPSIRRPLIVFTSLLLLPVIATSLATPVANKIKATDLPPEIVAVDFSRDAERVKAKVHLIQEYKKTRSEDSAKEYMTKYQQD	227	Viruses; Riboviria; Orthornavirae; Kitrinoviricota; Flasuviricetes; Amarillovirales; Flaviviridae
BBV14763 - Poxin-like	BBV14763.1		polyprotein [Barley aphid RNA virus 10]	Barley aphid RNA virus 10	VTFTDDFWMDYFAHGLPLNISYEYPRNLNRCAKRLGLKARHLLREKPEAILDIVGPISKLSEPTERVYVISDTDEIIPCSLSTRVMPVSVTVGDHHQSSNLRSFRYDGNLKSGSPIFNATMQVCSIVTASKDGEYVLQHKHSTVEEYPCLGEHCTHCKIERELIWHDPKNNAKPKRKAQRPKRKQNNAQKVANATGNAVELRLRTEQQQIGIAEVTNRLKQIEINSR	227	Viruses; Riboviria; unclassified Riboviria
YP_009179218 - Poxin-like	YP_009179218.1		polyprotein [Sanxia water strider virus 6]	Sanxia water strider virus 6	GQFGNVQSTVSYTSEGKTYVENTNSNIHTRPVHSCSQNELNELIQTHETIGDVLVKGSFSLNFDNDIYLYDDDMNFLKFPLSKFKFYSGYNNSSFTNYRLSESFVFNHNIVSGTPLFNKEKQIVSIITTSKSINGNTYYAVTTKNDQYVTIRHDSYKWQVEGTVFKGIKGVNKIEFDMNDTCMYDKTHVSTPFSGERGPVSWQVKTSKDSPYIEVVTPDVIMPLHSL	227	Viruses; Riboviria; unclassified Riboviria; unclassified ssRNA viruses; unclassified ssRNA positive-strand viruses
YP_009179223 - Poxin-like	YP_009179223.1		polyprotein [Shuangao lacewing virus 2]	Shuangao lacewing virus 2	MEDIPIDPSFVKYCKGDSFCYVKRDAKGKLIIAPVHSLTPDDAAEMKNRSINYVDAFANVPFAPITPNVYVGARGGKMFNVCTNLKVLTGFDGIEVLVGTMRYITYPKNLVSGTPVFNQQGDLCSIVTSSDESDYALTGFDYVNSRFLCDKYEEKTATSNFIYGQRCFNDKASLLNYIKQVENNPPTMHWTVVNWTRLDGTLHTTYVNNLKQYSAVNWHLRPFWQAH	227	Viruses; Riboviria; unclassified Riboviria; unclassified ssRNA viruses; unclassified ssRNA positive-strand viruses
YP_009179224 - Poxin-like_Cterm	YP_009179224.1		polyprotein [Gamboa mosquito virus]	Gamboa mosquito virus	VPFEGIVYDTSFTIGENGNKSFIQGVSPKYDTIHSLSEEHISEWTATQNYADIYIDQNFARLSTNMVMAYWPNHQFTMYTISQITRNLVSSNAQNSLNFELAPTFNSADSLISGAPIFNNSKLHSVVTNKSGNDYALVQGTDYCGHFDGKFTLSSTQDALFISDSEANKFASFFYKLPKAMMTFNIDGLQYLSGRGRGRPRGRGGRGAANVRNTVAQKTIDTIVKDV	227	Viruses; Riboviria; unclassified Riboviria; unclassified ssRNA viruses; unclassified ssRNA positive-strand viruses
YP_009179224 - Poxin-like_Nterm	YP_009179224.1		polyprotein [Gamboa mosquito virus]	Gamboa mosquito virus	DISAHGVTAKINFTDDMVPYYTIPQYKIELFQFLPDEIKKQRHNASVRYNGFFAEVVLPGEIGFSVKIMLPDGVSKEFDVMYDASKILESNDGVTHYIQMCPVFRCKDELLPGTPIFDTNNKLISVVTSKMDDFYHVAVFNQCLVEITDKYEAKYHNNKITISKNGKEVGFIRPGFKLLAKQMFQPVSMIASTDPGDDSGEDVPPPVPTPPAHSLHMVPFEGIVYDT	227	Viruses; Riboviria; unclassified Riboviria; unclassified ssRNA viruses; unclassified ssRNA positive-strand viruses
YP_717599	YP_717599.1		P26 [Clanis bilineata nucleopolyhedrovirus]	Clanis bilineata nucleopolyhedrovirus	MALAQDSSIHIVNHAVFAVDHNFKRVHMISYKDEAVTTNVFLGYDITPSYESLNHYPNLVTSLTLPKLKPKALLKIPLLDDNRRLKMVNVKLSSQLYFAHHHYAKYYVYGLIPAVVLSLNSSIKNHLYTGMPIFNSKNQLVSFVTDCHIEKKCVVLVTGETHRVGGMFCIDGCVRLLVNEEILHLPPFDCIDVHVRYTKKKVRIYLVYNNQVLSNVDINALFAGNVLIR	229	Viruses; Baculoviridae; Alphabaculovirus
NP_046288	NP_046288.1		p26 [Orgyia pseudotsugata multiple nucleopolyhedrovirus]	Orgyia pseudotsugata multiple nucleopolyhedrovirus	MYIKMEVEFDEDTGALQIGGQEVFVMVFEPGQEVFDKSLDQHHQFPGVATSVVFPQLSIGTKVDVFTSSGGFGATDHHCFNYHVCNKRFVFGSVPALEIPADVREHLRIGAPITCADRLVSLVTAVHAADGAWLLRVTAARAGQVSGHARQQRRGAGRTVRAGRSVYGPVQLPYEQLKAHAFRKRRPRRDAAESCALFYNDSEVRITFNKGEFELMHWRLPGPLVSHGFK	230	Viruses; Baculoviridae; Alphabaculovirus
YP_001650972	YP_001650972.1		p26-b [Orgyia leucostigma nucleopolyhedrovirus]	Orgyia leucostigma nucleopolyhedrovirus	MQRYTINGVSFSVDFTINRVFCHKYNNNNLIAHVYGIHDDQPGLDALHQYPGLACSIKLPKINAKTEVCFVCFDSHKRLRLVKARLDTKLYFAHHHYGKYYVYGQVPAVVEFDVARAADLFVGAPVFDAVRRRLVSFVTNCHFSDNASERQKQLIVPVTGESYRLQGMFCINGGVRLYGENEVVDAGVRSDININVKYTKKQVDVFVVYNGEIISRVTVKSKFTGNVLIV	230	Viruses; Baculoviridae; Alphabaculovirus
YP_009001829	YP_009001829.1		P26 [Buzura suppressaria nucleopolyhedrovirus]	Buzura suppressaria nucleopolyhedrovirus	MKTFNINNVMLKVDFNLKRAYCESYKNKHLAVHVYGQHDYLSETSTFYQYPGIACNIKLPKLNSTSIVKLIEFKSNDSYKIITKRLDKKLYYVHHHYAKYYVYGLVPGVVLKNDDLCKLNVFNCYIGSPVFDKNDRLVSFVTDYYYMNENNIGIMPITGESYRMQGMFCLDGAVRVFDTLSFEPAAIAAEPTINIIVGYNKKHVKIAVVYNGSVVSELLIACQYAGNILIL	231	Viruses; Baculoviridae; Alphabaculovirus
YP_473209	YP_473209.1		P26 [Hyphantria cunea nucleopolyhedrovirus]	Hyphantria cunea nucleopolyhedrovirus	MHVQMEVKFDEDTGSLQMNDRNVFVKVFEPGQEVFDETLNQYHQFPGVATDIVFPQLSLGLTVDVFTSSGTYSGTLTTTCFNYHVCNKRFVFGVLPALEVSKEVRDHLCIGAPITCDDRLVSVVTTMYERADGVWLVPVTGVRESGQVSGHAHVRNGVRAERLRAGRSVYGTVQLPYDQLKAYALSQTAPRGEATESCMLFYNDSEVRITFNRNAFELMHWRLPGPFVVRSV	232	Viruses; Baculoviridae; Alphabaculovirus
AUR45051	AUR45051.1		P26 protein [Spilosoma obliqua nucleopolyhedrosis virus]	Spilosoma obliqua nucleopolyhedrosis virus	MHVQMEVKFDEDTGSLQMNDRNVFVKVFEPGQEVFDETLNQYHQFPGVATDIVFPQLSLGLTVDVFTSSGTYSGTLTTTCFNYHVCNKRFVFGVVPALEVSKEVRDHLCIGAPITCDDRLVSVVTTMYERADGVWLVPVTGVRESGQVSGHAHVRNGVRAERLRAGRSVYGTVQLPYDQLKAYALSQTAPRGEATESCMLFYNDSEVRITFNRNAFELMHWRLPGPFVVRSV	232	Viruses; Baculoviridae; Alphabaculovirus; unclassified Alphabaculovirus
AWW14419	AWW14419.1		p26 [Hyposidra talaca NPV]	Hyposidra talaca NPV	MKTFTINNVVFKVNFDLKRVYCELYNNESLAVHVYGQHDYLFESSALYQYPGIACNIKLPKLNSASTIQLIEFQGNDTYKMVTKRLDNKLYYVHHHYAKYYVYGQVPGVVLTDSDSPKLNAFNCYIGSPIFDDRNRLVSFVTDYYFPNENGITAVMPITGESYRMQGVFCLDGGVRVFDTLSLNTTTVAAEPTINILVGHNGKHVKIAVVYNGSVVSELLITCKYAGNVLIV	232	Viruses; Baculoviridae; Alphabaculovirus; unclassified Alphabaculovirus
AGR56910	AGR56910.1		P26B [Choristoneura occidentalis alphabaculovirus]	Choristoneura occidentalis alphabaculovirus	MYVKMDVIYDENTGSLQMGDKNVFIKVLEPGQEVFDETLNQYHQFPGVVTSIVFPQLLTGTTVDVFTASGAYSGPLTTTCFNYHVCNKRFVFGTVPALEVPDEVRNHLHIGAPITCDDKLVSVVTTVFRRADGVWLLPVTGVRQADQVSGHAFVQNGVRAERLGTGRSVYGTVQLPYDKLKAHALSQTAPQAEASESCALFYNDAEVRITFNKGSFELMHWRLPGPFVGHNVK	233	Viruses; Baculoviridae; Alphabaculovirus
AKR14102	AKR14102.1		p26 [Dasychira pudibunda nucleopolyhedrovirus]	Dasychira pudibunda nucleopolyhedrovirus	MYIKMEVEFDEDTGALQIGGQEVFVKVFEPGQEVFDKSLDQHHQFPGVATSVVFPQLSIGTTVDVFTSSGTYSGPLTTTCFNYHVCNKRFVFGSVPALEIPADVREHLRIGAPITCADRLVSVVTAVHRRADGAWLLPVTGVREPGQVSGHAHVSNGVRAERLRAGRSVYGPVQLPYEQLKAHALSQTAPRADAAESCALFYNDFEVRITFNKGEFELMHWRLPGPLVSHGFK	233	Viruses; Baculoviridae; Alphabaculovirus
NP_848439	NP_848439.1		p26 [Choristoneura fumiferana multiple nucleopolyhedrovirus]	Choristoneura fumiferana multiple nucleopolyhedrovirus	MYVKMDVIYDENTGSLQMGDKNVFIKVLEPGQEVFDETLNQYHQFPGVVTSIVFPQLLTGTTVDVFTASGAYSGTLTTTCFNYHVCNKRFVFGTVPALEVPDEVRNHLHVGAPITCDDKLVSVVTTVFRRADGVWLLPVTGVRQADQVSGHAFVQNGVRAERLGTGRSVYGTVQLPYDKLKAHALSQTAPQAEASESCALFYNDAEVRITFNKGSFELMHWRLPGPFAGHNVK	233	Viruses; Baculoviridae; Alphabaculovirus
YP_008378375	YP_008378375.1		P26B [Choristoneura rosaceana nucleopolyhedrovirus]	Choristoneura rosaceana nucleopolyhedrovirus	MYIKMDVIFDEDSGCLQIGDQNVFIKVLEPGQEVFDETLNQYHQFPGVITSVVFPQLSMGTTVDVFTTIGTYSGTLVTTCFNYHVCNKRFVFGTVPALEVADDMRNHLHVGAPITCDDRLVSVVTTVFRRADGVWLLPVTGVRQSGQVSGHAYVRNGVRVERLSAGRSVYGAVQLPYDKLKTHALSQTAPQAEGSESCALFYNDSEVRITFNKGSFELMHWRLPGPFAGHSVK	233	Viruses; Baculoviridae; Alphabaculovirus
YP_008992114	YP_008992114.1		p26 [Choristoneura murinana nucleopolyhedrovirus]	Choristoneura murinana nucleopolyhedrovirus	MYVKMDVIFDEDTGSLQMGDQNVFIQVLKPGQEVFDETLNQYHQFPGVVTSVVFPQLFMGTTVDVFMTSGAYSGALTTTCFNYHVCNKRFVFGTVPALELPDEVRNHLHVGAPITCDGRLVSVVTTVFRRADGVWLLPVTGVRQSGQVSGHAHVRNGVRAERLSAGRSVYGTVQLPYDKLKAHALLQTAPHAEAPESCALFYNDSEVRITFNKGSFELMHWRLPGPFVGHSVK	233	Viruses; Baculoviridae; Alphabaculovirus
BBU37501	BBU37501.1		P26 protein [Choristoneura diversana nucleopolyhedrovirus]	Choristoneura diversana nucleopolyhedrovirus	MYVKMDVIFDEDTGSLQMGDQNVFIQVLKPGQEVFDDTLNQYHQFPGVVTSVVFPQLSMGTTVDVFMTSGAYSGALTTTCFNYHVCNKRFVFGTVPALELPDEVRNHLHVGAPITCDGRLVSVVTTVFRRADGVWLLPVTGVRQSGQVSGHAHVRNGVRAERLSAGRSVYGTVQLPYDKLKAHALLQTAPHAEAPESCALFYNDSEVRITFNKGSFELMHWRLPGPFVGHSVK	233	Viruses; Baculoviridae; Alphabaculovirus; unclassified Alphabaculovirus
QEI03645	QEI03645.1		P26A [Rachiplusia nu nucleopolyhedrovirus]	Rachiplusia nu nucleopolyhedrovirus	MQVTRVNGKSVHIEVIEPHGETNGRDSLSLLHQFPGVASEVIFPPIEKEDSSLYVLLSNGVLALVKPTRIYTNFHKHQGRFIYGQLRTFVVDDFSLAEKIYIGAPIFFNKKLVSVVTCRYDDYDAGLVMFPVSGIRPPGLVSGQFHYDNNVLVSSLKSNMSVYGKHQLLYQSKYMNVKKFALTAAANRLSYRDLPRSVSVFHNAREIIITLTEGEFEIDRVRFDGPMVIPQHG	233	Viruses; Baculoviridae; Alphabaculovirus; unclassified Alphabaculovirus
BBQ05092 - Poxin-like	BBQ05092.1		polyprotein, partial [Culex tritaeniorhynchus flavi-like virus]	Culex tritaeniorhynchus flavi-like virus	IEKGSAIPYGLYEKKVKHAFEFVNLDSSLIPNGYNVITDRGRIQVVSEHSRCNHDENGVCIGKADVEVTETIMATGDRIKVMGQSYDVDRKVLAWYKVDNVIHYQVCSGFYSDKYFVTGTPIFNETDQLVSVISSSTDNIYSIVRVDRKFDRFVSNKTEYWSRLMAIASELKTVLMVNFHSTRKAQQASNNASALAEARVFSAVAAGHMASVKSSVEAINDLQKIAEQKVAKA	233	Viruses; Riboviria; Orthornavirae; Kitrinoviricota; Flasuviricetes; Amarillovirales; Flaviviridae
ANW12286	ANW12286.1		p26 [Malacosoma sp. alphabaculovirus]	Malacosoma sp. alphabaculovirus	MAANNIFNLTITKLNSVVFSVNHLTQQVQVLTYKNEPVTFHLFGQHIGSSVNLDDKFQYPGLASSIKLPVLNRYKPLKMVVFDENNQMRVEEVKMEEKMYFAHHHYEQYYVYGQVPVVLKNNMRNKDLKVYIGSPIFNHKNALVSVVSDIYLDNQNNVIFPVSGQAGGVQGTYCLDGSVWLTHSEDSLSSFPKFSTLDLHVCYDDKNIYLYLVYEGRVLSWIKIKGRFAGNVLIC	235	Viruses; Baculoviridae; Alphabaculovirus; unclassified Alphabaculovirus
YP_009552185	YP_009552185.1		p26 [Malacosoma neustria nucleopolyhedrovirus]	Malacosoma neustria nucleopolyhedrovirus	MAANNMFNLTITKLNSVVFSVNHLTQQVQVLTYKNVPVTFHLFGQHIGSSVNLDDKFQYPGLASSIKLPVLNRYKPLKMVVFDENNQLKVEEVKMEEKMYFAHHHYEQYYVYGHVPVVLKNNMRNKDLKVYIGSPIFNHKNALVSVVSDIYLDNQNNVIFPVSGQAGGVQGTFCLDGSVWLTHSEDLLSSFPKFSTLDLHVCYDERNVYLYLVYEGKVLSWIKIKGRFAGNVLIC	235	Viruses; Baculoviridae; Alphabaculovirus; unclassified Alphabaculovirus
BBD51086	BBD51086.1		P26 [Samia ricini nucleopolyhedrovirus]	Samia ricini nucleopolyhedrovirus	MDNKMYVRMEIKFDEDTGRLQIGDRDVFVRVFEPGQEVFDETLDQYHQFPGVATDVVFPQVDTGATVSVHTAAGAYSGPLTASCFNYHVCNKRFVFGVLPALEVPADVSPHLRVGAPILCNEQLVSVVTAVHERADGVWLVPVTGVRGPHQVSGHARVCNGVRAERLRAGRSVYGAVQLPYDKLKTHALSQTEASESCALFYNDSEVRITFNKGSFELMHWRLPGPFVATALNKHY	236	Viruses; Baculoviridae
AFY62829	AFY62829.1		P26 [Philosamia cynthia ricini nucleopolyhedrovirus virus]	Philosamia cynthia ricini nucleopolyhedrovirus virus	MDNKMYVRMEIKFDEDTGRLQIGDRDVFVRVFEPGQEVFDETLDQYHQFPGVATDVVFPQVDTGATVSVHTAAGAYSGPLTASCFNYHVCNKRFVFGVLPALEVPADVRPHLRVGAPILYNEQLVSVVTAVHERADGVWLVPVTGVRGPHQVSEHARVCNGVRAERLRAGRSVYGAVQLPYDKLKTHALSQTEASESCALFYNDSEVRITFNKGSFELMHWRLPGPFVATALNKHY	236	Viruses; Baculoviridae; Alphabaculovirus
ALR69832	ALR69832.1		p26 [Anticarsia gemmatalis multiple nucleopolyhedrovirus]	Anticarsia gemmatalis multiple nucleopolyhedrovirus	MDNKMYVRMEIKFDEDTGRLQIGDRDVFVRVFEPGQEVFDETLDQYHQFPGVATDVVFPQLTTGATVSVHTAIGPYSGPLTVSCFNYHVCNKRFVFGVLPALEVPADVHPHLRLGAPILCGEQLVSVVTAVYERADGVWLVPVTGVREAHQVSGHARVCNGVRAERLRDGRSVYGTVQLPYNEVKAYALSQSTPAADARESCALFYNDSEVRITFSKGEFEQMHWRLPGPFVGRLV	236	Viruses; Baculoviridae; Alphabaculovirus
ALR70147	ALR70147.1		p26 [Anticarsia gemmatalis multiple nucleopolyhedrovirus]	Anticarsia gemmatalis multiple nucleopolyhedrovirus	MDNKMYVRMEIKFDEDTGRLQIGDRDVFVRVFEPGQEVFDETLDQYHQFPGVATDVVFPQLTTGATVSVHTAIGPYSGPLTVSCFNYHVCNKRFVFGVLPALEVPADVRPHLRLGAPILCDDQLVSVVTAVYERADGVWLVPVTGVRETHQVSGHARVCNGVRAERLRDGRSVYGTVQLPYNEVKAYALSQSTPAADARESCALFYNDSEVRITFSKGEFEQMHWRLPGPFVGRLG	236	Viruses; Baculoviridae; Alphabaculovirus
ALR70774	ALR70774.1		p26 [Anticarsia gemmatalis multiple nucleopolyhedrovirus]	Anticarsia gemmatalis multiple nucleopolyhedrovirus	MDNKMYVRMEIKFDEDTGRLQIGDRDVFVRVFEPGQEVFDETLDQYHQFPGVATDVVFPQLTTGATVSVHTAIGPYSGPLTVSCFNYHVCNKRFVFGVMPALEVPADVHPHLRLGAPILCGEQLVSVVTAVYERADGVWLVPVTGVREAHQVSGHARVCNGVRAERLRDGRSVYGTVQLPYNEVKAYALSQSTPAADARESCALFYNDSEVRITFSKGEFEQMHWRLPGPFVGRLV	236	Viruses; Baculoviridae; Alphabaculovirus
NP_932739	NP_932739.1	CfDEFNPV	hypothetical protein CFDNVgORF130 [Choristoneura fumiferana DEF multiple nucleopolyhedrovirus]	Choristoneura fumiferana DEF multiple nucleopolyhedrovirus	MDNKMYVRMEIKFDEDTGRLQIGDRDVFVRVFEPGQEVFDDSLNQYHQFPGVATDVVFPQLATGATVSVHTAAGAYTGSLTASCFNYHVCNKRFVFGVLQALEVPADVRPHLRLGAPILCDDQLVSVVTAVHKRADGVWLVPVTGVRGAHQVSGHARVRNGVRAERLCAGRSVYGTVQLPYDELKAYALSQSTPPADAQESCALFYNDSEVRITFNKGDFEQMHWRLPGPFVGRLV	236	Viruses; Baculoviridae; Alphabaculovirus
YP_009316042	YP_009316042.1		p26 [Anticarsia gemmatalis multiple nucleopolyhedrovirus]	Anticarsia gemmatalis multiple nucleopolyhedrovirus	MDNKMYVRMEIKFDEDTGRLQIGDRDVFVRVFEPGQEVFDETLDQYHQFPGVATDVVFPQLTTGATVSVHTAIGPYSGPLTVSCFNYHVCNKRFVFGVLPALEVPADVRPHLRLGAPILCDDQLVSVVTAVYERADGVWLVPVTGVRETHQVSGHARVCNGVRAERLRDGRSVYGTVQLPYNEVKAYALSQSTPAADARESCALFYNDSEVRITFSKGEFEQMHWRLPGPFVGRLV	236	Viruses; Baculoviridae; Alphabaculovirus
YP_803526	YP_803526.1		p26 [Anticarsia gemmatalis nucleopolyhedrovirus]	Anticarsia gemmatalis nucleopolyhedrovirus	MDNKMYVRMEIKFDEDTGRLQIGDRDVFVRVFEPGQEVFDETLDQYHQFPGVATDVVFPQLTTGATVSVHTAIGPYSGPLTVSCFNYHVCNKRFVFGVMPALEVPADVHPHLRLGAPILCGEQLVSVVTAVYERADGVWLVPVTGVREAHQVSGHARVCNGVRAERLRDGRSVYGTVQLPYNKVKAYALSQSTPAADARESCALFYNDSEVRITFSKGEFEQMHWRLPGPFVGRLV	236	Viruses; Baculoviridae; Alphabaculovirus; unclassified Alphabaculovirus
YP_009118504	YP_009118504.1	CoveMNPV	p26 [Condylorrhiza vestigialis MNPV]	Condylorrhiza vestigialis MNPV	MNNKMYVRMEVKFDEDTERLQINDRDVFVRVFEPGQEVFDDTLNQYHQFPGVATEIMFPQLAMGATVSVHTAVGAYTGPLTASCFNYHVCNKRFVFGVLPALEVPVDVCPHLRLGAPILCDDQLVSVVTAVHKRTDDVYLVPVTGVRESQQVSGHARVRNGVRVERLRAGRSVYGTVQLPYDQLKAYALSQSTPSADAQESCALFYNDSEVRITFNKGDFEEMHWRLPGPFVGRLD	236	Viruses; Baculoviridae; Alphabaculovirus; unclassified Alphabaculovirus
XP_013197314	XP_013197314.1		PREDICTED: uncharacterized protein LOC106140284 [Amyelois transitella]	Amyelois transitella	MSRTVRNEQYKGVVENFSIPAEIHERDGRKFASFGAVVPIHCCTSEEIAERAKTTHHYCDVFTEEKMAPLGELAYVRLDENTAEKVFINRSKKLLMVSSDGRIAQWRCAPSFESNNQFLAGTPVVNQDGALVTVVTAKKGNHYAVSTFEGEGGYFETSSLWHTIDLAEGRVAYGLHTFASREELRAHVSRLARAPAHGAPAPALFRARRPRVALVEAGGKQLAHIYLQPGIVSDVEYL	238	Eukaryota; Metazoa; Ecdysozoa; Arthropoda; Hexapoda; Insecta; Pterygota; Neoptera; Holometabola; Lepidoptera; Glossata; Ditrysia; Pyraloidea; Pyralidae; Phycitinae; Amyelois
QED40584	QED40584.1		P26B [Chrysodeixis includens nucleopolyhedrovirus]	Chrysodeixis includens nucleopolyhedrovirus	MVSREGDFVPSNTVTQFGNVAFIVDHVTKRVTILSYLNEPVKFHVFSQHDSDSELLKLKYHYPGLASSVALPKLTLRQKVKLLVFDKDKNLKLVSAELEEKLFFAHHHYAKYYNYGLVPVIIKNFEESLYSGAPVFDRTGKVLLSVVCDCYYPNENYCVVPLCGETSGSRGVISLDGHVWLSETGDNFDFSNSIKVKDRIDLYVSYDDRFVYLNLFYNNHIVTYIRIRGKFAGNVLIK	238	Viruses; Baculoviridae; Alphabaculovirus
QEI03606	QEI03606.1		P26B [Rachiplusia nu nucleopolyhedrovirus]	Rachiplusia nu nucleopolyhedrovirus	MALQVGDVVLSNSVTQFSSVAFTANHESRRVTIMSYLNEPVKFHIFGQHDNDPDLLKLKYHYPGLASSLRLPKLALRQTVSVLVFDKNNCLKLVKAELEEKLHFAHHHYAKYYTYGLVPVILKNFDEALYSGSPVFDETGTQLVSVICDWYFPKNDYCVIPLCGEMSGSRGVLCLDGYVWLNELGDNFDFSNSINSKNRIDLYVSYDKKFIYLNLYYNQCIITFIRIKAKFAGNVLIR	238	Viruses; Baculoviridae; Alphabaculovirus; unclassified Alphabaculovirus
AGE61772	AGE61772.1	ChchNPV	P26-2 protein [Chrysodeixis chalcites nucleopolyhedrovirus]	Chrysodeixis chalcites nucleopolyhedrovirus	MSIQTGDIVESNVVTQFNSVAFIVNHETRRVTIMSYKNEPVKFHVFNQHDNDPDLLKLQYHYPGLASSIELPKITHMSKVRIMVFDQRHRMIIVEEFLLEKLYFVHHHYAKYYVYGLVPVIAKNFKHNLYSGAPVFDETSKVLLSVVSDCYFSSTTDENCIIPLSGELSGSRGVLCLDGHVWLNESGDDFTFDKTNVANRIDLYVSHDKKFVYLNIFYNNNIINFIRVKAKFVGNVLIR	239	Viruses; Baculoviridae; Alphabaculovirus
YP_249667	YP_249667.1	ChchNPV	P26-2 [Chrysodeixis chalcites nucleopolyhedrovirus]	Chrysodeixis chalcites nucleopolyhedrovirus	MSIQTGDIVESNVVTQFNSVAFIVNHETRRVTIMSYKNEPVKFHVFNQHDNDPDLLKLQYHYPGLASSIELPKITHMSKVRIMVFDQRHRMIIVEEFLLEKLYFVHHHYAKYYVYGLVPVVAKNFKHNLYSGAPVFDETGKVLLSVVSDCYFSSTTDENCIIPLSGELSGSRGVLCLDGHVWLNESGDDFTFDKTNVANRIDLYVSHDKKFVYLNIFYNNNIINFIRVKAKFVGNVLIR	239	Viruses; Baculoviridae; Alphabaculovirus
YP_308949	YP_308949.1		orf59 [Trichoplusia ni single nucleopolyhedrovirus]	Trichoplusia ni single nucleopolyhedrovirus	MSIQTGETVESNVVTQFNSVAFLVNHETRRVTIMSYKNEPVKFHVFNQHDTDPDLLKLPYHYPGLASSIELPKITHMRKVRIMVFDQRHRMLLAEEFLLEKLYFVHHHYAKYYVYGLVPVVAKNFKHNLYSGAPVFDETGKVLLSVISDCYFSSTTEENCVIPLSGELSGSRGVLCLDGHVWLNETGDDFTFDKTNVPNRIDLYVSHNKKFVYLNIFYNNNIINFIRVKAKFVGNVLIR	239	Viruses; Baculoviridae; Alphabaculovirus
YP_009186747	YP_009186747.1		p26-2 [Sucra jujuba nucleopolyhedrovirus]	Sucra jujuba nucleopolyhedrovirus	MRIQVNSVSMNVNFETKMVYCDMYEGDALTVHLMAQPNISSTDVKLLHQYPGVACSTKLRRLNAGDKVKLLKFTANETFSLITTRLDRHLYFVHHRHGNLYMYGQVPAVVENQTKRKNVHAENCTTVQQHYYVGSPIFDQNNRLVSFVTDIYMDDRGISILPVTGKSRLQGRFCVTGHIRIFNDMCLTTCLNPVIQDQIYINIVVCYDNKQVKVMVIYNKTIVSEIHMCTKFAANVLIL	239	Viruses; Baculoviridae; Alphabaculovirus
XP_023942000	XP_023942000.1	squinting bush brown	uncharacterized protein LOC112048622 [Bicyclus anynana]	Bicyclus anynana	MSKRTVTNDVYKGLVEAFSIPAELHERDGKPFASVGSVLPIHCATPQQLAERAETTHHYCDVFTDEILAPLGELAYVRIDENVAEKVFLNRSKRILLISSDGKLAQWRCAPTFESANSFVAGAPIVNKDGALVSVVTARRGNNYAVSAFEGDGGYFATTKHWEVVELEDGKLYYADKSFSTREDLAAYLQALPPVEVNTEALPKPVLLNGKSPRIALVAENGRQLSHHYLCGVFSDVEYL	240	Eukaryota; Metazoa; Ecdysozoa; Arthropoda; Hexapoda; Insecta; Pterygota; Neoptera; Holometabola; Lepidoptera; Glossata; Ditrysia; Papilionoidea; Nymphalidae; Satyrinae; Satyrini; Mycalesina; Bicyclus
BBD51235	BBD51235.1		P26 [Samia ricini nucleopolyhedrovirus]	Samia ricini nucleopolyhedrovirus	MDNKMYVRMEIKFDEDTGRLQIGDRDVFVRVFEPGQEVFDETLDQYHQFPGVATDVVFPQVDTGATVSVHTAAGAYSGPLTASCFNYHVCNKRFVFGVLPALEVPADVRPHLRVGAPILYNEQLVSVVTAVHERADGAWLVPVTGVRGPHQVSGHARVCNGVRAERLRAGRSVYGAVQLPYDKLKTHALSQTAPHAEASESCALFYNDSEVRITFNKGSFELMHWRLPGPFVATALNKHY	240	Viruses; Baculoviridae
AAA87588	AAA87588.1		P26 [Bombyx mori nucleopolyhedrovirus]	Bombyx mori nucleopolyhedrovirus	MELYNIKYAIDPTNKNVIEQVDNVDAFVHILEPGQEVFDETLSRYHQFPGVVSSIIFPQLVLNTIISVLSEDGSLLPLKLENTCFNFHVCNKRFVFGNLPAAIVNNETKQKLRIGSPIFAGEKLVSVVTTFHRVGENEWLLPVTGIQEASRLSGHIKVPNGVRVEKLRPNMSVYGTVQLPYDKIKRHALEQENKTPNALESCVLFYKDSEIRITYNRGDYEIMHLRMPGPLIQPNTIYYS	240	Viruses; Baculoviridae; Alphabaculovirus
AAN28082	AAN28082.1		p26 [Rachiplusia ou MNPV]	Rachiplusia ou MNPV	MELYNIKYAIDLTNKIVIKQVDNVDAFVHILEPGQEVFDETLNQYHQFPGVVSSIIFPQLVLNTIISVLSEDGSLLTLKLENTCFNFHVCNKRFVFGNLPSAVVNNETKEKLRIGAPIFADEKLVSVVTAFHRVGENEWLLPVTGIREASQLSGHIKVLNGVRVEKWRPNMSVYGTVQLPYDKIKQHALEQENKTPNALESCVLFYKDSEIRITYNKGDYEIMHLRMSGPLIQPNTIYYS	240	Viruses; Baculoviridae; Alphabaculovirus
ABE68519	ABE68519.1		p26 [Plutella xylostella multiple nucleopolyhedrovirus]	Plutella xylostella multiple nucleopolyhedrovirus	MELYNIKYAIDPTNKIVIEQVDNVDAFVHILEPGQEVFDETLSQYHQFPGVVSSIIFPQLVLNTIISVLSEDGSLLTLKLENSCFNFHVCNKRFVFGNLPAAVVNNETKQKLRIGAPIFAGEKLVSVVTAFHRVGENEWLLPVTGIREASQLSGHMKVLNGVRVEKWRPNMSVYGTVQLPYDKIKQHALEQENKTPNALESCVLFYKDSEIRITYNKGDYEIMHLRMPGPLIQPNTIYYS	240	Viruses; Baculoviridae; Alphabaculovirus
ACQ57310	ACQ57310.1		P26 [Bombyx mandarina nucleopolyhedrovirus]	Bombyx mandarina nucleopolyhedrovirus	MELYNIKYAIDPTNKIVIEQVDNVDAFVHILEPGQEVFDETLSRYHQFPGVVSSIIFPQLVLNTIISVLSEDGSLLALKLENTCFNFHVCNKRFVFGNLPAAIVNNETKQKLRIGSPIFAGEKLVSVVTTFHRVGENEWLLPVTGIQEASRLSGHIKVPNGVRVEKLRPNMSVYGTVQLPYDKIKRYALEQENKTPNALESCVLFYRDSEIRITYNRGDYEIMHLRMPGPLIQPNTIYYS	240	Viruses; Baculoviridae; Alphabaculovirus
AFN09041	AFN09041.1		P26 [Bombyx mori nucleopolyhedrovirus]	Bombyx mori nucleopolyhedrovirus	MELYNIKYAIDPTNKIVIEQVDNVDAFVHILEPGQEVFDETLSRYHQFPGVVSSIIFPQLVLNTIISVLSEDGSLLPLKLENTCFNFHVCNKRFVFGNLPAAIVNNETKQKLRIGSPIFAGEKLVSVVTTFHRVGENEWLLPVTGIQEASRMSGHIKVPNGVRVEKLRPNMSVYGTVQLPYDKIKRHALEQENKTPNALESCVLFYKDSEIRITYNRGDYEIMHLRMPGPLIQPNTIYYS	240	Viruses; Baculoviridae; Alphabaculovirus
AFN21092	AFN21092.1		P26 [Bombyx mori nucleopolyhedrovirus]	Bombyx mori nucleopolyhedrovirus	MELYNIKYAIDPTNKIVIEQVDNVDAFVHILEPGQEVFDETLSRYHQFPGVVSSIIFPQLVLNTIISVLSEDGSLLALKLENTCFNFHVCNKRFVFGNLPAAIVNNETKQKLRIGSPIFAGEKLVSVVTTFHRVGENEWLLPVTGIQEASRLSGHIKVPNGVRVEKLRPNMSVYGTVQLPYDKIKRHALEQENKTPNALESCVLFYKDSEIRITYNRGDYEIMHLRMPGPLIQPNTIYYS	240	Viruses; Baculoviridae; Alphabaculovirus
AFN21230	AFN21230.1		P26 [Bombyx mori nucleopolyhedrovirus]	Bombyx mori nucleopolyhedrovirus	MELYNIKYAIDPTNKIVIEQVDNVDAFVHILEPGQEVFDETLSRYHQFPGVVSSIIFPQLVLNTIISVLSEDGSLLPLKLENTCFNFHVCNKRFVFGNLPAAIVNNETKQKLRIGSPIFAGEKLVSVVTTFHRVGENEWLLPVTGIQEASRLSGHIKVPNGVRVEKLRPNMSVYGTVQLPYDKIKRHALEQENKTPNALESCVLFYKDSEIRITYNRGDYEIMHLRMPGPLIQPNTIYYS	240	Viruses; Baculoviridae; Alphabaculovirus
AGX01339	AGX01339.1		P26 [Bombyx mori nucleopolyhedrovirus]	Bombyx mori nucleopolyhedrovirus	MELYNIKYAIDPTNKIVIEQVDNVDAFVHILEPGQEVFDETLSRYHQFPGVVSSIIFPQLVLNTIISVLSEDGSLLPLKLENTCFNFHVCNKRFVFGNLPAAIVNNETKQKLRIGSPIFAGEKLVSVVTTFHRVGENEWLLPVTGIQEASRLSGHIKVPNGVRVEKLRPNMSVYGTVQLPYDKIKRYALEQENKTPNALESCVLFYRDSEIRITYNRGDYEIMHLRMPGPLIQPNTIYYS	240	Viruses; Baculoviridae; Alphabaculovirus
AIS92852	AIS92852.1		P26 [Bombyx mori nucleopolyhedrovirus]	Bombyx mori nucleopolyhedrovirus	MELYNIKYAIDPTNKIVIEQVDNVDAFVHILEPGQEVFDETLSRYHQFPGVVSSIIFPQLVLNTIISVLSEDGSLLPLKLENTCFNFHVCNKRFVFGNLPAAIVNNETKQKLRIGSPIFAGEKLVSVVTTFHRVGENEWLLPVTGIQEASRLSGHIKVPNGVRVEKLRPNMSVYGTVQLPYDKIKRYALEQENKTPNVLESCVLFYRDSEIRITYNRGDYEIMHLRMPGPLIQPNTIYYS	240	Viruses; Baculoviridae; Alphabaculovirus
BBN66165	BBN66165.1		p26 [Bombyx mori nucleopolyhedrovirus]	Bombyx mori nucleopolyhedrovirus	MELYNIKYAIDPTNKIVIEQVDNVDAFVHILEPGQEVFDETLSRYHQFPGVVSSIIFPQLVLNTIISVLSEDGSLLPLKLENTCFNFHVCNKRFVFGNLPAAIVNNETKQKLRIGSPIFAGEKLVSVVTTFHRVGENEWLLPVTGIQEASRMSGHIKVPNGVRVEKLRPNMSVYGTVQLPYDKIKRHALEQENKTPNALESCVLFYRDSEIRITYNRGDYEIMHLRMPGPLIQPNTIYYS	240	Viruses; Baculoviridae; Alphabaculovirus
NP_047534	NP_047534.1		P26 [Bombyx mori nucleopolyhedrovirus]	Bombyx mori nucleopolyhedrovirus	MELYNIKYAIDPTNKIVIEQVDNVDAFVHILEPGQEVFDETLSRYHQFPGVVSSIIFTQLVLNTIISVLSEDGSLLPLKLENTCFNFHVCNKRFVFGNLPAAIVNNETKQKLRIGSPIFAGEKLVSVVTTFHRVGENEWLLPVTGIQEASRLSGHIKVPNGVRVEKLRPNMSVYGTVQLPYDKIKRHALEQENKTPNALESCVLFYRDSEIRITYNRGDYEIMHLRMPGPLIQPNTIYYS	240	Viruses; Baculoviridae; Alphabaculovirus
NP_054166	NP_054166.1		hypothetical protein ACNVgp137 [Autographa californica nucleopolyhedrovirus]	Autographa californica nucleopolyhedrovirus	MELYNIKYAIDPTNKIVIEQVDNVDAFVHILEPGQEVFDETLSQYHQFPGVVSSIIFPQLVLNTIISVLSEDGSLLTLKLENTCFNFHVCNKRFVFGNLPAAVVNNETKQKLRIGAPIFAGKKLVSVVTAFHRVGENEWLLPVTGIREASQLSGHMKVLNGVRVEKWRPNMSVYGTVQLPYDKIKQHALEQENKTPNALESCVLFYKDSEIRITYNKGDYEIMHLRMPGPLIQPNTIYYS	240	Viruses; Baculoviridae; Alphabaculovirus
YP_610991	YP_610991.1	AnpeNPV	p26 [Antheraea pernyi nucleopolyhedrovirus]	Antheraea pernyi nucleopolyhedrovirus	MDNKMYVRMEIKFDEDTGRLQIGDRDVFVRVFEPGQEVFDETLDQYHQFPGVATDVVFPQVDTGATVSVHTAAGAYSGPLTASCFNYHVCNKRFVFGVLPALEVPADVSPHLRVGAPILCNEQLVSVVTAVHERADGVWLVPVTGVRGPHQVSGHARVCNGVRAERLRAGRSVYGAVQLPYDKLKTHALSQTAPHAEASESCALFYNDSEVRITFNKGSFELMHWRLPGPFVATALNKHY	240	Viruses; Baculoviridae; Alphabaculovirus
YP_950834	YP_950834.1		P26 [Maruca vitrata nucleopolyhedrovirus]	Maruca vitrata nucleopolyhedrovirus	MELYNIKYAIDPTNKIVIEQVDNVNVFVRTLEPGQEVFNETLSQYHQFPGVISSIIFPQVELNDEISVLTDDGSLLKLKLECTGFNFHVCNKRFVFGNLPAAVVNCETKQKLRIGAPIFANEKLISVVTAFHHVCENEWLLPVTGIREMSQMSGHMKAPNGVRVEKWRPGTSVYGTVQLPYDKIKQYALEQENKMPNTLESCVIFFKDSEVRITYNKGEYEIMQLRVPGPLIQPNSAYYD	240	Viruses; Baculoviridae; Alphabaculovirus
QCF61063	QCF61063.1		p26 [Troides aeacus nucleopolyhedrovirus]	Troides aeacus nucleopolyhedrovirus	MELYNIKYAIDPTNKIVIEQVDNVEAFVHILKPGQEVFDETLSQYHQFPGVVSSIIFPQLVLNTIISVLSEDGSLLTLKLENTCFNFHVCNKRFVFGNLPAAVVNNETMQKMRIGSPIFAGEKLVSVVTAFHRVGENECLLPVTGIREASQLSGHMKVLNGVRVKKWRPNMSVYGTVQLPYDKIKQHVLEQENKTRNALESCVLFYKDSEIRITYNKGDYEIMHLRMPGPLIQPNTIYYS	240	Viruses; Baculoviridae; Alphabaculovirus; unclassified Alphabaculovirus
XP_030032408	XP_030032408.1	tobacco hornworm	poxin-like [Manduca sexta]	Manduca sexta	MSKRTVLNENYKGLVENFSIPAEVHERDGKKYASFGEVVPIHCCTPEEVEAREKTTHHYCDIFTERALAPLGELAYVRLDENTAEKVFINRSKRLLVVSHDGALAQWRAAPSFESANVFVAGSPIVNKDGELVSVVTAKRGNHYAVSNFEGEGGYFATTNPWTIINTPEGASIYGDRSFNTRAEVREYIASLPPPEVSVLLPPKPVLHTGHSSRLALVTHNGVQLAHFYLHGVIVNNIEYL	241	Eukaryota; Metazoa; Arthropoda; Hexapoda; Insecta; Pterygota; Neoptera; Endopterygota; Lepidoptera; Glossata; Ditrysia; Bombycoidea; Sphingidae; Sphinginae; Sphingini; Manduca
XP_032527851	XP_032527851.1		poxin-like [Danaus plexippus plexippus]	Danaus plexippus plexippus	MMKSTALNEKYYGLVENVTIPASLHEYNGKPYSKVGNAMPIHCATQEEKELLSRTTHHYCDLFTDKLFAPLEELVFVRLDENKAEKVFLNRHKRLFLTSSDGVVASWRCAPTLESLNKFMAGTPLVGRDGRVVSLLTAKHGNHYAVSHLEGDGGYFETSKPWEIKDMEDGRLYYGNKSFNSRDELRAYIQNLPPLEVDSSAPPQPILLRGKNPRIILVAENGRQISHQYISSNLITDVEYL	241	Eukaryota; Metazoa; Ecdysozoa; Arthropoda; Hexapoda; Insecta; Pterygota; Neoptera; Holometabola; Lepidoptera; Glossata; Ditrysia; Papilionoidea; Nymphalidae; Danainae; Danaini; Danaina; Danaus; Danaus
XP_026488588	XP_026488588.1		uncharacterized protein LOC113395234 [Vanessa tameamea]	Vanessa tameamea	MTKRTVLNEVYKGLVEEMHIPADLHERDGKKFASFGSVLPIHCATPEQVEQMSRNTHHYCDVFTPDLLAPLDDLAFVRLDENTAEKVFLNRSKRILLVSSDGRLAQWRSAPSFESANRYVGGAPLVTRAGALASVLTARLGHHYAVSAFEGDSGYFETSKPWETVDIEEGKFYYGDKGFDTREELTHYLENLPPAEVNSTTPPRPILLRGKTPRVVLMAENGRQLSHHYLCGVLANDVEYL	241	Eukaryota; Metazoa; Ecdysozoa; Arthropoda; Hexapoda; Insecta; Pterygota; Neoptera; Holometabola; Lepidoptera; Glossata; Ditrysia; Papilionoidea; Nymphalidae; Nymphalinae; Vanessa
XP_013167996	XP_013167996.1	Asian swallowtail	PREDICTED: uncharacterized protein LOC106117995 [Papilio xuthus]	Papilio xuthus	MSKRTVLNEIYKGLVESICIPAELHHKNGKRYASFGTVVPIHCCTPEEVKERVNNTHHYCDVFAEELLAPLGELAFVRLDENTAEKVFINRSKRVLIVSSDGRLAQWRCAPTFESANHYIAGTPIVNKEGALVSVVTAKRGNHYAVSNFEGEGGYFETTLPWEMVHPMQGEVIYGDQTFSSRDELRKHLANLSPAEVTSDLPVRPVLLTGVTPRITLITHNGRQLAHYYLYGVHASDVQYL	241	Eukaryota; Metazoa; Ecdysozoa; Arthropoda; Hexapoda; Insecta; Pterygota; Neoptera; Holometabola; Lepidoptera; Glossata; Ditrysia; Papilionoidea; Papilionidae; Papilioninae; Papilio
AAL17705	AAL17705.1		P26 [Anticarsia gemmatalis nucleopolyhedrovirus]	Anticarsia gemmatalis nucleopolyhedrovirus	MDNKMYVRMEIKFDEDTGRLQIGDRDVFVRVFEPGQEVFDETLDQYHQFPGVATDVVFPQLTTGATVSVHTAIGPYSGPLTVSCFNYHVCNKRFVFGVMPALEVPADVHPHLRLGAPILCGEQLVSVVTAVYERADGVWLVPVTGVREAHQVSGHARVCNGVRAERLRDGRSVYGTVQLPYNKVKAYALSQSTPAADARESCALFYNDSEVRITFSKGEFEQMHWRLPGLFCGSFGIIKHY	241	Viruses; Baculoviridae; Alphabaculovirus; unclassified Alphabaculovirus
NP_203288	NP_203288.1		P26 [Epiphyas postvittana nucleopolyhedrovirus]	Epiphyas postvittana nucleopolyhedrovirus	MVNTVVQEQKYLKMDTEITFEKETGILRMGNKELFVHVFKPGQEVFDETLNKYHQFPGVATDVIFPSIQLNKSELTVFTTSGSYTGIPNAKCFNFHVCNKRFVFGVLPALKVPADVGEHFSIGAPITCNNKLVSVVTALHKQLDGSYLVPVTGVRETSLVSGHAHVRNGVRTERWLADRAIYGTMQLPYNQIKAYAMAQVAPPADALDSCVLFYNNSEVRITFNKGNFELHHWRVPGPMCGF	242	Viruses; Baculoviridae; Alphabaculovirus
YP_009165662	YP_009165662.1		P26-2 [Perigonia lusca single nucleopolyhedrovirus]	Perigonia lusca single nucleopolyhedrovirus	MASNTIQRLGENQYKVRDCVFCVDYNFRRIQTISYKDKPVTNHVFIQHNSDPGLQQYHHYPNLATTLSLPKLHTESLVEVIMVNYNGSGDDKTIMLNEIKLSKRLYFVHHHYGKYYRYGQVPAIVLPAENKNRSTLFVGAPIFQNDNIVSFITDCYLNTEQSVYIMPVTGPSYRVDGVLTIDGIVRVIKKEDYTTIKLPTVSRIDVHVVYDKKTVTINTVYEGVILSFMLITAVFAGNLLII	242	Viruses; Baculoviridae; Alphabaculovirus; Perigonia lusca nucleopolyhedrovirus
AYN45036	AYN45036.1		p26a [Spodoptera exigua multiple nucleopolyhedrovirus]	Spodoptera exigua multiple nucleopolyhedrovirus	MSTPIDSVAEFGGDNMLQIKHVSLTINHAIRRINVLSHKNCTTRIHVFGQHDTASDFETIKYHYPGVASDVKFAKLKRNTFVNIMLIDSNRRPYLRRMKLQDHLYFIHHHYSKYYVYGQVPAVMQKTNISEFISQLYVCAPIFSDDGELISVLTDYHVNDDNCCVLPITGDAGGVKGTLCLDGFVYVYDPNDDLTKHVLQIVPRIDVYVTFDKKNVYINVVYNGETISKMYIRTLFAANVLII	243	Viruses; Baculoviridae; Alphabaculovirus
QAT90369	QAT90369.1		P26 [Spodoptera exempta nucleopolyhedrovirus]	Spodoptera exempta nucleopolyhedrovirus	MSTQIDSVALCDAPIVKHIKHVTFTINHTIRRITVLSRKDSTVRIHVFGQHDTASDYETIKYHYPGVASDVKFAKLKRNTFVNIMLIDSNHRPYLRRMKLQDHLYFMHHHYAKYYVYGQVPAVMQKTNVSEFLSQLYVCAPIFSDDGELISVVTDYYVNDDNHCVLPITGDAGGVRGSLCLDGFVYVSDPKDKLTEHVLQIVPRIDVYVTFDKKNVYINVIYNGETISKMCIRTLFAANVLII	243	Viruses; Baculoviridae; Alphabaculovirus; unclassified Alphabaculovirus
VVC88292	VVC88292.1		unnamed protein product, partial [Leptidea sinapis]	Leptidea sinapis	MSKRTVLNEDYKGLVEWFPIPAELHEADGRRFASFGSVLPIHCCTPQQIEERSKTTHHYCGVFTDDPLRDPHSELVYVRLDEDSAEKVFLNRSKRILLLSSDGRVAQWQSAPTFESSNTFVAGAPIVSQDGQLVSVVTARRGNHYAVSTFESEGGYFETSQPWEVRDMQEGGLHYADHVFLSREPLRAHVAALPPPGDDAGAPPRPLLLRGPGGGGRVLLVAGSGRQLALIYLASVFTDDIQYL	244	Eukaryota; Metazoa; Ecdysozoa; Arthropoda; Hexapoda; Insecta; Pterygota; Neoptera; Holometabola; Lepidoptera; Glossata; Ditrysia; Papilionoidea; Pieridae; Dismorphiinae; Leptidea
AXU41465	AXU41465.1	MyunNPV	P26 [Mythimna unipuncta nucleopolyhedrovirus]	Mythimna unipuncta nucleopolyhedrovirus	MDSLLICHNDRFMQVRKTPEFNIKVFTPLSSTRVSPDDDELDRLHHFPGVATTLVFPFVDTDQVLYVLLSDLTLERVHIIDDAHEPLFNFHVHKNRVVYGQLRSFEAPDRNVASKIYVGAPIFNDASRSEIVSVVTARCALPDLRFPVTGVRSNGLVSGQVEIDGEYVIQKQITANTSVYGRMISTYDEIKKFAINCNKNKGLYRNEPRAFVVTEGNNTITIALVENQFEIFRVRMNGSLVAHA	244	Viruses; Baculoviridae; Alphabaculovirus
NP_613192	NP_613192.1		p26 [Mamestra configurata nucleopolyhedrovirus A]	Mamestra configurata nucleopolyhedrovirus A	MSSSIKTDDESGRANVVEEIKHVTYSVNHLVRRVNIISSGDRDGRVHVFGQHDVAPEFEAIKYHYPNVASDWKFPRLQRNTYINVLLFNSMHKAYLRRMKLQDKLYYAHHHYAKYYVYGQVPAVLQKTDISEFMQQLYVSAPIFDDAGHLVSVVSDYYVDSNNQCVLPITGEGNGVQGTFSIDGFVYVTDPEDFLTRHIIQIVPRIDVYVTFDKKNVFINLLYNGVTLSKLRIRTQFAANVLIL	244	Viruses; Baculoviridae; Alphabaculovirus
NP_689282	NP_689282.1		putative P26 [Mamestra configurata nucleopolyhedrovirus B]	Mamestra configurata nucleopolyhedrovirus B	MSSSIKTDDESGRANVVEQMKHVTYSVNHLVRRVNIISSADRDVRVHVFGQHDVAPEFETIKYHYPNVASDWKFPRLQRNTYINVLLFNSMHKAYLRRMKLQDKLYYVHHHYAKYYVYGQVPAVLQKTDISEFMQQLYVSAPIFDDAGHLVSVVSDYYVDNNNQCVLPITGEGNGVQGTFSIDGFVYVTDPEDFLTRHIIQIVPRIDVYVTFDKKNVFINLLYNGVTLSKLRIRTQFAANVLIL	244	Viruses; Baculoviridae; Alphabaculovirus
QGX02354	QGX02354.1		p26a [Mamestra configurata nucleopolyhedrovirus A]	Mamestra configurata nucleopolyhedrovirus A	MSSSIKTDDESGRANVVEEMKHVTYSVNHLVRRVNIISSGDRDIRVHVFGQHDVAPEFEAIKYHYPNVASDWKFPRLQRNTYINVLLFNSMHKAYLRRMKLQDKLYYAHHHYAKYYVYGQVPAVLQKTDISEFMQQLYVSAPIFDDAGHLVSVVSDYYVDSNNQCVLPITGEGNGVQGTFSIDGFVYVTDPEDFLTQHIIQIVPRIDVYVTFDKKNVFVNLLYNGVTLSKLRIRTQFAANVLIL	244	Viruses; Baculoviridae; Alphabaculovirus
YP_529764	YP_529764.1		P26 [Agrotis segetum nucleopolyhedrovirus A]	Agrotis segetum nucleopolyhedrovirus A	MSTRINQVEQDSTRLCVSRVKSISYTVNHVVKRVCVLSEKNTAVRVHVFGQHDTSANFENIKYHYPGVASDIKFAKLRRNTFVNIMLFNSEKRPYLRRMRLQDQLYYSHHHYAKYYVYGQVPAVMQKTDVSKFMGQLYVSAPIFDDSGKLISVVTDYYINDKNECVVPVSGDAGGTQGMLCIDGFVYVTDPEDTISYHNIQIVPRIDVYVSFDKKNVYINLMYNGVTISKLRIRTQFAANVLIL	244	Viruses; Baculoviridae; Alphabaculovirus
YP_009011164	YP_009011164.1		p26 [Mamestra brassicae multiple nucleopolyhedrovirus]	Mamestra brassicae multiple nucleopolyhedrovirus	MSSSIKTDDESGRPNVVEQMKHVTYSVNHLVRRVNIISSADRDVRVHVFGQHDVVPEFETIKYHYPNVASDWKFPRLQRNTYINVLLFNSMHKAYLRRMKLQDKLYYVHHHYAKYYVYGQVPAVLQKTDISEFMQQLYVSAPIFDDAGHLVSVVSDYYVDNNNQCVLPITGEGNGVQGTFSIDGFVYVTDPEDFLTRHIIQIVPRIDVYVTFDKKNVFINLLYNGVTLSKLRIRTQFAANVLIL	244	Viruses; Baculoviridae; Alphabaculovirus
QHB21724	QHB21724.1		P26-2 [Euproctis digramma nucleopolyhedrovirus]	Euproctis digramma nucleopolyhedrovirus	MNIFMVNDMLMEVDFNFRRVRCVKYKNCPIFVQVHNVQSSLNETDCLPPVVHQYPNLSCSLKLPKTNANTLVKFVHFNEKNKTIRLESVKLDSSLYYTHHRKNNIYLFGLVPAAVYNYDKLNSLTKSVFIGSPIFDSNNKLLSFVTDHYLDVNSEKSDVVPKEILPVVGESYRLQSFFCLTGQVRIYNETDEVARNVVGINESSKIDINVVVCKNQVEVFIVYEGNTISYVKVKCKFAGSLLIV	244	Viruses; Baculoviridae; Alphabaculovirus; unclassified Alphabaculovirus
YP_009049890	YP_009049890.1		p26 [Peridroma alphabaculovirus]	Peridroma alphabaculovirus	MSSCIVLDGGAAVAAANMRIKSIVYTVDHAARRVHLLSDHDRPVRVHVFGQHDTAAEFETYKHHYPGVASDVKFTRLRRHSYVNVMLFDAEKRPYLRRMRIQDRLYYTHHHYGKYYVYGQVPAVMQKTNATGFVSQLYVSAPIFDDAGALVSVISDFYIDSDNNCVLPISGDAGGVQGRFCLDGFVYITDPDKCLRGIAMQTVARIDVYVAFDKKHVYVNLMYNGQVLSKIRIRTLFAANVLIL	244	Viruses; Baculoviridae; Alphabaculovirus; unclassified Alphabaculovirus
XP_014360732	XP_014360732.1	common yellow swallowtail	PREDICTED: uncharacterized protein LOC106712630 isoform X1 [Papilio machaon]	Papilio machaon	MCTTMSKRTVLNEVYKGLVESMCIPAELHHRNSKRYASFGTVVPIHCCTPEEVKERVNNTHHYCDVFTEELLAPLGELAFVRLDENTAEKVFINRSKRVLMVSSDGRLAQWRCAPTFESANHYIAGTPIVNKEGALVSVVTAKRGNHYAVSNFEGEGGYFETSLPWETVHPMQGEVIYGDQTFSSRDELRKHLTNLSPAEVTSDLPVRPVLLTGATPRLTLITHNGRQLAHYYLYGVHASDVQYL	245	Eukaryota; Metazoa; Ecdysozoa; Arthropoda; Hexapoda; Insecta; Pterygota; Neoptera; Holometabola; Lepidoptera; Glossata; Ditrysia; Papilionoidea; Papilionidae; Papilioninae; Papilio
AAX78497	AAX78497.1		unknown [synthetic construct]	synthetic construct	MGHHHHHHHHHHSSGHIDDDDKHMLEMAMFYAHALGGYDENLHAFPGISSTVANDVRKYSVVSVYNNKYDIVKDKYMWCYSQVNKRYIGALLPMFECNEYLQIGDPIHDQEGNQISIITYRHKNYYALSGIGYESLDLCLEGVGIHHHVLETGNAVYGKVQHDYSTIKEKAKEMNALSPGPIIDYHVWIGDCICQVTAVDVHGKEIMRMRFKKGAVLPIPNLVKVKLGENDTENLSSTISAAPSR	245	other sequences; artificial sequences
YP_009250032	YP_009250032.1		P26B [Urbanus proteus nucleopolyhedrovirus]	Urbanus proteus nucleopolyhedrovirus	MQLHLNRLCNMNVSNEIEEKMEINSFVLKVNHSLKTVSYVSFKNKPIDVHVFTGFEGGDMYNSYHKYCTYATTLLPKRLNRYKPVKVMTFDDNKMMEITEMSADNKMYFVHNHYYNNYTYALTPGLKIHRNNIRKMYTGAPVFDENGRWVSCISEVYIEDNSEFCIFPLENDSTSSLRGLFQFNGYVYFTHNEDKINFDKIVPQNQIDVYVNSYKSNTYINLTFNGKIVNSLHVKAPFAGNVLII	245	Viruses; Baculoviridae
AOL56498	AOL56498.1		P26b [Chrysodeixis includens nucleopolyhedrovirus]	Chrysodeixis includens nucleopolyhedrovirus	MIIRIEMSIQTGDIVESSVVTQFNSVAFIVNHETRRVTIMSYKNEPVKFHVFNQHDTDPELMKLQYHYPGLASSIELPKITHMRKVRLMVFDQRHRMLLAEEFLLEKLYFVHHHYAKYYVYGLVPVVVKNFRHNLYIGAPVFDETGKVLLSVVSDCYFSSTTEENCVIPLSGELSGSRGVLCLDGHVWLNETGDDFTFDKTNVPNRIDLYISHDKKFIYLNVFYNNYIINFIRVKAKFVGNVLIR	245	Viruses; Baculoviridae; Alphabaculovirus
YP_009116975	YP_009116975.1	PsinSNPV-IE	P26b [Pseudoplusia includens SNPV IE]	Pseudoplusia includens SNPV IE	MIIRIEMSIQTGDIVESSVVTQFNSVAFIVNHETRRVTIMSYKNEPVKFHVFNQHDTDPELMKLQYHYPGLASSIELPKITHMRKVRLMVFDQRHRMLLAEEFLLENLYFVHHHYAKYYVYGLVPVVVKNFRHNLYIGAPGFDETGKVLLSVVSDCYFSSTTEENCVIPLSGELSGSRGVLCLDGHVWLNETGDDFTFDKTNVPNRIEFVYFARQKFIYLNVFYNNYIINFIRVKAKFVGNVLIR	245	Viruses; Baculoviridae; Alphabaculovirus
YP_002268130	YP_002268130.1	AgipMNPV	P26 [Agrotis ipsilon multiple nucleopolyhedrovirus]	Agrotis ipsilon multiple nucleopolyhedrovirus	MSSHINSVGDKLVVANTLVDTIKSITYSVNHVIRRVSVLSEKNSTVRVHVFGQHDTAADLEDIKHHYPGVASDVKFGKLHRHSFVNVMLFDSNRRPYLRRMRLQDRLYYTHHHYAKYYVYGQVPAVIQKTDISEFMQQLYVSAPIFDDSGKLVSVVTDYYVNDENQCVLPISGEAGGTQGTLCIDGFVYVTEPEDSLSYRTIQIVARIDVYVAFDKKNVFINLLYNGVIISKLRIRTLFAANVLIL	246	Viruses; Baculoviridae; Alphabaculovirus
YP_009112651	YP_009112651.1	AgseNPV-B	p26 [Agrotis segetum nucleopolyhedrovirus B]	Agrotis segetum nucleopolyhedrovirus B	MSSHMKSVGDKLVVANTLVDTVKSITYSVNHIIRRVSVLSEKNLAVRVHVFGQHDTAADLEDIKYHYPGVASDVKFGKLHRHSFVNVLLFDGNRRPYLRRMRVQDRLYYTHHHYAKYYVYGQVPAVIQKTDISEFMQHLYVSAPIFDDSGKLVSVVTDYYVNDQNQCVLPISGEAGGTQGTLCIDGFVYVTEPEDSLSYRTIQIVSRIDVYVAYDKKNVFINLLYNGVTISKLRIRTLFAANVLIL	246	Viruses; Baculoviridae; Alphabaculovirus
YP_007250540	YP_007250540.1		p26 protein [Thysanoplusia orichalcea nucleopolyhedrovirus]	Thysanoplusia orichalcea nucleopolyhedrovirus	MAKQVDVMEEVYNVKCTTDSKKMEIKQIDDVDAFVQVIEPGQEVFNETFNEYHQFPGVVSSIVFPQLALDTIVNILTEDGSLHTAKLNHTCFNFHVCNKRFVFGNLPAAIVNGETKRKLRIGAPIFANETLVSVVTAFHRIDENEWMLPVTGIREATQFSGHMKVLNGVCVEKWRPNMSVYGTVQLPYDKIKQHAVEQKLPPMSAPESCVLFYKESEIRITFNRGDYEIIHFRLPGPLVQPSITYYN	247	Viruses; Baculoviridae; Alphabaculovirus
AXU41686	AXU41686.1		P26 [Spodoptera eridania nucleopolyhedrovirus]	Spodoptera eridania nucleopolyhedrovirus	MSLCVNSVATTDDVAHPFAYVEHIKSVTYSVNHIARRVRVLSDKDCSVRIHVFGQHDTAADFEHIKYHYPGVASDVKFAKLKKNSYINIMLFDSNHKAYLRRMRVQDRMYYTHHHYAKYYVYGQVPAVVQKTNVAEFLSQLYVSAPIFDDNGTLISVISDYYVNDDNQCIVPVSGDAGGTQGTLCLDGFVYVTDPQDKLTYHTLQILPRIDVYVTFDKKNVYVNVMYNGETISKIRIKTQFAGNVLIL	248	Viruses; Baculoviridae; Alphabaculovirus; unclassified Alphabaculovirus
PCG80277	PCG80277.1	tobacco budworm	hypothetical protein B5V51_9615 [Heliothis virescens]	Heliothis virescens	MSKRTGFPTPSGSAGLTYRGLVESMAIPAELHQRPDGRHFASFGGALPIHCCTPEQVEKLSKTTHHYCDIFTEQLLAPLGELVYVRIDENTAEKVFINRSKRVLVVSSDGVLAQWRLAPTFESANLYVAGTPVVNQAGELVSLVTAKRGNHYAVSTFEGEGGYFDTTEPWQTRDIPEGCGVYGDRTFSSRDELRAYVSALPPLGDPPAGAPTPLLYQGATPRLVLVAKNGRQISHQYLHGVVTDNIEYL	249	Eukaryota; Metazoa; Ecdysozoa; Arthropoda; Hexapoda; Insecta; Pterygota; Neoptera; Holometabola; Lepidoptera; Glossata; Ditrysia; Noctuoidea; Noctuidae; Heliothinae; Heliothis
CAB3245528	CAB3245528.1		unnamed protein product [Arctia plantaginis]	Arctia plantaginis	MYNANSQCKMSKRTALNENYKGLVEELPIPAEVHERDGKKYASFGSTIPIHSCSPDEIKQYANKTHHYCDVFTEQLLAPLGELVYVRLDENTAEKVFINRNKRILLVSSDGELAQWRCAPTFESPNSYMAGAPIVNKDGELVSVVTAKKGNHYAVSTFEGEGGYFDTAVPWLVLDAPEGANIYGAKTFATREQLREHVARLPPPEVSPQSPPVPVLHRGNSPRIILLAQNGRQISHQFLHGVITMDVEYL	250	Eukaryota; Metazoa; Ecdysozoa; Arthropoda; Hexapoda; Insecta; Pterygota; Neoptera; Holometabola; Lepidoptera; Glossata; Ditrysia; Noctuoidea; Erebidae; Arctiinae; Arctia
XP_031764484	XP_031764484.1	greater wax moth	poxin-like [Galleria mellonella]	Galleria mellonella	MSKRTVLNENYKGIVENFPIPAELHERPDGTTYASFGDVVPIHCCTPEQVSKLAKVTHHYCDVFTQELMAPLEELAYVRLDENTAEKVFINRTKRLLITSSDGQLAQWRCAPSFESANQYVAGAPVVNQDGALLSVVTARKGNHYAVSTFEVCFYFHTIFAYFPQLRILRIYFLACWCYSKYYGAETFNSREELTEYISKTPPASVGPSEPPTAILVQGKTPRLALVAKNGRQIAHHYLPPGLVTEVDYL	250	Eukaryota; Metazoa; Ecdysozoa; Arthropoda; Hexapoda; Insecta; Pterygota; Neoptera; Holometabola; Lepidoptera; Glossata; Ditrysia; Pyraloidea; Pyralidae; Galleriinae; Galleria
CDG72838	CDG72838.1		p26 (Ac136) [Spodoptera exigua multiple nucleopolyhedrovirus]	Spodoptera exigua multiple nucleopolyhedrovirus	MSMCVNSVATNDVAKPSTFAARVEHMKSVIYSVNHVARRVYLISEKDRSVRVHVFGQHDTAPEFEHIKYQYPGVASDVKFAKLKKNSYVNIMLFDSNKKAYLRRMRVQDRMYYTHHHYGKYYVYGQVPAVVQKSNIAEFMAQLYVSAPIFDDNGALISVISDYYVNDDNHCIVPVSGDAGGTHGSLCLDGFVYVTDPQDKLTYHTIQIVPRIDAYVTFDKKNVYVDVIYNGETISKIRIKTQFAGNVLIL	250	Viruses; Baculoviridae; Alphabaculovirus
NP_037847	NP_037847.1		ORF87 p26 [Spodoptera exigua multiple nucleopolyhedrovirus]	Spodoptera exigua multiple nucleopolyhedrovirus	MSMCINSVATNDVAKPSTFAARVEHMKSVIYSVNHVARRVYLISEKDRSVRVHVFGQHDTAPEFEHIKYQYPGVASDVKFAKLKKNSYVNIMLFDSNKKAYLRRMRVQDRMYYTHHHYGKYYVYGQVPAVVQKSNIAEFMAQLYVSAPIFDDNGALISVISDYYVNDDNHCIVPVSGDAGGTHGSLCLDGFVYVTDPQDKLTYHTIQIVPRIDAYVTFDKKNVYVDVIYNGETISKIRIKTQFAGNVLIL	250	Viruses; Baculoviridae; Alphabaculovirus
YP_003517776	YP_003517776.1		P26 [Lymantria xylina nucleopolyhedrovirus]	Lymantria xylina nucleopolyhedrovirus	MSKVSVVLITVAVACAAATETGSGRAHSVDYVVRRLSRTVDVTSVRDRKTVIKIVSPNQWDDEDGDEFAYRYPGAASDAAFETVRVGEKLHVLLDNHTLVEAVATTDEYVFYHTRRRRSVVGRLAAFAVRDFALAARIWPGAPIFRRGRFVSVVTGRYQDYANDRVLFPVTGASAEAAEVAHDRDRLSVNSSPYAPTPPLARAGAFRDWPRVATLFCDAPRRRVVLALTEGEFEIARFTLVGVLADFEHI	250	Viruses; Baculoviridae; Alphabaculovirus
CDG72427	CDG72427.1		p26 (Ac136) [Spodoptera exigua multiple nucleopolyhedrovirus]	Spodoptera exigua multiple nucleopolyhedrovirus	MSMCVNSVATNDVAKPSTFAAARVEHMKSVIYSVNHVARRVYLISEKDRSVRVHVFGQHDTAPEFEHIKYQYPGVASDVKFAKLKKNSYVNIMLFDSNKKAYLRRMRVQDRMYYTHHHYGKYYVYGQVPAVVQKSNIAEFMAQLYVSAPIFDDNGALISVISDYYVNDDNHCIVPVSGDAGGTHGSLCLDGFVYVTDPQDKLTYHTIQIVPRIDAYVTFDKKNVYVDVIYNGETISKIRIKTQFAGNVLIL	251	Viruses; Baculoviridae; Alphabaculovirus
QCQ67291	QCQ67291.1		P26 [Lymantria dispar multiple nucleopolyhedrovirus]	Lymantria dispar multiple nucleopolyhedrovirus	MSKVSAILILMIVAGVAAAETGSGRVYSVDYVVRPSRRTVDVTSVDGRKITVKVVPPHRWDDEDDAAELAYRYPGAASDAPFETARVGQKLQVLLDNHTLIDAVAATDEYVFHHTRRRRSVVGKLAAFALNDFALAARVWPGAPIFRRGRFVSVVSGRYQDYANDRVLFPVTGASAQMVEVAHDRDRLSVSSSARPPARAAGDGREFRDWPRVATLFCDAPRRRVALALTEGEFEIARFALVGLLADFEHI	251	Viruses; Baculoviridae; Alphabaculovirus
AFS51896	AFS51896.1		DekiORF18 [Dendrolimus kikuchii nucleopolyhedrovirus]	Dendrolimus kikuchii nucleopolyhedrovirus	MAATRGGVEYRTQHVTRTVEIKRVNGVDAFVHVFEPGHEVFEDTLNKYHQFPGVATSIAFKQPSLNSEVSVMLNDGTLHTAPVDTVCFNFHVCNKRFVFGTVPAMRIDKRIRERVYEGSPIFQKEKLISAVTGFHYVDDNEYLMPVTGIREPTLVSGHLTAANGVRVEKWLPNMSIYGSRQLPYDKIKTYILEINQKQQQQQQQHISSYEDVCVIFYNDTEVRITHSINGCEQLHFRLSGVLMQPNVLYYN	251	Viruses; Baculoviridae; Alphabaculovirus; unclassified Alphabaculovirus
YP_002332788	YP_002332788.1		P26 [Spodoptera litura nucleopolyhedrovirus II]	Spodoptera litura nucleopolyhedrovirus II	MSLRVNSVATTDDVANAPLPFAYVEHIKSVTYSVNHIARRVRVLSDKDCSVRIHVFGQHDTAADFEHIKYHYPGVASDVKFAKLKKNSYINIMLFDSNHKAYLRRMRVQDRMYYTHHHYAKYYVYGQVPAVVQKTNVAEFLSQLYVSAPIFDDNGTLISVISDYYVNDDNQCIVPVSGDAGGTQGTLCLDGFVYVTDPQDKLTYHTLQILPRIDVYVTFDKKNVYVNVMYNGETISKIRIKTQFAGNVLIL	251	Viruses; Baculoviridae; Alphabaculovirus; unclassified Alphabaculovirus
ACA02643	ACA02643.1		P26 [Spodoptera frugiperda multiple nucleopolyhedrovirus]	Spodoptera frugiperda multiple nucleopolyhedrovirus	MSLRINSVATENVAAAAGTANVSTIEYIKSITYCVNHMTRRVYVLSEKNCAVRIHVFGQHDTSADFENIKYHYPGVASDVKFLKLKRNSYVNILLFNANNKPYLRRMRIQDRMYYTHHHYAKYYVYGQVPAIMQKNNLAEFMSQLYVSAPIFDDNGTLISVVTDYYVNDENHCIVPIAGDAGGAQGTVCLDGFVYVTDPNDHLTFHTFQILPRIDVYVTFDKKNVYINVVYNGEPISKLRVKTQFAGNVLIL	252	Viruses; Baculoviridae; Alphabaculovirus
AHC69537	AHC69537.1		P26 [Lymantria dispar multiple nucleopolyhedrovirus]	Lymantria dispar multiple nucleopolyhedrovirus	MSKVSAILILMIVADVAAAAETGSGRVYSVDYVVRPSRRTVDVTSVDGRKITVKVVPPHRWDDEDDAAELAYRYPGAASDAPFETARVGQKLQVLLDNHTLIDAVAATDEYVFHHTRRRRSVVGKLAAFALNDFALAARVWPGAPIFRRGRFVSVVSGRYQDYANDRVLFPVTGASAQMVEVAHDRDRLSVSSSARPPARAAGDGREFRDWPRVATLFCDAPRRRVALALTEGEFEIARFALVGLLADFEHI	252	Viruses; Baculoviridae; Alphabaculovirus
AIW01497	AIW01497.1		P26 protein [Spodoptera frugiperda multiple nucleopolyhedrovirus]	Spodoptera frugiperda multiple nucleopolyhedrovirus	MSLRINSVATENVAAAAGAVNVSTIEYIKSITYCVNHMTRRVYVLSEKNCAVRIHVFGQHDTSADFEDIKYHYPGVASDVKFLKLKRNSYVNILLFNANNKPYLRRMRIQDRMYYTHHHYAKYYVYGQVPAIMQKNNLAEFMSQLYVSAPIFDDNGTLISVVTDYYVNDENHCIVPIAGDAGGAQGTVCLDGFVYVTDPNDHLTFHTFQILPRIDVYVTFDKKNVYINVVYNGEPISKLRVKTQFAGNVLIL	252	Viruses; Baculoviridae; Alphabaculovirus
AIX47878	AIX47878.1	LdMNPV-3029	P26 [Lymantria dispar multiple nucleopolyhedrovirus]	Lymantria dispar multiple nucleopolyhedrovirus	MSKVSAILILMIVAGVAAAETGSGRVYSVDYVVRPSRRTVDVTSVDGRKITVKVVPPHRWDDEDDAAAELAYRYPGAASDAPFEAARVGQKLQVLLDNHTLIDAVAATDEYVFHHTRRRRSVVGKLAAFALNDFALAARVWPGAPIFRRGRFVSVVSGRYQDYANDRVLFPVTGASAQMVEVAHDRDRLSVSSSARPPARAAGDGREFRDWPRVATLFCDAPRRRVALALTEGEFEIARFALVGLLADFEHI	252	Viruses; Baculoviridae; Alphabaculovirus
AJR20312	AJR20312.1		p26 [Lymantria dispar multiple nucleopolyhedrovirus]	Lymantria dispar multiple nucleopolyhedrovirus	MSKVSAILILMIVAGVAAAAETGSGRVYSVDYVVRPSRRTVDVTSVDGRKITVKVVPPHRWDDEDDAAELAYRYPGAASDAPFEAARVGQKLQVLLDNHTLIDAVAATDEYVFHHTRRRRSVVGKLAAFALNDFALAARVWPGAPIFRRGRFVSVVSGRYQDYANDRVLFPVTGASAQMVEVAHDRDRLSVSSSARPPARAAGDGREFRDWPRVATLFCDAPRRRVALALTEGEFEIARFALVGLLADFEHI	252	Viruses; Baculoviridae; Alphabaculovirus
AMO27711	AMO27711.1		P26 [Lymantria dispar multiple nucleopolyhedrovirus]	Lymantria dispar multiple nucleopolyhedrovirus	MSKVSAILILMIVAGVAAAAETGSGRVYSVDYVVRPSRRTVDVTSVDGRKITVKVVPPHRWDDEDDAAELAYRYPGAASDAPFETARVGQTLQVLLDNHTLIDAVAATDEYVFHHTRRRRSVVGKLAAFALNDFALAARVWPGAPIFRRGRFVSVVSGRYQDYANDRVLFPVTGASAQMVEVTHDRDRLSVSSSARPPARAAGDGREFRDWPRVATLFCDAPRRRVALALTEGEFEIARFALVGLLADFEHI	252	Viruses; Baculoviridae; Alphabaculovirus
QDE14895	QDE14895.1		p26 [Lymantria dispar multiple nucleopolyhedrovirus]	Lymantria dispar multiple nucleopolyhedrovirus	MSKVSAILILMIVAGVAAAAETGSGRVYSVDYVVRPSRRTVDVTSVDGRKITVKVVPPHRWDDEDDAAELAYRYPGAASDAPFETARVGQTLQVLLDNHTLIDAVAATDEYVFHHTRRRRSVVGKLAAFALNDFALAARVWPGAPIFRRGRFVSVVSGRYQDYANDRVLFPVTGASAQMVEVAHDRDRLSVSSSARPPARAAGDGREFRDWPRVATLFCDAPRRRVALALTEGEFEIARFALVGLLADFEHI	252	Viruses; Baculoviridae; Alphabaculovirus
QDH05884	QDH05884.1		Ld-p26 [Lymantria dispar multiple nucleopolyhedrovirus]	Lymantria dispar multiple nucleopolyhedrovirus	MSKVSAILILMIVAGVAAAAETGSGRVYSVDYVVRPSRRTVDVTSVDGRKITVKVVPPHRWDDEDDAAELAYRYPGAASDAPFETARVGQKLQVLLDNHTLIDAVAATDEYVFHHTRRRRSVVGKLAAFALNDFALAARVWPGAPIFRRGRFVSVVSGRYQDYANDRVLFPVTGASAQMVEVAHDRDRLSVSSSARPPARAAGDGREFRDWPRVATLFCDAPRRRVALALTEGEFEIARFALVGLLADFEHI	252	Viruses; Baculoviridae; Alphabaculovirus
YP_001036378	YP_001036378.1		p26 [Spodoptera frugiperda multiple nucleopolyhedrovirus]	Spodoptera frugiperda multiple nucleopolyhedrovirus	MSLRINSVATENVAAAAGAANVSTIEYIKSITYCVNHMTRRVYVLSEKNCAVRIHVFGQHDTSADFENIKYHYPGVASDVKFLKLKRNSYVNILLFNANNKPYLRRMRIQDRMYYTHHHYAKYYVYGQVPAIMQKNNLAEFMSQLYVSAPIFDDNGTLISVVTDYYVNDENHCIVPIAGDAGGAQGTVCLDGFVYVTDPNDHLTFHTFQILPRIDVYVTFDKKNVYINVVYNGEPISKLRVKTQFAGNVLIL	252	Viruses; Baculoviridae; Alphabaculovirus
NP_047676	NP_047676.1		Ld-p26 peptide [Lymantria dispar multiple nucleopolyhedrovirus]	Lymantria dispar multiple nucleopolyhedrovirus	MSKVSAILILMIVAGVAAAETGSGRVYSVDYVVRPSRRTVDVTSVDGRKITVKVVPPHRWDDEDDDAAAELAYRYPGAASDAPFEAARVGQKLQVLLDNHTLIDAVAATDEYVFHHTRRRRSVVGKLAAFALNDFALAARVWPGAPIFRRGRFVSVVSGRYQDYANDRVLFPVTGASAQMVEVAHDRDRLSVSSSARPPARAAGDGREFRDWPRVATLFCDAPRRRVALALTEGEFEIARFALVGLLADFEHI	253	Viruses; Baculoviridae; Alphabaculovirus
QEI03538	QEI03538.1		P26-B [Spodoptera cosmioides nucleopolyhedrovirus]	Spodoptera cosmioides nucleopolyhedrovirus	MSLRINSVATDDVASNKLPPHPFTCVENMKSVTYSVNHIARRVRVLSDKDCSVRIHVFGQHDTAADFERIKYHYPGVASDVKFAKLKKNSYINIMLFDSNKKAYLRRMRVQDRMYYTHHHYAKYYVYGQVPAVVQKTNVGEFLSQLYVSAPIFDDNGALISVISDYYVTDDNHCIVPVSGDAGGTQGTLCLDGFVYVTDPHDKLTYHTLQIVPRIDVYVTFDKKNVYIDVMYNGESISKIRIKTQFAGNVLIL	253	Viruses; Baculoviridae; Alphabaculovirus; unclassified Alphabaculovirus
YP_009666756	YP_009666756.1		P26 [Mythimna unipuncta nucleopolyhedrovirus]	Mythimna unipuncta nucleopolyhedrovirus	MSTSIKVAASDGTDVANANDNLVLGRIGGIKNVTYTADHNMRRVRILTNRNESVHIHVFGQHDYASELEGIKYHYPGVASDVKFNRLPRNSFVSVMLFDSNKRAYLRRMRLRDRLYYTHHHYAKYYVYGQVPAVMQKTNISEFMTQLYVSAPIFNDAGDLVSVVSDYYVDDQNQCVLPISGESSGCHGTLCLDGFVYVTDSEDTLTHHTIQIVARIDVYVSFDKKNVYVNVLYNGNTISKLCIRTQFAANVLIL	254	Viruses; Baculoviridae; Alphabaculovirus
XP_021205460	XP_021205460.1	domestic silkworm	uncharacterized protein LOC101743840 [Bombyx mori]	Bombyx mori	MTGIVELDLRMLKKKTAMSKRTVLNENYKGIVESMSIPAEIHERNGKKYASVGSILPIHCCPPEELERRAESTHHYCGVFTDELLAPLEELAYVRLDENTAEKVFINRAKRILIVSSDGHLAQWRCAPTFESANRYIAGTPIVDQRGGVISVVVAKKNNHYAVSSFEGEGGYFESTQNWKVVEPAAGGYAYGELTFPSRTALREHVAGLRGGAGAWGDAVPVLRGGTSPRLALVLDGRQLAHYYLHNVIVDVEYL	255	Eukaryota; Metazoa; Ecdysozoa; Arthropoda; Hexapoda; Insecta; Pterygota; Neoptera; Holometabola; Lepidoptera; Glossata; Ditrysia; Bombycoidea; Bombycidae; Bombycinae; Bombyx
XP_028034545	XP_028034545.1	wild silkworm	uncharacterized protein LOC114246282 isoform X1 [Bombyx mandarina]	Bombyx mandarina	MTGIVELDLRMLKKKTAMSKRTVLNENYKGIVESMSIPAEIHERNGKKYASVGSILPIHCCPPEELERRAESTHHYCGVFTDELLAPLEELAYVRLDENTAEKVFINRAKRILIVSSDGHLAQWRCAPTFESANRYIAGTPIVDQRGGVISVVVAKKNNHYAVSSFEGEGGYFESTQNWKVVEPAAGGYAYGELTFPSRTALREHVAGLRGGAGAWGDAVPVLRGGTSPRLALVLDGRQLAHYYLHNVIADVEYL	255	Eukaryota; Metazoa; Ecdysozoa; Arthropoda; Hexapoda; Insecta; Pterygota; Neoptera; Holometabola; Lepidoptera; Glossata; Ditrysia; Bombycoidea; Bombycidae; Bombycinae; Bombyx
YP_758317	YP_758317.1		p26 [Leucania separata nucleopolyhedrovirus]	Leucania separata nucleopolyhedrovirus	MDNLLLCHSDRSMRILKTADLNIRIFSPLSSNLIDANDDDDDKTDDDELDRLHHFPGVASTIVFPFVEIDQILYVMLSDLTLQRVHIVNDDHEPLFNFHVYKNRVVYGQLRSFEAPDRNVANKIYVGAPIFSDASKRNVVSVVTARCALPDLRFPVSGVRSEGLVSGQIEIDGEYVIQRQRTADTSVYGRKVATYADIKKFAIDCNVNKSAHRNEPRAFIVTEGDGNNTITIALVENQFEIFRVRMSGSLVAQNGG	256	Viruses; Baculoviridae; Alphabaculovirus
YP_009666370	YP_009666370.1		P26 [Lonomia obliqua multiple nucleopolyhedrovirus]	Lonomia obliqua multiple nucleopolyhedrovirus	MAASDNDNNLIKNNVTYEIDHVNKRIKVKQVDQENVFMRVLKPAQEIFDEDLDCYHQFPGVITSLVFPRLNLNDIVDVLLSDNTLYSCRADRVCFNFHICNKRVVFGSLIALHITNADLLEKLYIGSPVFVNNKFVSIITAFHRYVNDNDKEEYLVPITGVRESSQVSGHLKTPYGVHVEKLRPNMSVYGNKQLPYDKIKRYALEQHNAIPLNKEIQEHVVIFYNDKEVRLTYNRINYELLHLRMNGPLIEPNSMYYK	258	Viruses; Baculoviridae; Alphabaculovirus; Lonomia obliqua nucleopolyhedrovirus
AOT85490	AOT85490.1		p26 [Cyclophragma undans nucleopolyhedrovirus]	Cyclophragma undans nucleopolyhedrovirus	MAKTSCHGVDYETRHAAQRIEIKRVDGVDVFIRVFNPGQEVFDEALDDYHQFPGVATSIVFKQPSLRSEASVMLNDGTLHSAFINEVCFNFHVCNKRFVFGTVSAMQINRRVRDKLYTGSPIFQDNKLISAVTGFHYINEDHYLMAVTGVRESTLVSGHLTAANGVRVEKRLPNMSIYGARQLPYDRIKAFILETQQKRQQQQQQQQQTTVLSLSTDVCVIFYDDTEVRITYSNNGCETLHLRLPGVLMQSKVFYYNL	258	Viruses; Baculoviridae; Alphabaculovirus; unclassified Alphabaculovirus
YP_002854671	YP_002854671.1		P26-2 [Euproctis pseudoconspersa nucleopolyhedrovirus]	Euproctis pseudoconspersa nucleopolyhedrovirus	MNVFIVNDTLMEVDFNFRRVRCLKYKNKPIFVKIHSSSEAVNHAEDKKMVTANVPQEERSSEINVDDDAAHHHYPGMTCSLKLPKVNAGTTVKVVCFNDKNKTVRVESVRLDSCLYYAHHRRGNVYVLGLVPAIVMTYDKTANSAAESIFLGSPVFNADNRLISFITDHYLDSKTKNDETIIKEILPVSGESYRLQSAFSLTGKVRIYYENDLANRKLSPSLSIDIDVIVRRNQVEVFVIYNKKTISYLKIKCKYAGNVLVV	262	Viruses; Baculoviridae; Alphabaculovirus
CAB3245527	CAB3245527.1		unnamed protein product [Arctia plantaginis]	Arctia plantaginis	MSVQVLINRKKRVSVASDHNLAQCHCTSAFKSSNSYMAGASTVNKGSEFVSIVSAKKSNYHTISEGEVGYFDTAVPWLVLDAPEGQDVRHARAAARARFPTVDSVPNKLRQVNNRINFNVFEDTTKLTVNTASFNNGFNSVSNLEREYNEEIEEAQRSANFNPLKKEDHSFYEIETTLSKFIRRTVRDTLFELISKMDRSVIQSIDEENIMNGKSKKMKREDQIKDDGPIGGILTSDGETQMLMGTFQAIMRPGTLNLPNIQG	263	Eukaryota; Metazoa; Ecdysozoa; Arthropoda; Hexapoda; Insecta; Pterygota; Neoptera; Holometabola; Lepidoptera; Glossata; Ditrysia; Noctuoidea; Erebidae; Arctiinae; Arctia
AAC59606	AAC59606.1		P26 [Buzura suppressaria nucleopolyhedrovirus]	Buzura suppressaria nucleopolyhedrovirus	MIELFFLAIAFLSTAKTSSINNVHYIVDEFNKSIKITHVNGVEVTVQIIPPHGEFSTREFDTMHQFPGVATDLLLTGAPSDKAILHVLMKDGNLLRTTANRVFSNFHVYRHRMVYGQLYTFVTDDFGEAEKIYLGAPIFYNNKLVSVVTCRFDDYERGLVYFPVTGVRHDRLISGQLHFDDNIVKVTRLQPGMSVYGRNQLPYSLGVKQLAMSAYNNRQMYRDWPRTVFVYYNESDIIISLVEGEFEISRVRFQGPLVEPQHK	263	Viruses; Baculoviridae; Alphabaculovirus
AKN90978	AKN90978.1		P26 [Buzura suppressaria nucleopolyhedrovirus]	Buzura suppressaria nucleopolyhedrovirus	MIELFFLAIAFLNTAKTSSINNVHYIVDEFNKSIKITHVNGVEVTVQIIPPHGEFSTREFDTMHQFPGVATDLLLTGAPSDKAILHVLMKDGNLLRTTANRVFSNFHVYRHRMVYGQLYTFVTDDFGEAEKIYLGAPIFYNNKLVSVVTCRFDDYERGLVYFPVTGVRHDRLISGQLHFDDNIVKVTRLQPGMSVYGRNQLPYSLGVKQLAMSAYNNRQMYRDWPRTVFVYYNESDIIISLVEGEFEISRVRFQGPLVEPQHK	263	Viruses; Baculoviridae; Alphabaculovirus
YP_009001785	YP_009001785.1		P26 [Buzura suppressaria nucleopolyhedrovirus]	Buzura suppressaria nucleopolyhedrovirus	MIELFFLAIAFLSTAKTSSINNVHYIVDEFNKSIKITHVNGVEVTVQIIPPHGELSTREFDSMHQFPGVATDLLLTGAPSDKAILHVLMKDGNLLRTTANRVFSNFHVYRHRMVYGQLYTFVTDDFGEAEKIYLGAPIFYNNKLVSVVTCRFDDYERGLVYFPVTGVRHDRLISGQLHFDDNIVKVTRLQPGMSVYGRNQLPYSLGVKQLAMSAYNNRQMYRDWPRTVFVYYNESDIIISLVEGEFEISRVRFQGPLVEPQHK	263	Viruses; Baculoviridae; Alphabaculovirus
AWW14370	AWW14370.1		p26 [Hyposidra talaca NPV]	Hyposidra talaca NPV	MIKLLFLAIALMNTAATLSVYNVQYVVDENDKTMNITHVNGVRTTVRVIPPHGEILAREYDAMHQFPGVATDVMLTGTPSNRAILHVLLSDGVMLRTVADRVFTNFHVHRQRMIYGQLFTFATDDFSVAEKIYPGAPIFYNNKLVSVVTCRFDDYERGLVYFPVTGVRNDRLVSGQMHIDDRVVKVTRLQPGMSVYGRSQMPYSLGVKQLAMSAYNNRQMYRDWPRTAFVYHNERDIIISLVEGEFEISRVRFQGPLVEPQHK	263	Viruses; Baculoviridae; Alphabaculovirus; unclassified Alphabaculovirus
XP_028161005	XP_028161005.1	Asian corn borer	uncharacterized protein LOC114353284 isoform X1 [Ostrinia furnacalis]	Ostrinia furnacalis	MTSMIYLASCVLISVAFTNARSSMSKRTVLNEQYKGLVEAMAIPAELHERDGKRLASFGAVLPIHCAAPEQVEQLANTTHHYCDVFTDELLAPLGELAYVRIDENTAEKVFINRSKRILLISSDGQMAQWRCAATFESANQFLAGTPIVNKDGALVSVVTAKRGNNYAVSTFEGEGGYFETSEPWEVIDAPASGLIYGTQAFANREALRQHLLSLPAALVDASSPARPALLRGAHARIVLVARNGRQIAHHYLQGVLTNDIDYL	264	Eukaryota; Metazoa; Ecdysozoa; Arthropoda; Hexapoda; Insecta; Pterygota; Neoptera; Holometabola; Lepidoptera; Glossata; Ditrysia; Pyraloidea; Crambidae; Pyraustinae; Ostrinia
XP_011565910	XP_011565910.1	diamondback moth	PREDICTED: uncharacterized protein LOC105395651 isoform X1 [Plutella xylostella]	Plutella xylostella	MKMCSLTKLLLIINLVVFLKTKSTMAQRTVLNDNYKGLVESVSIPAVVEERDGKKFARSSSVVPIHCCTPDEISAYAPKTHHYCDVFTEEVLAPLEELAFVRLDQNTAEKVFINRKKRILLTSSDGALAQWRCAPTFESSNQYIAGAPIVNKEGALISVVTARVGNHYAVSSFEGDGGYFETPQPWKILDSSTGLIYGDRVFPTHEALKDFIATLGPAALGPDRPPTPVLVRGANPRVAFITKEGRQIAHNYLQGVISKGVEYL	264	Eukaryota; Metazoa; Ecdysozoa; Arthropoda; Hexapoda; Insecta; Pterygota; Neoptera; Holometabola; Lepidoptera; Glossata; Ditrysia; Yponomeutoidea; Plutellidae; Plutella
XP_026730193	XP_026730193.1	cabbage looper	uncharacterized protein LOC113495595 isoform X1 [Trichoplusia ni]	Trichoplusia ni	MLTMFSLLAFLIHSSIFVVSDGRYIMGRTVLNESNKGLVENFSIPAELHERDGKRFASFGTTVPIHCCTPEQVAEFANKTHHYCDVFTEQVLAPLDELVYVRIDENTAEKVFINRSKRILLVSSDGVLAQWRSAPTFESSNRFLAGTPIVNKDGDLVSVVTARKGNHYAVSTFEGEGGYFETSQPWKVLDPPEGAAVYGDRWFPSREEVRAYTLSLPGAAVSAGSPPAPVLHRGGSGRLVLADARGRQLSHHYLHGVATTDVQYL	265	Eukaryota; Metazoa; Ecdysozoa; Arthropoda; Hexapoda; Insecta; Pterygota; Neoptera; Holometabola; Lepidoptera; Glossata; Ditrysia; Noctuoidea; Noctuidae; Plusiinae; Trichoplusia
ALD88584	ALD88584.1		hypothetical protein HaSNPVNNg1_gp021 [Helicoverpa armigera nucleopolyhedrovirus]	Helicoverpa armigera nucleopolyhedrovirus	MLRQTCLFFAILASAIAAKSLQRYNVEYTIDNDLNRISIHKVDNRTVSINVIGHQSNDSDTLDRLHHFPGVATSVMFPRIDMSSALFVLLKNGAMARVIPEFVYTNYHVHKHRLVYSQLATFALEDRTVADMVLIGAPIFRNKKLVSVVTHRHDDRDAVMFPVTGVRPRNLVSGQIQFDSNNGVTPERLLTGRSVYGRRQMSYLPNERSVGIKEFALTSVANRDTFRNLTRNVHIFYNDDEIVITLSEGEFEISRIRFDGPLLYK	265	Viruses; Baculoviridae; Alphabaculovirus
AAD09281	AAD09281.1	fall webworm moth	immune-related Hdd13 [Hyphantria cunea]	Hyphantria cunea	MTTLFVFCILFVFRAEFSAEAYHVTMSKRTALNENYKGLVEELSIPAELHERDGKKYASFGSTIPIHSCSAEEIKRYANKTHHYCDVFTEQVLAPLGELVYVRLDENTAEKVFINRNKRILLVSSDGELAQWRCAPTFESPNSYIAGAPIVNKDGELVSVVTAKKGNHYAVSTFEGEGGYFDTAEPWRILDSPDGANIYGDKIFATRDQLRDYVSSVPASVVSAENPPVPVLHRGNSPRIILLAQNGRQISHQFLHGVITSDVEYL	266	Eukaryota; Metazoa; Ecdysozoa; Arthropoda; Hexapoda; Insecta; Pterygota; Neoptera; Holometabola; Lepidoptera; Glossata; Ditrysia; Noctuoidea; Erebidae; Arctiinae; Hyphantria
KPI98967	KPI98967.1	Asian swallowtail	hypothetical protein RR46_10285 [Papilio xuthus]	Papilio xuthus	MPQIRCRHQVHDVGLASFLHQLYTTMSKRTVLNEIYKGLVESICIPAELHHKNGKRYASFGTVVPIHCCTPEEVKERVNNTHHYCDVFAEELLAPLGELAFVRLDENTAEKVFINRSKRVLIVSSDGRLAQWRCAPTFESANHYIAGTPIVNKEGALVSVVTAKRGNHYAVSNFEGEGGYFETTLPWEMVHPMQGEVIYGDQTFSSRDELRKHLANLSPAEVTSDLPVRPVLLTGVTPRITLITHNGRQLAHYYLYGVHASDVQYL	266	Eukaryota; Metazoa; Ecdysozoa; Arthropoda; Hexapoda; Insecta; Pterygota; Neoptera; Holometabola; Lepidoptera; Glossata; Ditrysia; Papilionoidea; Papilionidae; Papilioninae; Papilio
ACH88673	ACH88673.1		p26-a [Helicoverpa armigera multiple nucleopolyhedrovirus]	Helicoverpa armigera multiple nucleopolyhedrovirus	MAWQTLTLAVTLCALTAAMTTTTHNTLYSVDHVAKTMQVHEVDGNRVNITVIPPNSDTNDDESLSMYHHFPGVATQVLFPPVTSSDDLYVQLSDGVLYKTRATRVFTNFHSHKGRMVYGQLLTIAVDDFSIAGMIYVGAPIYRDKKLVSVVTCRYDDYDAQTVLFPVSGIRPRGLVSGQFNFDDRIIVQELRRGMSVYGREQLPYQSAHMSVKQFALTTNNNKQAYRDLPRAIAVFHNANEITIALVEGQFEIDRVRFDGPLITPQ	266	Viruses; Baculoviridae; Alphabaculovirus
AFP95871	AFP95871.1		p26 [Mamestra brassicae multiple nucleopolyhedrovirus]	Mamestra brassicae multiple nucleopolyhedrovirus	MAWQTLTLAVTLCALTTAMTTTTHNTLYSVDHVAKTMQVHEVDGNRVNITVIPPNSDTNDDESLSMYHHFPGVATQVLFPPVTSSDDLYVQLSDGVLYKTRATRVFTNFHSHKGRMVYGQLLTIAVDDFSIAGMIYVGAPIYRDKKLVSVVTCRYDDYDAQTVLFPVSGIRPRGLVSGQFNFDDRIIVQELRRGMSVYGREQLPYQSAHMSVKQFALTTNNNKQAYRDLPRAIAVFHNANEITIALVEGQFEIDRVRFDGPLITPQ	266	Viruses; Baculoviridae; Alphabaculovirus
NP_689331	NP_689331.1		putative P26 [Mamestra configurata nucleopolyhedrovirus B]	Mamestra configurata nucleopolyhedrovirus B	MAWQTLTLAVTLCALTAAMTTTTYNTLYSVDHVAKTMQVHEVDGNRVNITVIPPNSDTNDDESLSMYHHFPGVATQVLFPPVTSSDDLYVQLSDGVLYKTRATRVFTNFHSHKGRMVYGQLLTIAVDDFSIAGMIYVGAPIYRDKKLVSVVTCRYDDYDAQTVMFPVSGIRPRGLVSGQFNFDDRIIVQELRRGMSVYGREQLPYQSAHMSVKQFALTTNNNKQAYRDLPRAIAVFHNVNEITIALVEGQFEIDRVRFDGPLITPQ	266	Viruses; Baculoviridae; Alphabaculovirus
YP_009011212	YP_009011212.1		p26 [Mamestra brassicae multiple nucleopolyhedrovirus]	Mamestra brassicae multiple nucleopolyhedrovirus	MAWQTLTLAVTLCALTAAMTTTTHNTLYSVDHVAKTMQVHEVDGNRVNITVIPPNSDTNDDESLSMYHHFPGVATQVLFPPVTSSDDLYVQLSNGVLYKTRATRVFTNFHSHKGRMVYGQLLTIAVDDFSIAGMIYVGAPIYRDKKLVSVVTCRYDDYDAQTVLFPVSGIRPRGLVSGQFNFDDRIIVQELRRGMSVYGREQLPYQSAHMSVKQFALTTNNNKQAYRDLPRAIAVFHNANEITIALVEGQFEIDRVRFDGPLITPQ	266	Viruses; Baculoviridae; Alphabaculovirus
AEN03946	AEN03946.1		P26 protein [Helicoverpa armigera NPV strain Australia]	Helicoverpa armigera NPV strain Australia	MLRQTCLFFAILASAIAAKSLQRYNVEYTIDNDLNRILIHKVDNRTVSINVIGHQSNDSNTLDRLHHFPGVATSVMFPRIDMTSALFVLLKNGAMARVVPEFVYTNYHVHKHRLVYSQLATFALEDRTVADMVLIGAPIFRNKKLVSVVTHRHDDRDRDAVMFPVTGIRPRNLVSGQIQFDSNNGVTPERLLTGRSVYGRRQMSYLPNERSVGIKEFALTSVANRATFRNLTRNVHIFYNDDEIVITLSEGEFEISRIRFDGPLLYK	267	Viruses; Baculoviridae; Alphabaculovirus
AF334030_91	AAL56166.1	HzSNPV	ORF21 [Helicoverpa zea single nucleopolyhedrovirus]	Helicoverpa zea single nucleopolyhedrovirus	MLRQTCLFFAILASAIGAKSLQRYNVEYTIDNDLNRILIHKVDNRTVSINVIGHQSNDSDTLDRLHHFPGVATSVMFPRIDMTSALFVLLKNGAMARVVPEFVYTNYHVHKHRLVYSQLATFALEDRTVADMVLIGAPIFRNKKLVSVVTHRHDDRDRDAVMFPVTGVRPRNLVSGQIQFDSNNGVTPERLLTGRSVYGRRQMSYLPNERSVGIKEFALTSVANRDTFRNLTRNVHIFYNDDEIVITLSEGEFEISRIRFDGPLLYK	267	Viruses; Baculoviridae; Alphabaculovirus
AGR57032	AGR57032.1		P26A [Choristoneura occidentalis alphabaculovirus]	Choristoneura occidentalis alphabaculovirus	MAMLKTFLLICVSSAALSVNVTTINNVLYTVNDTQKTIAVKQVDDKPAFIQVIPPQSFTKNQEELDMLHHFPGVASNVMFPRIANNTKLTVLLNNGSLATITVDRVYTNFHSHKNRMVYGQLYSFALSNFSLANQIYIGAPIFEKERMVSVITARHEDYKNKLVIYPVTGISARGLVSGQINFDLQILTQKLLEGSSVYGKMQLPYKALKDYAISTNRNKNLFKGLPRNVAVFYNERDITIALVEGEFEIDRIRLSGPLILRNNKQQ	267	Viruses; Baculoviridae; Alphabaculovirus
AIG63063	AIG63063.1		P26 [Helicoverpa SNPV AC53]	Helicoverpa SNPV AC53	MLRQTCMFFAILTSAIAAKSLQRYNVEYTIDNDLNRILIHKVDNRTVSINVIGHQSNDSDTLDRLHHFPGVATSVMFPRIDMTSALFVLLKNGAMARVVPEFVYTNYHVHKHRLVYSQLATFALEDRTVADMVLIGAPIFRNKKLVSVVTHRHDDRDRDAVMFPVTGVRPRNLVSGQIQFDSNNGVTPERLLTGRSVYGRRQMSYLPNERSVGIKEFALTSVANRDTFRNLTRNVHIFYNDDEIVITLSEGEFEISRIRFDGPLLYK	267	Viruses; Baculoviridae; Alphabaculovirus
AIG63200	AIG63200.1		P26 [Helicoverpa armigera SNPV]	Helicoverpa armigera SNPV	MLRQTCMFFAILASAIAAKSLQRYNVEYTIDNDLNRILIHKVDNRTVSINVIGHQSNDSDTLDRLHHFPGVATSVMFPRIDMTSALFVLLKNGAMARVVPEFVYTNYHVHKHRLVYSQLATFALEDRTVADMVLIGAPIFRNKKLVSVVTHRHDDRDRDAVMFPVTGVRPRNLVSGQIQFDSNNGVTPERLLTGRSVYGRRQMSYLPNERSVGIKEFALTSVANRDTFRNLTRNVHIFYNDDEIVITLSEGEFEISRIRFDGPLLYK	267	Viruses; Baculoviridae; Alphabaculovirus
AJP07174	AJP07174.1		p26 protein [Helicoverpa armigera nucleopolyhedrovirus]	Helicoverpa armigera nucleopolyhedrovirus	MLRQTCLFFAILASAIAAKSLQQYNVEYTIDNDLNRIFIHKVDNRTVSINVIGHQSNDSDTLDRLHHFPGVATSVMFPRIDMTSALFVLLKNGAMARVVPEFVYTNYHVHKHRLVYSQLATFALEDRTVADMVLIGAPIFRNKKLVSVVTHRHDDRDRDAVMFPVTGVRPRNLVSGQIQFDSNNGVTPERLLTGRSVYGRRQMSYLPNERSVGIKEFALTSVANRATFRNLTRNVHIFYNDDEIVITLSEGEFEISRIRFDGPLLYK	267	Viruses; Baculoviridae; Alphabaculovirus
AJP07309	AJP07309.1		p26 protein [Helicoverpa armigera nucleopolyhedrovirus]	Helicoverpa armigera nucleopolyhedrovirus	MLRQTCLFFAILASAIAAKSLQRYNVEYTIDNDLNRIFIHKVDNRTVSINVIGHQSNNSDTLDRLHHFPGVATSVMFPRIDMTSALFVLLKNGAMARVVPEFVYTNYHVHKHRLVYSQLATFALEDRTVADMVLIGAPIFRNKKLVSVVTHRHDDRDRDAVMFPVTGVRPRNLVSGQIQFDSNNGVTPERLLTGRSVYGRRQMSYLPNERSVGIKEFALTSVANRATFRNLTRNVHIFYNDDEIVITLSEGEFEISRIRFDGPLLYK	267	Viruses; Baculoviridae; Alphabaculovirus
AJP07579	AJP07579.1		p26 protein [Helicoverpa armigera nucleopolyhedrovirus]	Helicoverpa armigera nucleopolyhedrovirus	MLRQTCLFFAILASAIGAKSLQRYNVEYTIDNDLNRIFIHKVDNRTVSINVIGHQSNDSDTLDRLHHFPGVATSVMFPRIDMTSALFVLLKNGAMARVVPKFVYTNYHVHKHRLVYSQLATFALEDRTVADLVLIGAPIFRNKKLVSVVTHRHDDRDRDAVMFPVTGVRPRNLVSGQIQFDSNNGVTPERLLTGRSVYGRRQMSYLPNERSVGIKEFALTSVANRATFRNLTRNVHIFYNDDEIVITLSEGEFEISRIRFDGPLLYK	267	Viruses; Baculoviridae; Alphabaculovirus
AJP07715	AJP07715.1		p26 protein [Helicoverpa armigera nucleopolyhedrovirus]	Helicoverpa armigera nucleopolyhedrovirus	MLRQTCLFFAILASAIAAKSLQRYNVEYTIDNDLNRIFIHKVDNRTVSINVIGHQSNDSDTLDRLHHFPGVATSVMFPRIDMTSALFVLLKNGAMARVVPEFVYTNYHVHKHRLVYSQLATFALEDRTVADMVLIGAPIFRNKKLVSVVTHRHDDRDRDAVMFPVTGVRPRNLVSGQIQFDSNNGVTPERLLTGRSVYGRRQMSYLPNERSVGIKEFALTSVANRATFRNLTRNVHIFYNDDEIVITLSEGEFEISRIRFDGPLLYK	267	Viruses; Baculoviridae; Alphabaculovirus
BAG74586	BAG74586.1		hypothetical protein [Helicoverpa armigera NPV NNg1]	Helicoverpa armigera NPV NNg1	MLRQTCLFFAILASAIAAKSLQRYNVEYTIDNDLNRIFIHKVDNRTVSINVIGHQSNDSDTLDRLHHFPGVATSVMFPRIDMSSALFVLLKNGAMARVVPEFVYTNYHVHKHRLVYSQLATFALEDRTVADMVLIGAPIFRNKKLVSVVTHRHDDRDRDAVMFPVTGVRPRNLVSGQIQFDSNNGVTPERLLTGRSVYGRRQMSYLPNERSVGIKEFALTSVANRDTFRNLTRNVHIFYNDDEIVITLSEGEFEISRIRFDGPLLYK	267	Viruses; Baculoviridae; Alphabaculovirus
NP_075091	NP_075091.1		p26 [Helicoverpa armigera nucleopolyhedrovirus G4]	Helicoverpa armigera nucleopolyhedrovirus G4	MLRQTCLFFAILASAIAAKSLQRYNVEYTIDNDLNRILIHKVDNRTVSINVIGHQSNDSDTLDRLHHFPGVATSVMFPRIDMTSALFVLLKNGAMARVVPEFVYTNYHVHKHRLVYSQLATFALEDRTVADMVLIGAPIFRNKKLVSVVTHRHDDRDRDAVMFPVTGIRPRNLVSGQIQFDSNNGVTPERLLTGRSVYGRRQMSYLPNERSVGIKEFALTSVANRATFRNLTRNVHIFYNDDEIVITLSEGEFEISRIRFDGPLLYK	267	Viruses; Baculoviridae; Alphabaculovirus
NP_613241	NP_613241.1		p26 [Mamestra configurata nucleopolyhedrovirus A]	Mamestra configurata nucleopolyhedrovirus A	MAWQTLTLAVTLCALAAAMTTTTHDTVYSVDHVAKTMQVHEVDGKRVSITVIPPNSDTNDDESLSMYHHFPGVATQVLFPPVTSTDDLYVQLSDGVLYKTRASRVFTNFHSHKGRMVYGQLLTIAVDDLSIAGMIYVGAPIYRDKKLVSVVTCRYDDYDAQTVLFPVSGIRPRGLVSGQFNFDDRIIVQELRRGMSVYGREQLPYQSAHMSVKQYALTTNNNKQAYRDLPRAIAVFHNANEITIALVEGQFEIDRVRFDGPLITPQK	267	Viruses; Baculoviridae; Alphabaculovirus
NP_848319	NP_848319.1		p26 [Choristoneura fumiferana multiple nucleopolyhedrovirus]	Choristoneura fumiferana multiple nucleopolyhedrovirus	MAMLKTFLLICVSSAALSVKVTTINNVLYTVNDTQKTIAVKQVDDKPAFIQVIPPQSFTKNQEELDMLHHFPGVASNVMFPRIANNTKLTVLLSDGSLATITVDRVYTNFHSHKNRMVYGQLYSFALSNFSLANQIYIGAPIFEKERMVSVITARHEDYKNKLVIYPVTGISARGLVSGQINFDLQILTQKLLEGSSVYGKMQLPYKALKDYAISTNRNKNLFKGLPRNVAVFYNERDITIALVEGEFEIDRIRLSGPLILRNIKQQ	267	Viruses; Baculoviridae; Alphabaculovirus
QBM78987	QBM78987.1		p26 [Helicoverpa armigera nucleopolyhedrovirus]	Helicoverpa armigera nucleopolyhedrovirus	MLRQTCLFFAILASAIAAKSLQRYNVEYTIDNDLNRILIHKVDNRTVSINVIGHQSNDSDTLDRLHHFPGVATSVIFPRIDMTSALFVLLKNGAMARVVPEFVYTNYHVHKHRLVYSQLATFALEDRTVADMVLIGAPIFRNKKLVSVVTHRHDDRDRDAVMFPVTGVRPRNLVSGQIQFDSNNGVTPERLLTGRSVYGRRQMSYLPNERSVGIKEFALTSVANRDTFRNLTRNVHIFYNDDEIVITLSEGEFEISRIRFDGPLLYK	267	Viruses; Baculoviridae; Alphabaculovirus
YP_008378498	YP_008378498.1		P26A [Choristoneura rosaceana nucleopolyhedrovirus]	Choristoneura rosaceana nucleopolyhedrovirus	MAMLKTFLLICVSSAALSVKVTTINNVLYTVNDTQKTIAVKQVDDKPAFIQVIPPQSFTKNQEELDMLHHFPGVASNVMFPRIANNTKLTVLLNDGSLATITVDRVYTNFHSHKNRMIYGQLYSFALSNFSLANQIYIGAPIFEKERMVSVITARHEDYKNKLVIYPVTGISARGLVSGQINFDLQILTQKLLEGSSVYGKMQLPYKALKDYAISTNRNKNLFKCLPRNVAVFHNERDITIALVEGEFEIDRIRLSGPLILRNNIQQ	267	Viruses; Baculoviridae; Alphabaculovirus
AXU41725	AXU41725.1		P26 [Spodoptera eridania nucleopolyhedrovirus]	Spodoptera eridania nucleopolyhedrovirus	MGFASFVLVLVAVCSASPTMAAFNTKYAIDHESRTMKVYSVDDRPVSIFVIPPNSDTNGDDKLTSLHQFPGVASSVVFPSISRDDDLFVELSNGVLYKTQATLVYTNFHTHKNRMVYGQLLTFAIDEFDIASKIYVGAPIYRDGKLVSVVTCRFDDYDKGLVLFPVTGVRPAGLISGQMMFDDRVIVERLKPNMAVYGRQQLPYRSAHMSVKQFALAATVNRQLYRDLPRYAVVFYNDTDITITMVEGEFEIQRVRLDGPLITNQQG	267	Viruses; Baculoviridae; Alphabaculovirus; unclassified Alphabaculovirus
QEI03490	QEI03490.1		P26-A [Spodoptera cosmioides nucleopolyhedrovirus]	Spodoptera cosmioides nucleopolyhedrovirus	MMGFSSFVLLVVCCSTSLTMAAFNVKYAIDHEARTMTVQSVDDKPVSIFVIPPNSDTNGDDKLTSLHQFPGVASSVVFPSISRDDDLFVELNNGILYKTQATRVYTNFHTHKNRMVYGQLLTFAIDEFDLANKIYVGAPIYRDGKLVSVVTCRFDDYDKGLVLFPVTGVRPAGLISGQMMVDDRVIVEKMKPDMSVYGRQQLPYRSAHMSVKQFALAVTVNRQLYRDLPRFAVVFHNDTDITITMVEGEFEMYRVRLDGPLITNQQG	267	Viruses; Baculoviridae; Alphabaculovirus; unclassified Alphabaculovirus
YP_002332831	YP_002332831.1		P26 [Spodoptera litura nucleopolyhedrovirus II]	Spodoptera litura nucleopolyhedrovirus II	MGFASFVLVLVAVCSASPTMAAFNTKYAIDHESRTMKVYSVDDRPVSIFVIPPNSDTNGDDKLTSLHQFPGVASSVVFPSISRDDDLFVELSNGVLYKTQATLVYTNFHTHKNRMVYGQLLTFAIDEFDIANKIYVGAPIYRDGKLVSVVTCRFDDYDKGLVLFPVTGVRPAGLISGQMMFDDRVIVERLKPNMAVYGRQQLPYRSAHMSAKQFALAATVNRQLYRDLPRYAVVFYNDTDITITMVEGEFEIHRVRLDGPLITNQQG	267	Viruses; Baculoviridae; Alphabaculovirus; unclassified Alphabaculovirus
AKD28026	AKD28026.1		IV structural protein P26 [Glypta fumiferanae]	Glypta fumiferanae	MAEGFEFAGVQFTFNNGNKTAKVFRHRDLPVDVHILPANTNEITRAARAHLRPETSLHQFPAVATSYIFPAVVAGENIKVIRNDGTALQAALTTTRVLFHAYGRRLIWSQLLAFVVETRDEADSIYQGSPIFRASDNAFVSVITHREQMFLETSSGEKIFSGYVFPVTGLKPKNFVSGETEIYPGGSFVVRKIEDGMSVYGMQMLPYAEIKAFAQSIQFVPSCNLPRNTAVYHNRFETNVRPRRRQTRNFQVPRVLSAVKNLLTCPRF	268	Eukaryota; Metazoa; Ecdysozoa; Arthropoda; Hexapoda; Insecta; Pterygota; Neoptera; Holometabola; Hymenoptera; Apocrita; Terebrantes; Ichneumonoidea; Ichneumonidae; Banchinae; Glypta
XP_013143912	XP_013143912.1	common Mormon	PREDICTED: uncharacterized protein LOC106107572 isoform X1 [Papilio polytes]	Papilio polytes	MDLRVKALYLVVFSTTFNIILADECTTMSKRTVLNEVYKGLVESMSIPAEVHHRNGKKYASFGTVVPIHCCTPEQVKERVNDTHHYCDVFTEELLAPLGELAFVRLDENTAEKVFINRSKRVLMVSSDGRLAQWRCAPTFESANHYIAGTPIVNKEGALVSVVTAKRGNHYAVSNFEGEGGYFETSLPWEIVHPMQGEVIYGEQTFSSRDELRKHLANLSPAEVTSDLPVRPVLLTGVTPRLTLITHNGRQLAHYYLYGVHASDVQYL	268	Eukaryota; Metazoa; Ecdysozoa; Arthropoda; Hexapoda; Insecta; Pterygota; Neoptera; Holometabola; Lepidoptera; Glossata; Ditrysia; Papilionoidea; Papilionidae; Papilioninae; Papilio
NP_818678	NP_818678.1		P26 [Adoxophyes honmai nucleopolyhedrovirus]	Adoxophyes honmai nucleopolyhedrovirus	MIQSIVTLLCLALIATPGTALTVNNVEYTINHLEKTITVTQVDEKTCIIKTFPPLGSTDNQEEYDMLHHFPGVATSVLFPSIKNSSMLSVLLNDGTTFSAVADKVYTNFHSHKKRMVYGQLLSFAVEDLNLANKIYIGAPIFLNNKLISVVTARHDNYEEGLVIYPVTGIRPDNLVSGQFNFDDQIIVTQFVKGMSVYGKRQLPYMALKRHAINISANKKLYRNMPRSVAVFYNDRDITIALVEGEYEIDRIRLNGPLLAGHTPTPSI	268	Viruses; Baculoviridae; Alphabaculovirus
YP_002300548	YP_002300548.1		P26 [Adoxophyes orana nucleopolyhedrovirus]	Adoxophyes orana nucleopolyhedrovirus	MIQSIVTLLCLALIATPGTALTVNNVEYTINHLEKTITVTQVDEKTCIIKTFPPLGSTGDQEEYDMLHHFPGVATSVLFPSIKNNSMLSVLLNDGTTFSAVADRVYTNFHSHKKRMVYGQLLSFAIEDFNLANKIYIGAPIFLNNKLISVVTARHDNYKEGWVIYPVTGIRPDNLVSGQFNFDNQIIVTQFVKGMSVYGKRQLPYMALKRYAINTSANKKLYRNMPRSVAVFYNDQDITIALVEGEYEIDRIRLNGPLLAGYTPTPSI	268	Viruses; Baculoviridae; Alphabaculovirus; unclassified Alphabaculovirus
AYN45077	AYN45077.1		p26b [Spodoptera exigua multiple nucleopolyhedrovirus]	Spodoptera exigua multiple nucleopolyhedrovirus	MYLKTLSVVLLYLSTKLTMAANVKYEIDHDKRIIQIKSVNDQAVSVTVIPPNSNNDDDNLSMLHHFPGVATSVTFPPISPDDALYVQLNNGVLYRVYADRVYTNFHTHKKRLIYGQLLTFAVDDFSISSKIYVGAPIYRDNVLVSVITCRYDDYDADLVMFPVTGIRAHGLVSGQINYDSDNIIVEKLKPEMSVYGRRQLPYKSAHMSVKHFALSTHMNREIYRNLPRLVSIFYNEKEVSIGAVEGEFEMFRVRLDGPLITDQEKEQEE	269	Viruses; Baculoviridae; Alphabaculovirus
AXS67674	AXS67674.1		p26 [Cryptophlebia peltastica nucleopolyhedrovirus]	Cryptophlebia peltastica nucleopolyhedrovirus	MIIKRTMTFLLLLLLCIRNGQNLEINNVNYEKNELKKTVTITKVDGQESFIKIIAPMSRVHDEEYGLLHQFPGVASNIVFPKVSNNSALDVLLNNGDLASFTVDRVYANFHIHKQRLIYGQMYAFALTDFSLANKIYLGAPVFRENRLISVITCRHNDYKNGLVIFPITGIRPEKLVSGQMNFDKSVSFHKFLQGMSVYGTKQLPYVGDSSFMLKRYALTVDQNKNTYRDLPRNINVFYNDHEIVITLSEGEYEIDRVRFDGPLISYNT	269	Viruses; Baculoviridae; Alphabaculovirus; unclassified Alphabaculovirus
YP_002268179	YP_002268179.1	AgipMNPV	P26 [Agrotis ipsilon multiple nucleopolyhedrovirus]	Agrotis ipsilon multiple nucleopolyhedrovirus	MASATASMLVWAICSAATMAAMATPNNVKYTVNHEARTMQVHTVDDRPVSIHVIPPNSETNGDDKLSVLHQFPGVATDVLFPAISADDVLFVQLSNGVLYQTRASRVYTNFHTHKGRMVYGQLRTFVLDDFEIASQIYIGAPIYLNHKLVSVVTCRFDDYEAGLVMFPVTGIRSRGLVSGQFNIDDRVIVQELRPNMSVYGRQQLPYDSAHMSVKQFALSTNANRQAYRDLPRAVAVFHNKREITMALVEGEFEVDRLRFDGPLITAQRYEE	272	Viruses; Baculoviridae; Alphabaculovirus
XP_021193734	XP_021193734.1	cotton bollworm	uncharacterized protein LOC110378694 isoform X1 [Helicoverpa armigera]	Helicoverpa armigera	MAVVYLIVFLSALSSALTANLNARMSQRTGFPTSNGPAGLTYRGLVERMAIPAELHRRADGRQYASFGDARPIHCCTPEQVEKLSQTTHHYCDIFTEQLLAPLGELGYVRIDENTAEKVFINRSKRLLVVSSDGVLAQWRLAPTFESANLYVAGTPVVNQAGELVSLVTAKRGNHYAVSTFEGEGGYFDTSEAWQVRDIPEGRGVYGDRTFPSRDELRAYVSSLPPIDAPPTGPPTPILWRGATPRLVLLAKNGRQISHQYLHGVSADNIEYL	273	Eukaryota; Metazoa; Ecdysozoa; Arthropoda; Hexapoda; Insecta; Pterygota; Neoptera; Holometabola; Lepidoptera; Glossata; Ditrysia; Noctuoidea; Noctuidae; Heliothinae; Helicoverpa
QBI90242	QBI90242.1	TnSNPV	p26 [Trichoplusia ni single nucleopolyhedrovirus]	Trichoplusia ni single nucleopolyhedrovirus	MLTMASATTATPSTSLTKTAKTKFNVQYDIDENEKRIRVLAVDGKTVRIETIRPHSDSENIKSADDQLPLSVLHHFPGVASEIVFPAIENPNDSLLVLLNDGILFKVEPTRVYTNFHKHANRLIYGQLRTFAIDDLWIAEKIWIGAPIFSNGRLVSVITCRYDDYDAGIVLFPVSGIRPKGLVSGQINYDSTVYVSSLRDGMSVYGKRQMAYSSPYMTVKKFALSTTANRLTYRDLPRNVAIFHNKNEISISLVEGEYEIDRIRLDGPLIVPQ	273	Viruses; Baculoviridae; Alphabaculovirus
QAT90415	QAT90415.1		P26 [Spodoptera exempta nucleopolyhedrovirus]	Spodoptera exempta nucleopolyhedrovirus	MDPRILSVLIAILSTTTTTMAANVEYEIDHDKQIMQIKSVNDQAVSVVIIPPNGNNDDDKLSMLHHFPGVATSVTFPPLSPDDALYVQLSNGVLYRVFADRVYTNFHTHKKRLIYGQLLAFTVDDFSIASKIYIGAPIYRNNVLVSVITCRYYDYDADLVMFPVTGVRPHGLVSGQIVYDNDHVFVEKLRADMSVYGRRQLPYQSAHMSVKHFALSTHMNREIYRNLPRSVMIFHNEKEVSVAVVEGEFEMFRVRLDGPLITNQEKEKDDDMK	273	Viruses; Baculoviridae; Alphabaculovirus; unclassified Alphabaculovirus
YP_009666799	YP_009666799.1		P26 [Mythimna unipuncta nucleopolyhedrovirus]	Mythimna unipuncta nucleopolyhedrovirus	MISAFSFALILMAAAATTTSSLSISSPTMEEIYNVKFSVDHSKRTMRVVSVDNEDVLVKVVPPHGATNGADEYSLAHQFPGVVTQVMFPAVSRDDDLYVMLSNGVLMRTHATRVYANFHVHSNRFIYGQLLSFVVDDFSLAAKIYIGAPIFRNKKLVSVVTCRYDEYDEGVVVFPVSGVRPRRLVSGQYMFDDRVVVQELRENNSVYGRRQLPYASVKNFAIAADNNRNEHRDLPRIVGVFYNERDVTVTLSEGDFEIDRVRFDGPLIVPQEEK	274	Viruses; Baculoviridae; Alphabaculovirus
YP_006607871	YP_006607871.1		p26-a [Apocheima cinerarium nucleopolyhedrovirus]	Apocheima cinerarium nucleopolyhedrovirus	MHFIKVIFLMTINILYLTTAEIKTIYNVDYVIDEATKTIKIVSVDKQPSNIIIVTPNGHTNRHEQYDVMHHYPGVVSDVILPGVPNERSIMHVLLNDGTLVRAVGEHVYTNFHTHKERMIYGQLRTFALDDFSLADKIYLGAPVFVDKKLVSVITCRYDDYTNGLVMYPVTGTRSKGLISGQINYDDKVIVNVLRPSMSVYGRNQLPYSPDSINAVSIKRLAISVSNNRQIYRDLPRSVVVFHNENDIFINLVEGDFEIEKIRFDGPMVVPQSI	274	Viruses; Baculoviridae; Alphabaculovirus; unclassified Alphabaculovirus
YP_009002595	YP_009002595.1		hypothetical protein [Inachis io cypovirus 2]	Inachis io cypovirus 2	MQRMQLVNKQNLINYIAHSIIEEGLVDDVEAGASKNHLPKMPNPSDIEKAKLNPYHEVKDETRKDDIKENLVLATNETAFLAKTRHHYTGFYSKHILKPVPSDGIVMVNDTPYKTGSVKKVANAQKNGESTIITFEPCLFTTDNLPAGSIVKDAEGGEYGMITSHYEAFNKRKAYPIQNAFEYPSIMVSVPCEHRVKEKLMAYADKQFDKKGDLVAYIESLGPKPDIGAIIYTDKYNKNPQLVVHANGHQIINMHLRKRIVGSFIAKAPYQPDN	274	Viruses; Riboviria; Orthornavirae; Duplornaviricota; Resentoviricetes; Reovirales; Reoviridae; Spinareovirinae; Cypovirus
YP_529812	YP_529812.1		P26 [Agrotis segetum nucleopolyhedrovirus A]	Agrotis segetum nucleopolyhedrovirus A	MTSASICATFVACAWLISVAMAAPNVLYTVNDEARTIKVHTVDNSPVSVNVIPPGGNTNGDDRLSALHQFPGVATDVLFPAVSADDVLFVQLSNGVLFRTRATRVLVNFHTHKNRMIYGQLLSFEVDDFEVANKIYIGAPIYRNYKLVSVVTCRYDDFEAGLVLFPVTGIRPRGLVSGQFNFDGGNVLVQQLRPNMSVYGKQQLPYNSAHMSVKQFALTTSANKQAYRDLPRTIAVFHNQREITIALVEGEFEIDRVRFDGPLVVDQTKNGDGEK	275	Viruses; Baculoviridae; Alphabaculovirus
CDG73033	CDG73033.1		p26 (Ac136) [Spodoptera exigua multiple nucleopolyhedrovirus]	Spodoptera exigua multiple nucleopolyhedrovirus	MMSFASFLLVLICSASSTMAAFNVKYVVDHEARTMIVQSVDGRPVSIFVIPPNSDTNGDDKLTWLHQFPGVATSVAFPSISQNDDLLVQLNNGVLYKTRATRVYTNFHTHKNRMVYGQLLTFAVDEFDIANKIYVGAPIFRAGEMVSVVTCRFDDYEKGLVVFPVAGMRPAGLISGQMMFDDRVIVKKLKADMAVYGRQQLPYSSAHMSAKQFAMAATVNRQLYRDLPRYAVVFHNNTDITITMVEGEFEMYRVRLDGPLITNQNKDDDDDSIGNIV	277	Viruses; Baculoviridae; Alphabaculovirus
CDG73170	CDG73170.1		p26 (Ac136) [Spodoptera exigua multiple nucleopolyhedrovirus]	Spodoptera exigua multiple nucleopolyhedrovirus	MMSFASFLLVLICSASSTMAAFNVKYVVDHEARTMIVQSVDGRPVSIFVIPPNSDTNGDDKLTWLHQFPGVATSVAFPSISQNDDLLVQLNNGVLYKTRATRVYTNFHTHKNRMVYGQLLTFAVDEFDIANKIYVGAPIFRAGEMVSVVTCRFDDYEKGLVVFPVAGMRPAGLISSQMMFDDRVIVKKLKADMAVYGRQQLPYSSAHMSAKQFAMAATVNRQLYRDLPRYAVVFHNNTDITITMVEGEFEMYRVRLDGPLITNQNKDDDDDSIGNIV	277	Viruses; Baculoviridae; Alphabaculovirus
NP_037889	NP_037889.1		ORF129 p26 [Spodoptera exigua multiple nucleopolyhedrovirus]	Spodoptera exigua multiple nucleopolyhedrovirus	MMGFASFLLVLICSASSTMAAFNVKYVVDHEARTMIVQSVDGRPVSIFVIPPNSDTNGDDKLTWLHQFPGVATSVAFPSISQNDDLLVQLNNGVLYKTRATRVYTNFHTHKNRMVYGQLLTFAVDEFDIANKIYVGAPIFRAGEMVSVVTCRFDDYEKGLVVFPVAGMRPAGLISGQMMFDDRVIVKKLKADMAVYGRQQLPYSSAHMSAKQFAMAATVNRQLYRDLPRYAVVFHNNTDITITMVEGEFEMYRVRLDGPLITNQNKDDDDDDSIGNIV	278	Viruses; Baculoviridae; Alphabaculovirus
YP_001650930	YP_001650930.1		p26-a [Orgyia leucostigma nucleopolyhedrovirus]	Orgyia leucostigma nucleopolyhedrovirus	MNMVWSDRVILLVVTAITMLAIDAAALSVGNVKYSIDRATKTIDVYSVNNASSVFKIVEPGGRAPPDERFDAMHHFPGVITNTVLIGAQDVHTNLNVLLANEKLLQITPTRVYVNYHTHKQRMVYGQLRAFVLDDFELANQVYIGAPILSADGDLVSVVTCRFDDYRDGVVVFPVSGVRSPGLTSGQIQFDDKVTVNELDATMSVYGRMQLPYNVDSTHELNVKRFAISINNNRRMYRDWPRTVVVFHNRRDVTISLVEGEFEMFKMRLDGPLLRSQL	278	Viruses; Baculoviridae; Alphabaculovirus
ACB32174	ACB32174.1		P26 [Ampelophaga rubiginosa nucleopolyhedrovirus]	Ampelophaga rubiginosa nucleopolyhedrovirus	MSSTIFKTLAIYILYAMIASSQAHDTNVIHNVIYTVNDVQRTINIQMVDGKEAQIVVIPPHSNTNNDDRLDMLHHFPGVATDIILPPIQANDMVEILLNDHVLWRTGVDANVFTNYHTHKNRLVFGQLRAVVVKDFTLADQIYIGAPVFKEKRLISVITCRFDDYTNQQVIFPLTGLRTAGLVSGQINYDDSVTVQQLKPGLSVYGRRQLPYKSNEALGQANIKRFAISTQNNRLAYRDLPRNVVFFHDQHNITITINENEFEIARFRFDGPLILPQN	278	Viruses; Baculoviridae; Alphabaculovirus; unclassified Alphabaculovirus
XP_022831420	XP_022831420.1		uncharacterized protein LOC111359938 isoform X1 [Spodoptera litura]	Spodoptera litura	MVALLYSLVVLWVVNVCHSSLLTRTVTTMSKRTGFPNTTAPAAAGLTYRGIVENMSIPAELHQRPDGRPYATFGSVVPIHCCTPEQVEQHRKTTHHYCDIFTDETLAPLGDLVYVRIDENTAEKVFINRRQRVLLVSSDGVLAQWRLAPTFESANLYLAGTPIVDQAGHLVSVVTAKWGRHYAVSAIEGEGGYFDTSLPWETLTIPEGSSVYGNRTFQSRDELREYVASLPPAGSPAAGEVSPLLYRGDSPRLVLVSPSGRQLSHHYLHGVIANDVEYL	279	Eukaryota; Metazoa; Ecdysozoa; Arthropoda; Hexapoda; Insecta; Pterygota; Neoptera; Holometabola; Lepidoptera; Glossata; Ditrysia; Noctuoidea; Noctuidae; Amphipyrinae; Spodoptera
XP_022120734	XP_022120734.1	cabbage white	uncharacterized protein LOC110997070 isoform X1 [Pieris rapae]	Pieris rapae	MVLSIVLFVLVTSADVSEDFHILSHTEPLSPRSVQNKSDDMSQRTVLNEQYKGLVERMSVPVELHEREGRRYATCASLVPIHCCTTEQKAELSVSTHHYCDVFTEQVLAHLAELAYVRLDADTAEKVFLNRTKRILLVSSDGKLAQWRCAPTFESANNYIAGAPIVNKDGSIVSIVTAKRGNHYAVSNAEGEGGYFETSKPWEIIDTGDAKFVYADKTFSTREELRAYINSLPPASLASPPRPLLIRGNSPRVALVAENGRQLVHIYLSGVLVNDVQYL	279	Eukaryota; Metazoa; Ecdysozoa; Arthropoda; Hexapoda; Insecta; Pterygota; Neoptera; Holometabola; Lepidoptera; Glossata; Ditrysia; Papilionoidea; Pieridae; Pierinae; Pieris
ACA02687	ACA02687.1		P26 [Spodoptera frugiperda multiple nucleopolyhedrovirus]	Spodoptera frugiperda multiple nucleopolyhedrovirus	MYKMISVLEILVVAFTLCVSTSPLSTMATFNVKYTVDHETKRINVNSVLDAPVSIHVIPPNSDTNGDEKLTLLHQFPGVATNIIFPSITKDDDLYVQLNNGVLYKTRATRVYTNFHTHKNRMVYGQLYTIAVDDFEIANKIYIGAPIYRNKQLVSVITCRFDDYEAGLVMYPVTGIRPQGLISGQIQYDDRVGVETLRPSMSVYGRQQLPYKSAHMSVKQFAMTADMNRQLYRDLPRSVMLFHNNKEITITVVEGEFEMYRIRLDGPLVTNQESSNEEK	279	Viruses; Baculoviridae; Alphabaculovirus
CDG72470	CDG72470.1		p26 (Ac136) [Spodoptera exigua multiple nucleopolyhedrovirus]	Spodoptera exigua multiple nucleopolyhedrovirus	MMSFASFLLVLICSASSTMAAFNVKYVVDHEARTMIVQSVDGRPVSIFVIPPNSDTNGDDKLTWLHQFPGVATSVAFPSISQNDDLLVQLNNGVLYKTRATRVYTNFHTHKNRMVYGQLLTFAVDEFDIANKIYVGAPIFRAGEMVSVVTCRFDDYEKGLVVFPVAGMRPAGLISGQMMFDDRVIVKKLKADMAVYGRQQLPYSSAHMSAKQFAMAATVNRQLYRDLPRYAVVFHNNTDITITMVEGEFEMYRVRLDGPLITNQNKDDDDNDDSIGNIV	279	Viruses; Baculoviridae; Alphabaculovirus
YP_001036423	YP_001036423.1		p26b [Spodoptera frugiperda multiple nucleopolyhedrovirus]	Spodoptera frugiperda multiple nucleopolyhedrovirus	MYKMISVLEILVVAFTLCVSTSPLSTMATFNVKYTVDHETKRINVNSVLDAPVSIHVIPPNSDTNGDEKLTLLHQFPGVATNVIFPSITKDDDLYVQLNNGVLYKTRATRVYTNFHTHKNRMVYGQLYTIAVDDFEIANKIYIGAPIYRNKQLVSVITCRFDDYEAGLVMYPVTGIRPQGLISGQIQYDDRVGVETLRPSMSVYGRQQLPYKSAHMSVKQFAMTADMNRQLYRDLPRSVMLFHNNKEITITVVEGEFEMYRIRLDGPLVTNQESSNEEK	279	Viruses; Baculoviridae; Alphabaculovirus
AF358416_3	AAK51839.1		p26 protein [Trichoplusia ni single nucleopolyhedrovirus]	Trichoplusia ni single nucleopolyhedrovirus	MIQSQFILSFMLTIASASMASTPTTTRRTKLNVEYSIDENEKIIRVVAVDGKAVRIETIRPHSDSNYIKTGDDQPPLSVLHHFPGVAAILCSGIDNSNDSLRVLLNDGILFRVQPGHVYTNFHRHANRLIYGQLRTFAVDDLWIADKIWIGAPIFFNDRLVSVITCRYDDYDAGIVLFPVSGIRPKGLVSGQINYDSTVYVSLLRNGMSVYGKRQMAYSSPYMTVKKFALSTTANRLTYRDLPRNIAIFHNKKERKPSLWWKANTKYTDLDWTAPLIVPQ	280	Viruses; Baculoviridae; Alphabaculovirus
YP_009112700	YP_009112700.1	AgseNPV-B	p26b [Agrotis segetum nucleopolyhedrovirus B]	Agrotis segetum nucleopolyhedrovirus B	MMQMISALYKNGERDRFNVIISHLLDGDGSDGDAEQRAIYRQSRGANHASAHCRRQAGVDSRDSAEQRYQRRRQAHRAAPVSGRRYRRSVSRRFGGRRAFVQLGNGVLYQTRASRVYTNFHTHKNRMIYGQLRTFAVDDFEIASQIYIGAPIYLNYKLVSVVTCRFDDYEAGLVMFPVTGIRSRGLVSGQFNIDDRVIVQELRPNMSVYGRQQLPYDSAHMSVKKFALSTNANRLAYRDLPRAVAVFHNEREITMALVEGEFEVDRLRFDGPLITAQQRSEE	282	Viruses; Baculoviridae; Alphabaculovirus
YP_009250006	YP_009250006.2		P26a [Urbanus proteus nucleopolyhedrovirus]	Urbanus proteus nucleopolyhedrovirus	MCCTKQIAVLLFLCAAAAHSKVHLNAYRVKCSVDHDTKKIDIDQINGQNYNFVVVPPHQETTASDLFDYYHQFPGLVTDYNFHSFNINDTLKVLLSDGKFLHVLAHDKVLFNFHVHKNRMIFGQMVSFSVNDRSIASKIYVGAPVFRALDHKLVSVITCNELVHKTDGERVIFPLTGVRHEHLSSGHVSFDGEYVVSQKVHGLSIYGRQQLPYTNNELYHTNVKQYAINIMNNQRVYRNDPRTVTVYYDDEEIDLVLTEGEFEIMRFRIDGGLVNAIQNISKI	283	Viruses; Baculoviridae
AOL56456	AOL56456.1		P26a [Chrysodeixis includens nucleopolyhedrovirus]	Chrysodeixis includens nucleopolyhedrovirus	MIQSQLILSLMLTIASTSIMSTQTTRTVTTKSKFNVEYSVDENEKKIRVVAVDGKTVRIETVRPHSDTNDIKTADDQLPLSALHHFPGAVSEIVFPAIDNSNDSLMVLLNDGILLKVEPTHIYTNFHKHDNRLIYGQLRTFAVDDLWIAEKIYIGAPIFFNNRLVSVVTCRYDDYDAGIVLFPVSGIRPKGLVSGQINYDSNVYVNSLRNGMSVYGKRQMAYSSPYMSVKKFALSTAANRLTYRDLPRNVAIFHNKKEITISLVEGEYEITRIRLDGPLIVPE	283	Viruses; Baculoviridae; Alphabaculovirus
AOL57023	AOL57023.1		P26a [Chrysodeixis includens nucleopolyhedrovirus]	Chrysodeixis includens nucleopolyhedrovirus	MIQSQLILSLMLTIASTSIMSTQTTRTVTTKSKFNVEYSVDENEKKIRVVAVDGKTVRIETVRPHSDTNDIKTADDQLPLSALHHFPGAVSEIVFPAIDNSNDSLMVLLNDGILLKVEPTHVYTNFHKHDNRLIYGQLRTFAVDDLWIAEKIYIGAPIFFNNRLVSVVTCRYDDYDAGIVLFPVSGIRPKGLVSGQINYDSNVYVNSLRNEMSVYGKRQMAYSSPYMSVKKFALSTAANRLTYRDLPRNVAIFHNKKEITISLVEGEYEITRIRFDGPLIVPE	283	Viruses; Baculoviridae; Alphabaculovirus
QGW49432	QGW49432.1		P26a [Chrysodeixis includens nucleopolyhedrovirus]	Chrysodeixis includens nucleopolyhedrovirus	MIQSQLILSLMLTIASTSIMSTQTTRTVTTKSKFNVEYSVDENEKKIRVVAVDGKTVRIETVRPHSDTNDIKTADDQLPLSALHHFPGAVSEIVFPAIDNSNDSLMVLLNDGILLKVEPTHIYTNFHKHDNRLIYGQLRTFAVDDLWIAEKIYIGAPIFFNNRLVSVVTCRYDDYDAGIVLFPVSGIRPKGLVSGQINYDSNVYVNSLRNEMSVYGKRQMAYSSPYMSVKKFALSTAANRLTYRDLPRNVAIFHNKKEITISLVEGEYEITRIRLDGPLIVPE	283	Viruses; Baculoviridae; Alphabaculovirus
QGW49572	QGW49572.1		P26a [Chrysodeixis includens nucleopolyhedrovirus]	Chrysodeixis includens nucleopolyhedrovirus	MIQSQLILSLMLTIASTSIMSTQTTRTVTTKSKFNVEYSVDENEKKIRVVAVDGKTVRIETVRPHSDTNDIKTADDQLPLSALHHFPGAVSEIVFPAIDNSNDSLMVLLNDGILLKVEPTHIYTNFHKHDNRLIYGQLRTFAVDDLWIAEKIYIGAPIFFNNRLVSVVTCRYDDYDAGIVLFPVSGIRPKGLVSGQINYDSNVYVNSLRNGMSVYGKRQMAYSSPYMSVKKFALSTAANRLTYRDLPRNVAIFHNKKEITISLVEGEYEITRIRFDGPLIVPE	283	Viruses; Baculoviridae; Alphabaculovirus
YP_308908	YP_308908.1		orf19 [Trichoplusia ni single nucleopolyhedrovirus]	Trichoplusia ni single nucleopolyhedrovirus	MIQSQLILSLMLTMASATTATPSTSLTKTAKTKFNVQYDIDENEKRIRVLAVDGKTVRIETIRPHSDSENIKSADDQLPLSVLHHFPGVASEIVFPAIENPNDSLLVLLNDGILFKVEPTRVYINFHKHANRLIYGQLRTFAIDDLWIAEKIWIGAPIFSNGRLVSVITCRYDDYDAGIVLFPVSGIRPKGLVSGQINYDSTVYVSSLRDGMSVYGKRQMAYSSPYMTVKKFALSTTANRLTYRDLPRNVAIFYNKNEISISLVEGEYEIDRIRLDGPLIVPQ	283	Viruses; Baculoviridae; Alphabaculovirus
YP_009116933	YP_009116933.1	PsinSNPV-IE	P26a [Pseudoplusia includens SNPV IE]	Pseudoplusia includens SNPV IE	MIQSQLILSLMLTIASTSIMSTQTTRTVTTKSKFNVEYSVDENEKKIRVVAVDGKTVRIETVRPHSDTNDIKTADDQLPLSALHHFPGAVSEIVFPAIDNSNDSLMVLLNDGILLKVEPTHVYTNFHKHDNRLIYGQLRTFAVDDLWIAEKIYIGAPIFFNNRLVSVVTCRYDDYDAGIVLFPVSGIRPKGLVSGQINYDSNVYVNSLRNGMSVYGKRQMAYSSPYMSVKKFALSTAANRLTYRDLPRNVAIFHNKKEITISLVEGEYEITRIRFDGPLIVPE	283	Viruses; Baculoviridae; Alphabaculovirus
ANS70918	ANS70918.1		protein p26 [Lymantria dispar multiple nucleopolyhedrovirus]	Lymantria dispar multiple nucleopolyhedrovirus	MKSMMSFLLLLSLLSLCGFAAAGADDHNVPVNYAVDKDSRTIFVNFVNNRRVDIRVISPFERLSASMIAAAATTTTASQQNYYYPGVMSDVSFSPMVGIDDELQILLANGTLFRTTIASDEFVSYHVHARRIVLGRVPVFAVHDFALAEQIWSGAPVFKKKDGGGLDFTSVVSRRFDDYANDRVLFPVVGANDAIAVSVDRDFVEVRALAPAHSVYGTRAFPDAESRKRFEASVADGRSFRDWPRVGTLFHDAASPRTVFTLTEGDFEILNVQLPGVLLLTSQT	284	Viruses; Baculoviridae; Alphabaculovirus
YP_009186701	YP_009186701.1		p26-1 [Sucra jujuba nucleopolyhedrovirus]	Sucra jujuba nucleopolyhedrovirus	MCQYQLLVASLLVINFSPNVLASNLSFNDSAINNVRYTIDHLTKTIDIHNVNDSNVNIVIVPPHSVASRREHNLDNFHQFPGVASDIVFSGVKKNDVIHVLLSNGVLYRTTSDRVYTNFHVDKHRMIYGQLPTFATDDFSLADKIYIGAPIFRNGKLASVITCRFDDYKNGLVLFPVSGVRTQDLVSGQIHFDESVFVKKLLPDMSVYGRKQLPYRQNNDLQNHTSTLNVKRFALAATNNRQMYRDWPRSVVVFYNDRNIFISLVEGEFEINRVRFSGPLIEPQQ	285	Viruses; Baculoviridae; Alphabaculovirus
YP_008378238	YP_008378238.1		p26-a [Hemileuca sp. nucleopolyhedrovirus]	Hemileuca sp. nucleopolyhedrovirus	MYYYTLLTLSCLISHFSVAKSNSGGITVTTTEETIKNIYNINYRVDHETKTMKIVKVNEIAADIRVFPPNGFTNFHEQLDIMYHYPGVASNVVLTGVPTSNGVVLQVLLDDGLLLRVVPERVYVNFHVHKQRLIYGQLYTFALDDFALAAKIYTGAPIFHGDKLVSVITCRYDEYNESLVVYPVTGARASGLVSGEINFDDKVVVSEWEEGADSKIYGRTQLLGSSPTNAQRFVMSSRNNRQMYRDWPRTAIVFHNRRDVSIGLVEGEFEISRVVFEGPLIVPQDK	286	Viruses; Baculoviridae; Alphabaculovirus; Hemileuca species nucleopolyhedrovirus
YP_009165631	YP_009165631.1		P26-1 [Perigonia lusca single nucleopolyhedrovirus]	Perigonia lusca single nucleopolyhedrovirus	MVNVVTILLMSLTTMLTVTADTHSASPTPQQPESQEVYEVEYSIDEINKRVNVIKHKGSSVHIEVFEPNGVSNGHEYLDTMHHFPGVASTVVFDGAYGGNDAILHVLLNDGTLARFTPSRVYTNFHSHKNRLVYGQMHSFVVBDYELANRIYLGAPIFQNRKLISVVSCRYDEYDDGIAVFPISAVRSAGLVSGQIEYDSRVIVHNFEPGMSVYGKKQLPYESTVPSMLSLKRFAINAHNNRRAYRDLPRAINVFHNRQNIVLTVTEGEFEMSRVRMDGPLVRPQT	286	Viruses; Baculoviridae; Alphabaculovirus; Perigonia lusca nucleopolyhedrovirus
YP_717557	YP_717557.1		P26 [Clanis bilineata nucleopolyhedrovirus]	Clanis bilineata nucleopolyhedrovirus	MSSTIFKTLAIYILYTMIASSQAHDTNVIPRAHGTHIIHNVIYTVNDVQRAINIQMVDGKEAQVVVIPPHSNTNNDDRLDMLHHFPGVATDIILPSIQANDMVEILLSDHVLWRTGVDANVFTNYHTHKNRIVFGQLRAVVVKDFTLADQIYIGAPVFKEKRLISVITCRFDDYTNQQVIFPLTGLRAAGLVSGQINYDDNVTVQQLKPGLSVYGRRQLPYKSNEALGQANIKRFAISTQNNRLAYRDMPRNVVFFHDQHNITITINENEFEIARFRFDGPLILPQN	287	Viruses; Baculoviridae; Alphabaculovirus
YP_002854661	YP_002854661.1		P26-1 [Euproctis pseudoconspersa nucleopolyhedrovirus]	Euproctis pseudoconspersa nucleopolyhedrovirus	MRSSSTSLAIFLSIVAAMISHGVSEKAIKSVYDVKYTVNRNNRIVDVISVNNKPLSVEIVAANGQSSGQKRLDLAHHFPGVIVDGLVFDTGVGFDARTVLQVLLDNGTLLRVVPDRVYTNFHTHNRRMVYGQLRTFALRNFAAADQIYIGAPIFLDGKLVSVVTCRFDDYDNGVVLFPVSAVRAPGLMSGQIHFDDKVIVEKLRPGMSIYGRVQLPYNAQNDSADSSILNLKRFAVSASDNRLMYRNLPRTIVVFHDRKQISIGLVEGEFEIDRVRLDGPLIVPQSVE	288	Viruses; Baculoviridae; Alphabaculovirus
YP_009111323	YP_009111323.1	DpCPV-22	hypothetical protein [Dendrolimus punctatus cypovirus 22]	Dendrolimus punctatus cypovirus 22	MDATLNLHLLVETIHHLTYLANQSTNQETTRVLEQYKQSVIDDLASKIVNDELIIPEKPTSAEKPMSVDDLAAPPGEDVPDIVLATDENSYVKRTHHHYAGFYSKNILPPICRDRAVDVNGKTYKLYDSMKTLNVQSSGNDTILTIEPIIFTPDELPKGAVVTNYGTNETVSLITSSYDTQHVNGHKGYPVNDGFKNINIHLAAPVEHVQKTKPIAYADKQFDTKAELIEYLKTVKPLPKIKAHLYTDKHNRGSQLIIHYDGVNIANIHLRARVVGNVIADCEYAPDV	288	Viruses; Riboviria; Orthornavirae; Duplornaviricota; Resentoviricetes; Reovirales; Reoviridae; Spinareovirinae; Cypovirus; unclassified Cypovirus
YP_009552165	YP_009552165.1		p26 [Malacosoma neustria nucleopolyhedrovirus]	Malacosoma neustria nucleopolyhedrovirus	MHIIFIASFLCSLFTASTTITNLAAPRIVNVYNVKCSVDHDSKTVTVFAVNNKSVDIVIAPPGKELTRSSSPISTMQHHQHRLNLHLMHHFPGVASTVFFPSLDKDDRVVVLMSNGALMRATLSHVVANFHTHDRRMVYGQLRSIAITDYSVAEKIYVGAPIFKNGHMVSVVTCRHDDFNSGVVQFPVTGARSEGLILGHVSFDNDEDNNVAVHKLDANVTIYGTTQLPYVSVSPVNGKKFALIVDRNRSNYRDLPRKVVVFHNDTDVLISLVEGQFEMQRIHFDGPLVKSFRRQRY	297	Viruses; Baculoviridae; Alphabaculovirus; unclassified Alphabaculovirus
ADV91363	ADV91363.1		p26b [Spodoptera frugiperda multiple nucleopolyhedrovirus]	Spodoptera frugiperda multiple nucleopolyhedrovirus	MYKMISVLEILVVAFTLCVSTSPLSTMATFNVKYTVDHETKRINVNSVLDAPVSIHVIPPNSDTNGDEKLTLLHQFPGVATNVIFPSITKDDDLYVQLNNGVLYKTRATRVYTNFHTHKNRMVYGQLYTIAVDDFEIANKIYIGAPGPPSRSTVSISLISNSCSPGIYRNKQLVSVITCRFDDYEAGLVMYPVTGIRPQGLISGQIQYDDRVGVETLRPSMSVYGRQQLPYKSAHMSVKQFAMTADMNRQLYRDLPRSVMLFHNNKEITITVVEGEFEMYRIRLDGPLVTNQESSNEEK	299	Viruses; Baculoviridae; Alphabaculovirus
YP_249623	YP_249623.1	ChchNPV	P26 [Chrysodeixis chalcites nucleopolyhedrovirus]	Chrysodeixis chalcites nucleopolyhedrovirus	MLLMSRLVGEKTQDKVLYKMIQSQFILSFMLTIASASMASTPTTTRRTKLNVEYSIDENEKIIRVVAVDGKAVRIETIRPHSDSNYIKTGDDQPPLSVLHHFPGVASDIVFPAIDNSNDSLMVLLNDGILFRVQPEHVYTNFHRHANRLIYGQLRTFAVDDLWIADKIWIGAPIFFNDRLVSVITCRYDDYDAGIVLFPVSGIRPKGLVSGQINYDSTVYVSLLRNGMSVYGKRQMAYSSPYMTVKKFALSTTANRLTYRDLPRNIAIFHNKKEISISLVEGEYEIDRIRLDGPLIVPQ	299	Viruses; Baculoviridae; Alphabaculovirus
YP_009666547	YP_009666547.1		p26 [Oxyplax ochracea nucleopolyhedrovirus]	Oxyplax ochracea nucleopolyhedrovirus	MTPNCVIYESLNSINMDLQFNLINIRLIKAFIIKALFLHQTITCVCVFVLFTPFSVSLTNKMQVYNVEIETDYSNNSMLVTKVNGENAFVKIFKPGQEINDEILNRYHQFPGIATSILFPQLHLHRNVQLLTSDHRLHDAELESVCFNFHVCNKRFVFGTLPAVIVDKRFVNLYVGAPIFFNEKIVSIVTTLHEISNDRWLVPVTGIREASLFSGHVKTNNGVRLEKWLPNTSIYGTKQLPYAEIKQYALEQEKTVIADAEKSCVIFYKESEIRITWNQGEHELMHIRMTGPFVESNFS	299	Viruses; Baculoviridae; Alphabaculovirus
YP_874211	YP_874211.1	EoNPV	p26-a [Ectropis obliqua nucleopolyhedrovirus]	Ectropis obliqua nucleopolyhedrovirus	MSKKVLIVVNNENVKMSLLFLTFMMSCIAVRSDPINIQHGTMYSTEYIIDHNARRVDVFKNNNENVSVHVIGAQGCTTGNENFDVLHHYPGVATDVVFTSAVKHTVLHVLLSDGILLRVTPTHTFTNFHSHKQRIIYGQLNTFSIDDFSLANKIYTGAPIFSNGKLVSVITARSDDFDKGLVYYPVTGARVPNLISGQIQYDNNAGPIKVEKFDSTMHIYGKKQLPVRSIDGYDNVLNIRRFYMSAMANRQMYRDWPRSISIFHDSNFVSIGLVEGEFQILQIEFEGPLIAADENKKTKC	300	Viruses; Baculoviridae; Alphabaculovirus
QIQ51344	QIQ51344.1		VP8 [Erinnyis ello cypovirus 2]	Erinnyis ello cypovirus 2	MSAAGHIEITETVKLIQHLTYLMSESTNIHATNAIGKYKQNLIDYVAHSIIEEGLVDDVEASASKNHLPKMANPADVEKAKLNPYHEVKDETRKDDVKENLVLATNETAFLSKTRHHYTGFYSKQILKPLPADGVVMVNDAPYKTGAVKKVVNAQKNGDSTIITVEPCLFTTDNLPVGSVVKDAEGNEYGMITSHYEAFNKRKAYPIQNAFEHPTVMVSVPCEHRVKEKLMAYADQQFDRKGDLVAYIESLGPKPDIGAIIYTDKYNKNPQLVVHANGHQIINMHLRKRIVGSFIAKAPYQPDSQ	305	Viruses; Riboviria; Orthornavirae; Duplornaviricota; Resentoviricetes; Reovirales; Reoviridae; Spinareovirinae; Cypovirus; unclassified Cypovirus
XP_008552911	XP_008552911.1		PREDICTED: uncharacterized protein LOC103575071 [Microplitis demolitor]	Microplitis demolitor	MGPRKSFIITDFILGVICIVAVTGESQQLPTVYNSGQYNNITFEYNHEDKVINTKTVNGKSVDIVILPINKMVPVDFMPSKNLDKLHQFPVIASSITLFGPSHNEPIEILTIKKQQTAAASDGDEMTTYKTRVYSNASSDRIMYHGYNRRLVWSQLMGVVLKKEVADTIYKGAPVFSSNTKKIISFITAREEYTTEDGEELVLFPLTAIKPKGYSSGQSLHESTEDILQYDTQGKFSVYGRRMMPYTELKAYIETVVTPENIQNSRTKKHESVVFYGKNDVTLTCVQGDVEIARTRIACNLIKPAVQ	307	Eukaryota; Metazoa; Ecdysozoa; Arthropoda; Hexapoda; Insecta; Pterygota; Neoptera; Holometabola; Hymenoptera; Apocrita; Terebrantes; Ichneumonoidea; Braconidae; Microgastrinae; Microplitis
YP_009049954	YP_009049954.1		p26 [Peridroma alphabaculovirus]	Peridroma alphabaculovirus	MLRCFLSNRVCAPTRDERGIIYYIKMSRVDVARARLQIRAMYKMAYLATVLALVAAMAVSANTLSKHNVTYTVDEVRRTMRVNTVDGVPVTIEPIPPHSDTDGRDELSVLHQFPGVATQVVFPPLAPTDTLFVQLNNKALYRTRAAAVYTNFHTHKGRMVYGQLLTIVVDDLAVAGKIYVGAPIFRDRKLVSVVTCRMDDYDKGVALFPVTGIRPRGLVSGQFNFDDRVIVQELRPGMSVYGRQQLPYDSAHMSVKHFALATVANKQAYRDMPRAIAVFHNQREVTVALVEGEFEVDRVRFDGPLIVPQE	310	Viruses; Baculoviridae; Alphabaculovirus; unclassified Alphabaculovirus
QED40546	QED40546.1		P26A [Chrysodeixis includens nucleopolyhedrovirus]	Chrysodeixis includens nucleopolyhedrovirus	MKLYIGFVALSYVVLQASAFVSPPQRVVNYPNRHKDEALELLTSKKLIMDSSNEIYSANLSNITKYNVHCSVDDTNKQMQVLQVDGKPVHIEVIPPNGETNGRDGLSLLHQFPGVASEVLFPPINDKDAHLYVLLNNGVLALVKPTKVYTNFHKHQGRFIYGQLRTFVIDDFSLADQIYIGAPIFMNKTLVSVVTCRYDDYDAGTVMFPVSGVRPNGLVSGQFHYDNNVLVSTLKPNMSVYGKHQMLYQSQFMSVKRFALTASANRLAYRDLPRSVAVFHNKKEIIITLTEGEFEIDRVRFDGPIVTPQHR	311	Viruses; Baculoviridae; Alphabaculovirus
QHB21712	QHB21712.1		P26-1 [Euproctis digramma nucleopolyhedrovirus]	Euproctis digramma nucleopolyhedrovirus	MMSIDLYWALSLVAMITSSVNALPASTGVDTRTVYGVRYKIDYDRRIIDVLSVNNKSCSVEVIAPNGRSSGRGGDLDLAHHFPGAIVTDIVFDVSAVNSHTVLHVLLDNGSLLRVVPDRVYTNFHTHNWRMVYGQLRTFAVDDFTLANRIYIGAPIFLNGKLVSVVTCRYDEYDLSLAMFPVSGIRSPGLVSGQIHFDDEVIVKNLRVGMSVYGKMQLPYNNAQVDNDDNKITNDANFDDDDDDDQNGGLALNAKRFAISATNNRRMYRNLPRTVAVFHDRDQVSIGLVEGEFEINRVRFDGPLIVPQGIDIR	313	Viruses; Baculoviridae; Alphabaculovirus; unclassified Alphabaculovirus
RVE41251	RVE41251.1	striped riceborer	hypothetical protein evm_014096 [Chilo suppressalis]	Chilo suppressalis	MPSLRFGVELKWNHHHQLISVPTAGAQAFPMDGIGRLGHNLPRGPSADWWVLTTANAAGTNGLTRLPKHGGTQDRRFLLTHLLTDHCEKIARAGFRGVARPWGNEGDDPKSGPDLHTICTSPLWFGDSVVGVSQLSSHTHHYCGVFTEELLAPLEELAYVRLDENLAEKVFINRTKRILLISSDGVLAQWRCAPTFESANKFIAGTPLVNARGQLVSVITARRGNHYAVSTLEGEGGYFETSQPWEVIPDCGPGLVYGDRVFPTREELQDHVTSLPPATVAGGEPTTPVLIAAPHPRLALITTNKRQLSHHFLPPSVLTTDIEYL	325	Eukaryota; Metazoa; Ecdysozoa; Arthropoda; Hexapoda; Insecta; Pterygota; Neoptera; Holometabola; Lepidoptera; Glossata; Ditrysia; Pyraloidea; Crambidae; Crambinae; Chilo
KAF4524375	KAF4524375.1		hypothetical protein B566_EDAN007551 [Ephemera danica]	Ephemera danica	MYLEAAITNKKMKEPEFSDYQLDMMKLPTSEEHTNTSTQTAFYTSITNSENNDEKYIAGRYIHNDSFLTADHCQKFGLDWLSTYDCLEGLNSFHVAQWSSIMLLEGVNIHAKGWSGAPIIARDQIMAFEGLDLDGNICTRKNYNEIKEFCSNIEDQIIHSFKDEPRIKLTGYDCDIIQNSRGVYTDPNQIITRVVHRDGAAPSFHGFPDLCTNKVLPTVEKDDNIEKLIYGVVPAFYSKEILQCGSPIFKDKKLVSVITQCYDDHYYTVSGISDFSGHIRTESYERKIVEAGEAVYGVTSAPYAVIKALAIEKSHLEPAGSSSVTLFAFKTQVRTDVTVTTENGVELLHLRYKASMINKPCI	362	Eukaryota; Metazoa; Ecdysozoa; Arthropoda; Hexapoda; Insecta; Pterygota; Palaeoptera; Ephemeroptera; Scapphodonta; Ephemeridae; Ephemera
GBP20819	GBP20819.1		hypothetical protein EVAR_14545_1 [Eumeta japonica]	Eumeta japonica	MPKKDYMKCYFGCRTKGPFHRFPKPDYPHSDRFDSWKAVLSPAIQNKGDSYICDNVRICDFHFEDRYRLPSKRLTRTGVPTLNIPIRSCVERTGYLLKPSTNQSNFGHFHKTGDAGPSGCVPSINLDDSQREQHLENTADGTAAAREVMSPPTALNPPPYEGVVERRAVPVELHNTTDGRPVARLGTCLPIHSTSAEEAARLALITHHYAGLFTENILSPLGELAYVRLDADTVEKVFVNRSRRILITSSDGRLAQWRAVPTFESRNRYVAGTPVVDGGGALVSVVLARRHNHYALAANDGEGGYFDTTEPWRVMDPPAGALVYADRWFTTREELRAYVSSLGPVDAGAPTPVLHRGARTRVSLVAPGGRQIAHVHLHTALTDDVEYL	388	Eukaryota; Metazoa; Ecdysozoa; Arthropoda; Hexapoda; Insecta; Pterygota; Neoptera; Holometabola; Lepidoptera; Glossata; Ditrysia; Tineoidea; Psychidae; Oiketicinae; Eumeta
YP_009133287	YP_009133287.1		p26b [Lambdina fiscellaria nucleopolyhedrovirus]	Lambdina fiscellaria nucleopolyhedrovirus	MTSATMYFDEFASGASMNINDDDNALNTKNDKTPSSASIDINVKTPFQACSDNCFYCDLCYCKEGQHSQKPLSSQLKVFENEQKLLQKQPSLSLLSSSSVTKYSQNDANVYSVAENNVEELCVVGDSRSAPHGIEDNLQRRDDGVRVFEIKNVRFAVNFTLKQVFAHAYKGNSINVHVVSHRDVCVAPSAVHVYPGVLSQFKLPELKAASCVQVVRFNANNEMYVSVERLDTKLYYVHHHRNNDYVYGLVPAIRCVSFENARTAFLGAPIFDSRNNLVSFVTNHYMDVYHDGGCVLPVVGKSSRLFSSMRITGAVQVRYEDNNRLELPTSALSGAHTTATKNEIKIAQKQLQKQQQQLVDLNVSVRRKRINLFLIHNGRVLMHTNIKSLFAGSMLYC	397	Viruses; Baculoviridae; Alphabaculovirus
AAU01367_extraction	AER57985.1		schlafen-like protein [Camelpox virus]	Camelpox virus	MAMFYAHAFGGYDENLHAFPGISSTVANDVRKYSVVSVYNKKYNIVKNKYMWCNSQVNKRYIGALLPMFECNEYLQIGDPIHDLEGNQISIVTYRHKNYYALSGIGYESLDLCLEGVGIHHHVLETGNAVYGKVQHEYSTIKEKAKEMNALKPGPIIDYHVWIGDCVCQVTTVDVHGKEIMRMRFKRGAVLPIPNLVKVKVGEENDTINLSTSISA	216	Viruses; Varidnaviria; Bamfordvirae; Nucleocytoviricota; Pokkesviricetes; Chitovirales; Poxviridae; Chordopoxvirinae; Orthopoxvirus
AAY96971_extraction	AAU01367.1		MPXV-WRAIR157 [Monkeypox virus]	Monkeypox virus	MAMFYAHAFGGYDENLHAFPGISSTVANDVRKYSVVSVYNKKYNIVKNKYMWCNSQVNKRYIGALLPMFECNEYLQIGDPIHDLEGNQISIVTYRHKNYYALSGIGYESLDLCLEGVGIHHHVLETGNAVYGKVQHEYSTIKEKAKEMNALKPGPIIDYHVWIGDCVCQVTTVDVHGKEIMRMRFKRGAVLPIPNLVKVKVGEENDTINLSTSISA	216	Viruses; Varidnaviria; Bamfordvirae; Nucleocytoviricota; Pokkesviricetes; Chitovirales; Poxviridae; Chordopoxvirinae; Orthopoxvirus
AAY97169_extraction	AAY96971.1		unknown [Monkeypox virus]	Monkeypox virus	MFYAHAFGGYDENLHAFPGISSTVANDVRKYSVVSVYNKKYNIVKNKYMWCNSQVNKRYIGALLPMFECNEYLQIGDPIHDLEGNQISIVTYRHKNYYALSGIGYESLDLCLEGVGIHHHVLETGNAVYGKVQHEYSTIKEKAKEMNALKPGPIIDYHVWIGDCVCQVTTVDVHGKEIMRMRFKRGAVLPIPNLVKVKVGEENDTINLSTSISA	214	Viruses; Varidnaviria; Bamfordvirae; Nucleocytoviricota; Pokkesviricetes; Chitovirales; Poxviridae; Chordopoxvirinae; Orthopoxvirus
ABD97531_extraction	AAY97169.1		unknown [Monkeypox virus]	Monkeypox virus	MAMFYAHAFGGYDENLHAFPGISSTVANDVRKYSVVSVYNNKYDIVKDKYMWCYSQVNKRYIGALLPMFECNEYLQIGDPIHDQEGNQISIVTYRHKNYYALSGIGYESLDLCLEGVGIHHHVLETGNAVYGKVQHDYSTIKEKAKEMNSLSPGPIIDYHVWIGDCVCQVTAVDVHGKEIMRMRFKKGAVLPIPNLVKVKVGEKNDTVNLSTSISA	216	Viruses; Varidnaviria; Bamfordvirae; Nucleocytoviricota; Pokkesviricetes; Chitovirales; Poxviridae; Chordopoxvirinae; Orthopoxvirus
ADK39194_extraction	ABD97531.1		unknown [Cowpox virus]	Cowpox virus	MFYAHAFGGYDENLHAFPGISSTVANDVRKYSVVSVYNKKYNIVKNKYMWCNSQVNKRYIGALLPMFECNEYLQIGDPIHDLEGNQISIVTYRHKNYYALSGIGYESLDLCLEGVGIHHHVLETGNAVYGKVQHEYSTIKEKAKEMNALKPGPIIDYHVWIGDCVCQVTTVDVHGKEIMRMRFKRGAVLPIPNLVKVKVGEENDTINLSTSISA	214	Viruses; Varidnaviria; Bamfordvirae; Nucleocytoviricota; Pokkesviricetes; Chitovirales; Poxviridae; Chordopoxvirinae; Orthopoxvirus
ADX22817_extraction	ADK39194.1		unknown protein [Monkeypox virus]	Monkeypox virus	MFYAHAFGGYDENLHAFPGISSTVANDVRKYSVVSVYNKKYNIVKNKYMWCNSQVNKRYIGALLPMFECNEYLQIGDPIHDLEGNQISIVTYRHKNYYALSGIGYESLDLCLXGVGIHHHVLETGNAVYGKVQHEYSTIKEKAKEMNALKPGPIIDYHVWIGDCVCQVTTVDVHGKEIMRMRFKRGAVLPIPNLVKVKVGEENDTINLSTSISA	214	Viruses; Varidnaviria; Bamfordvirae; Nucleocytoviricota; Pokkesviricetes; Chitovirales; Poxviridae; Chordopoxvirinae; Orthopoxvirus
ADX23013_extraction	ADX22817.1		unknown [Monkeypox virus]	Monkeypox virus	MFYAHAFGGYDENLHAFPGISSTVANDVRKYSVVSVYNKKYNIVKNKYMWCNSQVNKRYIGALLPMFECNEYLQIGDPIHDLEGNQISIVTYRHKNYYALSGIGYESLDLCLEGVGIHHHVLETGNAVYGKVQHEYSTIKEKAKEMNALKPGPIIDYHVWIGDCVCQVTTVDVHGKEIMRMRFKRGAVLPIPNLVKVKVGEENDTINLSTSISA	214	Viruses; Varidnaviria; Bamfordvirae; Nucleocytoviricota; Pokkesviricetes; Chitovirales; Poxviridae; Chordopoxvirinae; Orthopoxvirus
ADZ24189_extraction	ADX23013.1		unknown [Monkeypox virus]	Monkeypox virus	MAMFYAHALGGYDENLHAFPGISSTVANDVRKYSVVSVYNNKYDIVKDKYMWCYSQVNKRYIGALLPMFECNEYLQIGDPIHDQEGNQISIITYRHKNYYALSGIGYESLDLCLEGVGIHHHVLETGNAVYGKVQHDYSTIKEKAKEMSALSPGPIIDYHVWIGDCICQVTAVDVHGKEIMKMRFKKGAVLQIPNLVKVKLGENDTENLSTAISA	215	Viruses; Varidnaviria; Bamfordvirae; Nucleocytoviricota; Pokkesviricetes; Chitovirales; Poxviridae; Chordopoxvirinae; Orthopoxvirus
ADZ29302_extraction	ADZ24189.1		hypothetical protein CPXV_AUS1999_867_185 [Cowpox virus]	Cowpox virus	MAMFYAHALGGYDENLHAFPGISSTVANDVRKYSVVSVYNNKYDIVKDKYMWCYSQVNKRYIGALLPMFECNEYLQIGDPIHDQEGNQISIITYRHKNYYALSGIGYESLDLCLEGVGIHHHVLETGNAVYGKVQHDYSTIKEKAKEMSTLSPGPIIDYHVWIGDCICQVTAVDVHGKEIMKMRFKKGAVLQIPNLVKVKLGENDTENLSTAISA	215	Viruses; Varidnaviria; Bamfordvirae; Nucleocytoviricota; Pokkesviricetes; Chitovirales; Poxviridae; Chordopoxvirinae; Orthopoxvirus
ADZ29515_extraction	ADZ29302.1		hypothetical protein CPXV_FIN2000_MAN_185 [Cowpox virus]	Cowpox virus	MELCKIFVDKKIKNNVVIITLASATENMAMFYAHAFGGYDENLHAFPGISSTVANDVRKYSVVSVYNKKYKIVKDKYMWCYSQVNKRYIGALLPMFECNEYLQIGDPIHDLEGNQISIVTYRHKNYYALSGIGYESLDVCLEGVGIHHHTLEAGNAVYGKVQHDYYTIKEKAKEMNSLSPGPIIDYHVWIGDCVCQVTAVDVHGKEIMRMRFKRGAVLPIPNLVKVKVGEENDTVNLSTSISA	243	Viruses; Varidnaviria; Bamfordvirae; Nucleocytoviricota; Pokkesviricetes; Chitovirales; Poxviridae; Chordopoxvirinae; Orthopoxvirus
ADZ29730_extraction	ADZ29515.1		hypothetical protein CPXV_FRA2001_NANCY_185 [Cowpox virus]	Cowpox virus	MELCKIFVDKKIKNNVVIITLASATENMAMFYAHALGGYDENLHAFPGISSTVANDVRKYSVVSVYNNKYDIVKDKYMWCYSQVNKRYIGALLPMFECNEYLQIGDPIHDQEGNQISIVTYRHKNYYALSGIGYESLDLCLEGVGIHHHVLETGNAVYGKVQHDYSTIKEKAKEMNSLSPGPIIDYHVWIGDCICQVTAVDVHGKEIMRMRFKRGAVLPIPNLVKVKVGEENDTVNLSTSISA	243	Viruses; Varidnaviria; Bamfordvirae; Nucleocytoviricota; Pokkesviricetes; Chitovirales; Poxviridae; Chordopoxvirinae; Orthopoxvirus
ADZ29943_extraction	ADZ29730.1		hypothetical protein CPXV_GER1980_EP4_185 [Cowpox virus]	Cowpox virus	MELCKIFVDKKIKNNVVIITLASATENMAMFYAHAFGGYDENLHAFPGISSTVANDVRKYSVVSVYNKKYKIVKNKYMWCYSQVNKRYIGALLPMFECNEYLQIGDPIHDLEGNQISIVTYRNKNYYALSGIGYESLDVCLEGVGIHHHTLEAGNAVYGKVQHDYYTIKEKAKEMNSLSPGPIIDYHVWIGDCVCQVTAVDVHGKEIMRMRFKKGAMLPIPNLVKVKVGEENDTVNLSTSISA	243	Viruses; Varidnaviria; Bamfordvirae; Nucleocytoviricota; Pokkesviricetes; Chitovirales; Poxviridae; Chordopoxvirinae; Orthopoxvirus
ADZ30159_extraction	ADZ29943.1		hypothetical protein CPXV_GER1990_2_185 [Cowpox virus]	Cowpox virus	MELCKIFVDKKIKNNLVIITLASATENMAMFYAHAFGGYDENLHAFPGISSTVANDVRKYSVVSVYNNKYDIVKDKYMWCYSQVNKRYIGALLPMFECNEYLQIGDPIHDQEGNQISIVTYRHKNYYALSGIGYESLDLCLEGVGIHHHVLETGNAVYGKVQHDYSTIKEKAKEMNSLSPGPIIDYHVWIGDCVCQVTAVDVHGKEIMRMRFKKGAVLPIPNLVKVKVGEKNDTVNLSTSISA	243	Viruses; Varidnaviria; Bamfordvirae; Nucleocytoviricota; Pokkesviricetes; Chitovirales; Poxviridae; Chordopoxvirinae; Orthopoxvirus
ADZ30373_extraction	ADZ30159.1		hypothetical protein CPXV_GER1998_2_185 [Cowpox virus]	Cowpox virus	MELCKIFVDKKIKNNVVIITLASATENMAMFYAHALGGYDENLHAFPGISSTVANDVRKYSVVSVYNNKYDIVKDKYMWCYSQVNKRYIGALLPMFECNEYLQIGDPIHDQEGNQISIVTYRHKNYYALSGIGYESLDLCLEGVGIHHHVLETGNAVYGKVQHDYSTIKEKAKEMNSLSPGPIIDYHVWIGDCICQVTAVDVHGKEIMRMRFKRGAVLPIPNLVKVKVGEENDTVNLSSAISA	243	Viruses; Varidnaviria; Bamfordvirae; Nucleocytoviricota; Pokkesviricetes; Chitovirales; Poxviridae; Chordopoxvirinae; Orthopoxvirus
ADZ30584_extraction	ADZ30373.1		hypothetical protein CPXV_GER2002_MKY_185 [Cowpox virus]	Cowpox virus	MAMFYAHAFGGYDENLHAFPGISSTVANDVRKYSVVSVYNKKYKIVKNKYMWCYSQVNKRYIGALLPMFECNEYLQIGDPIHDLEGNQISIVTYHNKNYYALSGIGCDSLDLCLEGVGIHHHTLEAGNAVYGKVQHDYYTIKEKAKEMNALKPGPIIDYHVWIGDCVCQVTAVDVHGKEIMRMRFKRGAVLPIPNLVKVKVGEENDTVNLSTSISA	216	Viruses; Varidnaviria; Bamfordvirae; Nucleocytoviricota; Pokkesviricetes; Chitovirales; Poxviridae; Chordopoxvirinae; Orthopoxvirus
ADZ30796_extraction	ADZ30584.1		hypothetical protein CPXV_NOR1994_MAN_185 [Cowpox virus]	Cowpox virus	MAMFYAHAFGGYDENLHAFPGISSTVANDVRKYSLVSVYNNKYKIVKNKYMWCYSQVNKRYIGALLPMFECNEYLQIGDPIHDLEGNQISIVTYRHKNYYALSGIGYESLDLCLEGVGIHHHTLEAGNAVYGKVQHDYSTIKEKAKEMNALSPGPIIDYHVWIGDCVCQVTAVDVHGKEIMRMRFKKGAVLPIPNLVKVKLGEENDTVNLSTSISA	216	Viruses; Varidnaviria; Bamfordvirae; Nucleocytoviricota; Pokkesviricetes; Chitovirales; Poxviridae; Chordopoxvirinae; Orthopoxvirus
AER57985_extraction	ADZ30796.1		hypothetical protein CPXV_UK2000_K2984_185 [Cowpox virus]	Cowpox virus	MAMFYAHALGGYDENIHAFPGISSTVANDVRKYSVVSVYNNKYDIIKDKYMWCYSQVNKRYIGALLPMFECNEYLQIGDPIHDQEGNQISIVTYRHKNYYALSGIGYESLDLCLEGVGIHHHVLETGNAVYGKVQHDYSTIKEKAKEMSTLSPGPIIDYHVWIGNCICQVTAVDVHGKEIMRMRFKKGAVLQIPNLVKVKLGENDSENLSTTISA	215	Viruses; Varidnaviria; Bamfordvirae; Nucleocytoviricota; Pokkesviricetes; Chitovirales; Poxviridae; Chordopoxvirinae; Orthopoxvirus
AGR34907_extraction	AGR34907.1		hypothetical protein MPXVgp165 [Monkeypox virus]	Monkeypox virus	MFYAHAFGGYDENLHAFPGISSTVANDVRKYSVVSVYNKKYNIVKNKYMWCNSQVNKRYIGALLPMFECNEYLQIGDPIHDLEGNQISIVTYRHKNYYALSGIGYESLDLCLEGVGIHHHVLETGNAVYGKVQHEYSTIKEKAKEMNAFKPGPIIDYHVWIGDCVCQVTTVDVHGKEIMRMRFKRGAVLPIPNLVKVKVGEENDTINLSTSISA	214	Viruses; Varidnaviria; Bamfordvirae; Nucleocytoviricota; Pokkesviricetes; Chitovirales; Poxviridae; Chordopoxvirinae; Orthopoxvirus
AGY97061_extraction	AGY97061.1		CPXV197 protein [Cowpox virus]	Cowpox virus	MAMFYAHALGGYDENLHAFPGISSTVANDVRKYSVVSVYNNKYDIVKDKYMWCYSQVNKRYIGALLPMFECNEYLQIGDPIHDQEGNQISIVTYRHKNYYALSGIGYESLDLCLEGVGIHHHVLETGNAVYGKVQHDYSTIKEKAKEMNSLSPGPIIDYHVWIGDCICQVTAVDVHGKEIMRMRFKRGAVLPIPNLVKVKVGEENDTVNLSSAISA	216	Viruses; Varidnaviria; Bamfordvirae; Nucleocytoviricota; Pokkesviricetes; Chitovirales; Poxviridae; Chordopoxvirinae; Orthopoxvirus
AGY97274_extraction	AGY97274.1		CPXV197 protein [Cowpox virus]	Cowpox virus	MAMFYAHALGGYDENLHAFPGISSTVANDVRKYSVVSVYNNKYDIVKDKYMWCYSQVNKRYIGALLPMFECNEYLQIGDPIHDQEGNQISIVTYRHKNYYALSGIGYESLDLCLEGVGIHHHVLETGNAVYGKVQHDYSTIKEKAKEMNSLSPGPIIDYHVWIGDCICQVTAVDVHGKEIMRMRFKRGAVLPIPNLVKVKVGEENDTVNLSSAISA	216	Viruses; Varidnaviria; Bamfordvirae; Nucleocytoviricota; Pokkesviricetes; Chitovirales; Poxviridae; Chordopoxvirinae; Orthopoxvirus
AGY97490_extraction	AGY97490.1		CPXV197 protein [Cowpox virus]	Cowpox virus	MAMFYAHALGGYDENLHAFPGISSTVANDVRKYSVVSVYNNKYDIVKDKYMWCYSQVNKRYIGALLPMFECNEYLQIGDPIHDQEGNQISIVTYRHKNYYALSGIGYESLDLCLEGVGIHHHVLETGNAVYGKVQHDYSTIKEKAKEMNSLSPGPIIDYHVWIGDCICQVTAVDVHGKEIMRMRFKRGAVLPIPNLVKVKVGEENDTVNLSSAISA	216	Viruses; Varidnaviria; Bamfordvirae; Nucleocytoviricota; Pokkesviricetes; Chitovirales; Poxviridae; Chordopoxvirinae; Orthopoxvirus
AGY97706_extraction	AGY97706.1		CPXV197 protein [Cowpox virus]	Cowpox virus	MAMFYTHAFGGYDENLHAFPGISSTVANDVRKYSVVSVYNKKYKIVKNKYMWCYSQVNKRYIGALLPMFECNEYLQIGDPIHDLEGNQISIVTYRHKNYYALSGIGYESLDVCLEGVGIHHHTLEAGNAVYGKVQHDYYTIKEKAKEMNSLSPGPIIDYHVWIGDCVCQVTAVDVHGKEIMRMRFKKGAVLPIPNLVKVKVGEENDTVNLSTSISA	216	Viruses; Varidnaviria; Bamfordvirae; Nucleocytoviricota; Pokkesviricetes; Chitovirales; Poxviridae; Chordopoxvirinae; Orthopoxvirus
AGY97927_extraction	AGY97927.1		CPXV197 protein [Cowpox virus]	Cowpox virus	MAMFYAHALGGYDENLHAFPGISSTVANDVRKYSVVSVYNNKYDIVKDKYMWCYSQVNKRYIGALLPMFECNEYLQIGDPIHDQEGNQISIVTYRHKNYYALSGIGYESLDLCLEGVGIHHHVLETGNAVYGKVQHDYSTIKEKAKEMNSLSPGPIIDYHVWIGDCICQVTAVDVHGKEIMRMRFKRGAVLQIPNLVKVKVGEENDTVNLSSAISA	216	Viruses; Varidnaviria; Bamfordvirae; Nucleocytoviricota; Pokkesviricetes; Chitovirales; Poxviridae; Chordopoxvirinae; Orthopoxvirus
AGY98136_extraction	AGY98136.1		CPXV197 protein [Cowpox virus]	Cowpox virus	MAMFYAHALGGYDENLHAFPGISSTVANDVRKYSVVSVYNNKYDIVKDKYMWCYSQVNKRYIGALLPMFECNEYLQIGDPIHDQEGNQISIVTYRHKNYYALSGIGYESLDLCLEGVGIHHHVLETGNAVYGKVQHDYSTIKEKAKEMNSLSPGPIIDYHVWIGDCICQVTAVDVHGKEIMRMRFKRGAVLPIPNLVKVKVGEENDTVNLSTSISA	216	Viruses; Varidnaviria; Bamfordvirae; Nucleocytoviricota; Pokkesviricetes; Chitovirales; Poxviridae; Chordopoxvirinae; Orthopoxvirus
AGY98783_extraction	AGY98783.1		CPXV197 protein [Cowpox virus]	Cowpox virus	MAMFYAHAFGGYDENLHAFPGISSTVANDVRKYSVVSVYNNKYDIVKDKYMWCYSQVNKRYIGALLPMFECNEYLQIGDPIHDQEGNQISIVTYRHKNYYALSGIGYESLDLCLEGVGIHHHVIETGNAVYGKVQHDYSTIKEKAKEMNSLSPGPIIDYHVWIGDCVCQVTAVDVHGKEIMRMRFKKGAVLPIPNLVKVKVGEENDTVNLSTSISA	216	Viruses; Varidnaviria; Bamfordvirae; Nucleocytoviricota; Pokkesviricetes; Chitovirales; Poxviridae; Chordopoxvirinae; Orthopoxvirus
AGY99208_extraction	AGY99208.1		CPXV197 protein [Cowpox virus]	Cowpox virus	MAMFYAHALGGYDENLHAFPGISSTVANDVRKYSVVSVYNNKYDIVKDKYMWCYSQVNKRYIGALLPMFECNEYLQIGDPIHDQEGNQISIVTYRHKNYYALSGIGYESLDLCLEGVGIHHHVLETGNAVYGKVQHDYSTIKEKAKEMNSLSPGPIIDYHVWIGDCVCQVTAVDVHGKEIMRMRFKRGAVLPIPNLVKVKVGEENDTVNLSSAISA	216	Viruses; Varidnaviria; Bamfordvirae; Nucleocytoviricota; Pokkesviricetes; Chitovirales; Poxviridae; Chordopoxvirinae; Orthopoxvirus
AGY99415_extraction	AGY99415.1		CPXV197 protein [Cowpox virus]	Cowpox virus	MAMFYAHALGGYDENLHAFPGISSTVANDVRKYSVVSVYNNKYDIVKDKYMWCYSQVNKRYIGALLPMFECNEYLQIGDPIHDQEGNQISIVTYRHKNYYALSGIGYESLDLCLEGVGIHHHVLETGNAVYGKVQHDYSTIKEKAKEMNSLSPGPIIDYHVWIGDCICQVTAVDVHGKEIMRMRFKRGAVLQIPNLVKVKVGEENDTVNLSSAISA	216	Viruses; Varidnaviria; Bamfordvirae; Nucleocytoviricota; Pokkesviricetes; Chitovirales; Poxviridae; Chordopoxvirinae; Orthopoxvirus
AGZ00482_extraction	AGZ00482.1		CPXV197 protein [Cowpox virus]	Cowpox virus	MAMFYAHAFGGYDENLHAFPGISSTVANDVRKYSVVSVYNNKYDIVKDKYMWCYSQVNKRYIGALLPMFECNEYLQIGDPIHDQEGNQISIVTYRHKNYYALSGIGYESLDLCLEGVGIHHHVLETGNAVYGKVQHDYSTIKEKAKEMNSLSPGPIIDYHVWIGDCICQVTAVDVHGKEIMRMRFKRGAVLPIPNLVKVKVGEENDTVNLSSSISA	216	Viruses; Varidnaviria; Bamfordvirae; Nucleocytoviricota; Pokkesviricetes; Chitovirales; Poxviridae; Chordopoxvirinae; Orthopoxvirus
AIE40776_extraction	AIE40776.1		hypothetical protein MPXV-W_Nigeria-156 [Monkeypox virus]	Monkeypox virus	MAMFYAHAFGGYDENLHAFPGISSTVANDVRKYSVVSVYNKKYNIVKNKYMWCNSQVNKRYIGALLPMFECNEYLQIGDPIHDLEGNQISIVTYRHKNYYALSGIGYESLDLCLEGVGIHHHVLETGNAVYGKVQHEYSTIKEKAKEMNALKPGPIIDYHVWIGDCVCQVTTVDVHGKEIMRMRFKRGAVLPIPNLVKVKVGEENDTINLSTSISA	216	Viruses; Varidnaviria; Bamfordvirae; Nucleocytoviricota; Pokkesviricetes; Chitovirales; Poxviridae; Chordopoxvirinae; Orthopoxvirus
AKA20382_extraction	AKA20382.1		Schlafen-like virulence protein [Camelpox virus]	Camelpox virus	MAMFYAHALGGYDENIHAFPGISSTVANDVRKYSVVSVYNNKYDIIKDKYMWCYSQVNKRYIGALLPMFECNEYLQIGDPIHDQEGNQISIVTYRHKNYYALSGIGYESLDLCLEGVGIHHHVLETGNAVYGKVQHDYSTIKEKAKEMSTLSPGPIIDYHVWIGDCICQVTAVDVHGKEIMRMRFKKGAVLQIPNLVKVKLGENDSENLSTTISA	215	Viruses; Varidnaviria; Bamfordvirae; Nucleocytoviricota; Pokkesviricetes; Chitovirales; Poxviridae; Chordopoxvirinae; Orthopoxvirus
AKA20383_extraction	AKA20383.1		Schlafen-like virulence protein [Camelpox virus]	Camelpox virus	MAMFYAHALGGYDENIHAFPGISSTVANDVRKYPVVSVYNNKYDIIKDKYMWCYSQVNKRYIGALLPMFECNEYLQIGDPIHDQEGNQISIVTYRHKNYYALSGIGYESLDLCLEGVGIHHHVLETGNAVYGKVQHDYSTIKEKAKEMSTLSPGPIIDYHVWIGDCICQVTAVDVHGKEIMRMRFKKGAVLQIPNLVKVKLGENDSENLSTTISA	215	Viruses; Varidnaviria; Bamfordvirae; Nucleocytoviricota; Pokkesviricetes; Chitovirales; Poxviridae; Chordopoxvirinae; Orthopoxvirus
AKA20384_extraction	AKA20384.1		Schlafen-like virulence protein [Camelpox virus]	Camelpox virus	MAMFYAHALGGYDENIHAFPGISSTVANDVRKYPVVSVYNNKYDIIKDKYMWCYSQVNKRYIGALLPMFECNEYLQIGDPIHDQEGNQISIVTYRHKNYYALSGIGYESLDLCLEGVGIHHHVLETGNAVYGKVQHDYSTIKEKAKEMSTLSPGPIIDYHVWIGDCICQVTAVDVHGKEIMRMRFKKGAVLQIPNLVKVKLGENDSENLSTTISA	215	Viruses; Varidnaviria; Bamfordvirae; Nucleocytoviricota; Pokkesviricetes; Chitovirales; Poxviridae; Chordopoxvirinae; Orthopoxvirus
AKA20385_extraction	AKA20385.1		Schlafen-like virulence protein [Camelpox virus]	Camelpox virus	MAMFYAHALGGYDENIHAFPGISSTVANDVRKYSVVSVYNNKYDIIKDKYMWCYSQVNKRYIGALLPMFECNEYLQIGDPIHDQEGNQISIVTYRHKNYYALSGIGYESLDLCLEGVGIHHHVLETGNAVYGKVQHDYSTIKEKAKEMSTLSPGPIIDYHVWIGDCICQVTAVDVHGKEIMRMRFKKGAVLQIPNLVKVKLGENDSENLSTTISA	215	Viruses; Varidnaviria; Bamfordvirae; Nucleocytoviricota; Pokkesviricetes; Chitovirales; Poxviridae; Chordopoxvirinae; Orthopoxvirus
AKG51327_extraction	AKG51327.1		Schlafen-like protein [Monkeypox virus]	Monkeypox virus	MFYAHAFGGYDENLHAFPGISSTVANDVRKYSVVSVYNKKYNIVKNKYMWCNSQVNKRYIGALLPMFECNEYLQIGDPIHDLEGNQISIVTYRHKNYYALSGIGYESLDLCLEGVGIHHHVLETGNAVYGKVQHEYSTIKEKAKEMNALKPGPIIDYHVWIGDCVCQVTTVDVHGKEIMRMRFKRGAVLPIPNLVKVKVGEENDTINLSTSISA	214	Viruses; Varidnaviria; Bamfordvirae; Nucleocytoviricota; Pokkesviricetes; Chitovirales; Poxviridae; Chordopoxvirinae; Orthopoxvirus
AQQ13047_extraction	AQQ13047.1		hypothetical protein [Cowpox virus]	Cowpox virus	MAMFYAHALGGYDENLHAFPGISSTVANDVRKYSVVSVYNNKYDIVKDKYMWCYSQVNKRYIGALLPMFECNEYLQIGDPIHDQEGNQISIITYRHKNYYALSGIGYESLDLCLEGVGIHHHVLETGNAVYGKVQHDYSTIKEKAKEMSTLSPGPIIDYHVWIGDCICQVTAVDVHGKEIMKMRFKKGAVLQIPNLVKVKLGENDTENLSTAISA	215	Viruses; Varidnaviria; Bamfordvirae; Nucleocytoviricota; Pokkesviricetes; Chitovirales; Poxviridae; Chordopoxvirinae; Orthopoxvirus
ARB50413_extraction	ARB50413.1		hypothetical protein [Cowpox virus]	Cowpox virus	MELCKIFVDKKIKNNVVIITLASATENMAMFYAHALGGYDENLHAFPGISSTVANDVRKYSVVSVYNNKYDIVKDKYMWCYSQVNKRYIGALLPMFECNEYLQIGDPIHDQEGNQISIVTYRHKNYYALSGIGYESLDLCLEGVGIHHHVLETGNAVYGKVQHDYSTIKEKAKEMSALSPGPIIDYHVWIGDCICQVTAVDVHGKEIMRMRFKRGAVLPIPNLVKVKVGEENDTVNLSTSISA	243	Viruses; Varidnaviria; Bamfordvirae; Nucleocytoviricota; Pokkesviricetes; Chitovirales; Poxviridae; Chordopoxvirinae; Orthopoxvirus
ARR29774_extraction	ARR29774.1		CPXV197 protein [Cowpox virus]	Cowpox virus	MAMFYAHAFGGYDENLHAFPGISSTVANDVRKYSGVSVYNNKYDIVKDKYMWCYSYVNKRYIGALLPMFECNEYLQIGDPIHDLEGNQISIVTYRHKNYYALSGIGYESLDLCLEGVGIHHHTLEAGNAVYGKVQHDYSTIKEKAKEMNSLSPGPIIDYHVWIGDCVCQVTAVDVHGKEIMRMRFKKGAVLPIPNLVKVKLGEENDTVNLSTSISA	216	Viruses; Varidnaviria; Bamfordvirae; Nucleocytoviricota; Pokkesviricetes; Chitovirales; Poxviridae; Chordopoxvirinae; Orthopoxvirus
ARR29978_extraction	ARR29978.1		CPXV197 protein [Cowpox virus]	Cowpox virus	MAMFYAHAFGGYDENLHAFPGISSTVANDVRKYSVVSVYNNKYKIVKNKYMWCYSQVNKRYIGALLPMFECNEYLQIGDPIHDLEGNQISIVTYRHKNYYALSGIGYESLDLCLEGVGIHHHTLEAGNAVYGKVQHDYSTIKEKAKEMNSLSPGPIIDYHVWIGDCVCQVTAVDVHGKEIMRMRFKKGAVLPIPNLVKVKLGEENDTVNLSTSISA	216	Viruses; Varidnaviria; Bamfordvirae; Nucleocytoviricota; Pokkesviricetes; Chitovirales; Poxviridae; Chordopoxvirinae; Orthopoxvirus
ARR30598_extraction	ARR30598.1		CPXV197 protein [Cowpox virus]	Cowpox virus	MAMFYAHAFGGYDENLHAFPGISSTVANDVRKYSVVSVYNNKYKIVKNKYMWCYSQVNKRYIGALLPMFECNEYLQIGDPIHDLEGNQISIVTYRHKNYYALSGIGYESLDLCLEGVGIHHHTLEAGNAVYGKVQHDYSTIKEKAKEMNALSPGPIIDYHVWIGDCVCQVTAVDVHGKEIMRMRFKKGAVLPIPNLVKVKLGEENDTVNLSTSISA	216	Viruses; Varidnaviria; Bamfordvirae; Nucleocytoviricota; Pokkesviricetes; Chitovirales; Poxviridae; Chordopoxvirinae; Orthopoxvirus
ATB55462_extraction	ATB55462.1		CPXV197 protein [Cowpox virus]	Cowpox virus	MAMFYAHAFGGYDENLHAFPGISSTVANDVRKYSVVSVYNKKYKIVKNKYMWCYSQVNKRYIGALLPMFECNDYLQIGDPIHDLEGNQISIVTYRHKNYYALSGIGYESLDVCLEGVGIHHHTLEAGNAVYGKVQHEYHTIKEKAKEMNSLSPGPIIDYHVWIGDCVCQVTAVDVHGKEIMRMRFKKGAVLPIPNLVKVKVGEENDTVNLSTSISA	216	Viruses; Varidnaviria; Bamfordvirae; Nucleocytoviricota; Pokkesviricetes; Chitovirales; Poxviridae; Chordopoxvirinae; Orthopoxvirus
ATB56106_extraction	ATB56106.1		CPXV197 protein [Cowpox virus]	Cowpox virus	MAMFYAHAFGGYDENLHAFPGISSTVANDVRKYSIVSVYNKKYKIVKNKYMWCYSQVNKRYIGALLPMFECNDYLQIGDPIHDLEGNQISIVTYRHKNYYALSGIGYESLDVCLEGVGIHHHTLEAGNAVYGKVQHEYHTIKEKAKEMNSLSPGPIIDYHVWIGDCVCQVTAVDVHGKEIMRMRFKKGAVLPIPNLVKVKVGEENDTVNLSTSISA	216	Viruses; Varidnaviria; Bamfordvirae; Nucleocytoviricota; Pokkesviricetes; Chitovirales; Poxviridae; Chordopoxvirinae; Orthopoxvirus
AUW64391_extraction	AUW64391.1		hypothetical protein MPXV298464_139 [Monkeypox virus]	Monkeypox virus	MAMFYAHAFGGYDENLHAFPGISSTVANDVRKYSVVSVYNKKYNIVKNKYMWCNSQVNKRYIGALLPMFECNEYLQIGDPIHDLEGNQISIVTYRHKNYYALSGIGYESLDLCLEGVGIHHHVLETGNAVYGKVQHEYSTIKEKAKEMNALKPGPIIDYHVWIGDCVCQVTTVDVHGKEIMRMRFKRGAVLPIPNLVKVKVGEENDTINLSTSISA	216	Viruses; Varidnaviria; Bamfordvirae; Nucleocytoviricota; Pokkesviricetes; Chitovirales; Poxviridae; Chordopoxvirinae; Orthopoxvirus
AXN74977_extraction	AXN74977.1		schlafen-like protein [Akhmeta virus]	Akhmeta virus	MAMFYAHALGGYDENLHAFPGISSTVANDVRKYSVVSVYNNKYDIVKDKYMWCYSQVNKRYIGALLPMFECNEYLQIGVPIHDQEGNQISIITYRHKNYYALSGIGYESLDLCLEGVGIQHHTLEEGNAVYGRVQHDYSIIKDIAKEMNSARPGPIIDYHVWIGDCICQVTAVDVHGKEIMRMRFKKGAVLQIPNLVKVKLGENDTENLSTTISA	215	Viruses; Varidnaviria; Bamfordvirae; Nucleocytoviricota; Pokkesviricetes; Chitovirales; Poxviridae; Chordopoxvirinae; Orthopoxvirus
AXN75416_extraction	AXN75416.1		schlafen-like protein [Akhmeta virus]	Akhmeta virus	MAMFYAHALGGYDENLHAFPGISSTVANDVRKYSVVSVYNNKYDIVKDKYMWCYSQVNKRYIGALLPMFECNEYLQIGVPIHDQEGNQISIITYRHKNYYALSGIGYESLDLCLEGVGIHHHTLEEGNAVYGRVQHDYSIIKDIAKEMNSDIPGPIIDYHVWIGDCICQVTAVDVHGKEIMRMRFKKGAVLQIPNLVKVKLGENDTENLSTTISA	215	Viruses; Varidnaviria; Bamfordvirae; Nucleocytoviricota; Pokkesviricetes; Chitovirales; Poxviridae; Chordopoxvirinae; Orthopoxvirus
AYN64747_extraction	AYN64747.1		putative B2R protein [Orthopoxvirus Abatino]	Orthopoxvirus Abatino	MAMFYTHAFGGYDENLHAFPGISSTVANDVRKYSVVSVYNKKYKIVKNKYMWCYSQVNKRYIGALLPMFECNEYLQIGDPIHDLEGNQISIVTYRDKNYYALSGIGYESLDLCLEGVGIHHHTLETGNAVYGKVQHDYSTIKEKAKEMNALSPGPIIDYHVWIGDCICQVTAVDVHGKEIMRMRFKKGAVLPIPNLVKVKLGKNDTENLSSAISA	215	Viruses; Varidnaviria; Bamfordvirae; Nucleocytoviricota; Pokkesviricetes; Chitovirales; Poxviridae; Chordopoxvirinae; Orthopoxvirus; unclassified Orthopoxvirus
CAD90728_extraction	CAD90728.1		B2R protein [Cowpox virus]	Cowpox virus	MAMFYAHALGGYDENLHAFPGISSTVANDVRKYSVVSVYNNKYDIVKDKYMWCYSEVNKRYIGALLPMFECNEYLQIGDPIHDQEGNQISIITYRHKNYYALSGIGYESLDLCLEGVGIHHHVLETGNAVYGKVQHDYSTIKEKAKEMSTLSPGPIIDYHVWIGDCICQVTAVDVHGKEIMKMRFKKGAVLQIPNLVKVKLGENDTENLSTAISA	215	Viruses; Varidnaviria; Bamfordvirae; Nucleocytoviricota; Pokkesviricetes; Chitovirales; Poxviridae; Chordopoxvirinae; Orthopoxvirus
CRL86988_extraction	CRL86988.1		CPXV197 protein [Cowpox virus]	Cowpox virus	MAMFYAHAFGGYDENLHAFPGISSTVANDVRKYSVVSVYNNKYDIVKDKYMWCYSQVNKRYIGALLPMFECNEYLQIGDPIHDQEGNQISIVTYRHKNYYALSGIGYESLDLCLEGVGIHHHVLETGNAVYGKVQHDYSTIKEKVKEMSALSPGPIIDYHVWIGDCVCQVTAVDVHGKEIMRMRFKKGAVLPIPNLVKVKVGEENDTVNLSTSISA	216	Viruses; Varidnaviria; Bamfordvirae; Nucleocytoviricota; Pokkesviricetes; Chitovirales; Poxviridae; Chordopoxvirinae; Orthopoxvirus
NP_536592_extraction	NP_536592.1		B4R [Monkeypox virus Zaire-96-I-16]	Monkeypox virus Zaire-96-I-16	MFYAHAFGGYDENLHAFPRISSTVANDVRKYSVVSVYNKKYNIVKNKYMWCNSQVNKRYIGALLPMFECNEYLQIGDPIHDLEGNQISIVTYRHKNYYALSGIGYESLDLCLEGVGIHHHVLETGNAVYGKVQHEYSTIKEKAKEMNALKPGPIIDYHVWIGDCVCQVTTVDVHGKEIMRMRFKRGAVLPIPNLVKVKVGEENDTINLSTSISA	214	Viruses; Varidnaviria; Bamfordvirae; Nucleocytoviricota; Pokkesviricetes; Chitovirales; Poxviridae; Chordopoxvirinae; Orthopoxvirus
NP_570569_extraction	NP_570569.1		CMLV179 [Camelpox virus]	Camelpox virus	MAMFYAHALGGYDENIHAFPGISSTVANDVRKYSVVSVYNNKYDIIKDKYMWCYSQVNKRYIGALLPMFECNEYLQIGDPIHDQEGNQISIVTYRHKNYYALSGIGYESLDLCLEGVGIHHHVLETGNAVYGKVQHDYSTIKEKAKEMSTLSPGPIIDYHVWIGDCICQVTAVDVHGKEIMRMRFKKGAVLQIPNLVKVKLGENDSENLSTTISA	215	Viruses; Varidnaviria; Bamfordvirae; Nucleocytoviricota; Pokkesviricetes; Chitovirales; Poxviridae; Chordopoxvirinae; Orthopoxvirus
NP_619978_extraction	NP_619978.1		CPXV197 protein [Cowpox virus]	Cowpox virus	MAMFYAHAFGGYDENLHAFPGISSTVANDVRKYSVVSVYNNKYDIVKDKYMWCYSYVNKRYIGALLPMFECNEYLQIGDPIHDLEGNQISIVTYRHKNYYALSGIGYESLDLCLEGVGIHHHTLEAGNAVYGKVQHDYSTIKEKAKEMNSLSPGPIIDYHVWIGDCVCQVTAVDVHGKEIMRMRFKKGAVLPIPNLVKVKLGEENDTVNLSTSISA	216	Viruses; Varidnaviria; Bamfordvirae; Nucleocytoviricota; Pokkesviricetes; Chitovirales; Poxviridae; Chordopoxvirinae; Orthopoxvirus
NP_671672_extraction	NP_671672.1		EVM153 [Ectromelia virus]	Ectromelia virus	MAMFYTHAFGGYDENLHAFPGISSTVANDVRKYSVVSVYNKKYKIVKNKYMWCYSQVNKRYIGALLPMFECNEYLQIGDPIHDQEGNQISIITYRHKNYYALSGIGYESLDLCLEGVGIHHHVLETGNAVYGKVQHDYSTIKEKAKEMSALSPGPIIDYHVWIGDCICQVTAVDVHGKEIMRMRFKKGAVLQIPNLVKVKLGENDTENLSTAISA	215	Viruses; Varidnaviria; Bamfordvirae; Nucleocytoviricota; Pokkesviricetes; Chitovirales; Poxviridae; Chordopoxvirinae; Orthopoxvirus
QED21131_extraction	QED21131.1		Schlafen-like virulence protein [Alaskapox virus]	Alaskapox virus	MAMARFYAHSLGGYDENLHAFPGLSSTVANDVRKYSVVSVYNTKYHIVKDKYMWCYSYVENRYIGALLPVFECDEYLQIGSPIHDEEGNQISIVTYRHKKYYALSGIGYESLDLCLEGVGIHHHALEAGNAVYGKVQHDYSTIKDIAKEMNSASPGPIIDYHVWVGDCLCQVTAVDVHGKEIMRIRFKRGAMLPIPNLVKFTFGENDTENLSSAISA	217	Viruses; Varidnaviria; Bamfordvirae; Nucleocytoviricota; Pokkesviricetes; Chitovirales; Poxviridae; Chordopoxvirinae; Orthopoxvirus; unclassified Orthopoxvirus
QEM24903_extraction	QEM24903.1		CPXV197 protein [Cowpox virus]	Cowpox virus	MAMFYAHAFGGYDENLHAFPGISSTVANDVRKYSVVSVYNNKYKIVKNKYMWCYSQVNKRYIGALLPMFECNEYLQIGDPIHDLEGNQISIVTYRHKNYYALSGIGYESLDLCLEGVGIHHHTLEAGNAVYGKVQHDYSTIKEKAKEMNALSPGPIIDYHVWIGDCVCQVTAVDVHGKEIMRMRFKKGAVLPIPNLVKVKLGEENDTVNLSTSISA	216	Viruses; Varidnaviria; Bamfordvirae; Nucleocytoviricota; Pokkesviricetes; Chitovirales; Poxviridae; Chordopoxvirinae; Orthopoxvirus
QEM25256_extraction	QEM25256.1		CPXV197 protein [Cowpox virus]	Cowpox virus	MAMFYAHALGGYDENLHAFPGISSTVANDVRKYSVVSVYNNKYDIVKDKYMWCYSQVNKRYIGALLPMFECNEYLQIGDPIHDQEGNQISIITYRHKNYYALSGIGYESLDLCLEGVGIHHHVLETGNAVYGKVQHDYSTIKEKAKEMSALSPGPIIDYHVWIGDCICQVTAVDVHGKEIMKMRFKKGAVLQIPNLVKVKLGEENDTENLSTSISA	216	Viruses; Varidnaviria; Bamfordvirae; Nucleocytoviricota; Pokkesviricetes; Chitovirales; Poxviridae; Chordopoxvirinae; Orthopoxvirus
QEQ49523_extraction	QEQ49523.1		Schlafen [Akhmeta virus]	Akhmeta virus	MAMFYAHALGGYDENLHAFPGISSTVANDVRKYSVVSVYNNKYDIVKDKYMWCYSQVNKRYIGALLPMFECNEYLQIGVPIHDQEGNQISIITYRHKNYYALSGIGYESLDLCLEGVGIHHHTLEEGNAVYGRVQHDYSIIKDIAKEMNSARPGPIIDYHVWIGDCICQVTAVDVHGKEIMRMRFKKGAVLQIPNLVKVKLGENDTENLSTTISA	215	Viruses; Varidnaviria; Bamfordvirae; Nucleocytoviricota; Pokkesviricetes; Chitovirales; Poxviridae; Chordopoxvirinae; Orthopoxvirus
QEQ49736_extraction	QEQ49736.1		Schlafen [Akhmeta virus]	Akhmeta virus	MAMFYAHALGGYDENLHAFPGISSTVANDVRKYSVVSVYNNKYDIVKDKYMWCYSQVNKRYIGALLPMFECNEYLQIGVPIHDQEGNQISIITYRHKNYYALSGIGYESLDLCLEGVGIHHHTLEEGNAVYGRVQHDYSIIKDIAKEMNSVIPGPIIDYHVWIGDCICQVTAVDVHGKEIMRMRFKKGAVLQIPNLVKVKLGENDTENLSTTISA	215	Viruses; Varidnaviria; Bamfordvirae; Nucleocytoviricota; Pokkesviricetes; Chitovirales; Poxviridae; Chordopoxvirinae; Orthopoxvirus
SMZ64733_extraction	SMZ64733.1		Putative DNA-binding protein [Cowpox virus]	Cowpox virus	MELCKIFVDKKIKNNVVIITLASATEIMAMFYAHAFGGYDENLHAFPGISSTVANDVRKYSVVSVYNKKYKIVKDKYMWCYSQVNKRYIGALLPMFECNDYLQIGDPIHDLEGNQISIVTYRHKNYYALSGIGYESLDVCLEGVGIHHHTLEAGNAVYGKVQHDYYTIKEKAKEMNSLSPGPIIDYHVWIGDCVCQVTAVDVHGKEIMRMRFKKGAVLPIPNLVKVKVGEENDTVNLSTSISA	243	Viruses; Varidnaviria; Bamfordvirae; Nucleocytoviricota; Pokkesviricetes; Chitovirales; Poxviridae; Chordopoxvirinae; Orthopoxvirus
SNB48651_extraction	SNB48651.1		CPXV197 protein [Cowpox virus]	Cowpox virus	MELCKIFVDKKIKNNLVIITLASATENMAMFYAHAFGGYDENLHAFPGISSTVANDVRKYSVVSVYNKKYKIVKNKYMWCYSQVNKRYIGALLPMFECNEYLQIGDPIHDLEGNQISIVTYRNKNYYALSGIGYESLDVCLEGVGIHHHTLEAGNAVYGKVQHDYYTIKEKAKEMNSLSPGPIIDYHVWIGDCVCQVTAVDVHGKEIMRMRFKRGAVLPIPNLVKVKVGEENDTVNLSTSISA	243	Viruses; Varidnaviria; Bamfordvirae; Nucleocytoviricota; Pokkesviricetes; Chitovirales; Poxviridae; Chordopoxvirinae; Orthopoxvirus
SNB49083_extraction	SNB49083.1		CPXV197 protein [Cowpox virus]	Cowpox virus	MELCKIFVDKKIKNNVVIITLASATENMAMFYAHALGGYDENLHAFPGISSTVANDVRKYSVVSVYNNKYDIVKDKYMWCYSQVNKRYIGALLPMFECNEYLQIGDPIHDQEGNQISIVTYRHKNYYALSGIGYESLDLCLEGVGIHHHVLETGNAVYGKVQHDYSTIKEKAKEMNSLSPGPIIDYHVWIGDCICQVTAVDVHGKEIMRMRFKRGAVLQIPNLVKVKVGEENDTVNLSSAISA	243	Viruses; Varidnaviria; Bamfordvirae; Nucleocytoviricota; Pokkesviricetes; Chitovirales; Poxviridae; Chordopoxvirinae; Orthopoxvirus
SNB49432_extraction	SNB49432.1		CPXV197 protein [Cowpox virus]	Cowpox virus	MAMFYAHAFGGYDENLHAFPGISSTVANDVRKYSVVSVYNNKYDIVKDKYMWCYSQVNKRYIGALLPMFECNEYLQIGDPIHDQEGNQISIVTYRHKNYYALSGIGYESLDLCLEGVGIHHHVLETGNAVYGKVQHDYSTIKEKVKEMNSLSPGPIIDYHVWIGDCVCQVTAVDVHGKEIMRMRFKKGAVLPIPNLVKVKVGEENDTVNLSTSISA	216	Viruses; Varidnaviria; Bamfordvirae; Nucleocytoviricota; Pokkesviricetes; Chitovirales; Poxviridae; Chordopoxvirinae; Orthopoxvirus
SNB51826_extraction	SNB51826.1		CPXV197 protein [Cowpox virus]	Cowpox virus	MELCKIFVDKKIKNNVVIITLASATENMAMFYAHALGGYDENLHAFPGISSTVANDVRKYSVVSVYNNKYDIVKDKYMWCYSQVNKRYIGALLPMFECNEYLQIGDPIHDQEGNQISIVTYRHKNYYALSGIGYESLDLCLEGVGIHHHVLETGNAVYGKVQHDYSTIKEKAKEMSALSPGPIIDYHVWIGDCICQVTAVDVHGKEIMRMRFKRGAVLPIPNLVKVKVGEENDTVNLSTSISA	243	Viruses; Varidnaviria; Bamfordvirae; Nucleocytoviricota; Pokkesviricetes; Chitovirales; Poxviridae; Chordopoxvirinae; Orthopoxvirus
SNB54269_extraction	SNB54269.1		CPXV197 protein [Cowpox virus]	Cowpox virus	MAMFYAHAFGGYDENLHAFPGISSTVANDVRKYSVVSVYNKKYKIVKNKYMWCYSQVNKRYIGALLPMFECNEYLQIGDPIHDLEGNQISIVTYRNKNYYALSGIGYESLDLCLEGVGIHHHTLEAGNAVYGKVQHDYHTIKEKAKEMNALKPGPIIDYHVWIGDCVCQVTAVDVHGKEIMRMRFKRGAMLPIPNLVKVKVGEENDTVNLSTSISA	216	Viruses; Varidnaviria; Bamfordvirae; Nucleocytoviricota; Pokkesviricetes; Chitovirales; Poxviridae; Chordopoxvirinae; Orthopoxvirus
SPN68879_extraction	SPN68879.1		CPXV197 protein [Cowpox virus]	Cowpox virus	MELCKIFVDKKIKNNVVIITLASATENMAMFYAHALGGYDENLHAFPGISSTVANDVRKYSVVSVYNNKYDIVKDKYMWCYSQVNKRYIGALLPMFECNEYLQIGDPIHDQEGNQISIVTYRHKNYYALSGIGYESLDLCLEGVGIHHHVLETGNAVYGKVQHDYSTIKEKAKEMNSLSPGPIIDYHVWIGDCICQVTAVDVHGKEIMRMRFKRGAVLPIPNLVKVKVGEENDTVNLSSAISA	243	Viruses; Varidnaviria; Bamfordvirae; Nucleocytoviricota; Pokkesviricetes; Chitovirales; Poxviridae; Chordopoxvirinae; Orthopoxvirus
SPN69159_extraction	SPN69159.1		CPXV197 protein [Cowpox virus]	Cowpox virus	MELCKIFVDKKIKNNVVIITLASATENMAMFYAHALGGYDENLHAFPGISSTVANDVRKYSVVSVYNNKYDIVKDKYMWCYSQVNKRYIGALLPMFECNEYLQIGDPIHDQEGNQISIVTYRHKNYYALSGIGYESLDLCLEGVGIHHHVLETGNAVYGKVQHDYSTIKEKAKEMSALSPGPIIDYHVWIGDCICQVTAVDVHGKEIMRMRFKRGAVLPIPNLVKVKVGEENDTVNLSTSISA	243	Viruses; Varidnaviria; Bamfordvirae; Nucleocytoviricota; Pokkesviricetes; Chitovirales; Poxviridae; Chordopoxvirinae; Orthopoxvirus
YP_009143488_extraction	YP_009143488.1		Schlafen-like protein [Raccoonpox virus]	Raccoonpox virus	MAVFKPHSLGGYDENLHSFPGLSSTVANDVRNHSSIVVFGAKYDIIKDKYIWCFSYVKNRYIGALLPMFECKDHLQIGDPIYDTEGSQISIVTYRHKQYYALSGIGYESLDLSLDGIGVHHHILEEGKAVYGKIQRDYTAIKELAKEMNSIEAGPIVDYHIWIGESICQITAVDENGKEVMRVRFKKGAVLQIPNTIRVQLGQNDNENLFSAISA	215	Viruses; Varidnaviria; Bamfordvirae; Nucleocytoviricota; Pokkesviricetes; Chitovirales; Poxviridae; Chordopoxvirinae; Orthopoxvirus
YP_009281928_extraction	YP_009281928.1		schlafen [Volepox virus]	Volepox virus	MAVFNSHFLGGYDENLHSFPGLSSTVANDVRNHSSISVYKAKFNIVKDKYMWCYSYVKNRYIGALLPMFECNEYLQIGDPIYDTEGKQISIVTYRHKQYYALSGIGYESLDVSLDGIGIHHHILEEGKAVYGSVQRDYDAIKELAKEMKYIESGPIVDYHIWIGESICQITAVDENRKEVMRVRFKKGAVLQIPNTIRLLLGKNDNENLFSAVSA	215	Viruses; Varidnaviria; Bamfordvirae; Nucleocytoviricota; Pokkesviricetes; Chitovirales; Poxviridae; Chordopoxvirinae; Orthopoxvirus
YP_009282874_extraction	YP_009282874.1		schlafen [Skunkpox virus]	Skunkpox virus	MAVFNSHSLGGYDENLHSFPGLSSTVANDVRNHSVISVLGAKFNIVKDKYMWCYSYVKNRYIGALLPMFECNDYLQIGDPIHDTEGNQISIITYRHKQYYALSGIGYESLDVSLNGIGIHHHILEEGKAVYGKVQRDYTAIKELAKEMNYIGSGPIVEYHIWIGASICQITAVDENGKEVMRVRIKKGAVLQIPNMIRVQLGKNDNENLFSAISA	215	Viruses; Varidnaviria; Bamfordvirae; Nucleocytoviricota; Pokkesviricetes; Chitovirales; Poxviridae; Chordopoxvirinae; Orthopoxvirus
YP_717493_extraction	YP_717493.1		hypothetical protein TATV_DAH68_186 [Taterapox virus]	Taterapox virus	MAMFYAHALGGYDENLHAFPGISSTVANDVRKYSVVSVYNNKYDIVKDKYMWCYSQVNKRYIGALMPMFECNEYLQIGDPIHDQEGNQISIVTYRHKNYYALSGIGYESLDLCLEGVGIHHHVLETGNAVYGKVQHDYSTIKEKAKEMSALSPGPIIDYHVWIGDCICQVTAVDVHGKEIMRMRFKKGAVLQIPNLVKVKLGENDTENLSTTISA	215	Viruses; Varidnaviria; Bamfordvirae; Nucleocytoviricota; Pokkesviricetes; Chitovirales; Poxviridae; Chordopoxvirinae; Orthopoxvirus
